# Supplementary material for: Repeatability of IVIM biomarkers from diffusion‐weighted MRI in head and neck: Bayesian probability versus neural network
Source: PubMed Central journal article supplement — Magn Reson Med. 2021 Jan 26;85(6):3394–402. doi: 10.1002/mrm.28671 (PMC7986193; doi:10.1002/mrm.28671), 2021-01-26

# Supporting Information

Supporting information for *Repeatability of IVIM biomarkers from diffusion-weighted MR imaging in head and neck: Bayesian probability versus neural network.*

## Contents

|                                                                       |     |
|-----------------------------------------------------------------------|-----|
| Examples of regions of interest .....                                 | 2   |
| P-values of comparison wCV .....                                      | 3   |
| Neural network inconsistencies in parametric maps. ....               | 4   |
| Parametric IVIM maps – 100 instances of IVIM-NET.....                 | 5   |
| Parametric IVIM maps – 100 instances of IVIM-NET <sub>mod</sub> ..... | 106 |

## Examples of regions of interest

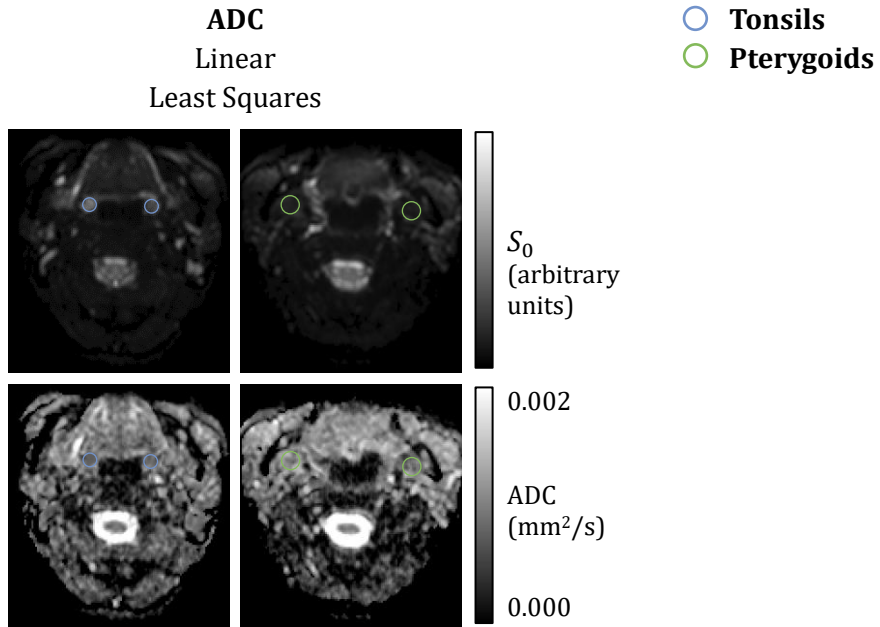

Supporting Information Figure 1S: ADC maps with examples of the regions of interest indicated.

## P-values of comparison wCV

| $D_t$         | PTERYGOID               |          | TONSIL                  |          | PTERYGOID |          | TONSIL   |          | p-value       |
|---------------|-------------------------|----------|-------------------------|----------|-----------|----------|----------|----------|---------------|
|               | IVIM-NET <sub>mod</sub> | IVIM-NET | IVIM-NET <sub>mod</sub> | IVIM-NET | Bayesian  | Bayesian | Bayesian | Bayesian |               |
| Nonlinear     | 0.004                   | 0.131    | 0.002                   | 0.020    | 0.004     | 0.002    |          |          | INTRA-SESSION |
| Least Squares | 0.004                   | 0.193    | 0.010                   | 0.049    | 0.037     | 0.084    |          |          | INTER-SESSION |
| Bayesian      | 0.275                   | 0.160    | 0.027                   | 0.193    |           |          |          |          | INTRA-SESSION |
|               | 0.160                   | 0.557    | 0.064                   | 0.492    |           |          |          |          | INTER-SESSION |
| IVIM-NET      | 0.770                   | 0.193    |                         |          |           |          |          |          | INTRA-SESSION |
|               | 0.492                   | 0.010    |                         |          |           |          |          |          | INTER-SESSION |

Supporting Information Table 1S: Wilcoxon signed-rank test p-values, comparing paired wCV values of the methods for  $D_t$ .

| $D_p$         | PTERYGOID               |          | TONSIL                  |          | PTERYGOID |          | TONSIL   |          | p-value       |
|---------------|-------------------------|----------|-------------------------|----------|-----------|----------|----------|----------|---------------|
|               | IVIM-NET <sub>mod</sub> | IVIM-NET | IVIM-NET <sub>mod</sub> | IVIM-NET | Bayesian  | Bayesian | Bayesian | Bayesian |               |
| Nonlinear     | 0.105                   | 0.004    | 0.002                   | 0.002    | 0.002     | 0.002    |          |          | INTRA-SESSION |
| Least Squares | 0.014                   | 0.002    | 0.002                   | 0.002    | 0.002     | 0.002    |          |          | INTER-SESSION |
| Bayesian      | 0.064                   | 0.625    | 0.375                   | 0.020    |           |          |          |          | INTRA-SESSION |
|               | 0.014                   | 0.695    | 0.020                   | 0.105    |           |          |          |          | INTER-SESSION |
| IVIM-NET      | 0.105                   | 0.131    |                         |          |           |          |          |          | INTRA-SESSION |
|               | 0.049                   | 0.084    |                         |          |           |          |          |          | INTER-SESSION |

Supporting Information Table 2S: Wilcoxon signed-rank test p-values, comparing paired wCV values of the methods for  $D_p$ .

| $f_p$         | PTERYGOID               |          | TONSIL                  |          | PTERYGOID |          | TONSIL   |          | p-value       |
|---------------|-------------------------|----------|-------------------------|----------|-----------|----------|----------|----------|---------------|
|               | IVIM-NET <sub>mod</sub> | IVIM-NET | IVIM-NET <sub>mod</sub> | IVIM-NET | Bayesian  | Bayesian | Bayesian | Bayesian |               |
| Nonlinear     | 0.625                   | 0.006    | 0.922                   | 0.002    | 0.006     | 0.064    |          |          | INTRA-SESSION |
| Least Squares | 0.006                   | 0.002    | 1.000                   | 0.002    | 0.006     | 0.846    |          |          | INTER-SESSION |
| Bayesian      | 0.064                   | 0.020    | 0.002                   | 0.014    |           |          |          |          | INTRA-SESSION |
|               | 0.695                   | 0.002    | 0.006                   | 0.002    |           |          |          |          | INTER-SESSION |
| IVIM-NET      | 0.695                   | 0.375    |                         |          |           |          |          |          | INTRA-SESSION |
|               | 0.002                   | 0.492    |                         |          |           |          |          |          | INTER-SESSION |

Supporting Information Table 3S: Wilcoxon signed-rank test p-values, comparing paired wCV values of the methods for  $f_p$ .

## Neural network inconsistencies in parametric maps.

Below are some notable examples of visual differences between instances of the neural networks.

Maps of all instances for both IVIM-NET and IVIM-NET<sub>mod</sub> have also been included.

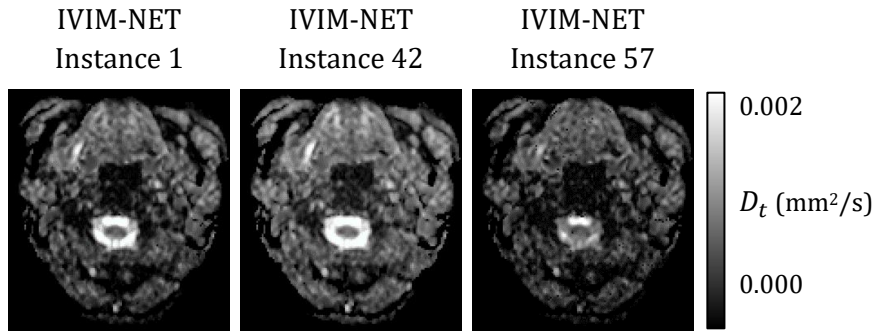

Supporting Information Figure 2S: Example of  $D_t$  maps from three instances of IVIM-NET with similar distribution but different absolute values.

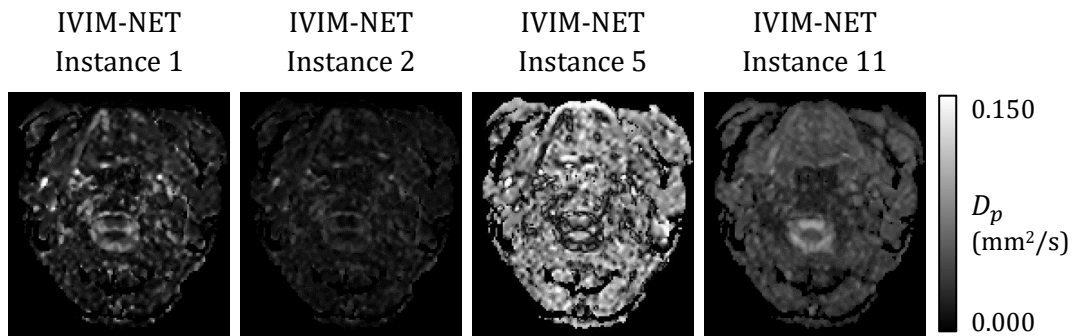

Supporting Information Figure 3S: Example of  $D_p$  maps from four instances of IVIM-NET: two with similar distribution but different values (instance 1 and 2) and two with a different distribution (instance 5 and 11).

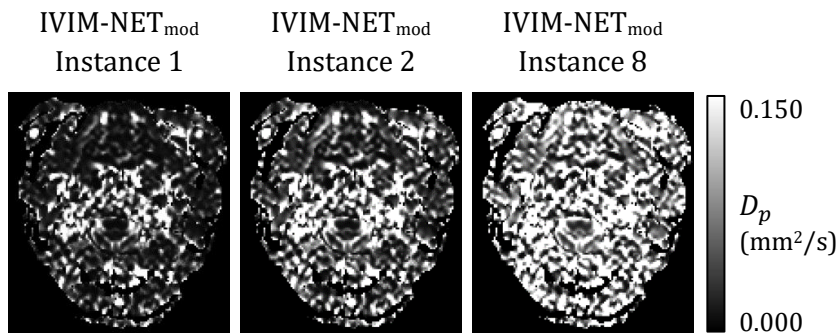

Supporting Information Figure 4S: Example of  $D_p$  maps from three instances of IVIM-NET<sub>mod</sub> with different values.

# Parametric IVIM maps

100 instances of IVIM-NET

(Set your PDF viewer to single page view for easy comparison.)

# Network instance 1

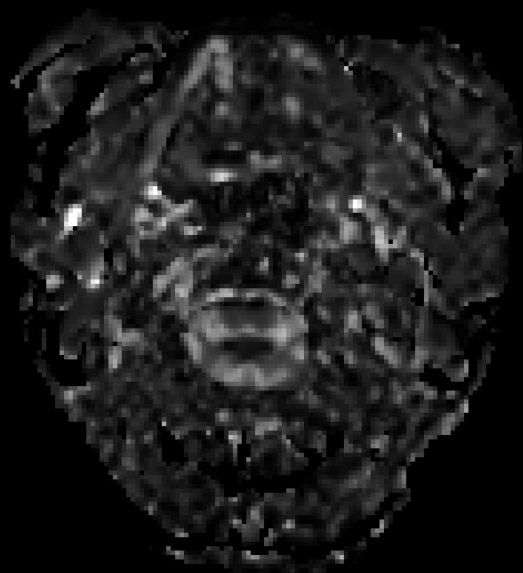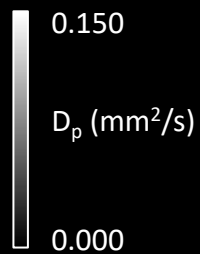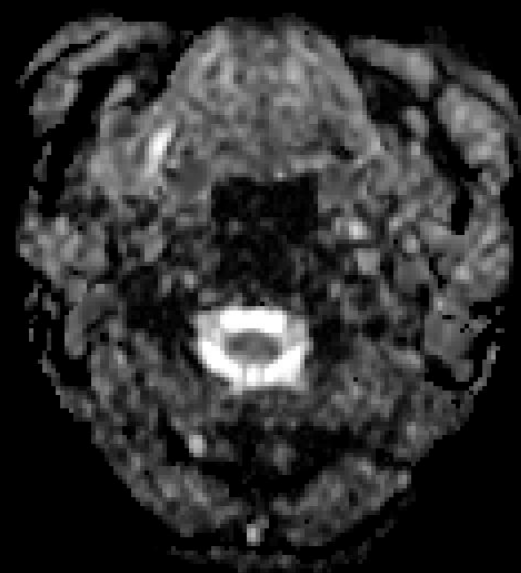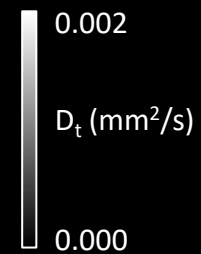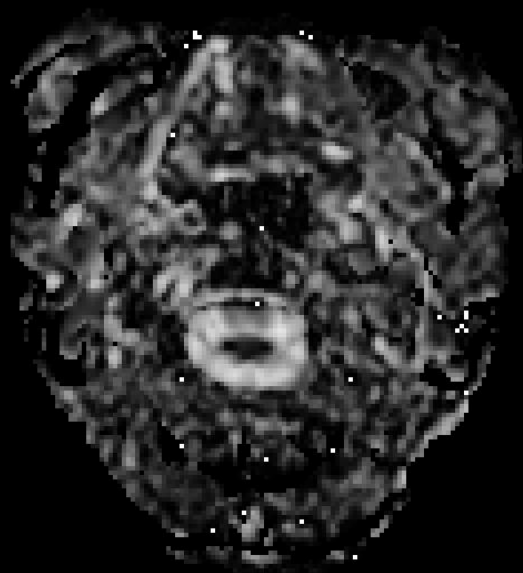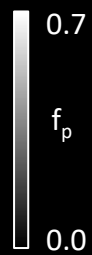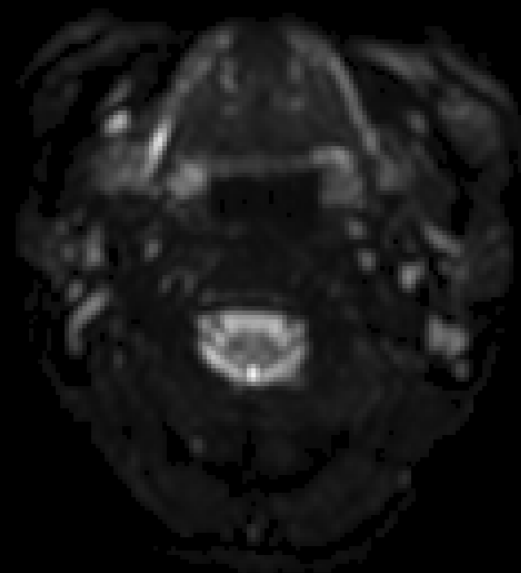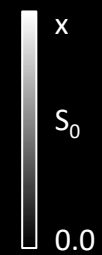

# Network instance 2

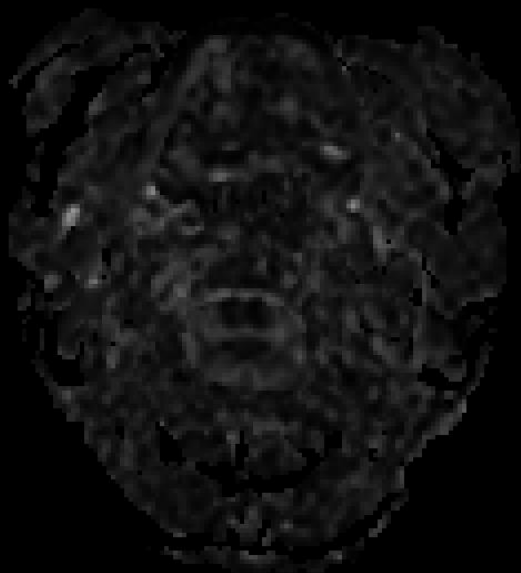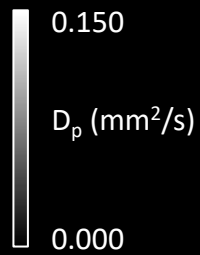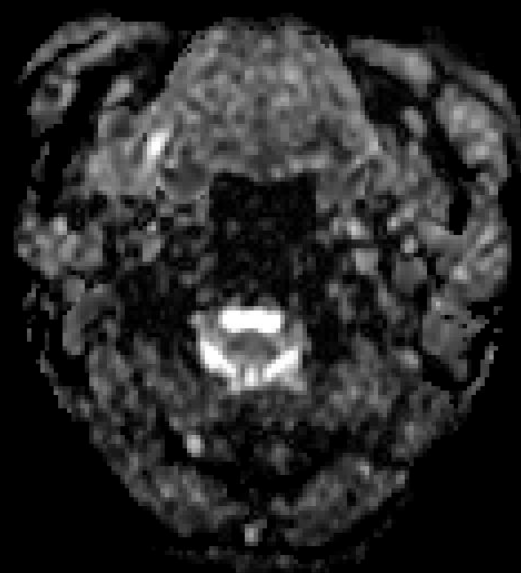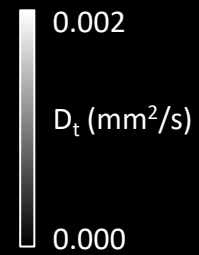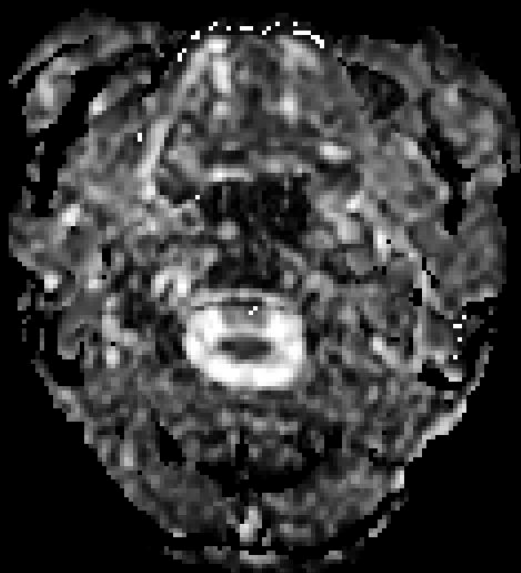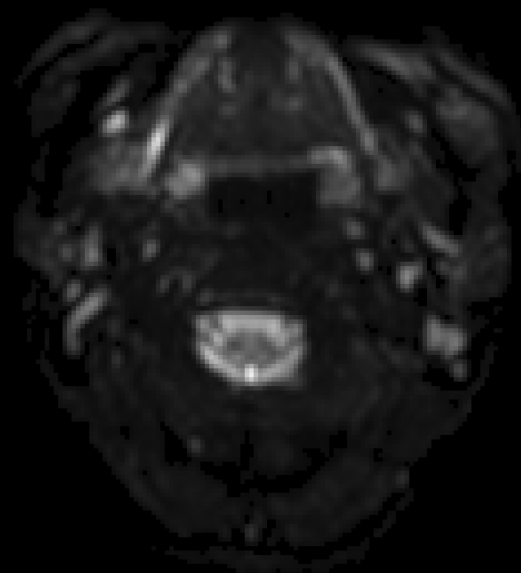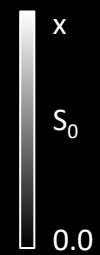

# Network instance 3

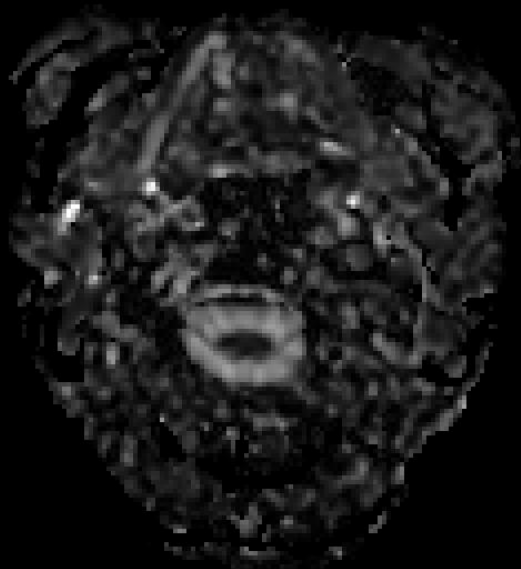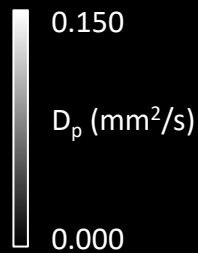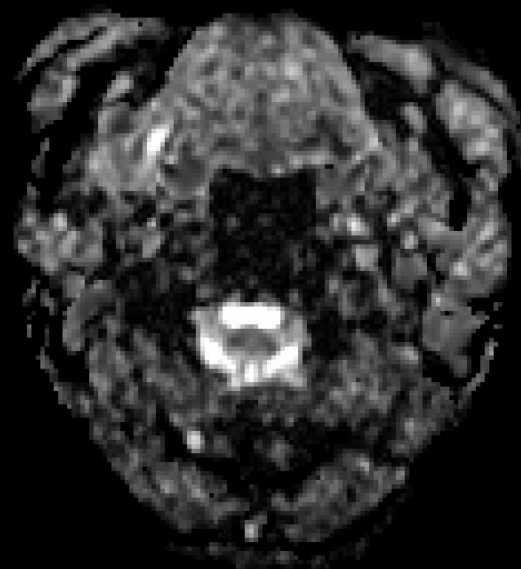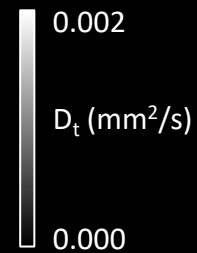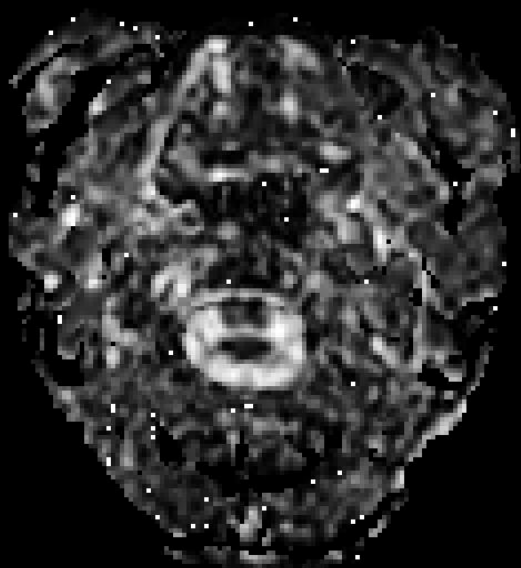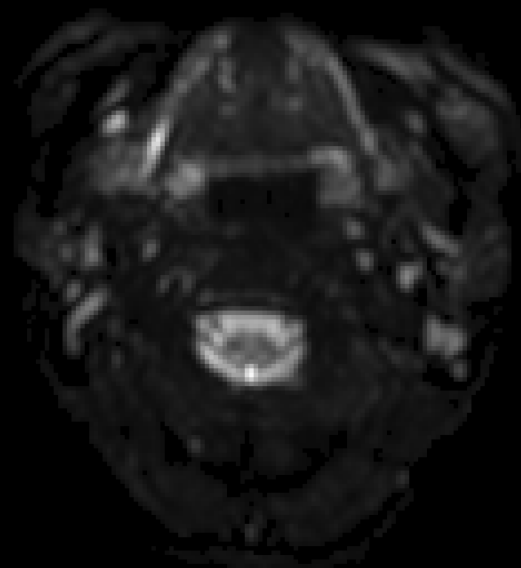



# Network instance 4

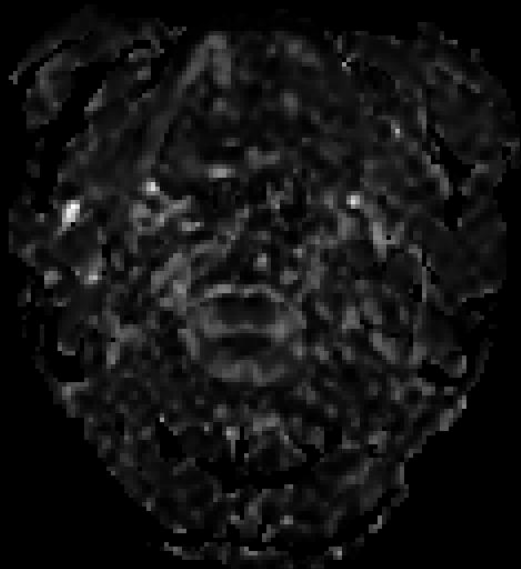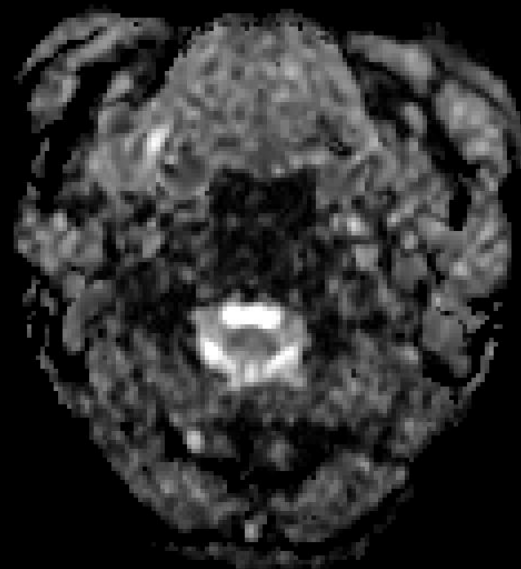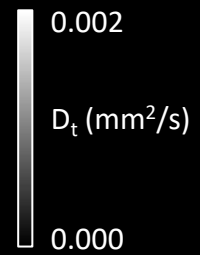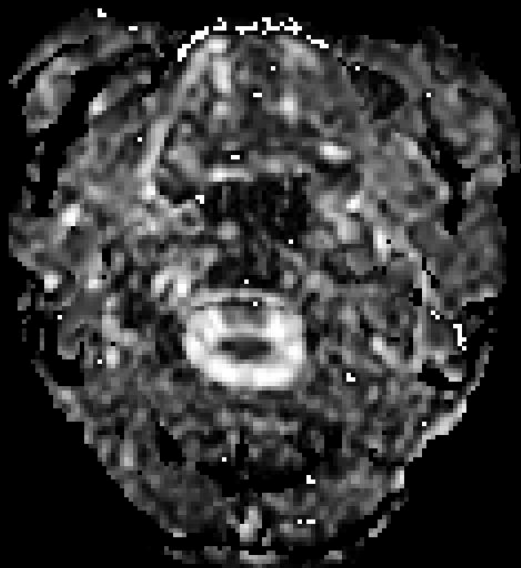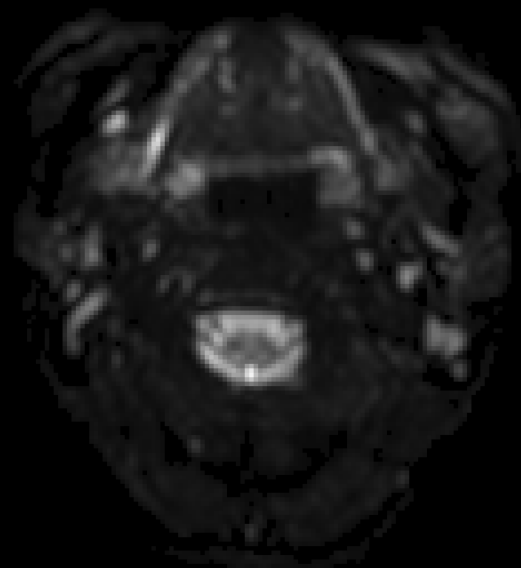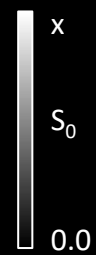

# Network instance 5

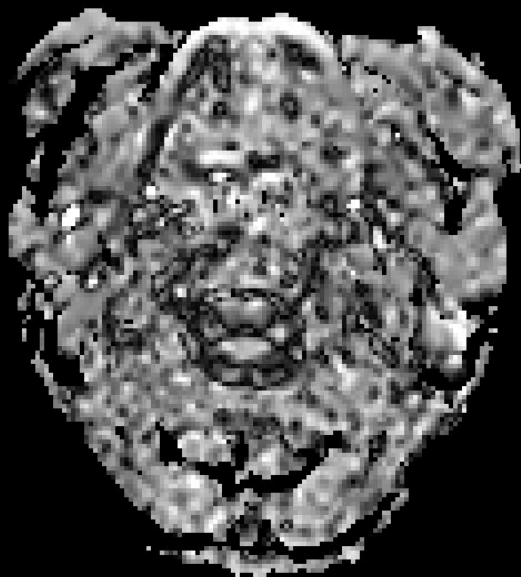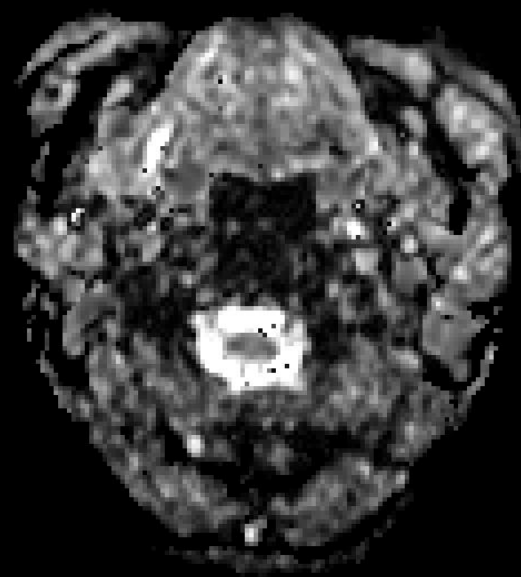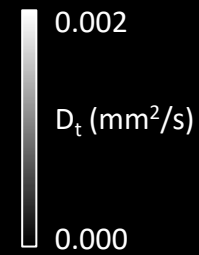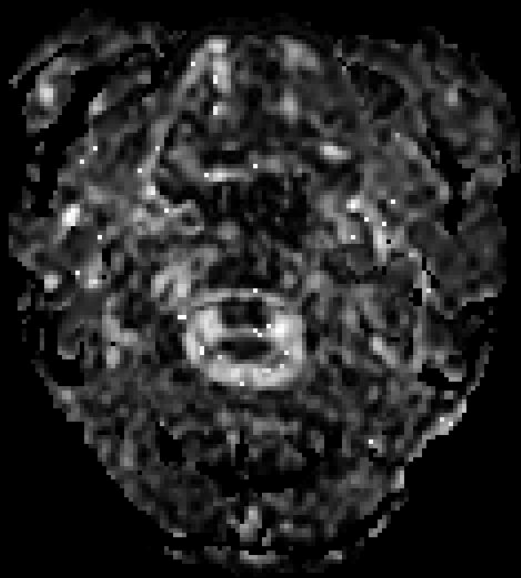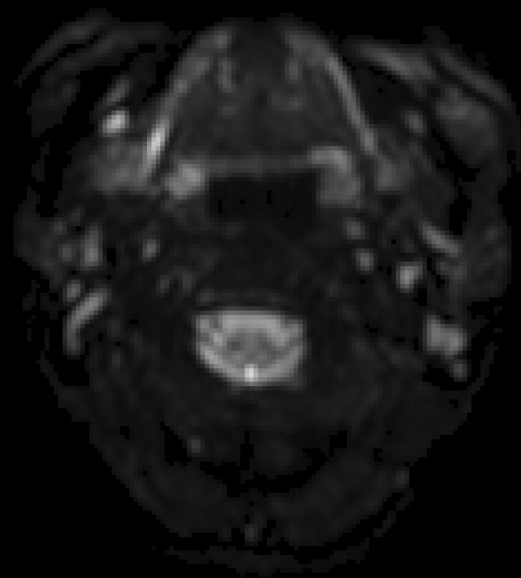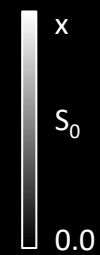

# Network instance 6

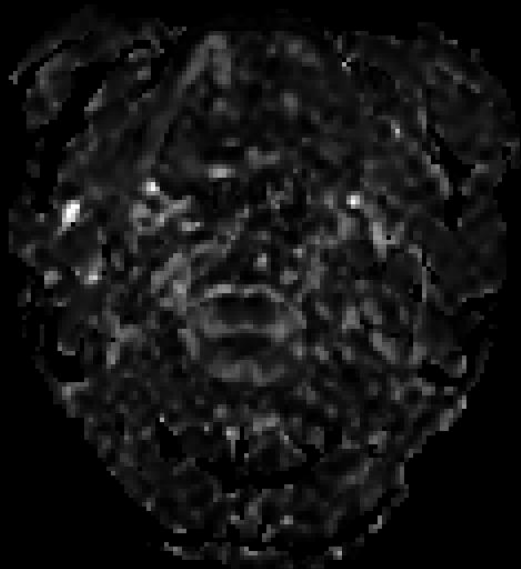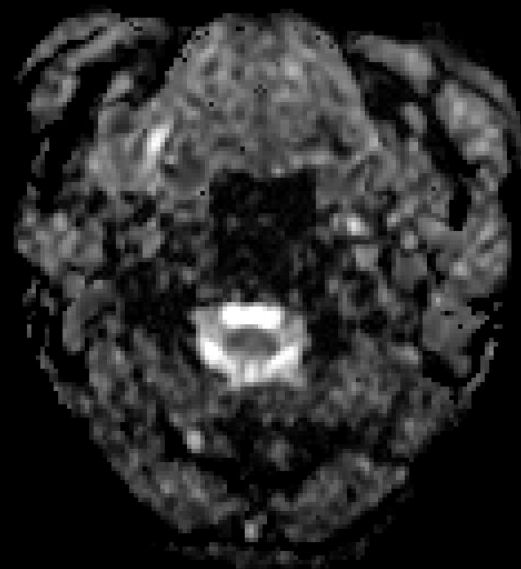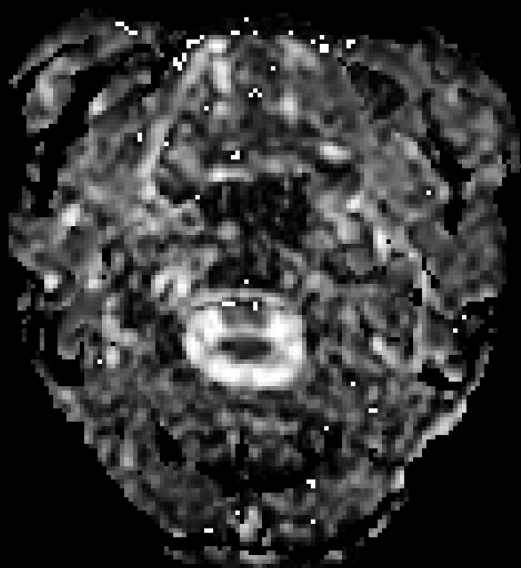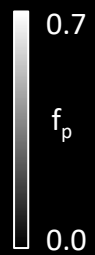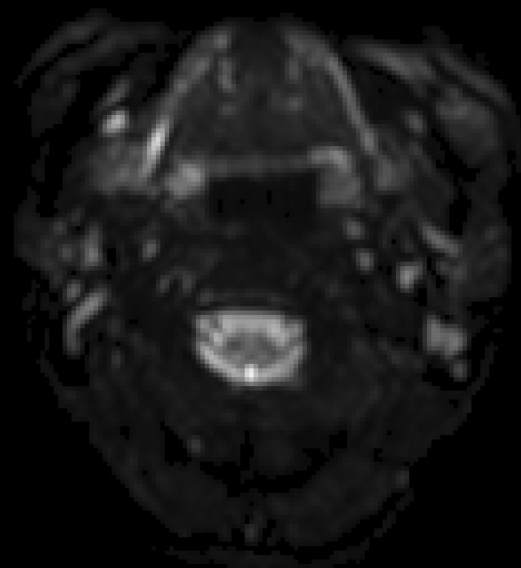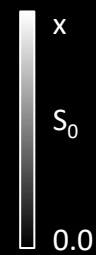

# Network instance 7

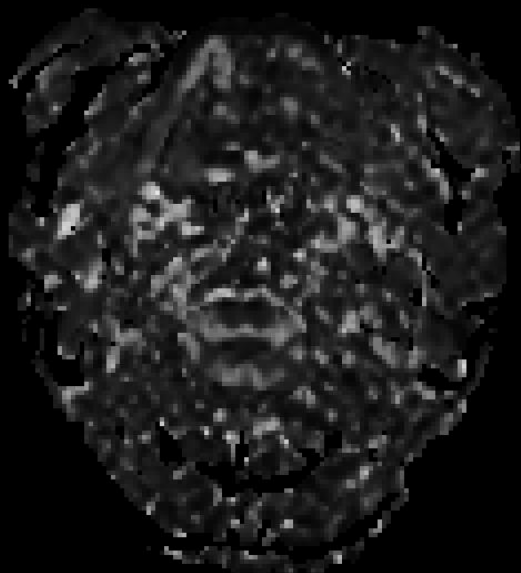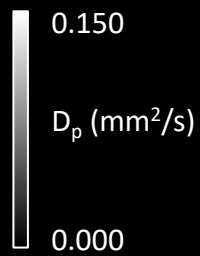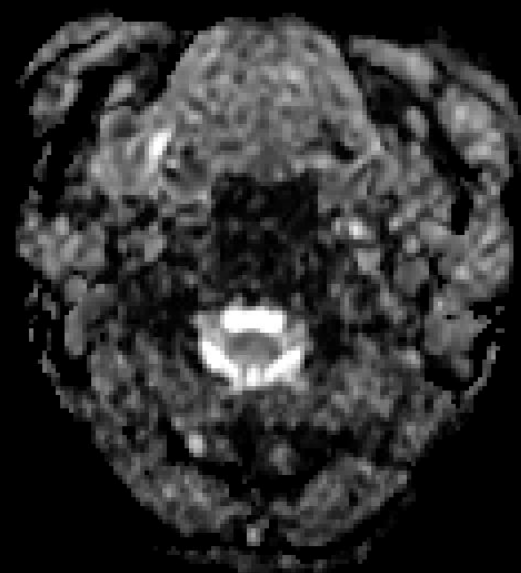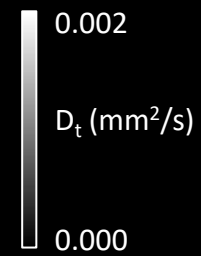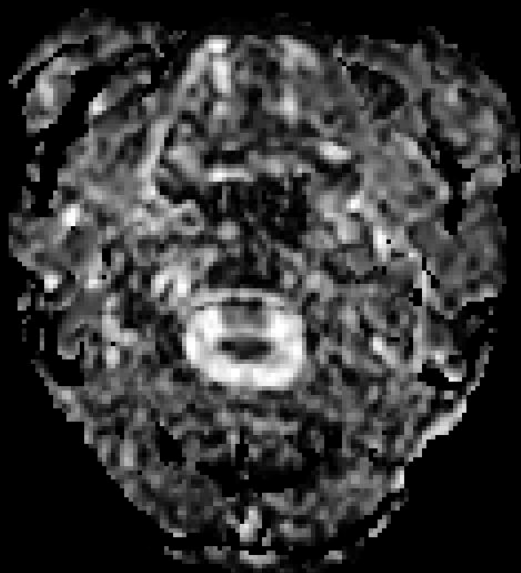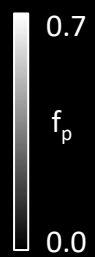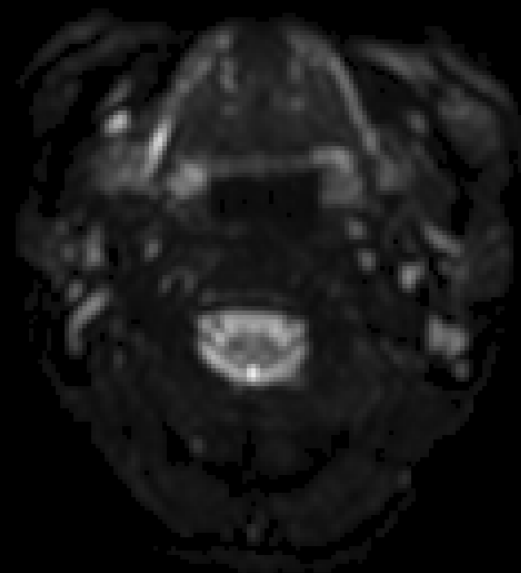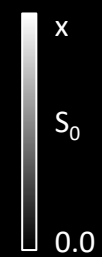

# Network instance 8

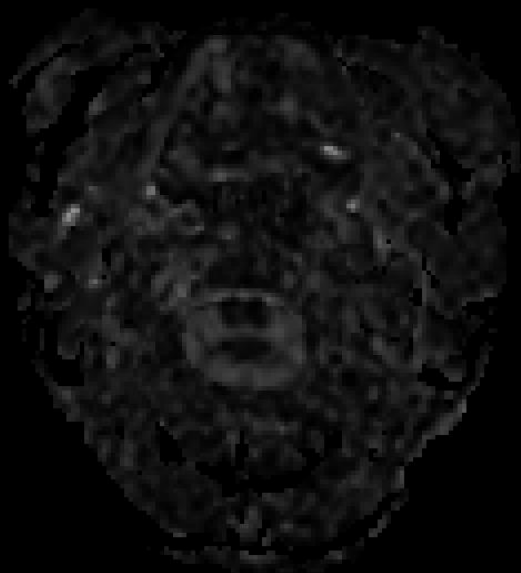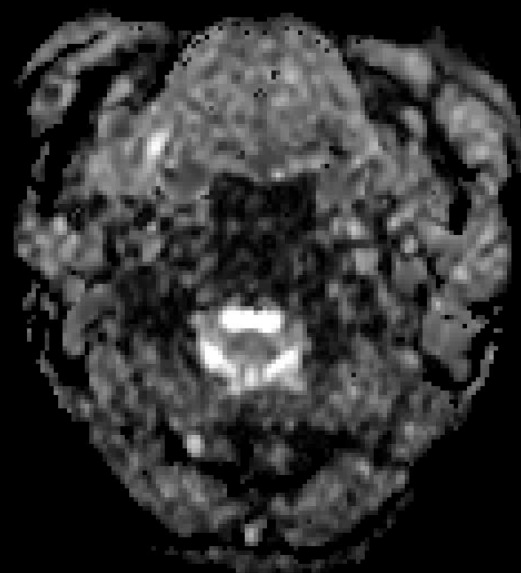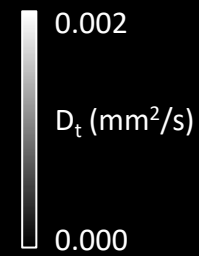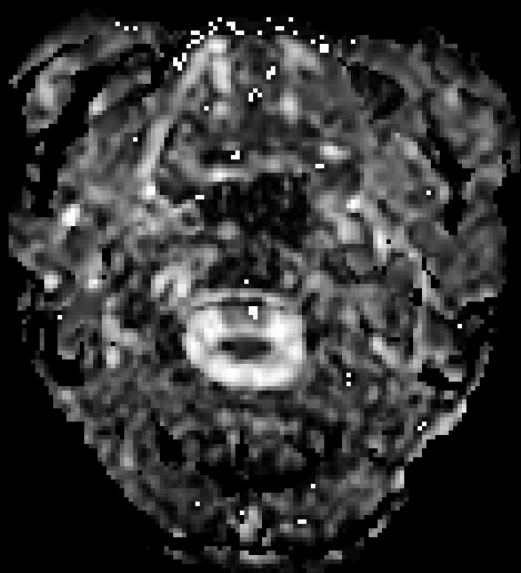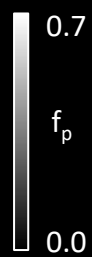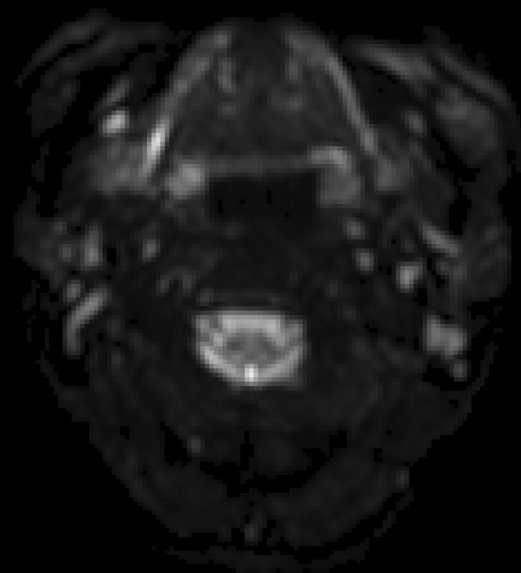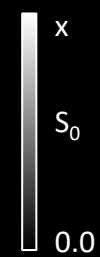

# Network instance 9

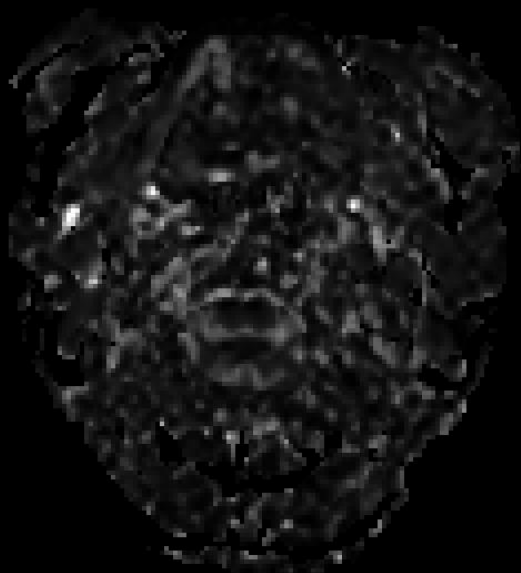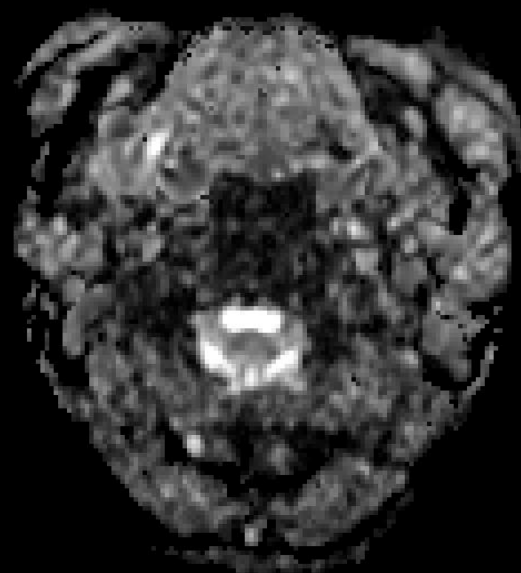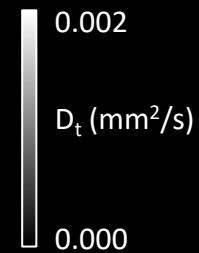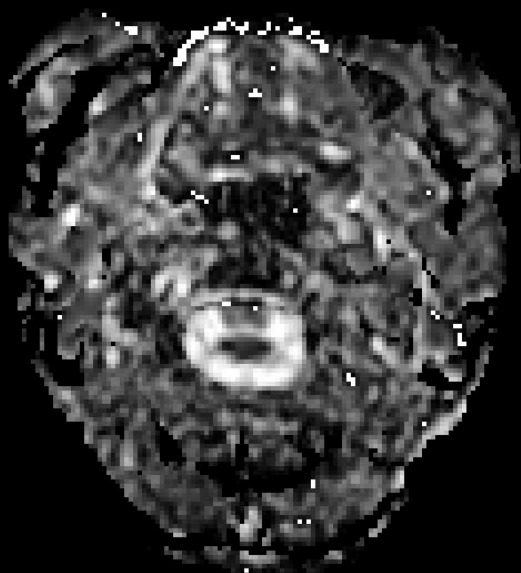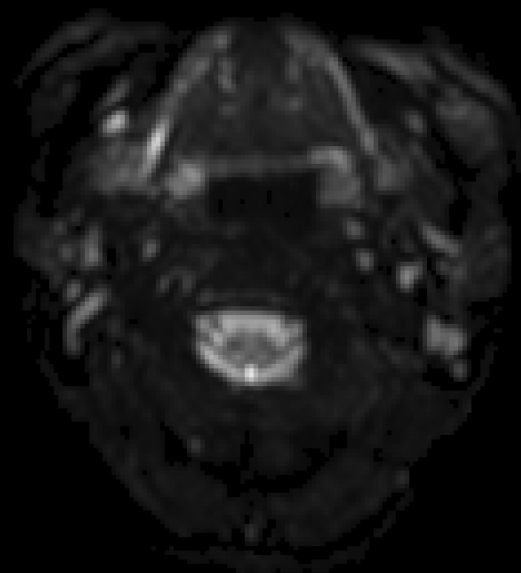

# Network instance 10

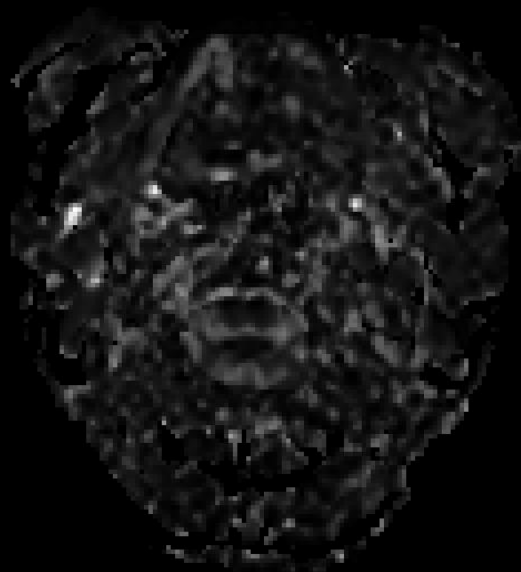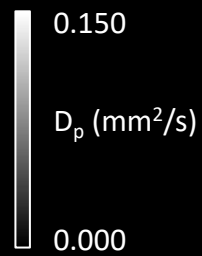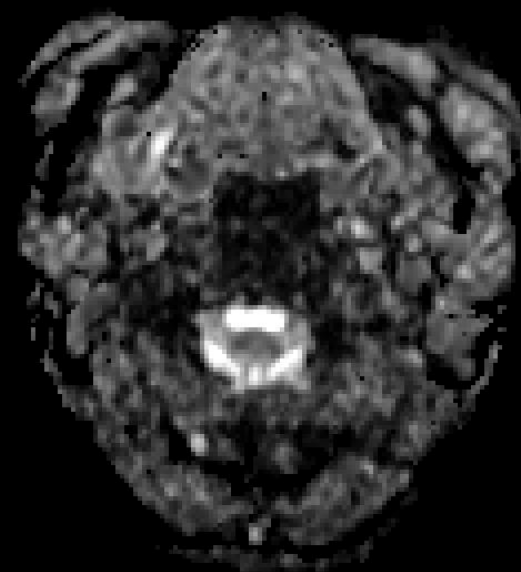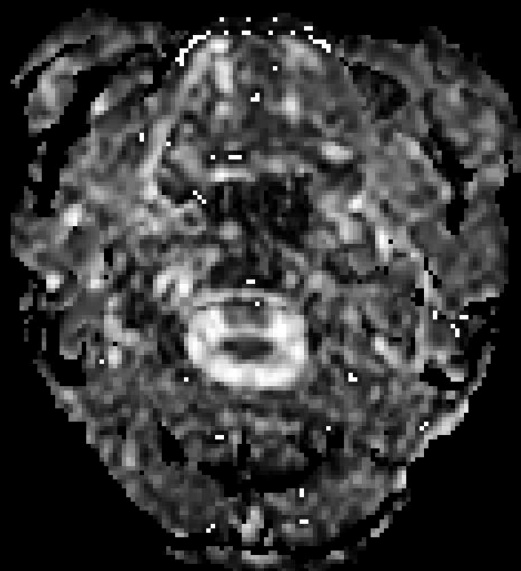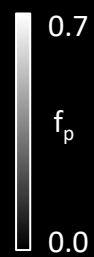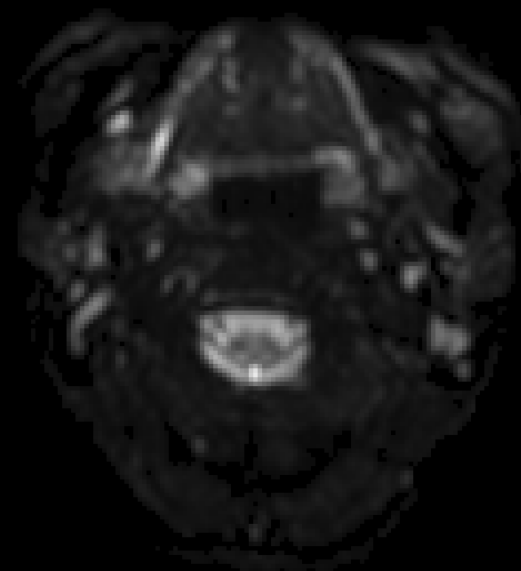

# Network instance 11

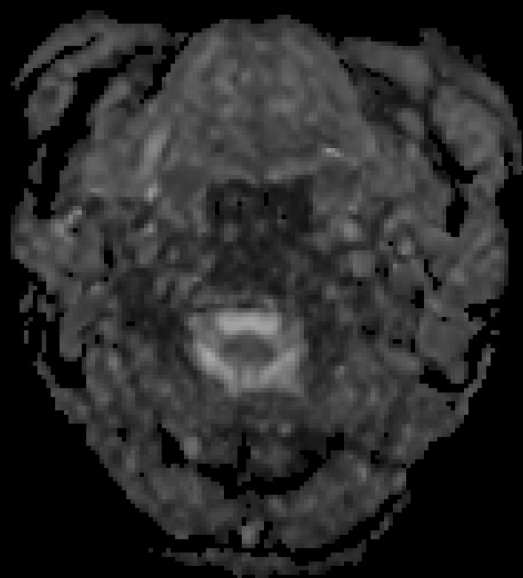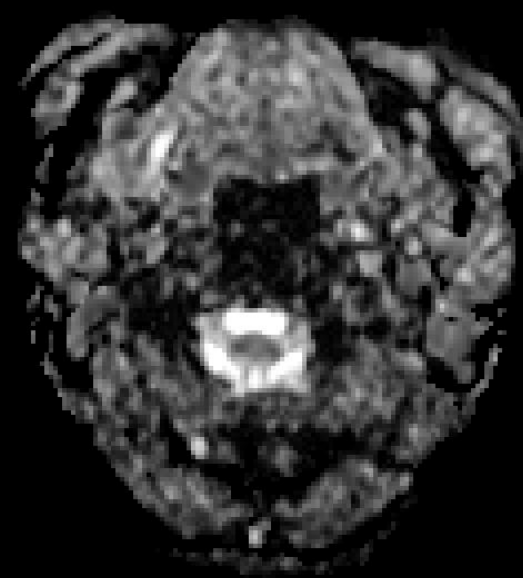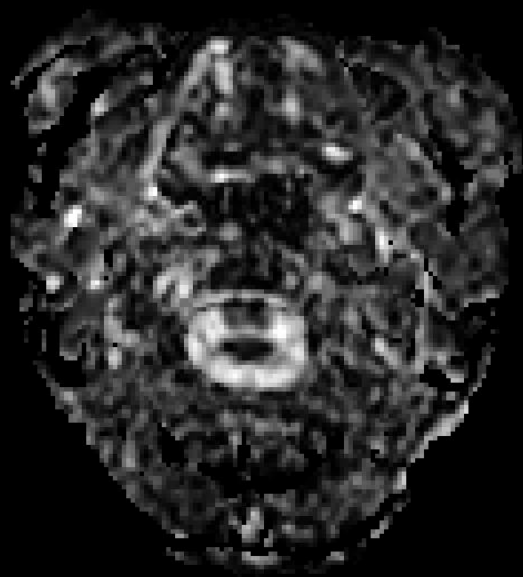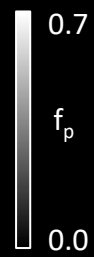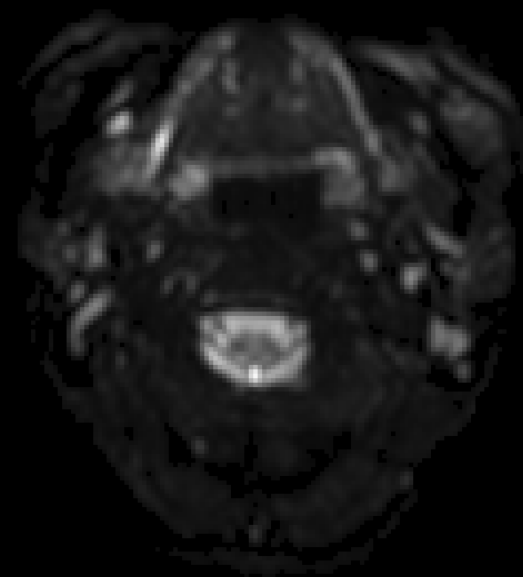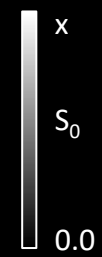



# Network instance 12

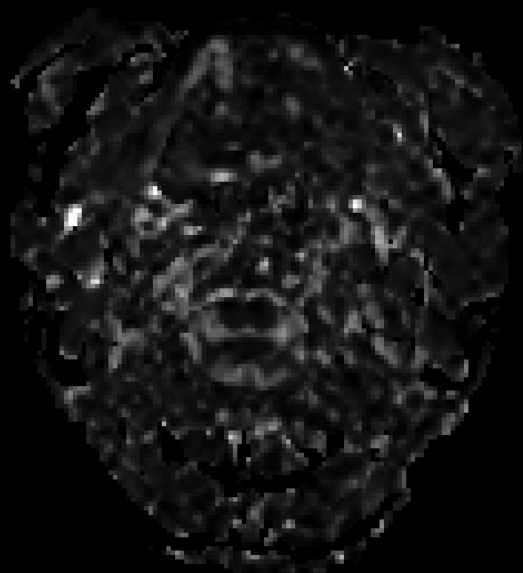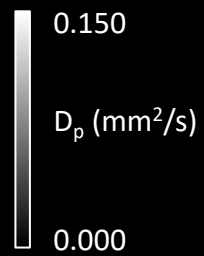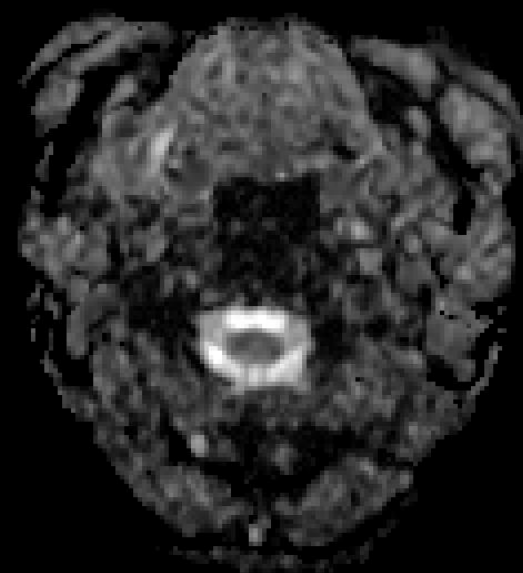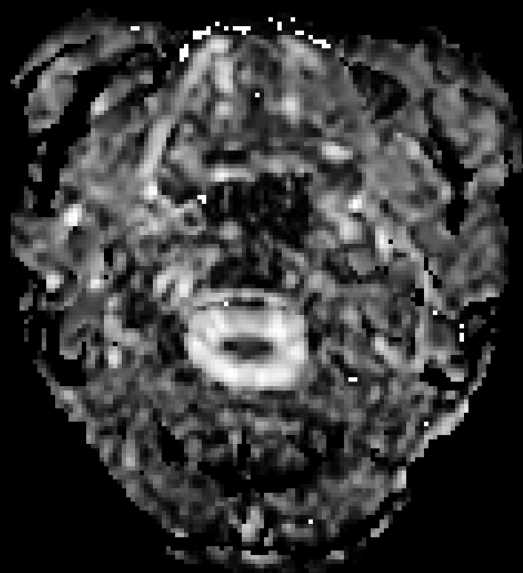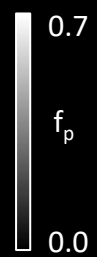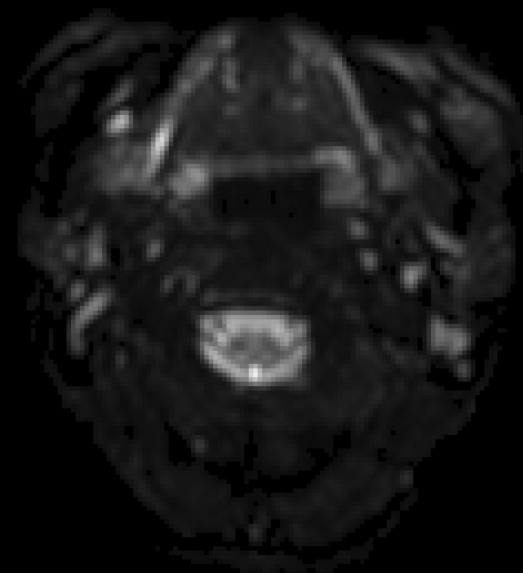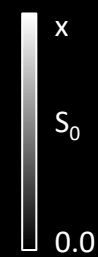

# Network instance 13

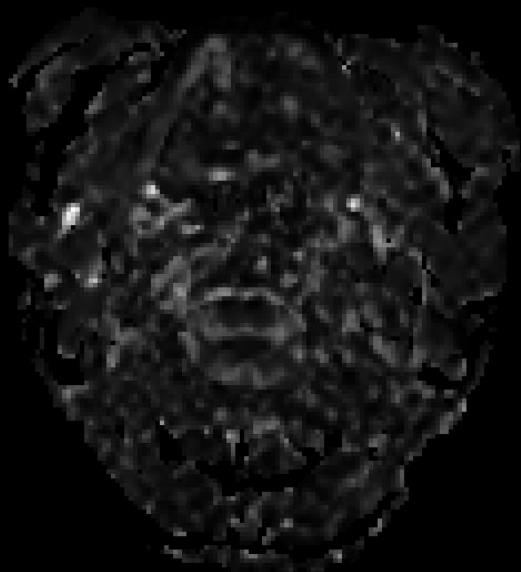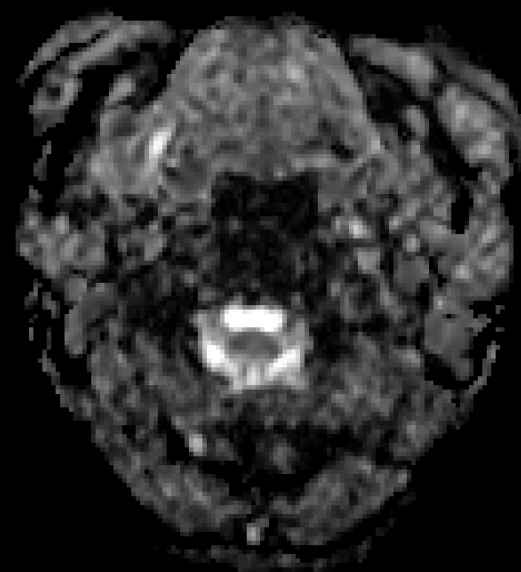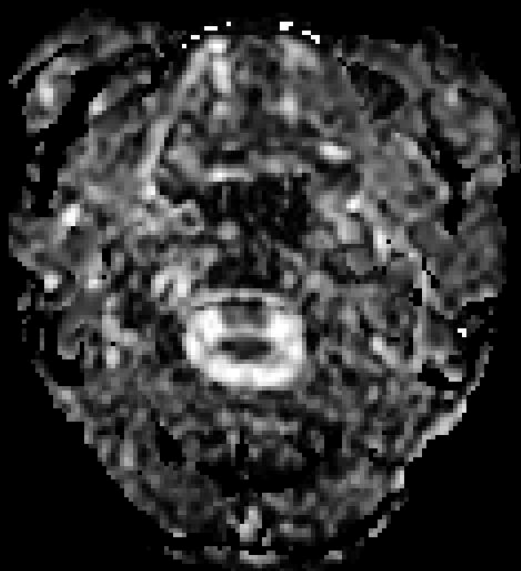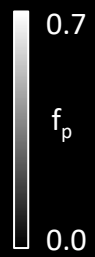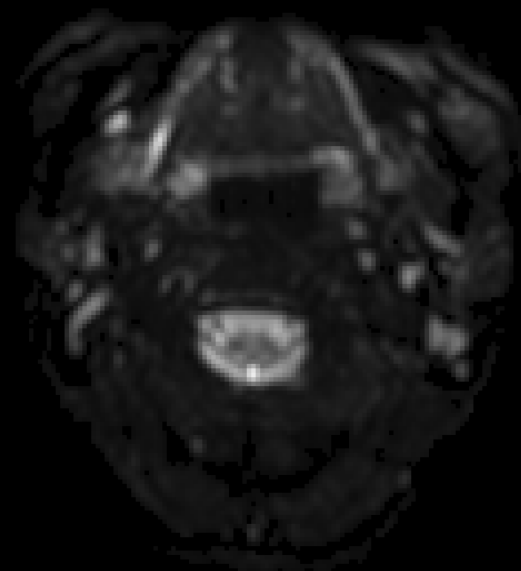

# Network instance 14

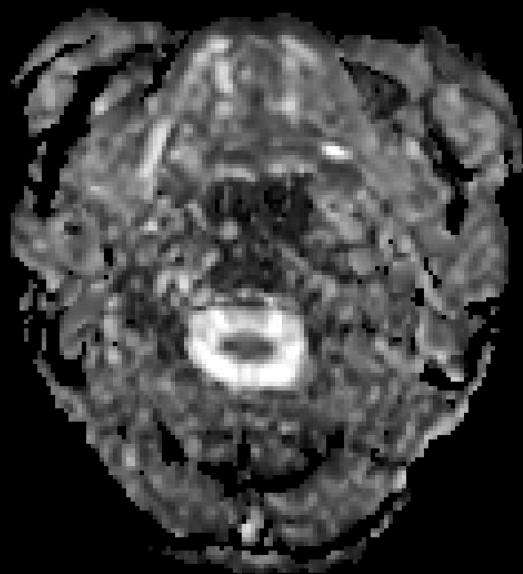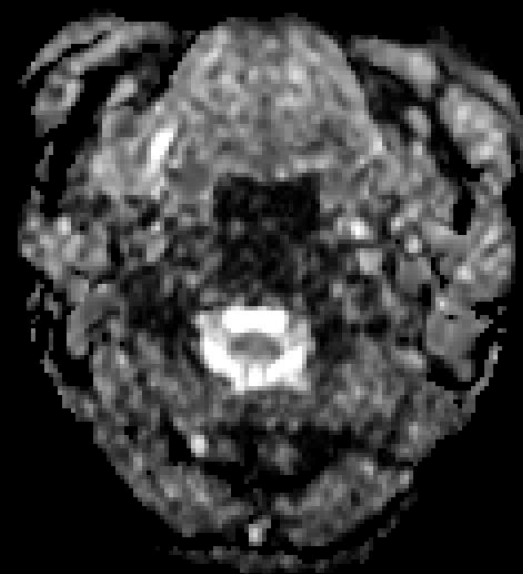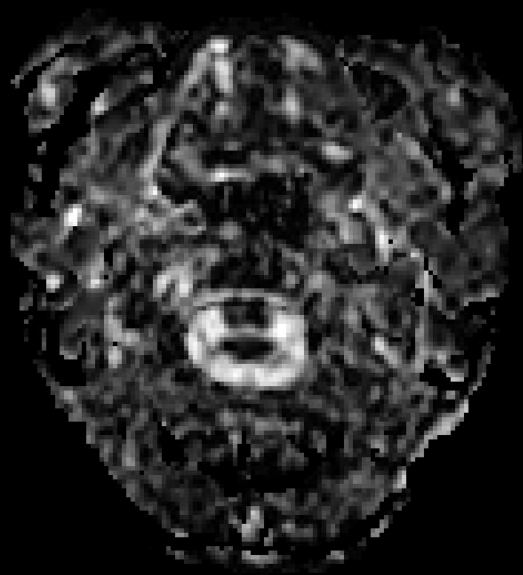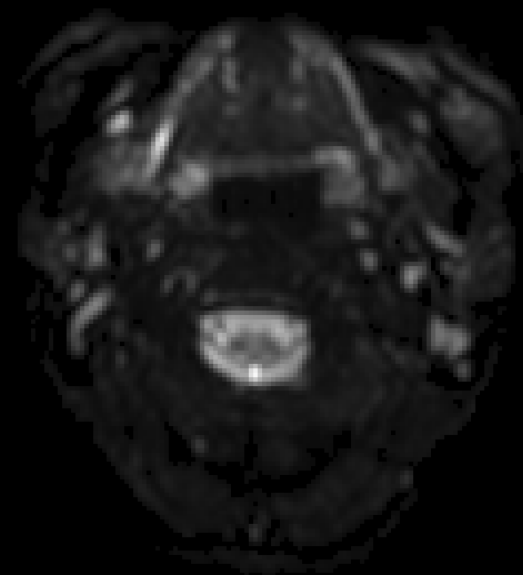

# Network instance 15

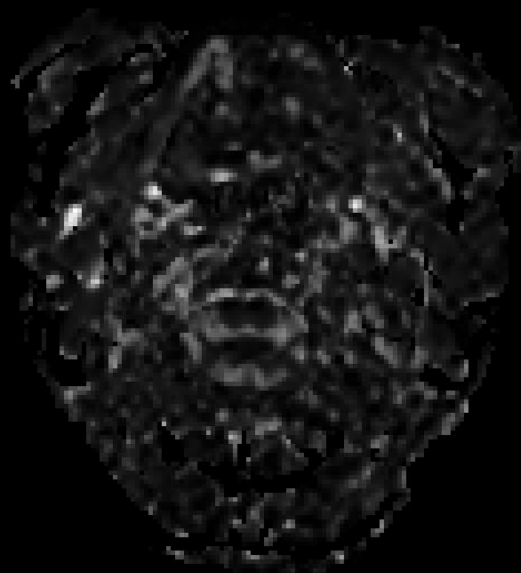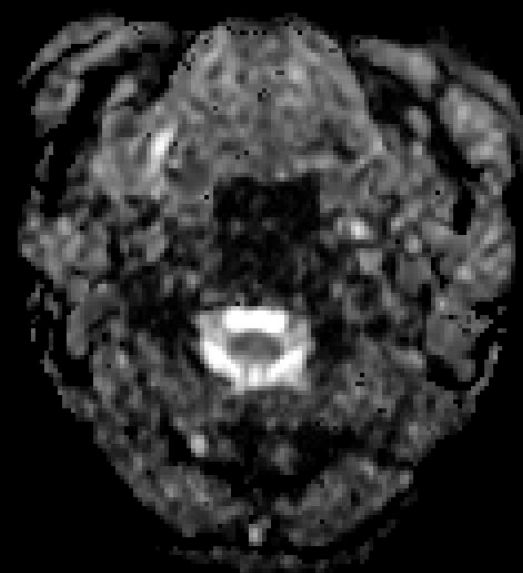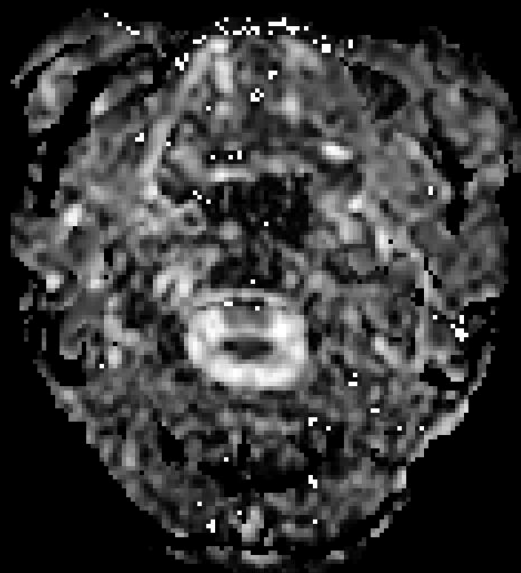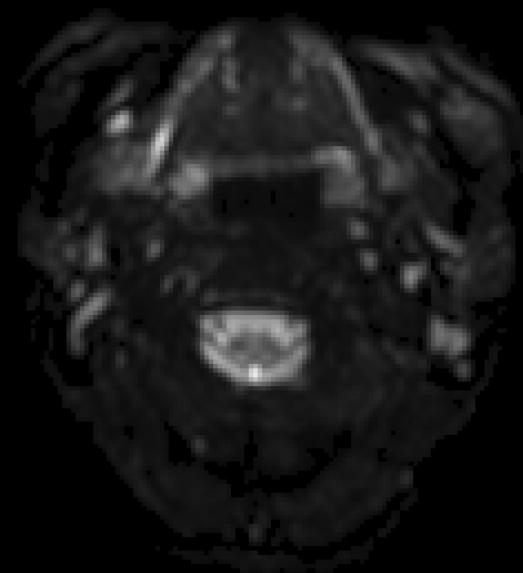

# Network instance 16

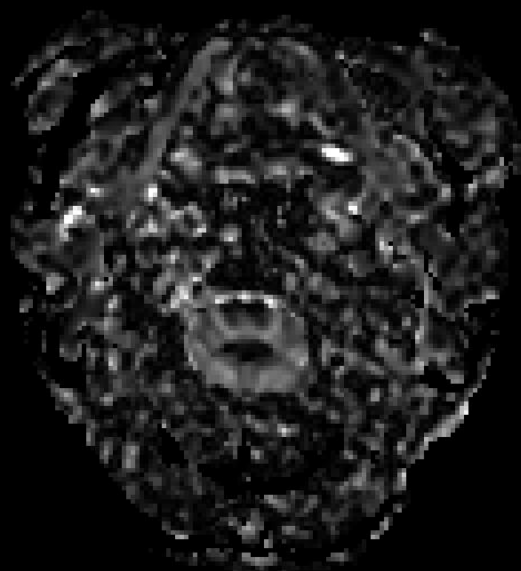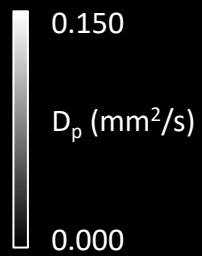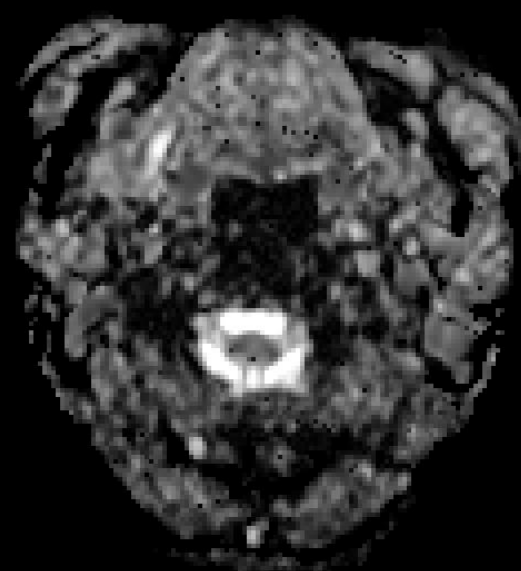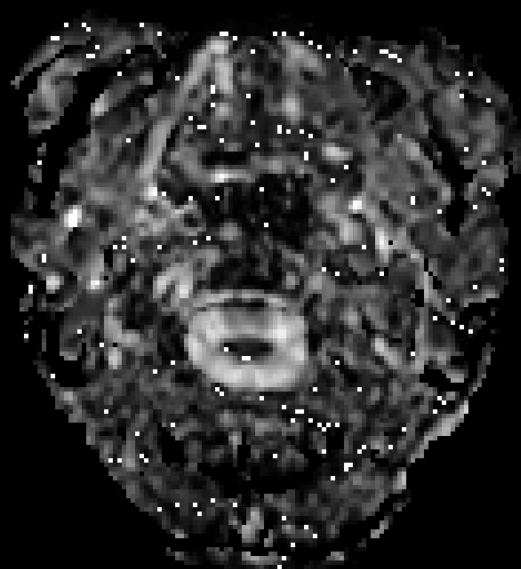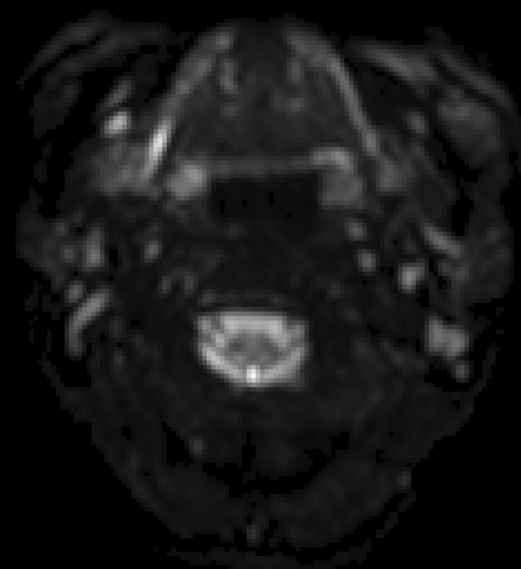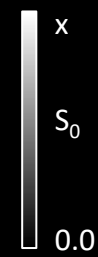

# Network instance 17

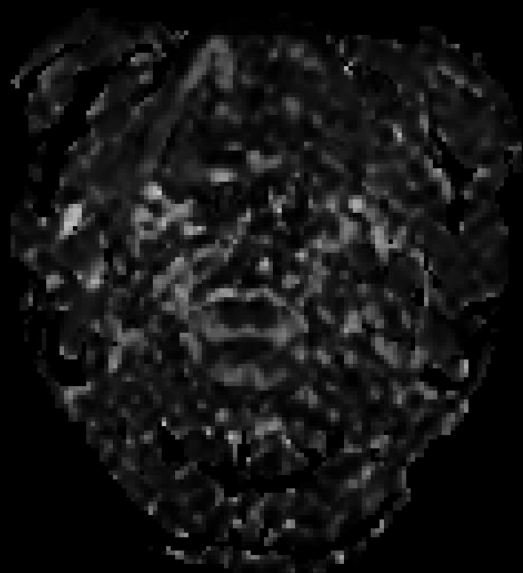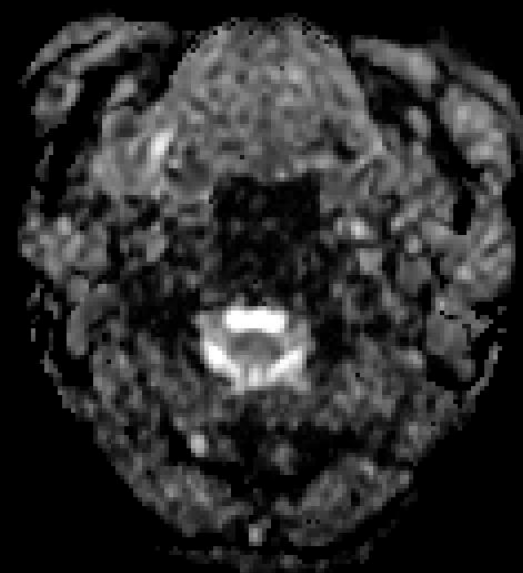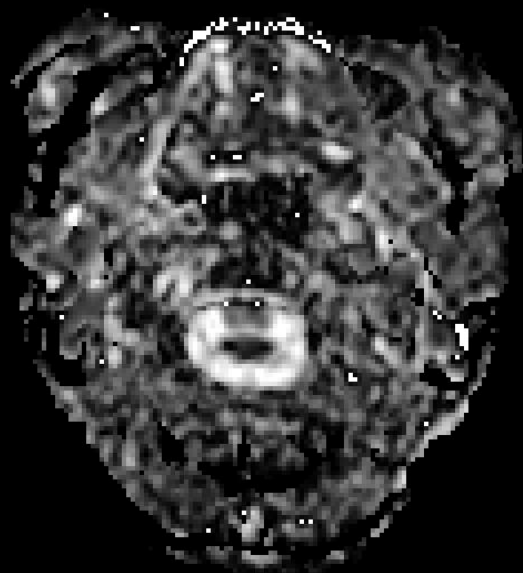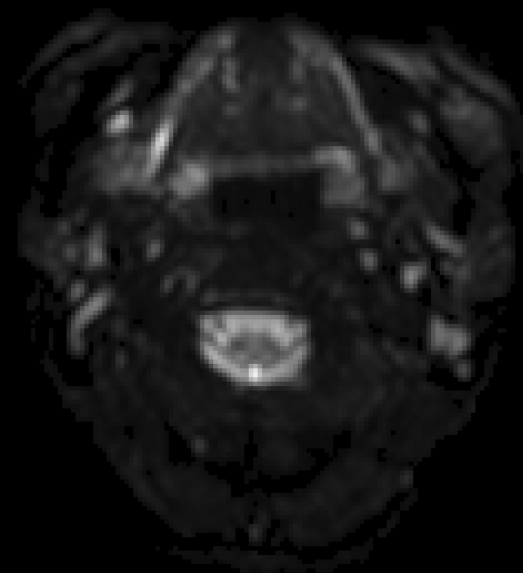

# Network instance 18

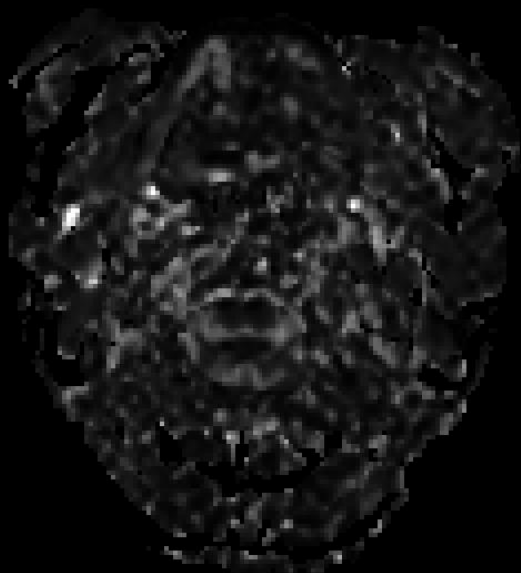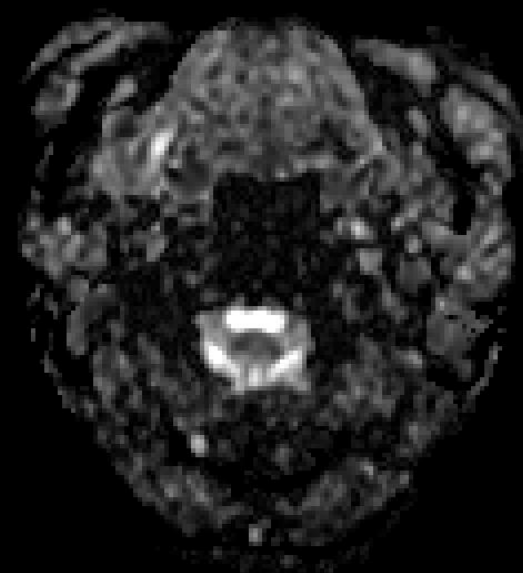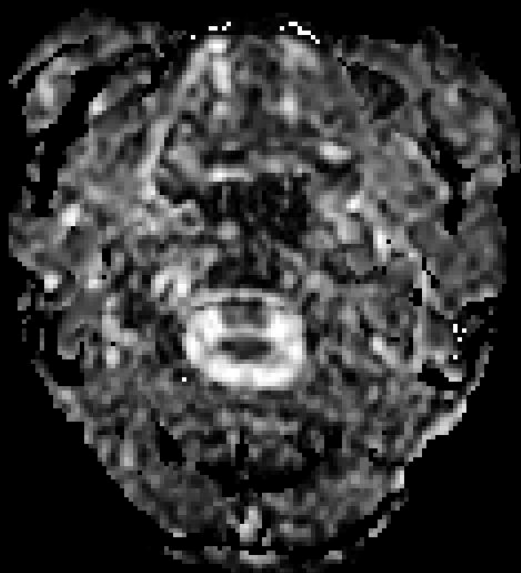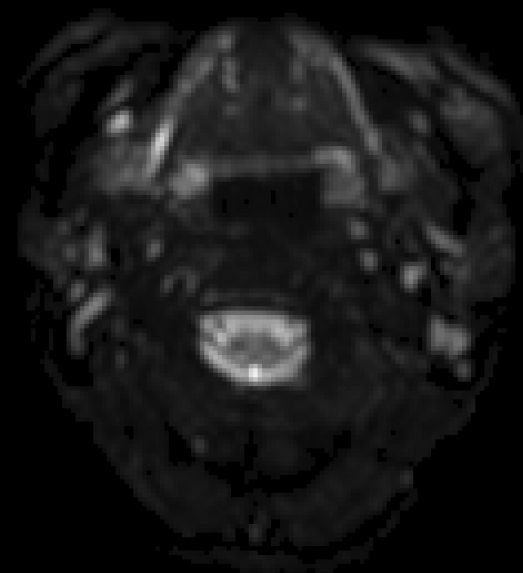

# Network instance 19

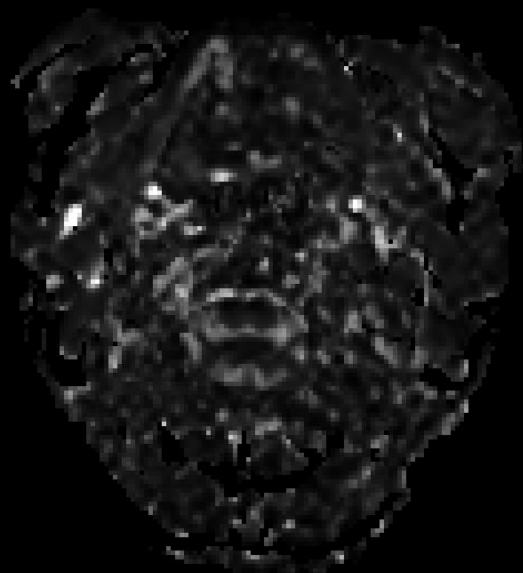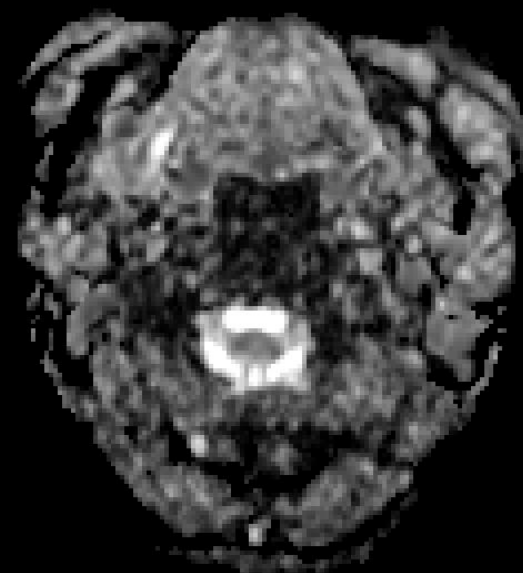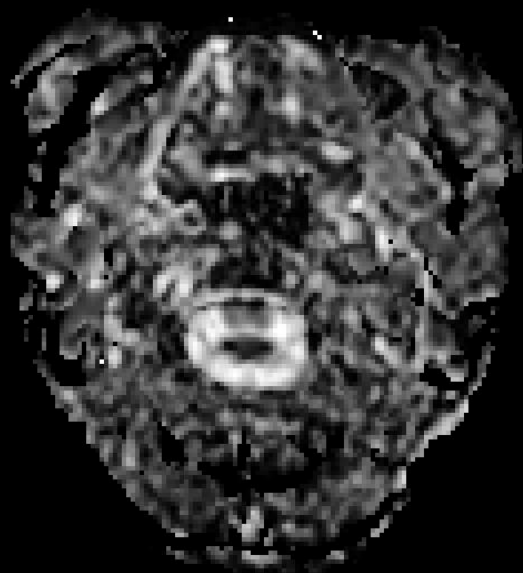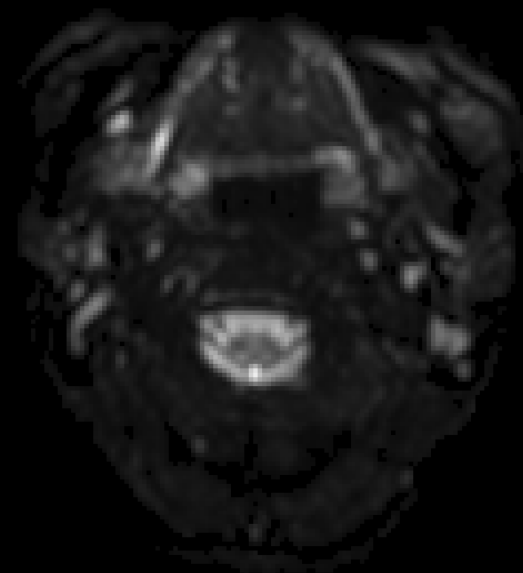



# Network instance 20

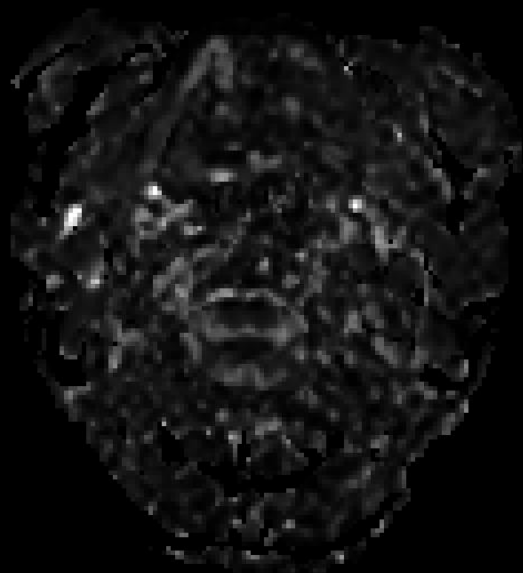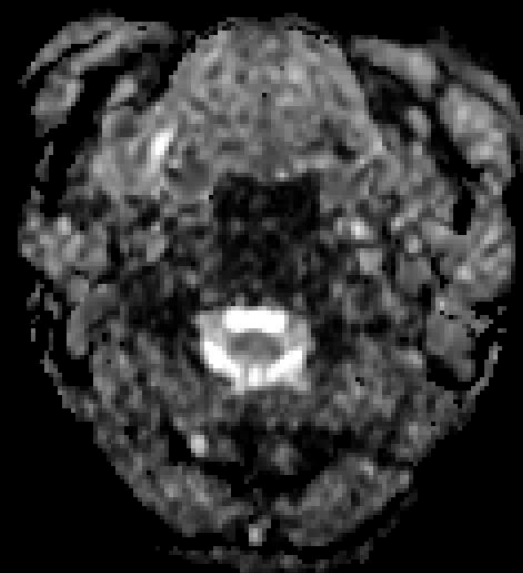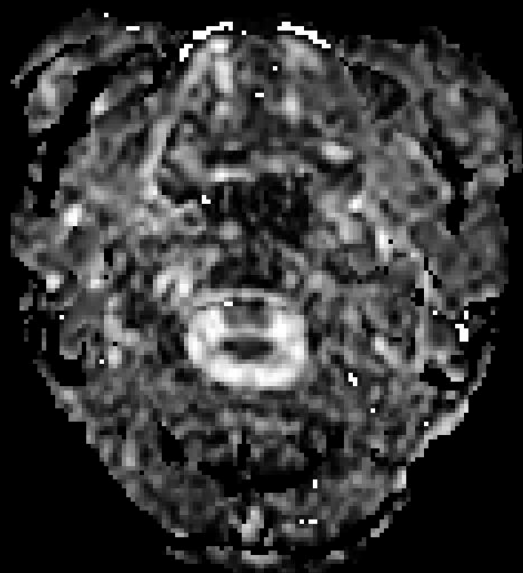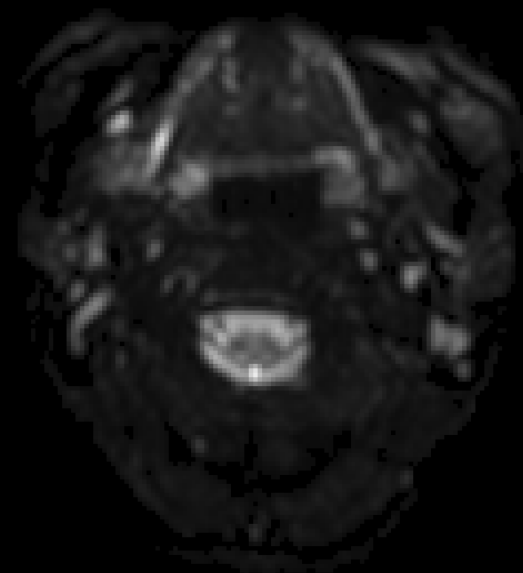

# Network instance 21

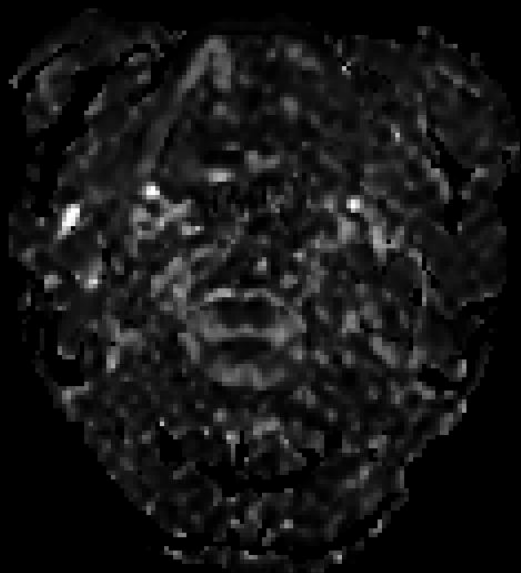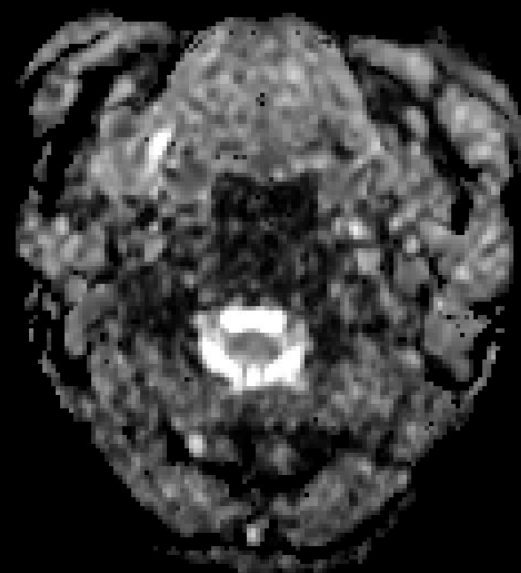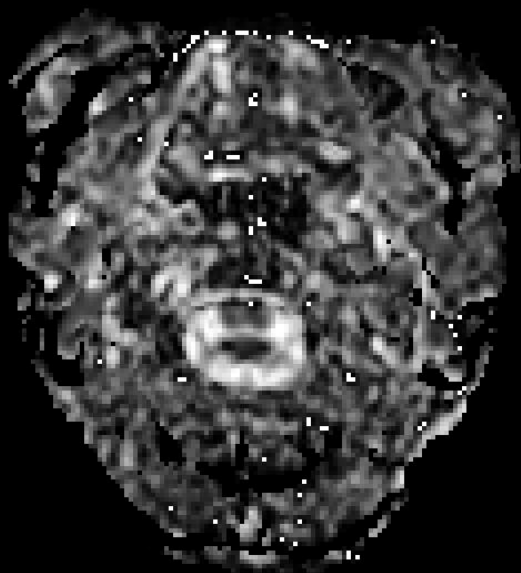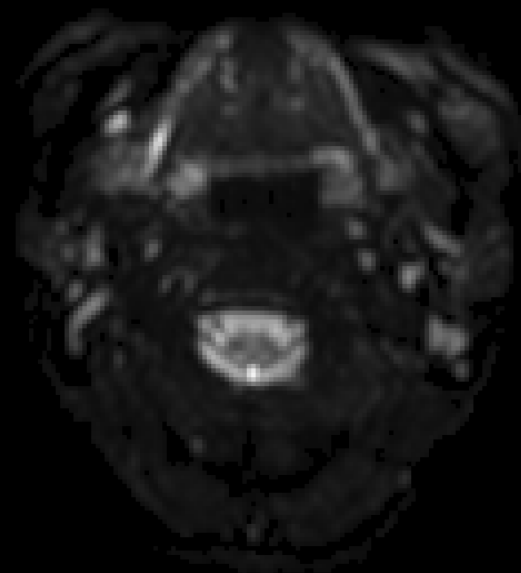

# Network instance 22

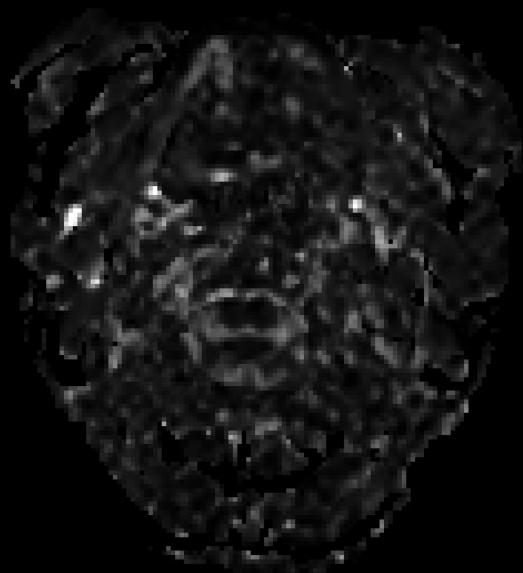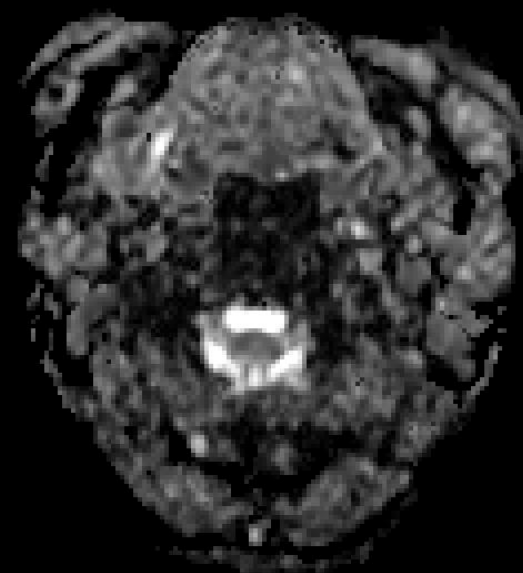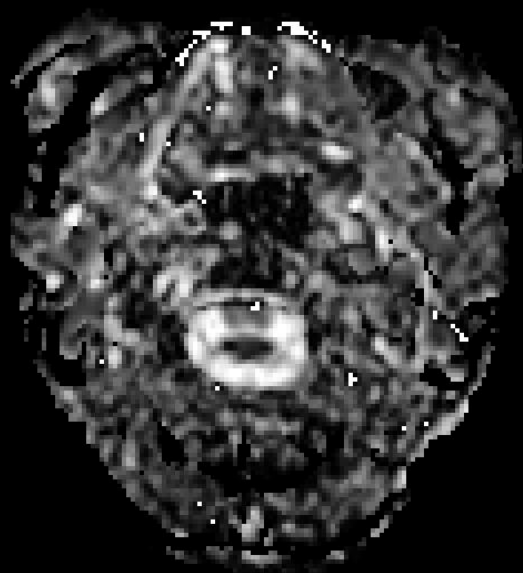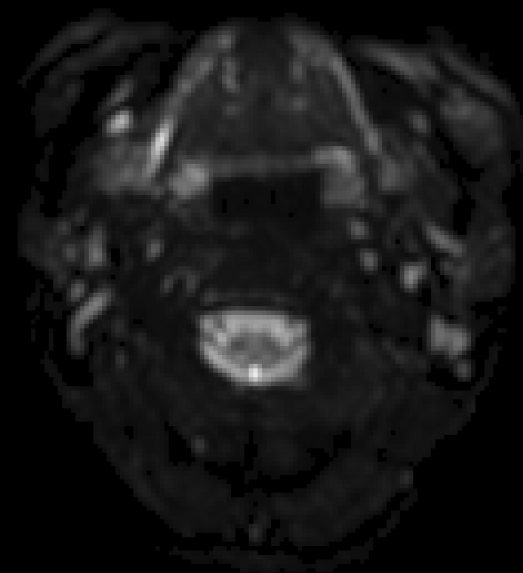

# Network instance 23

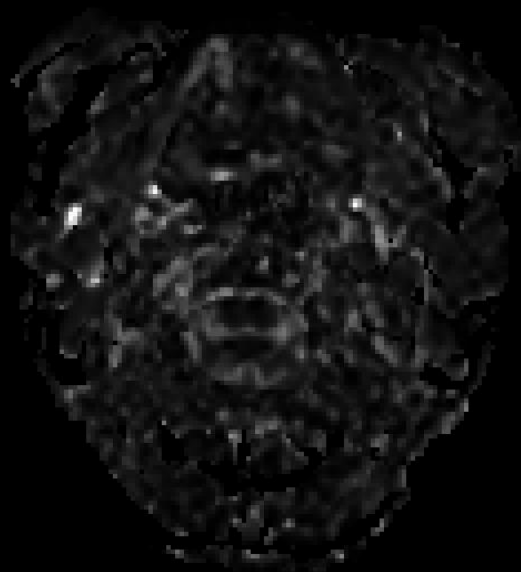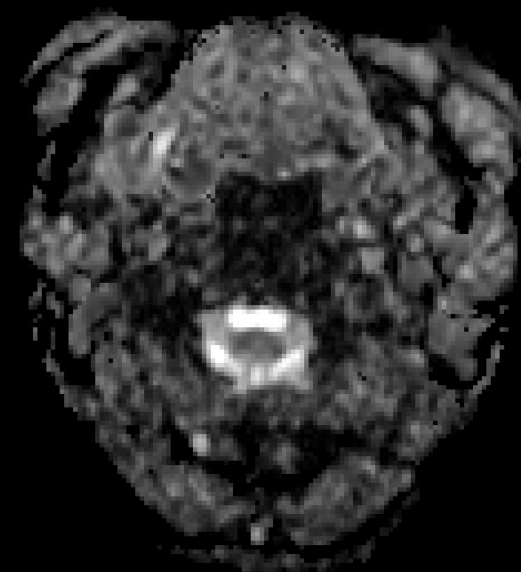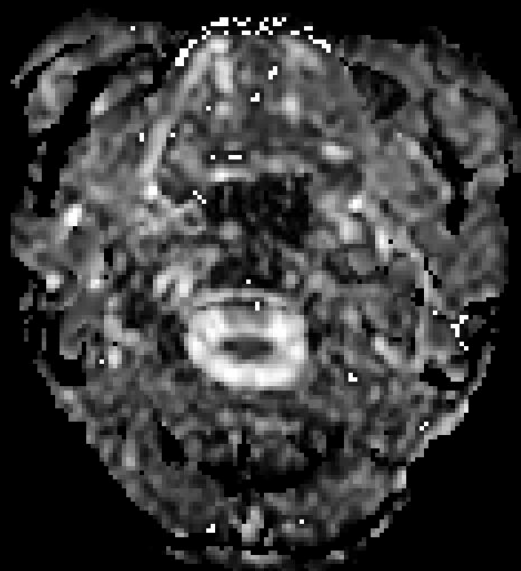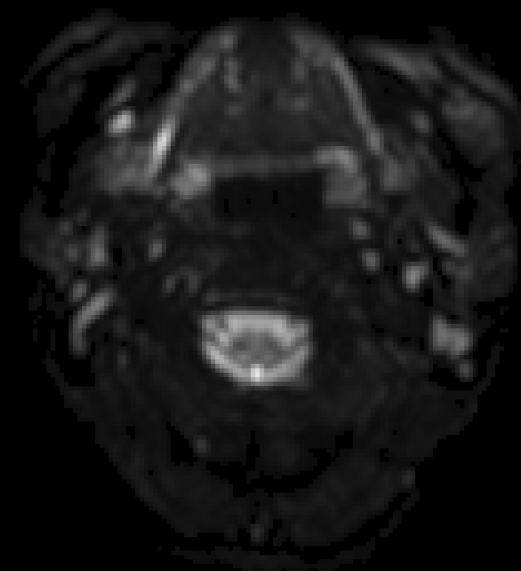

# Network instance 24

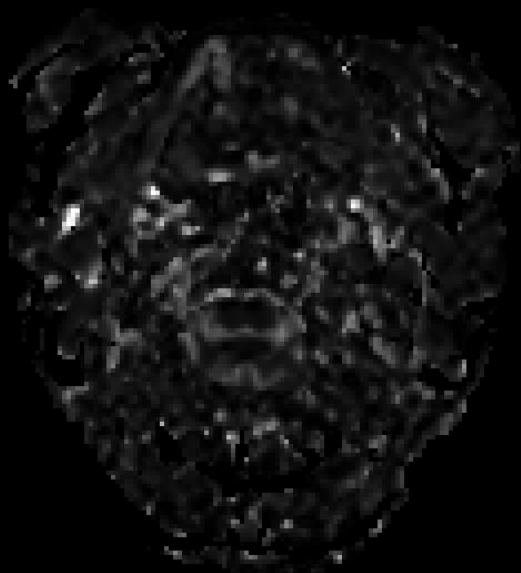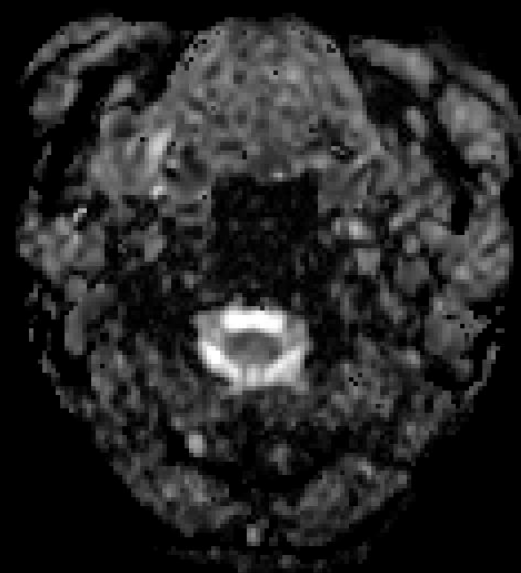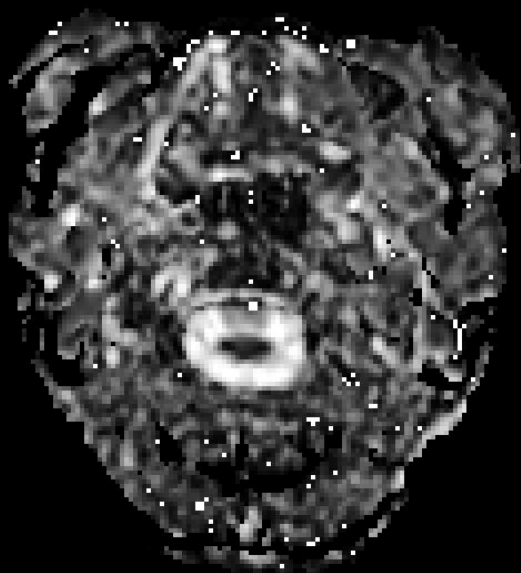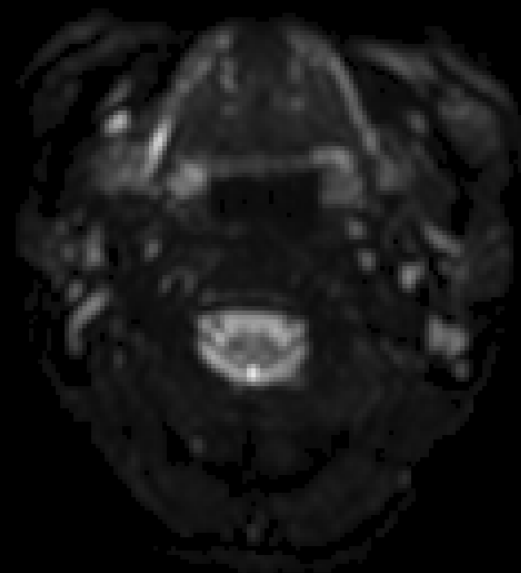

# Network instance 25

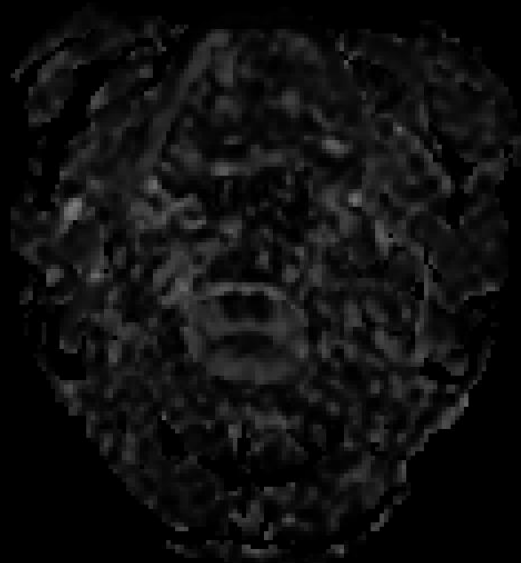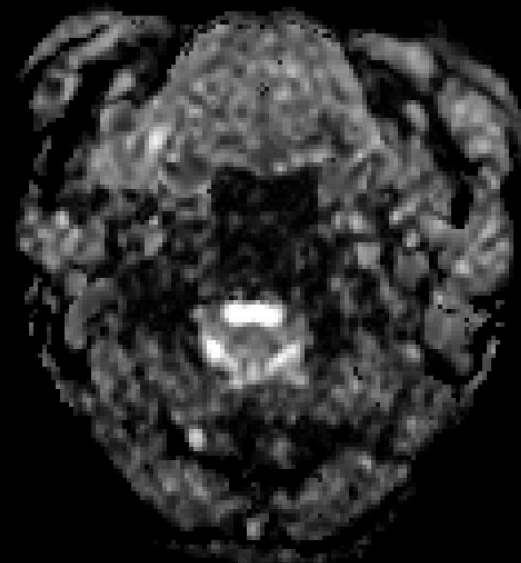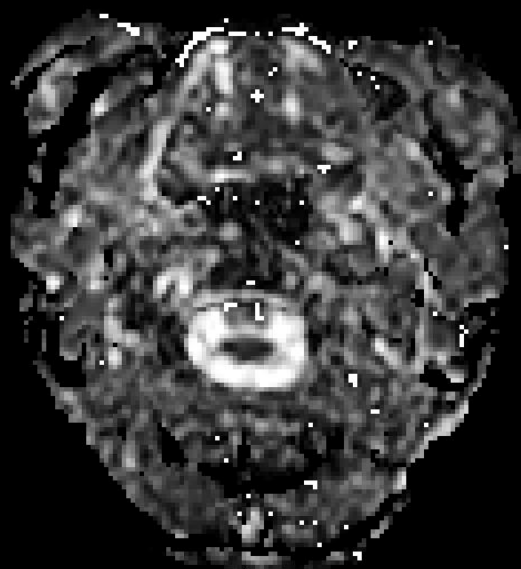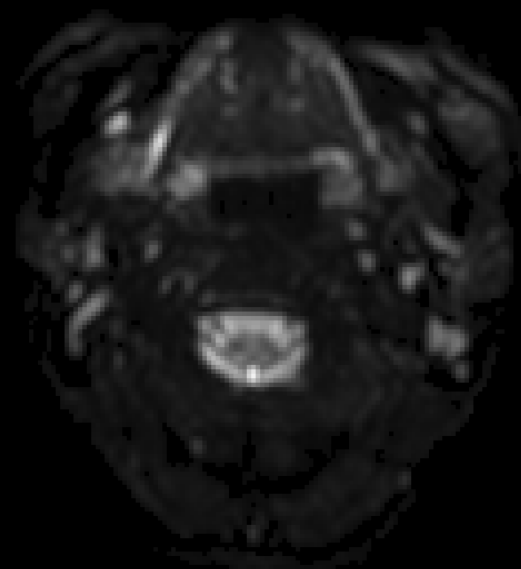

# Network instance 26

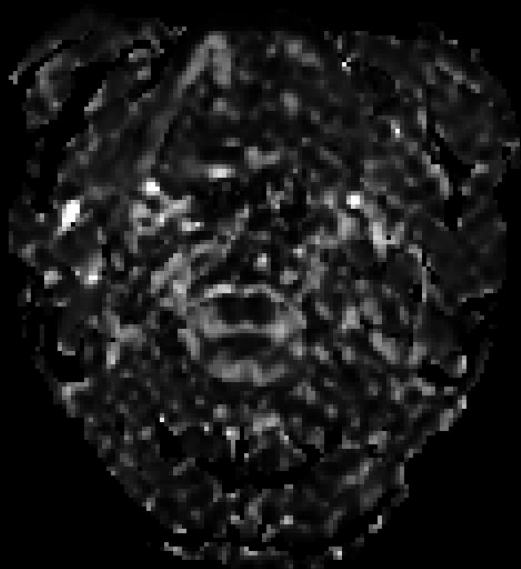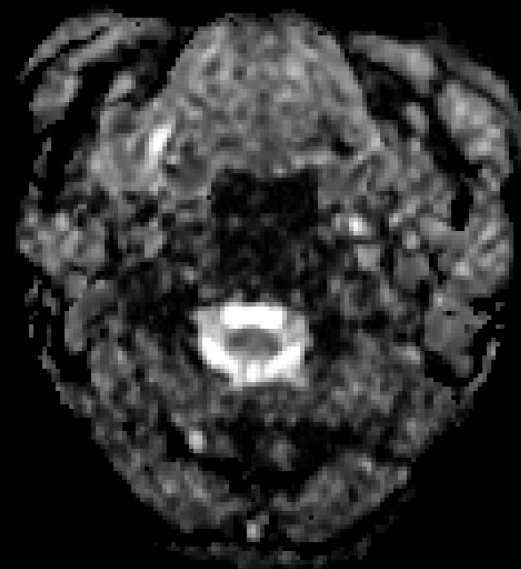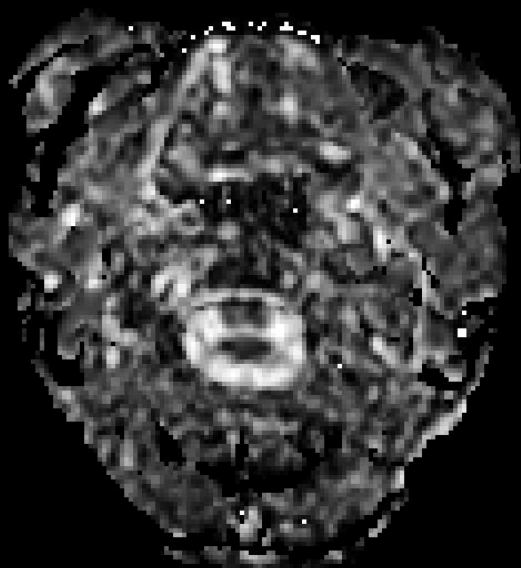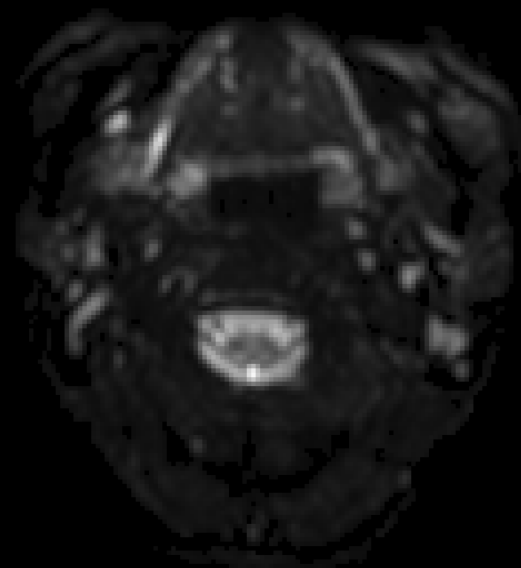

# Network instance 27

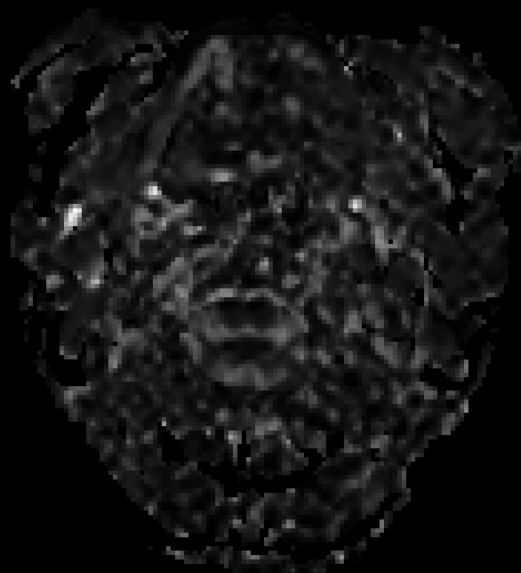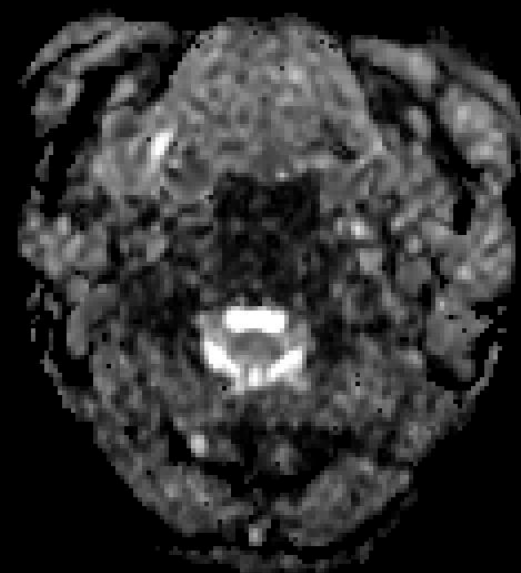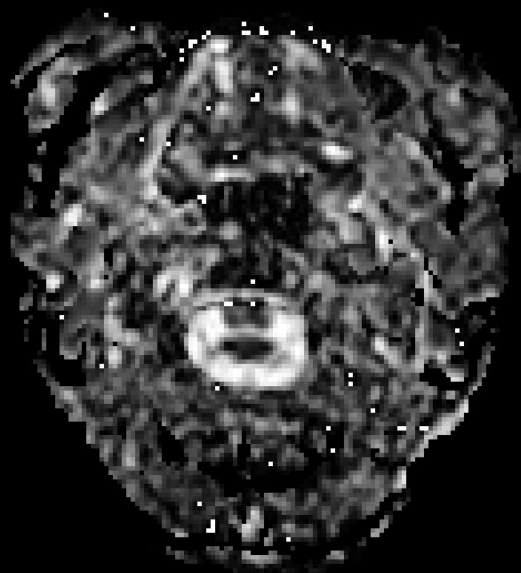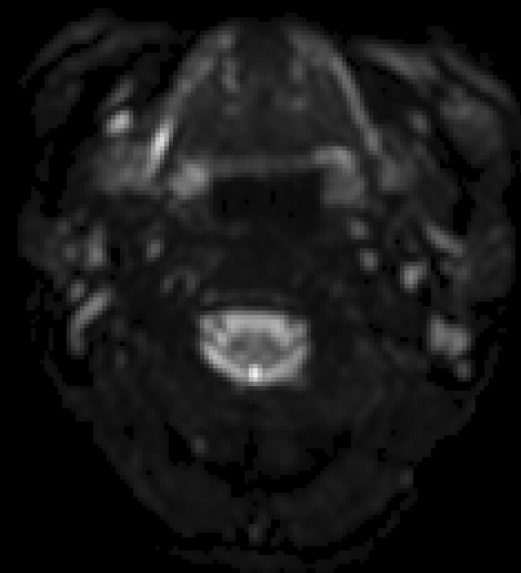



# Network instance 28

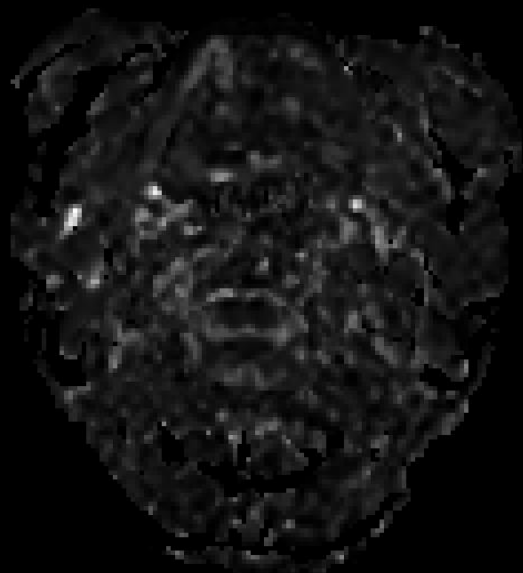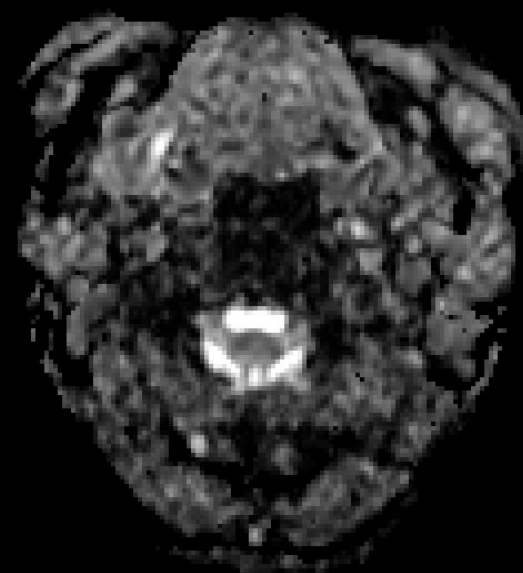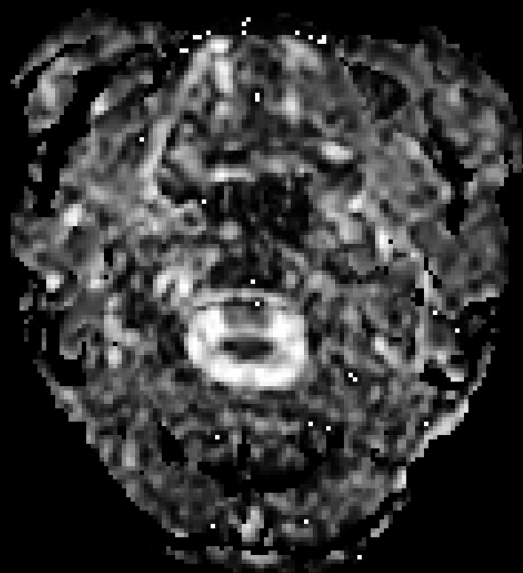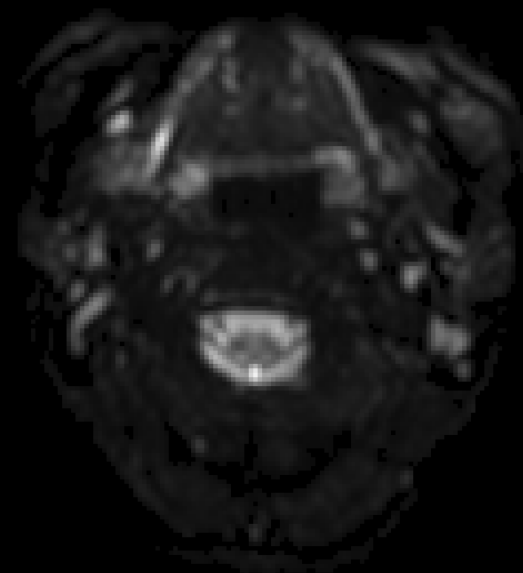

# Network instance 29

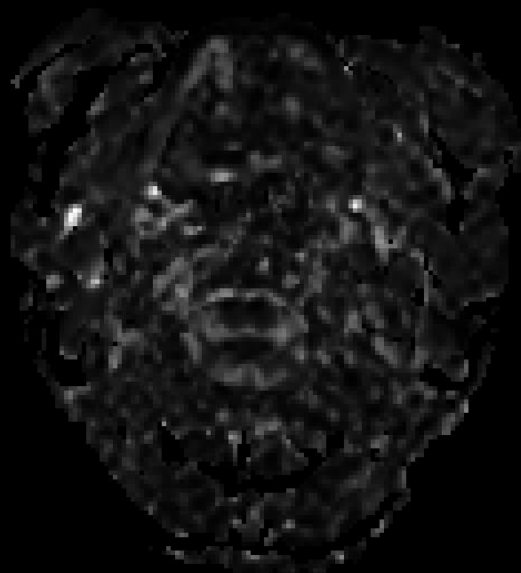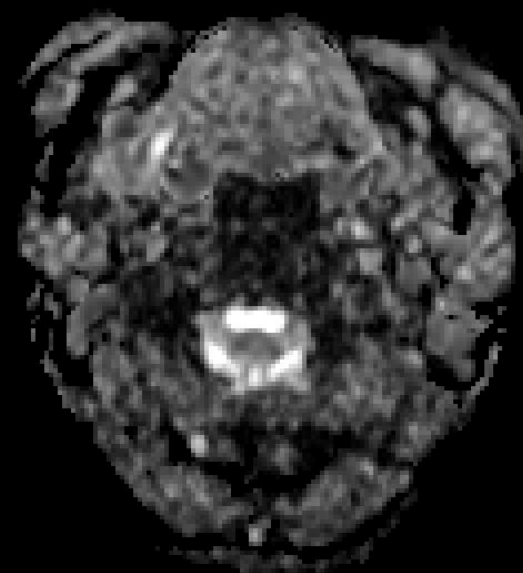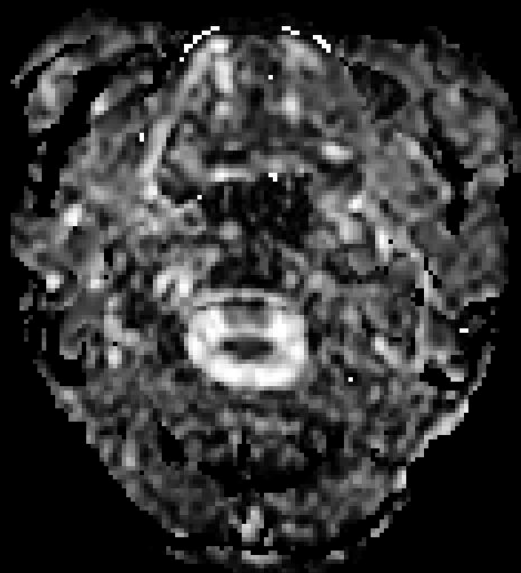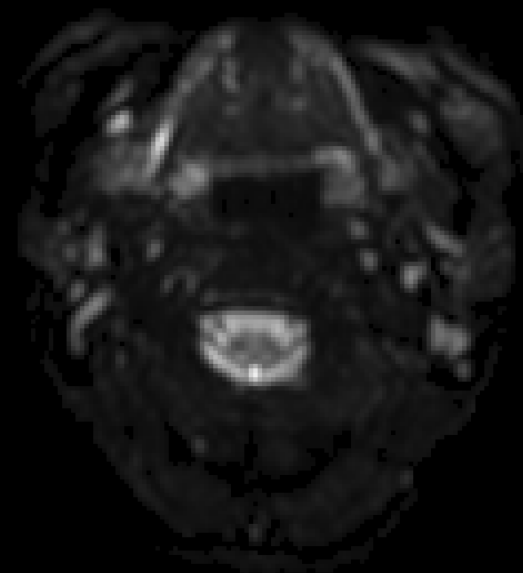

# Network instance 30

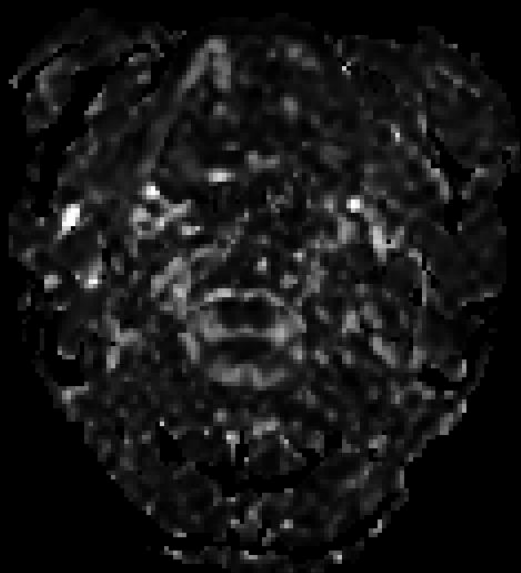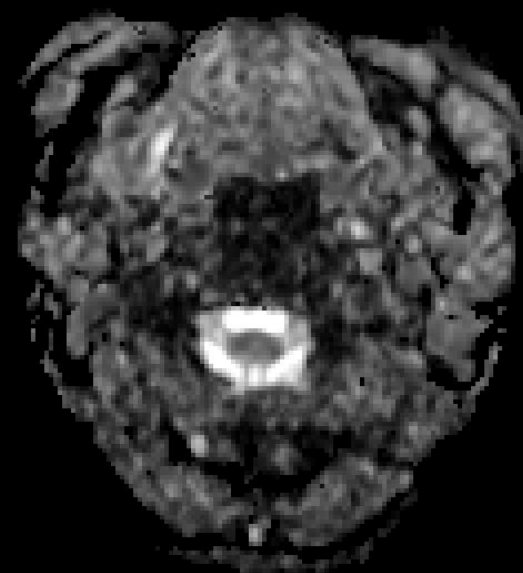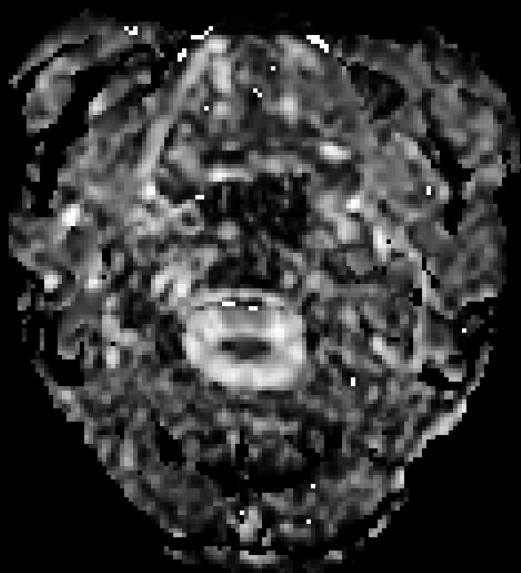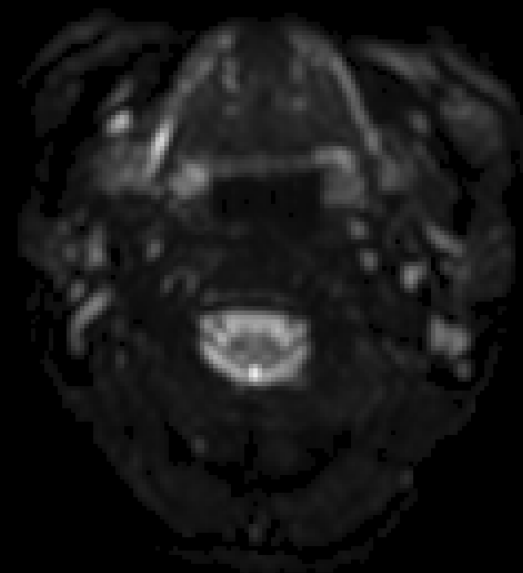

# Network instance 31

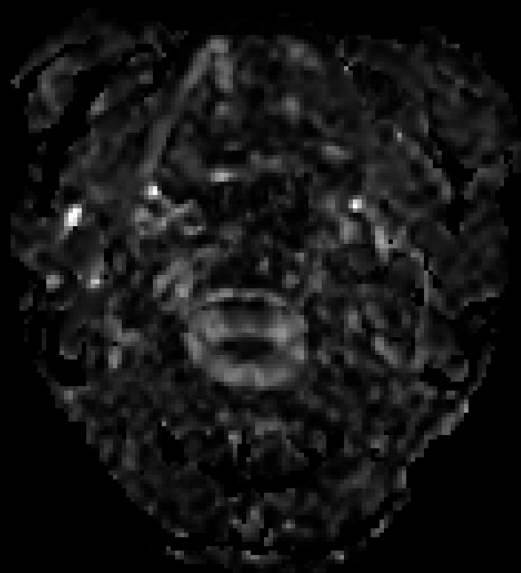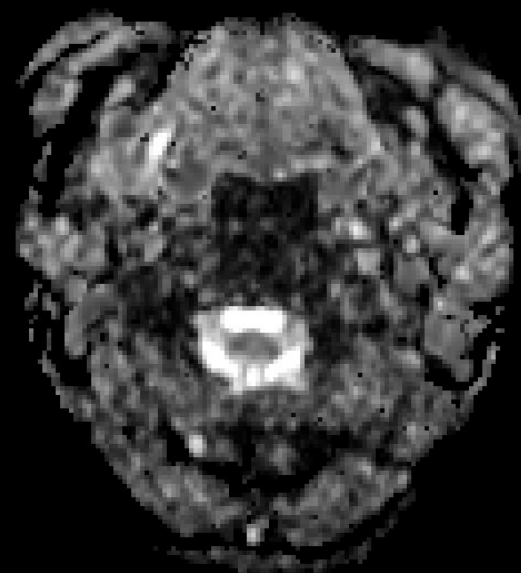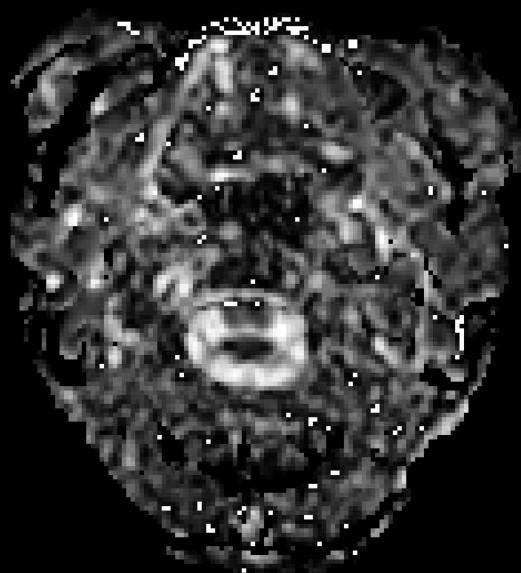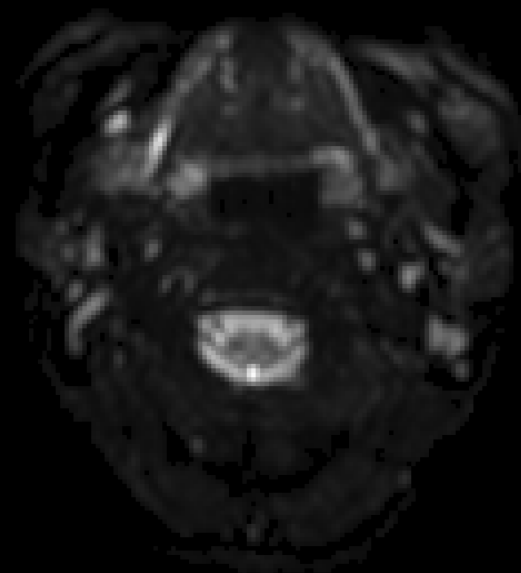

# Network instance 32

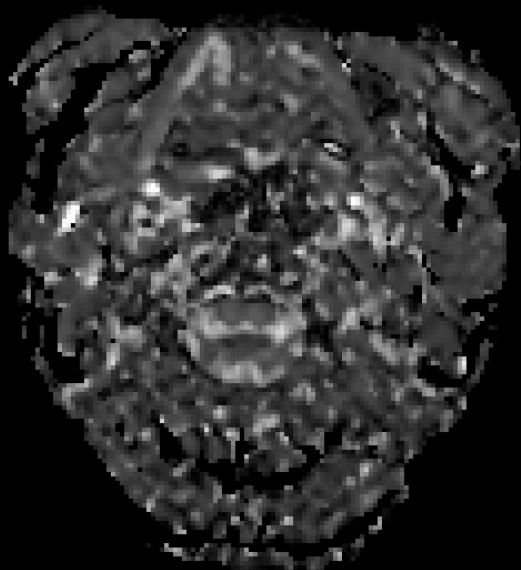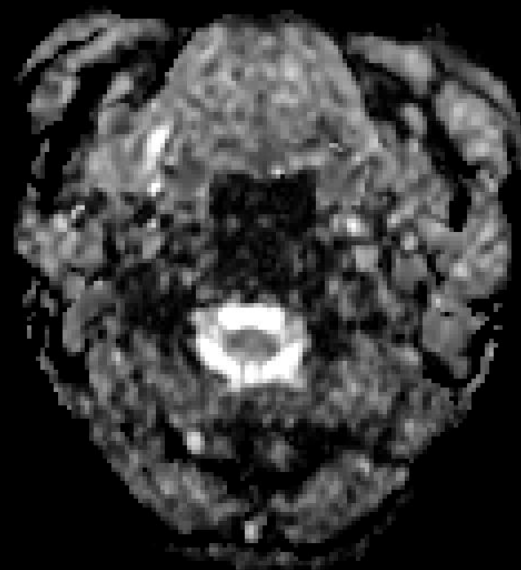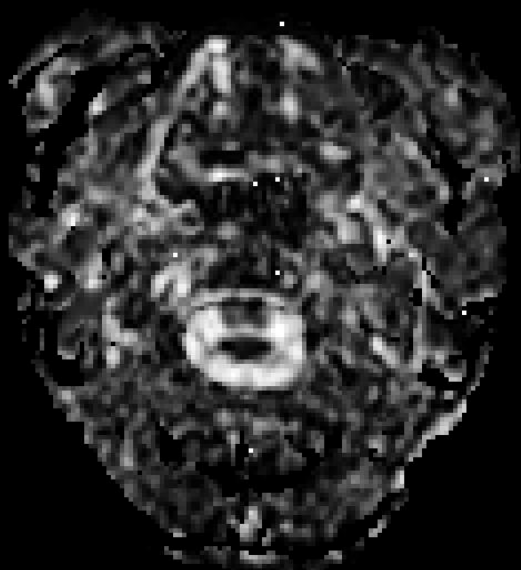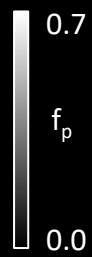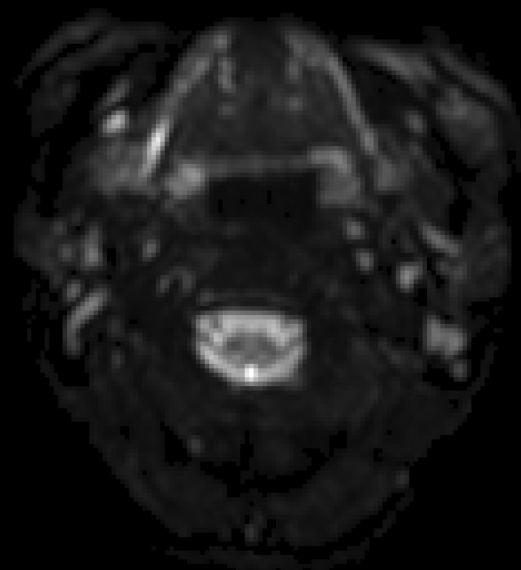

# Network instance 33

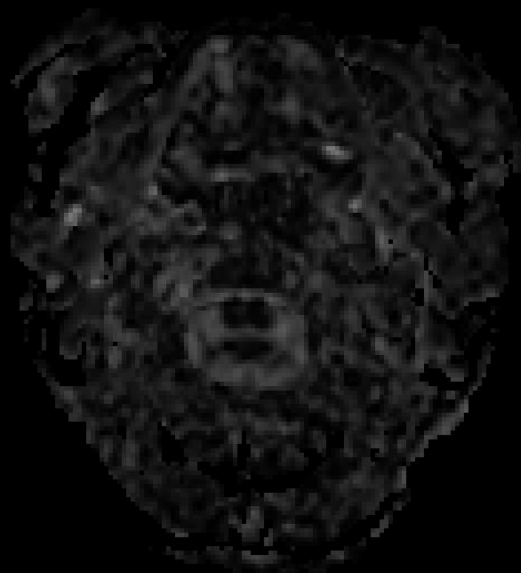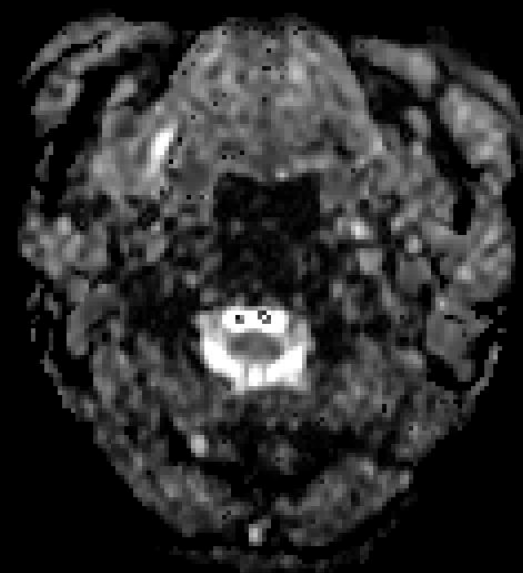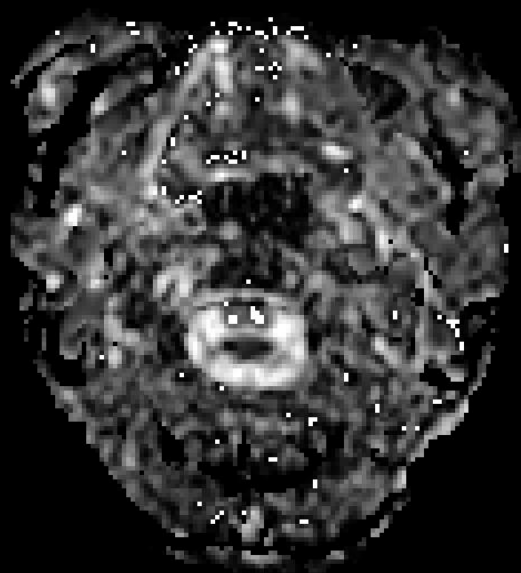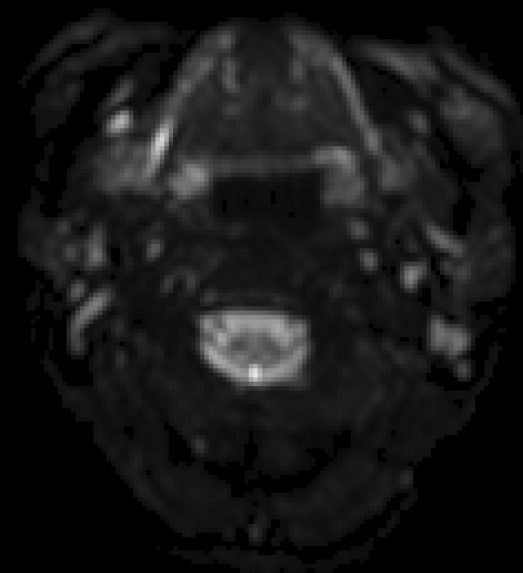

# Network instance 34

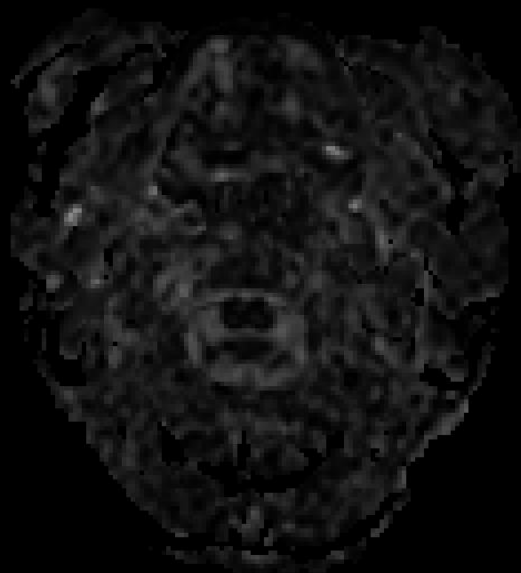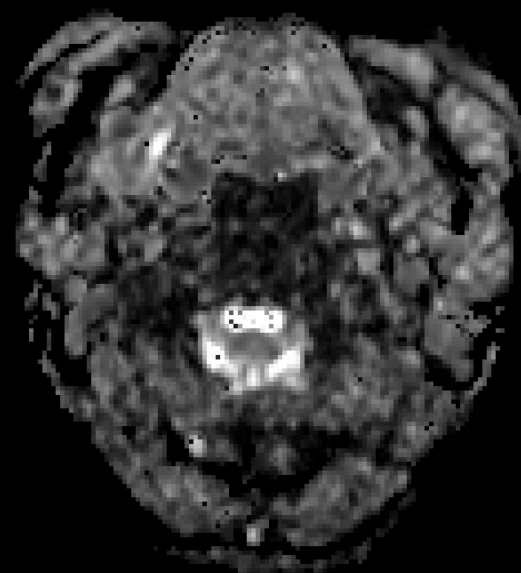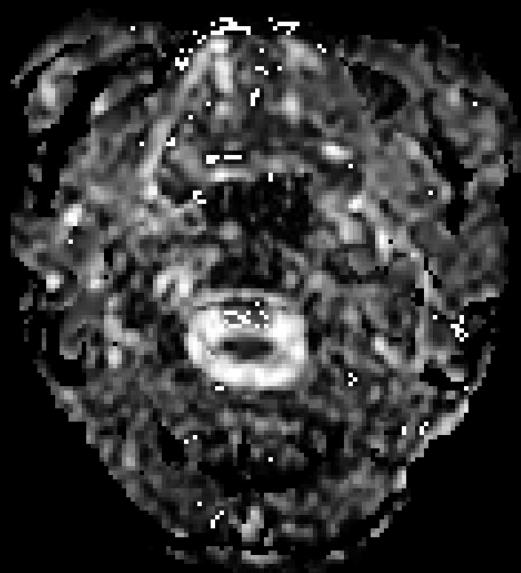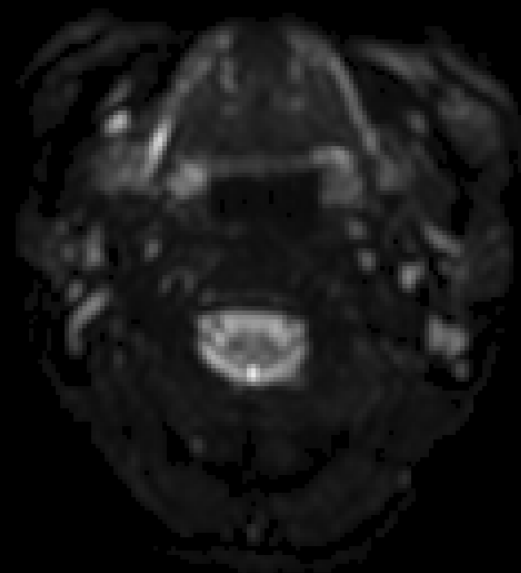

# Network instance 35

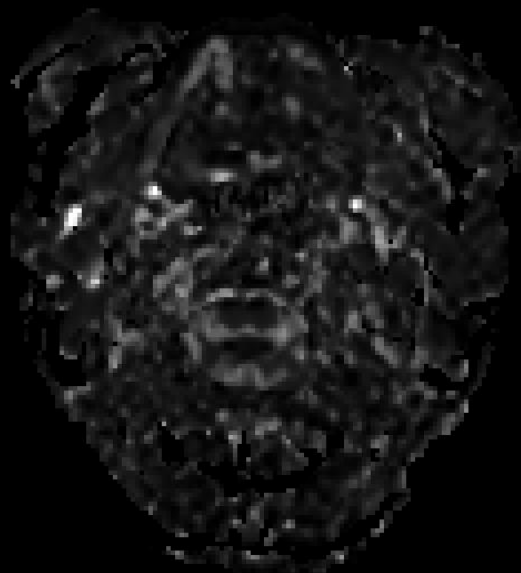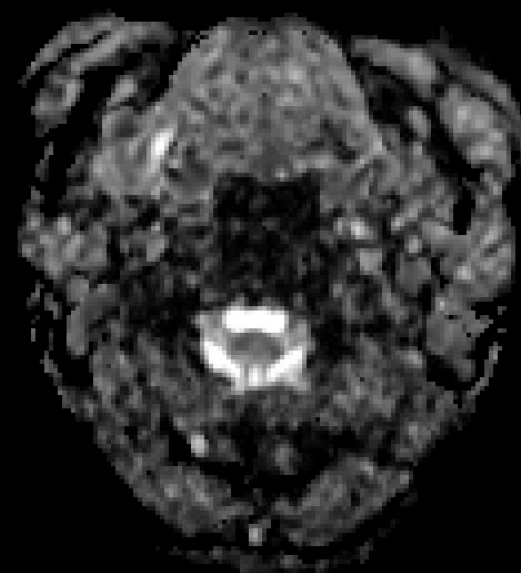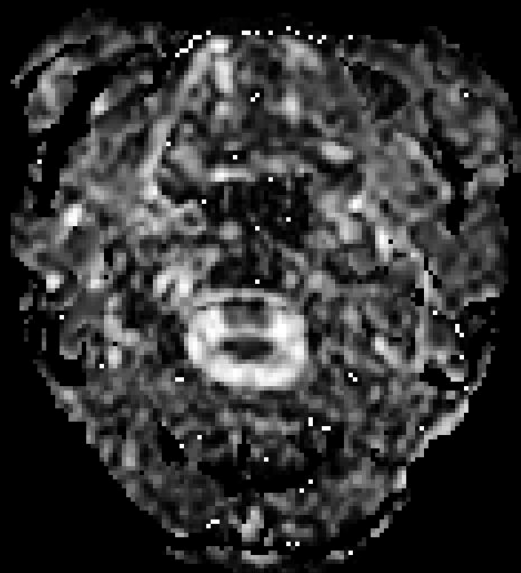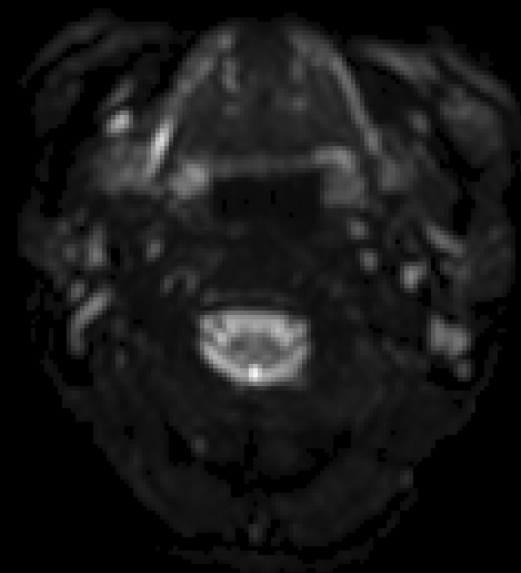



# Network instance 36

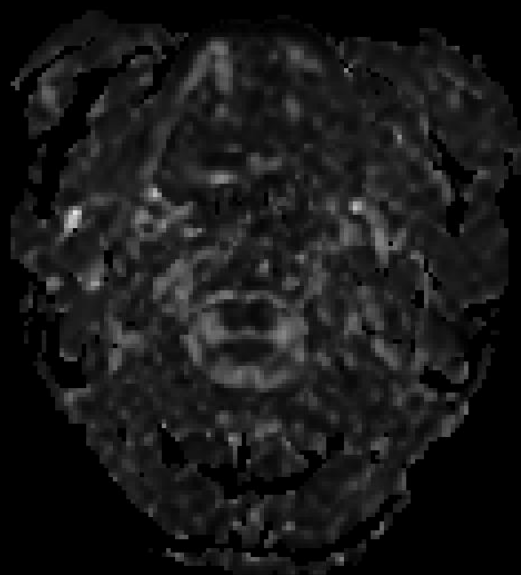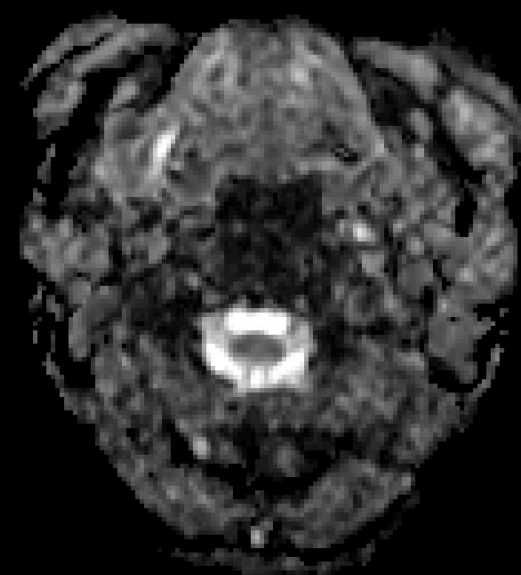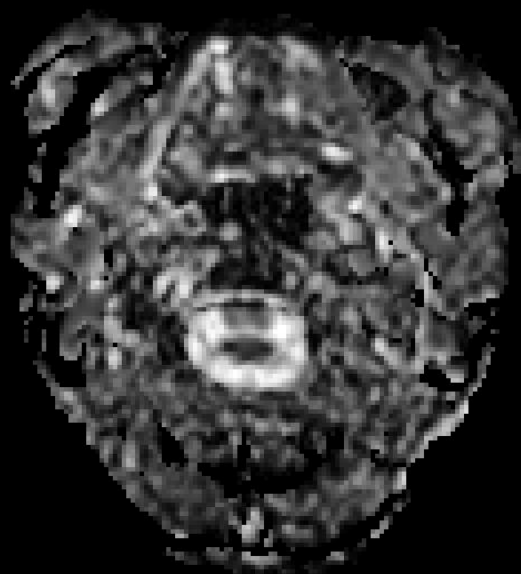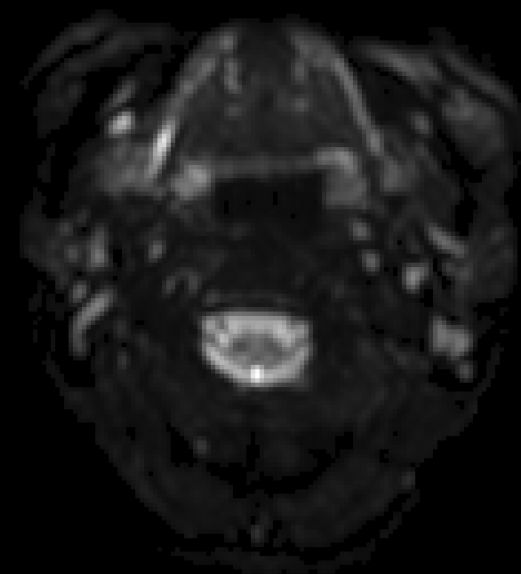

# Network instance 37

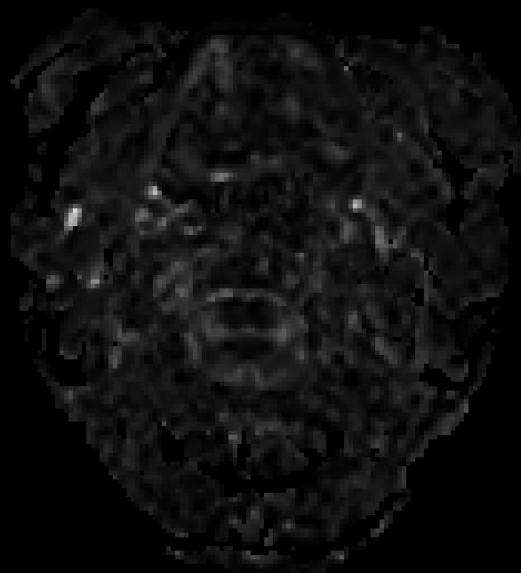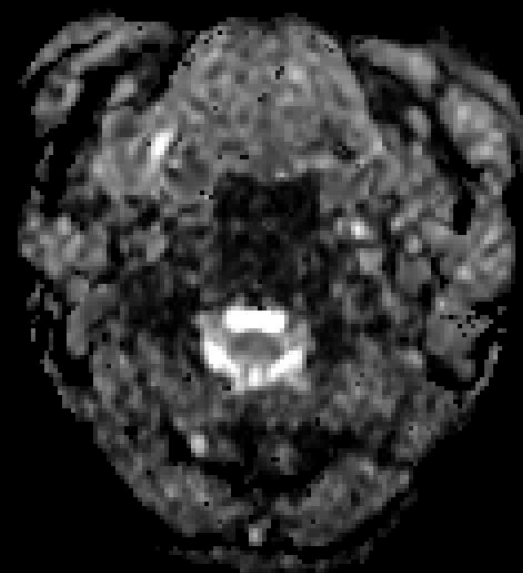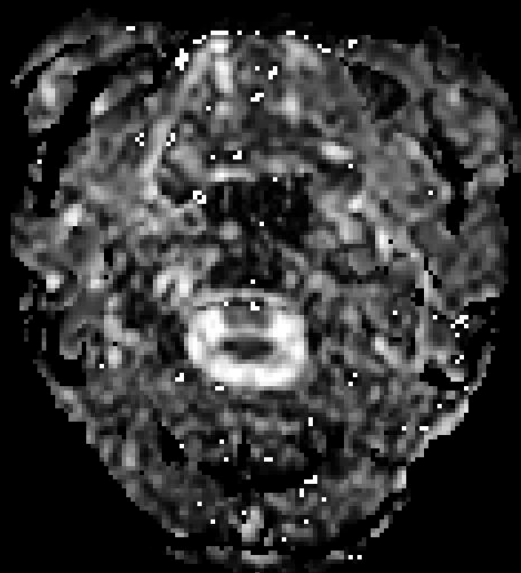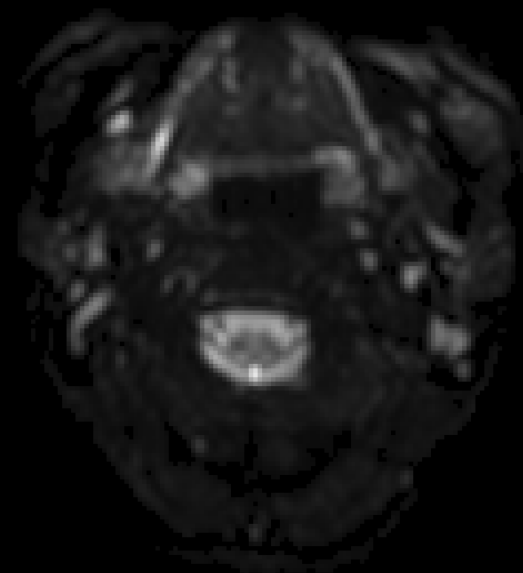

# Network instance 38

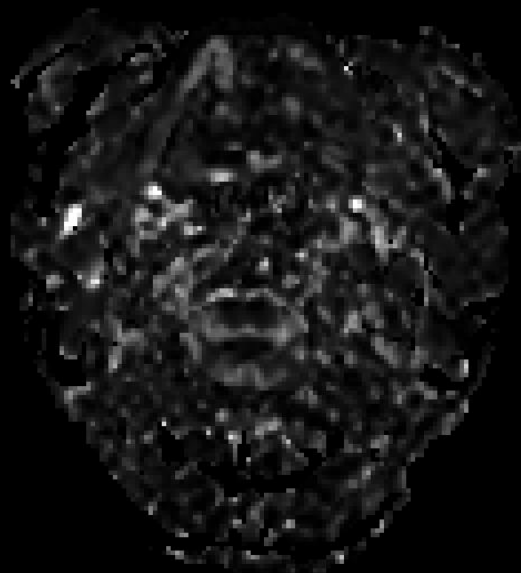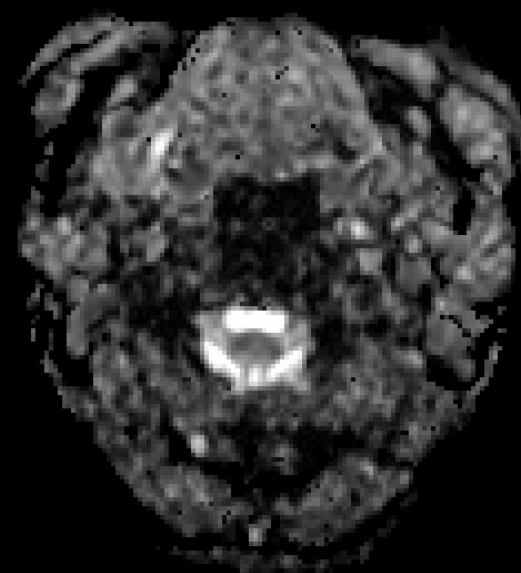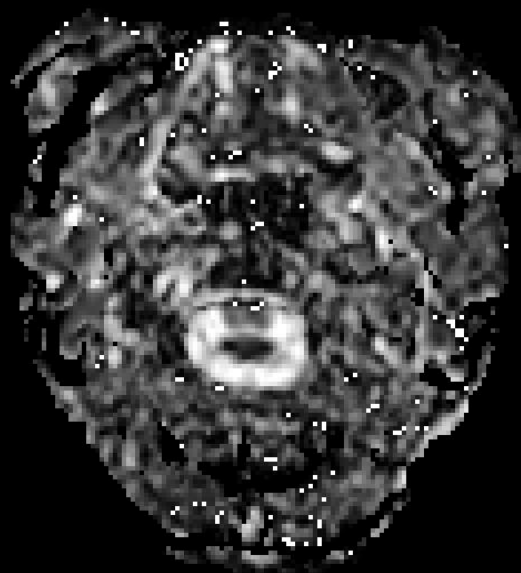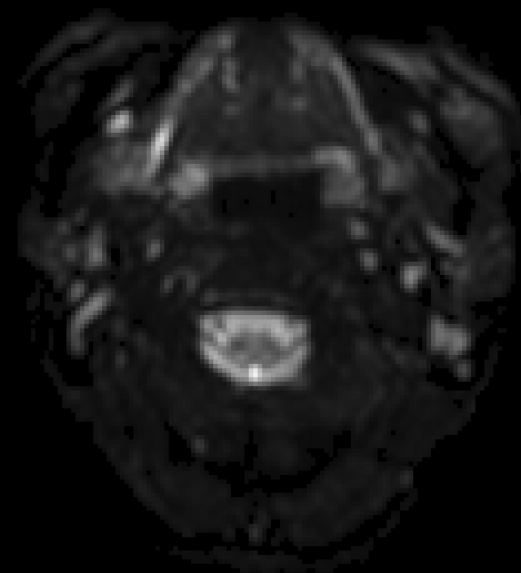

# Network instance 39

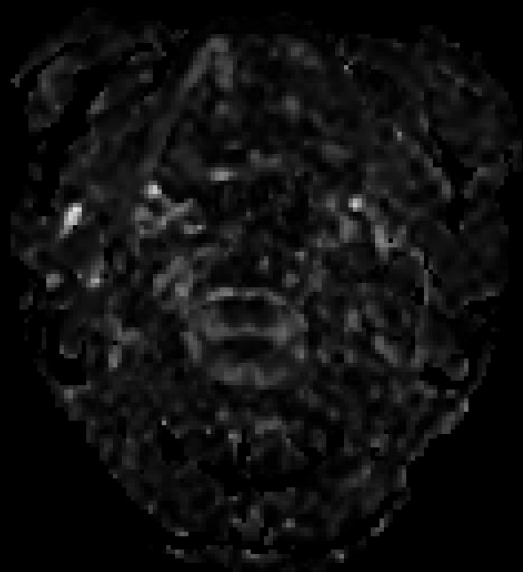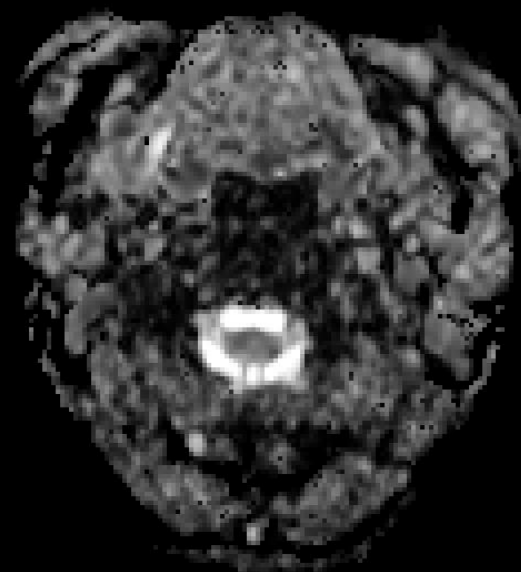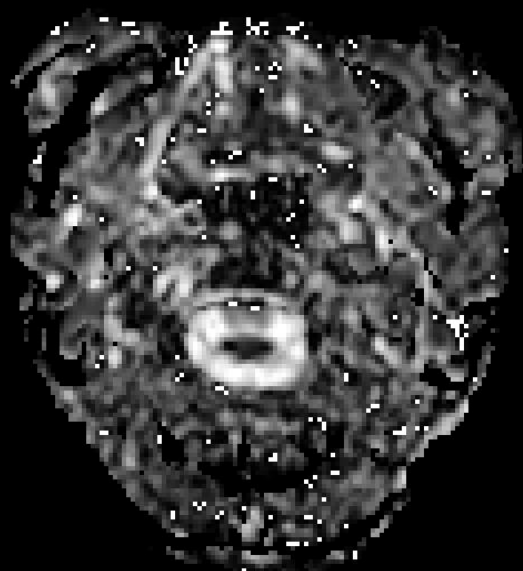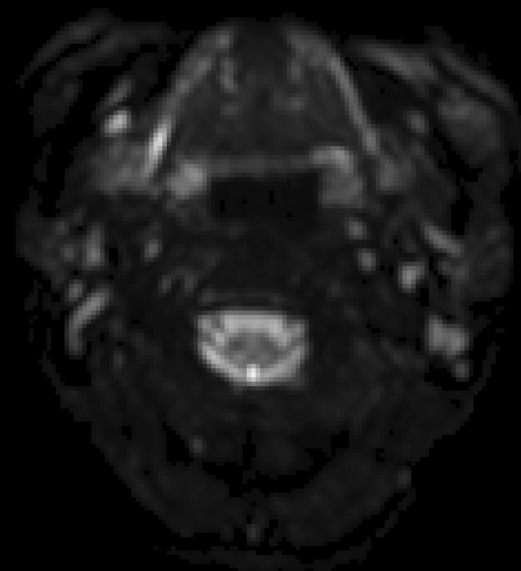

# Network instance 40

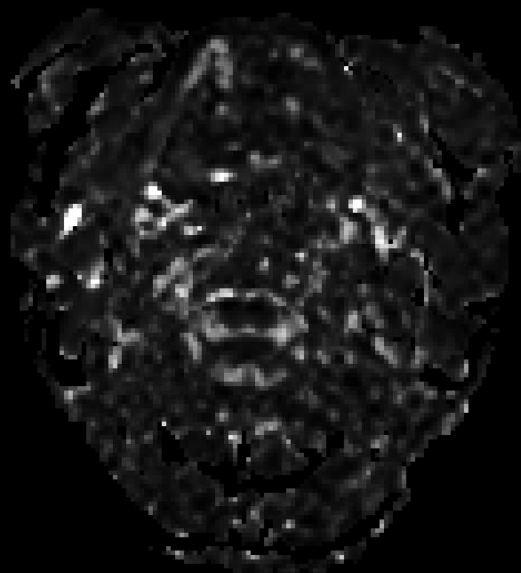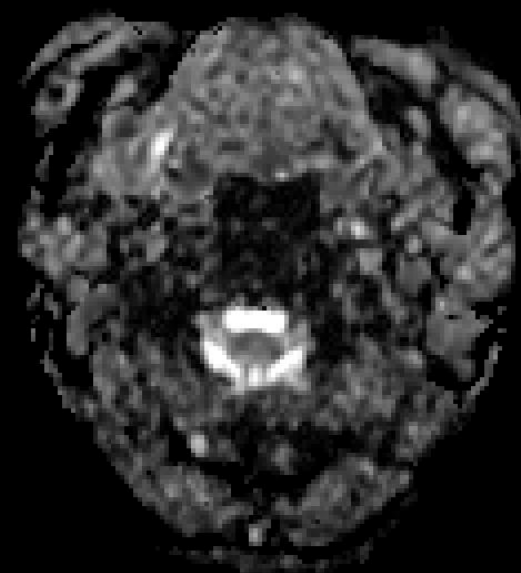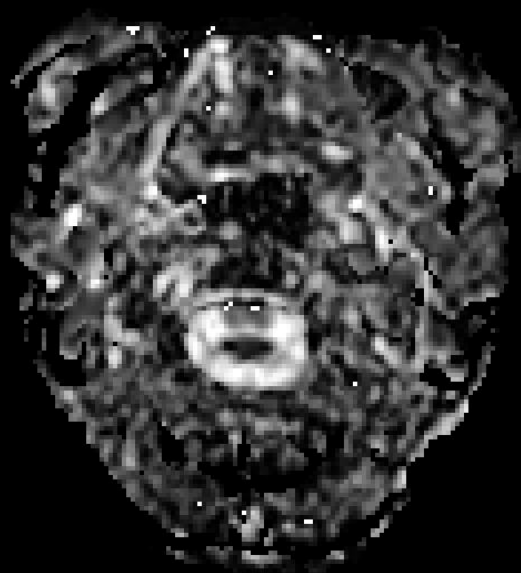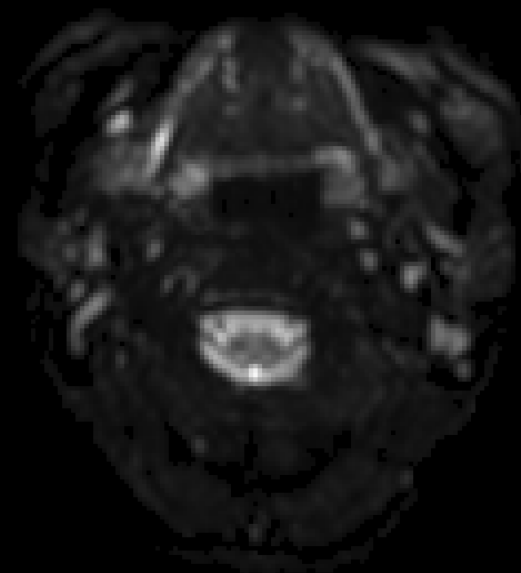

# Network instance 41

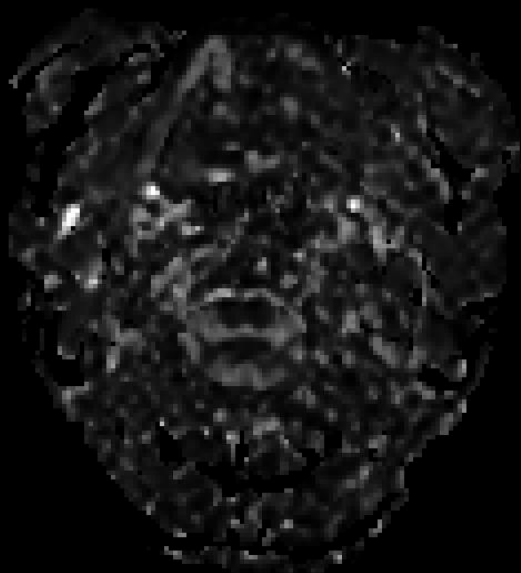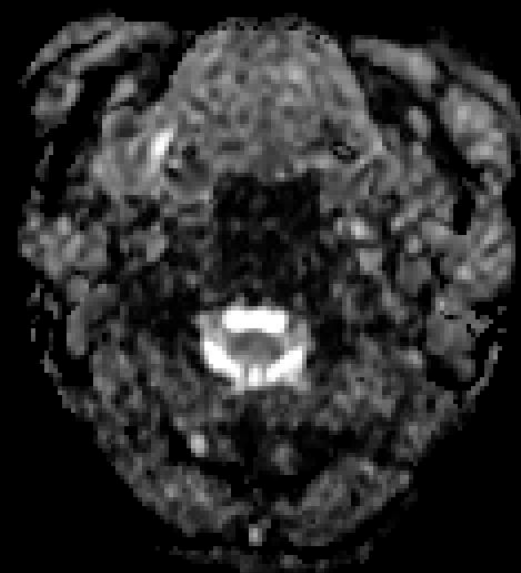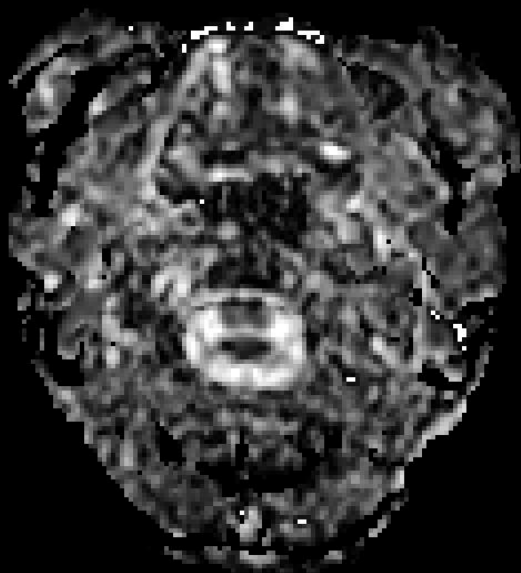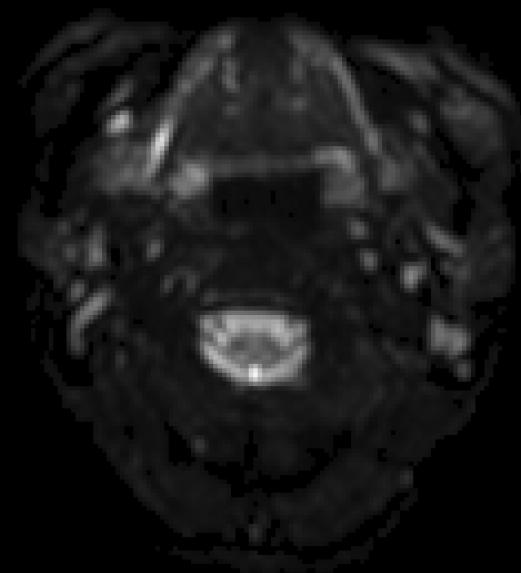

# Network instance 42

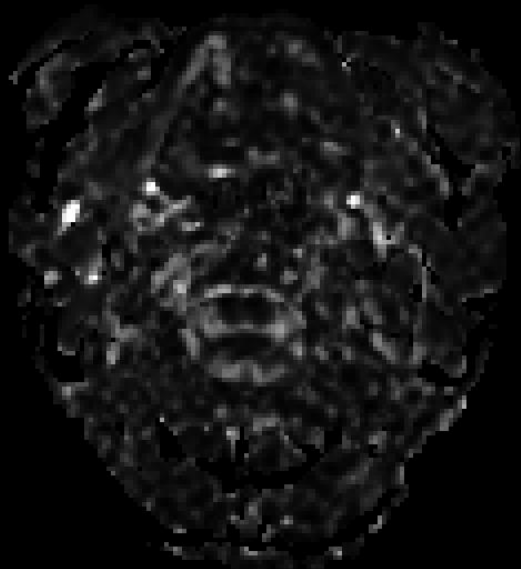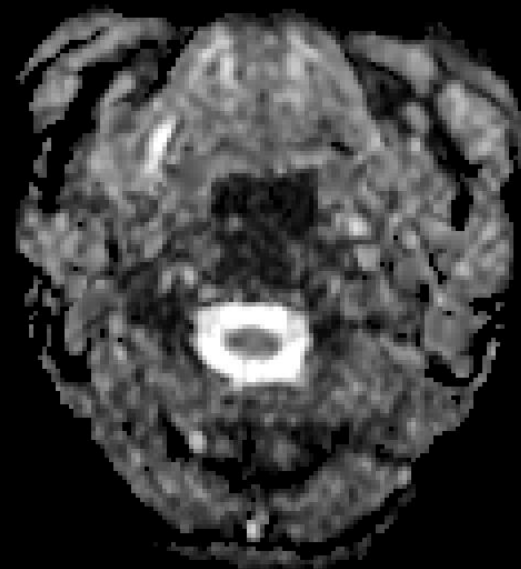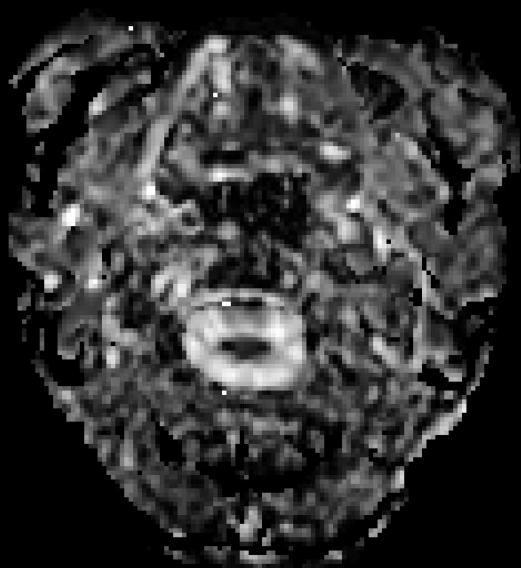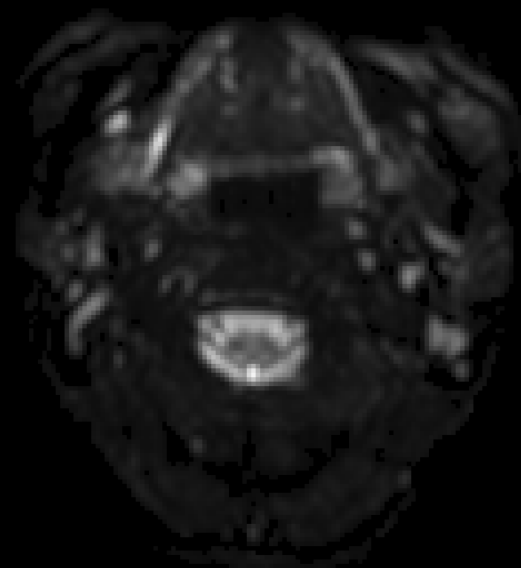

# Network instance 43

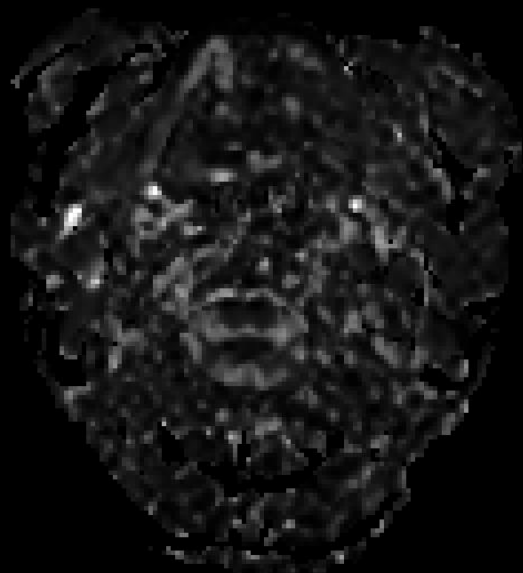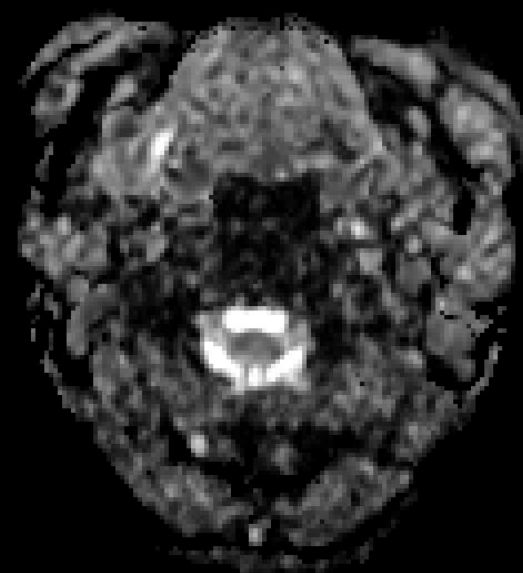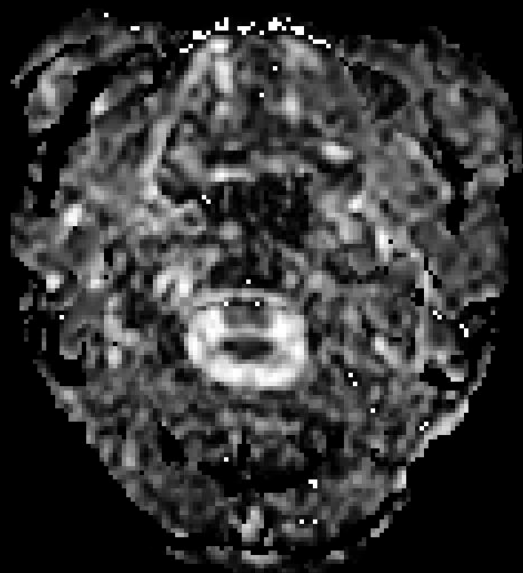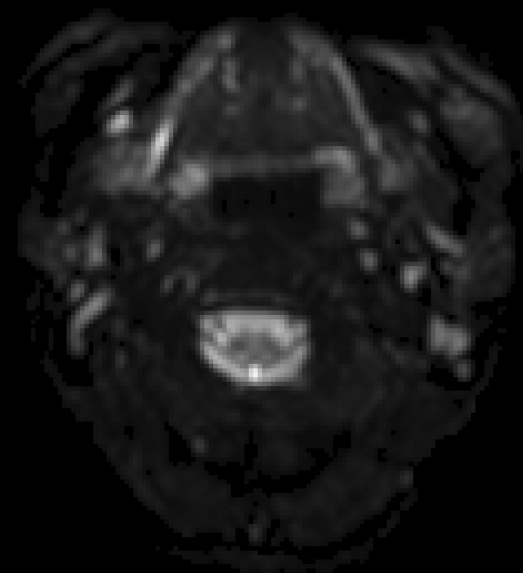



# Network instance 44

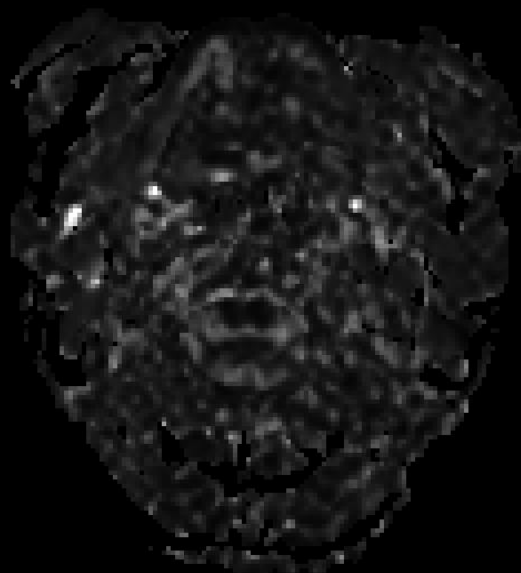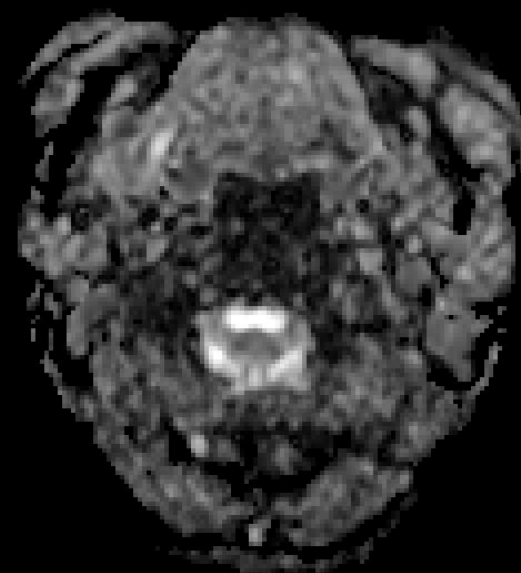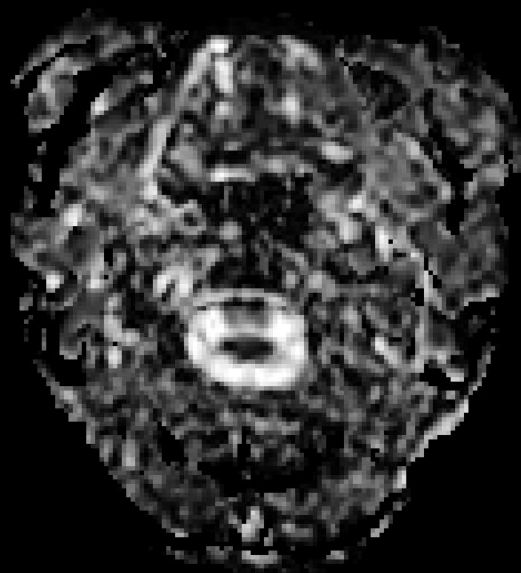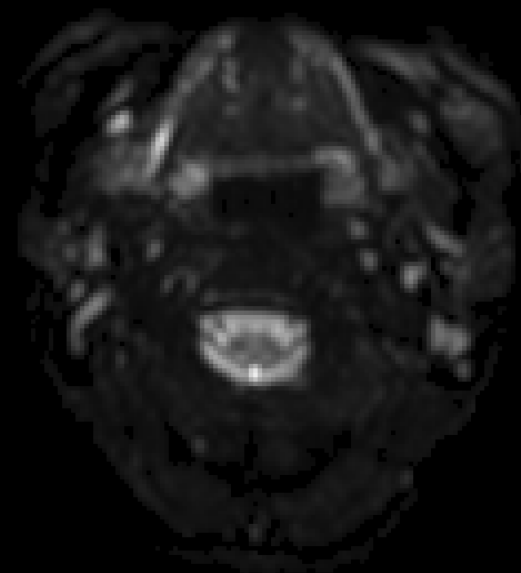

# Network instance 45

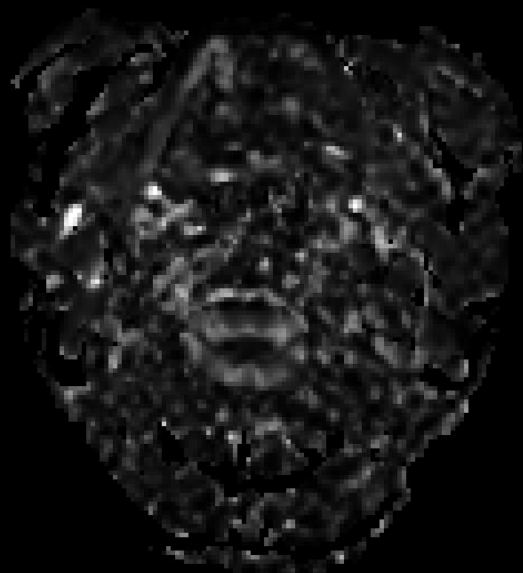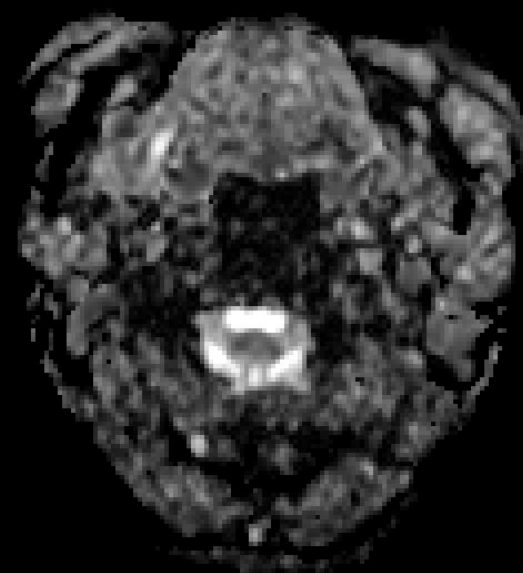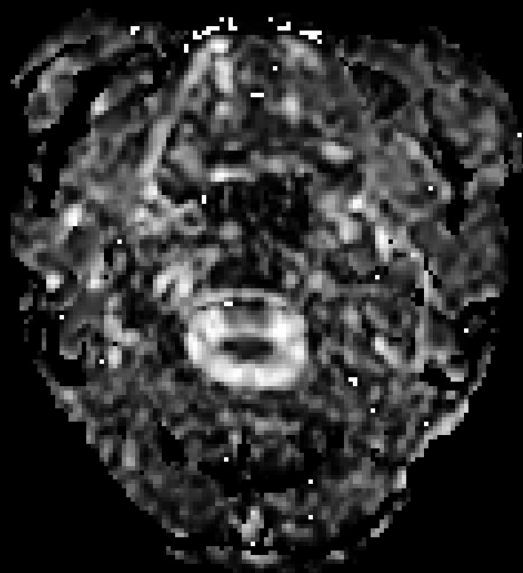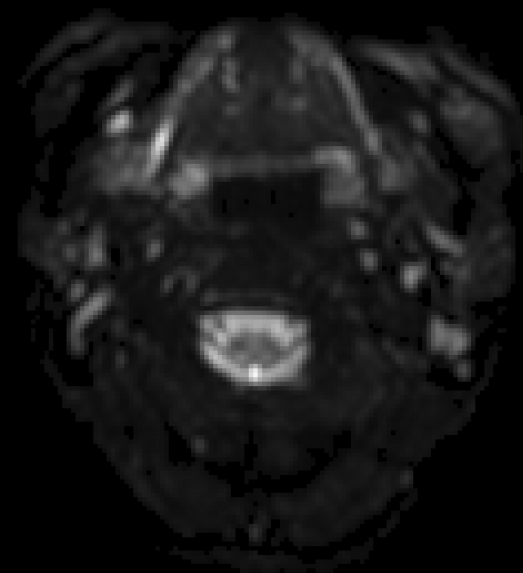

# Network instance 46

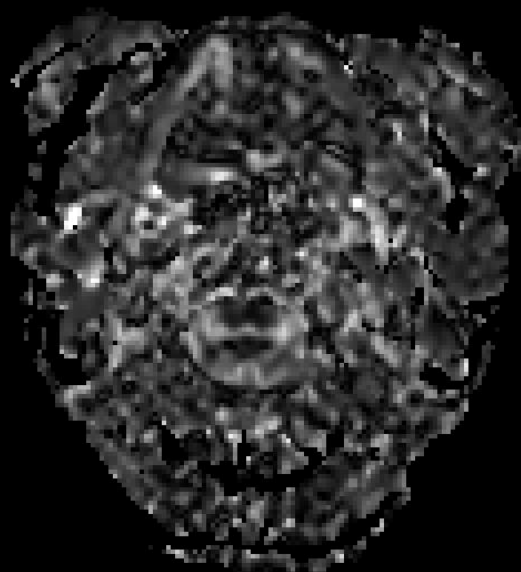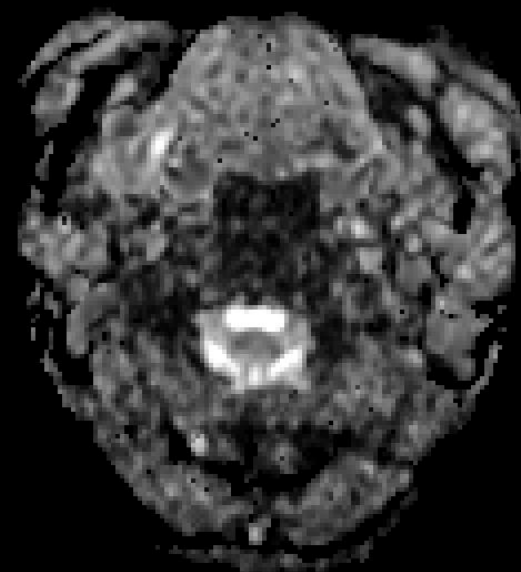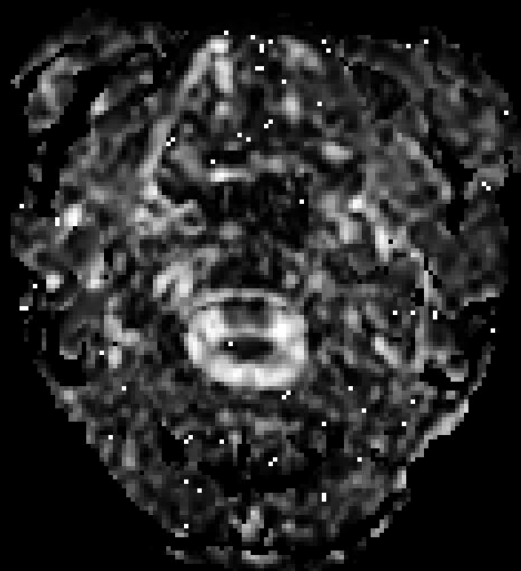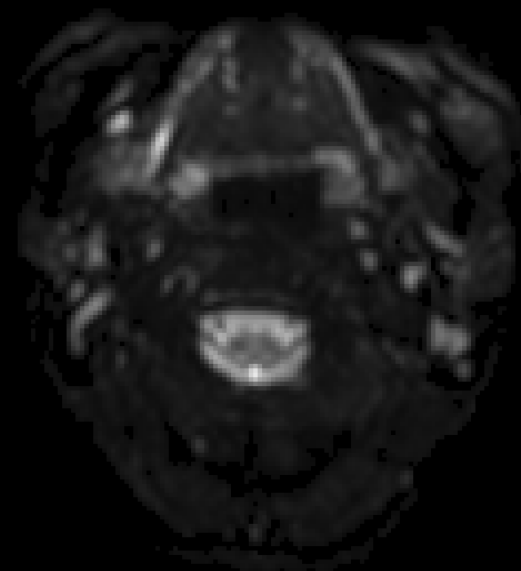

# Network instance 47

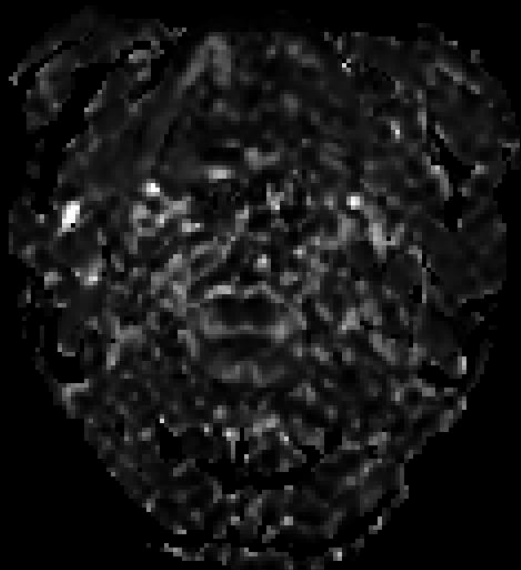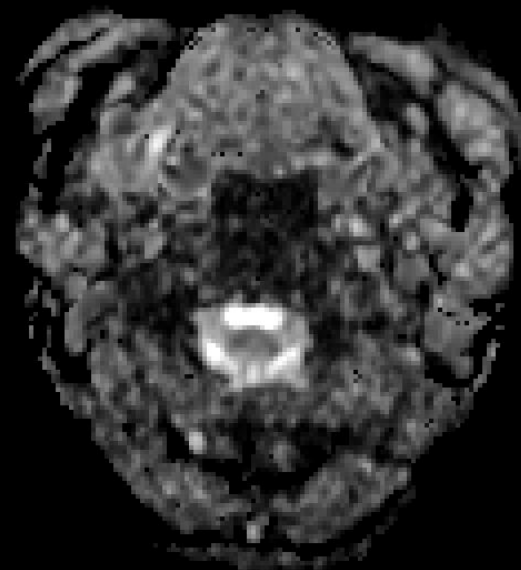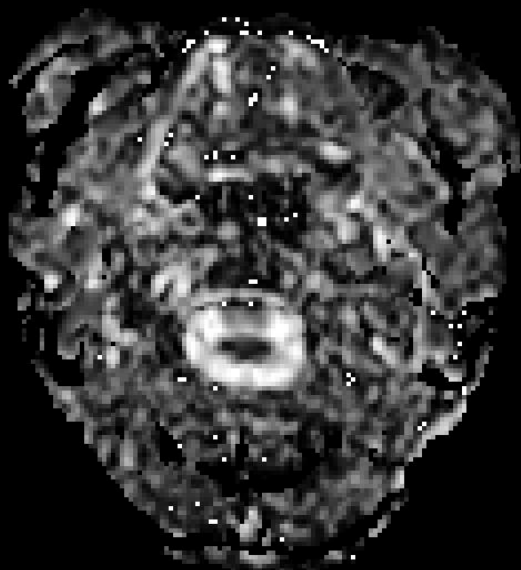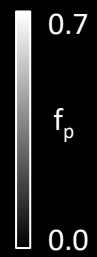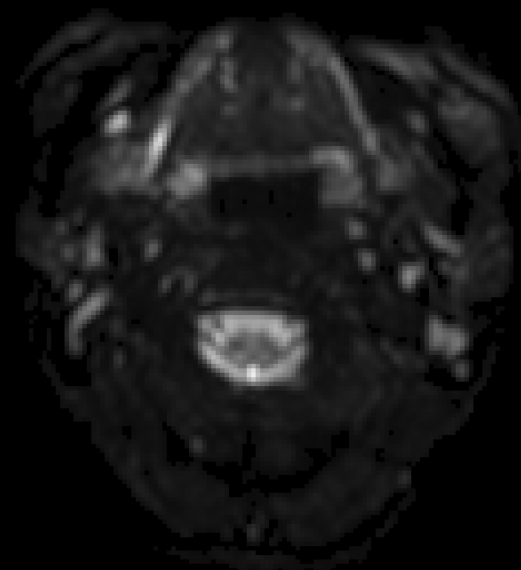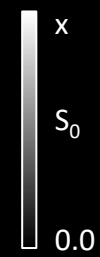

# Network instance 48

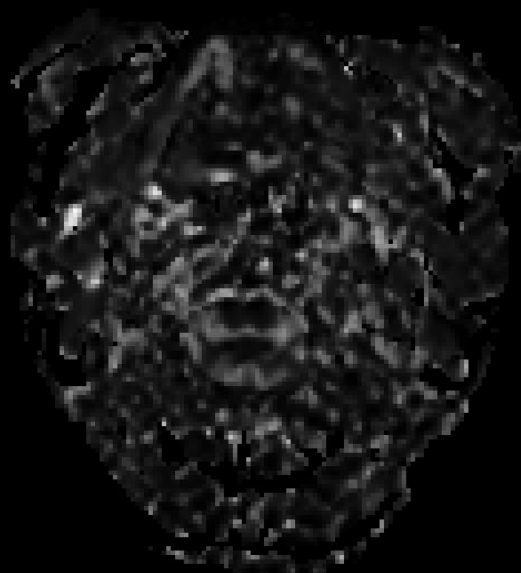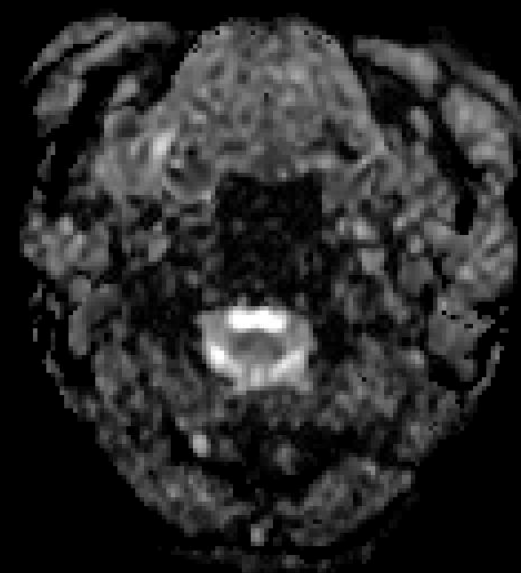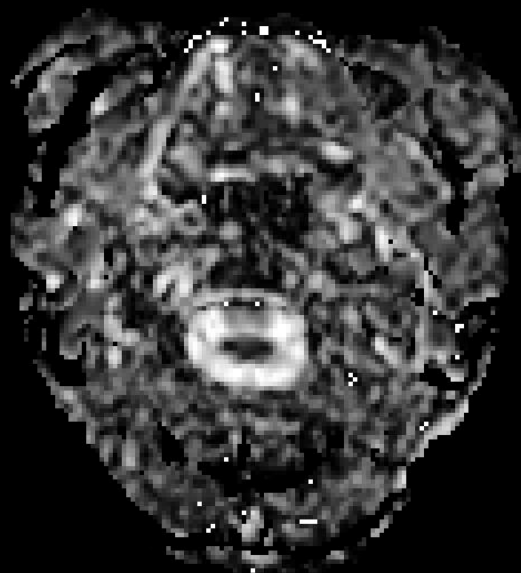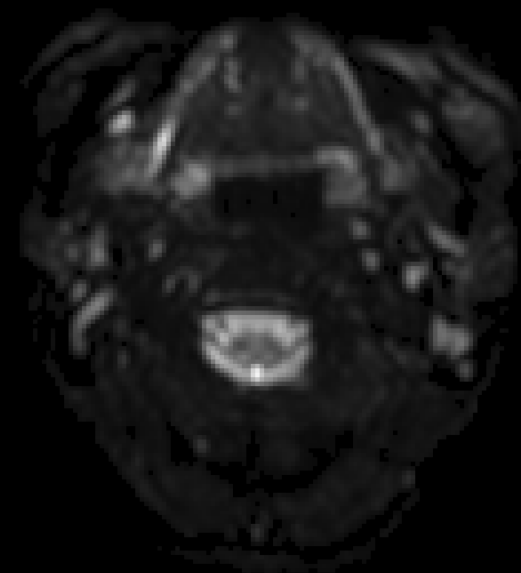

# Network instance 49

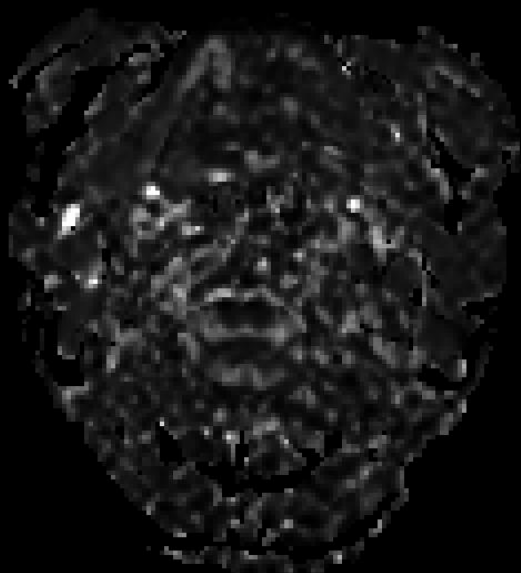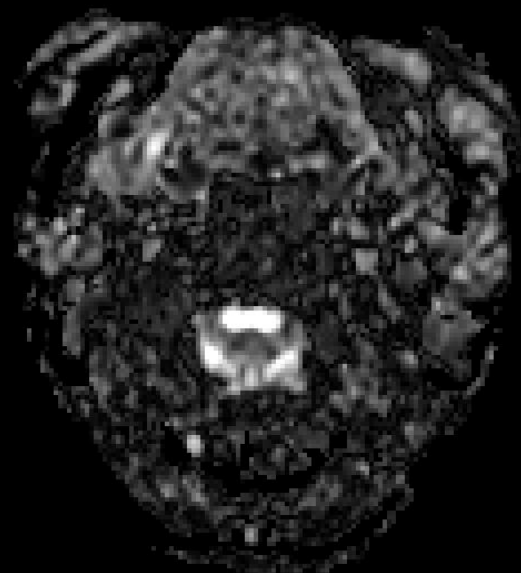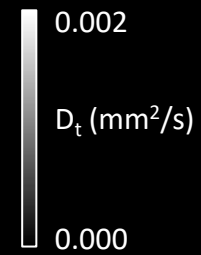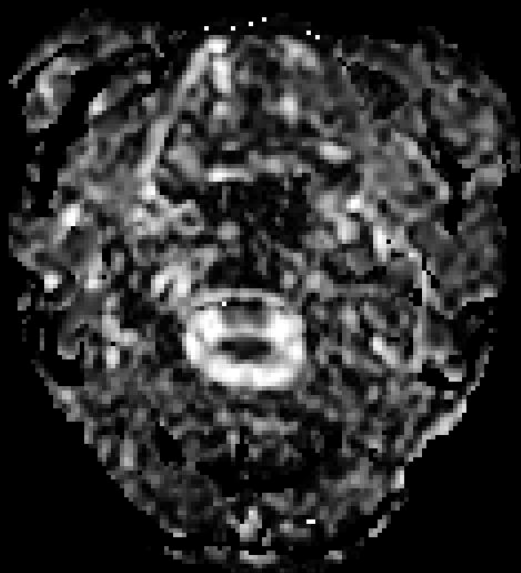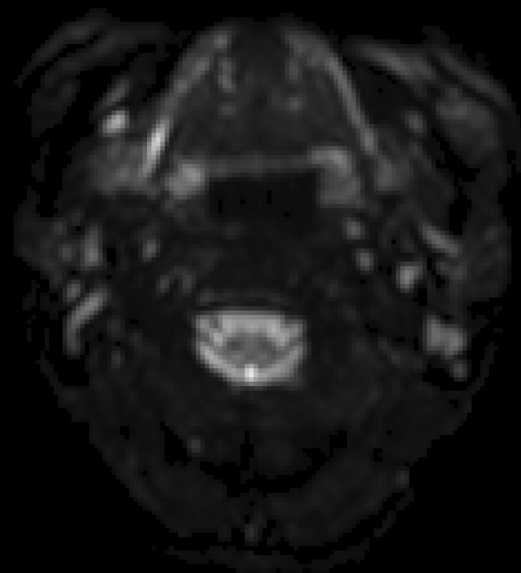

# Network instance 50

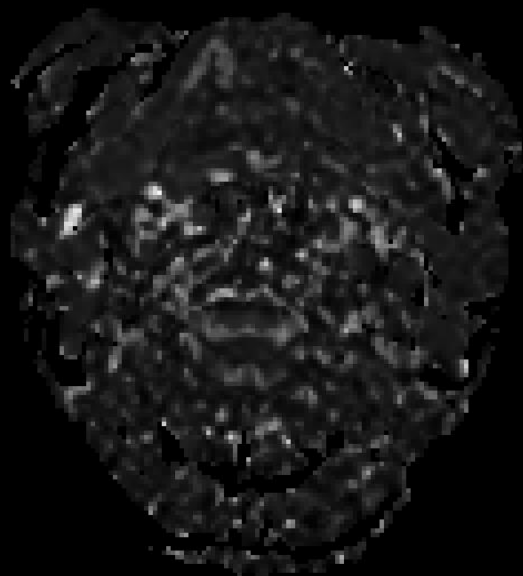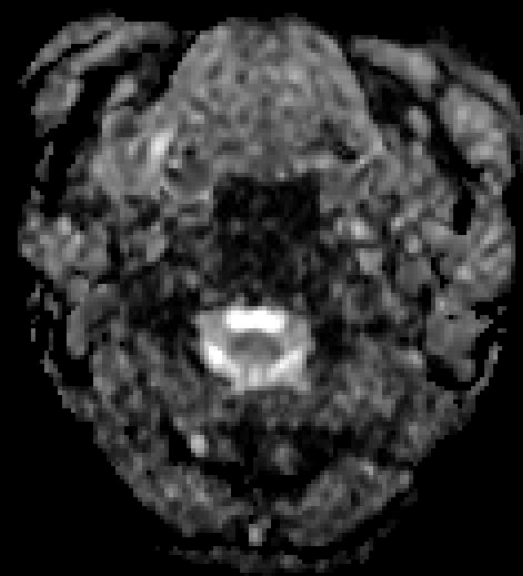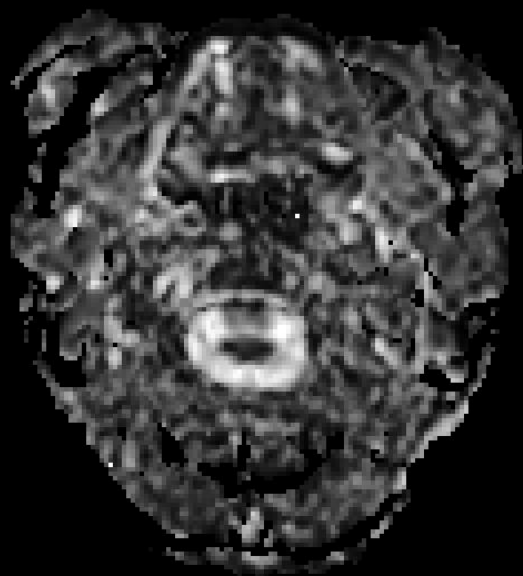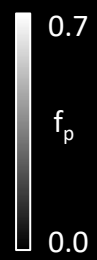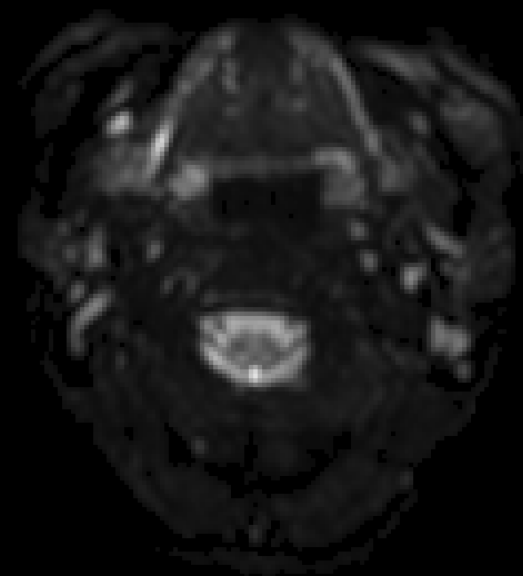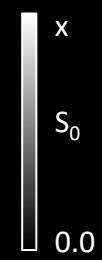

# Network instance 51

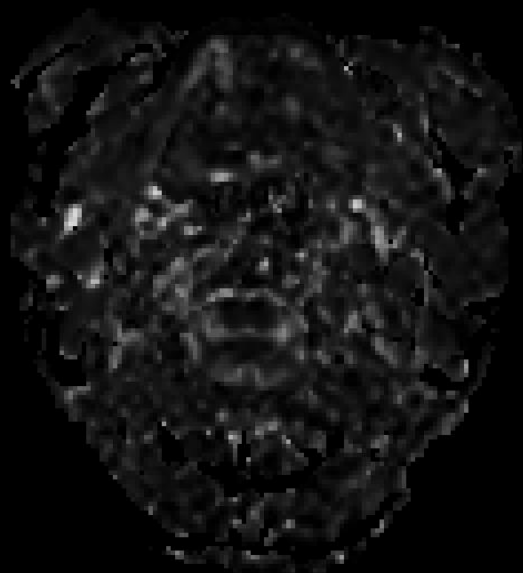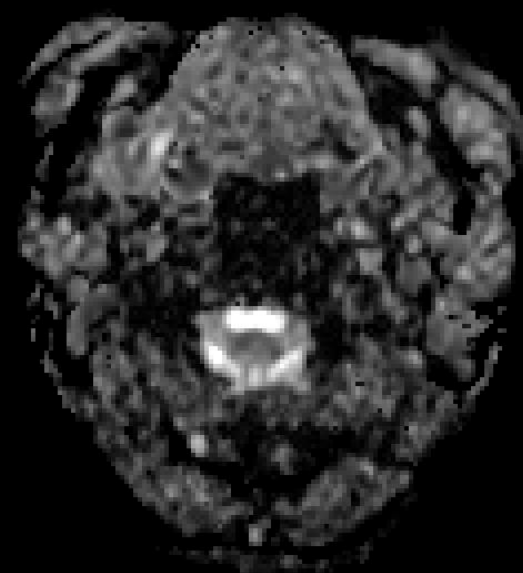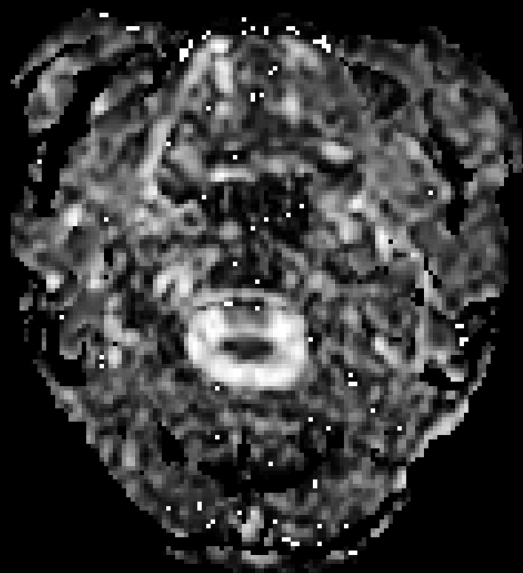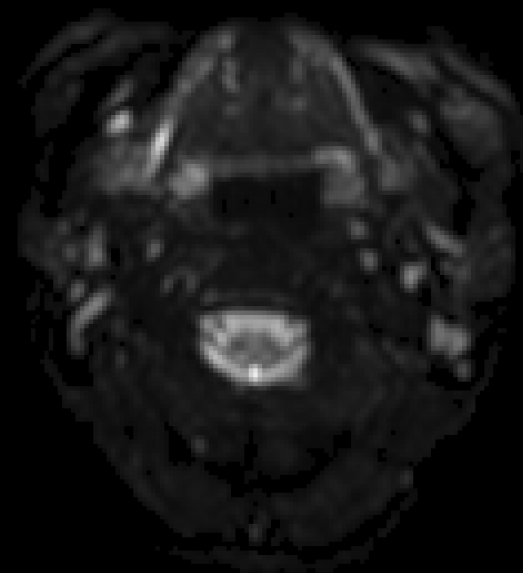



# Network instance 52

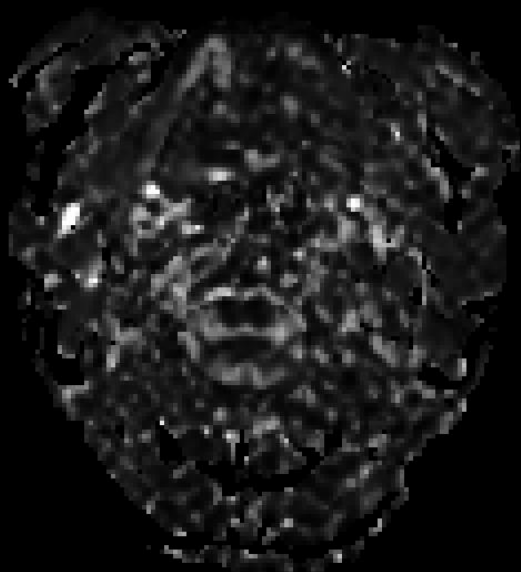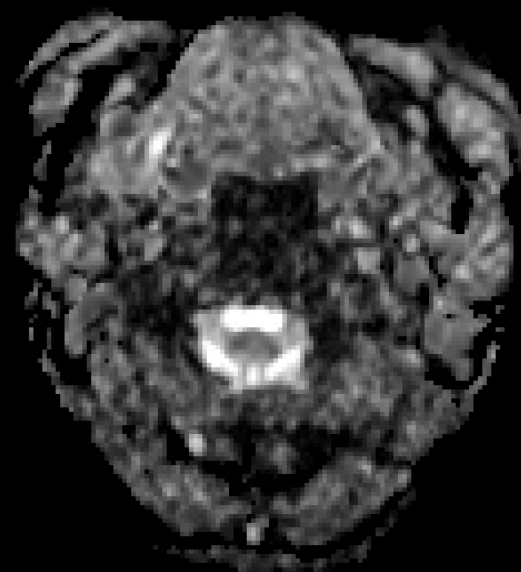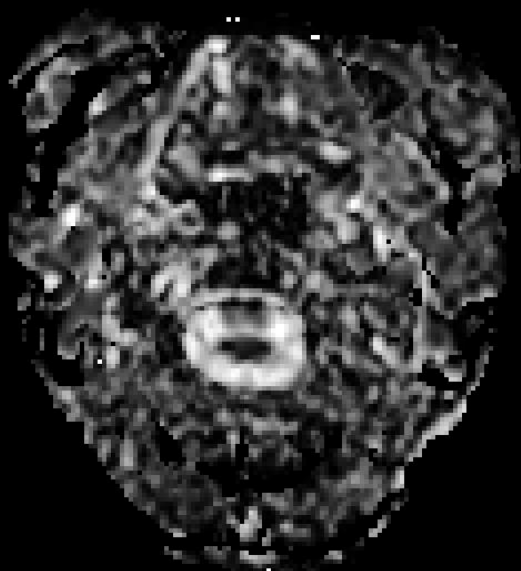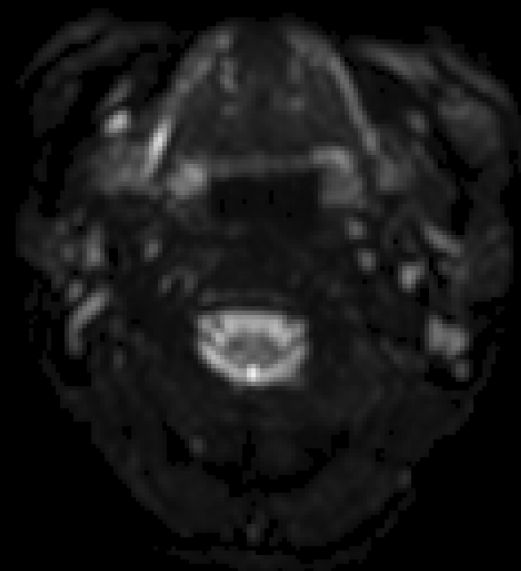

# Network instance 53

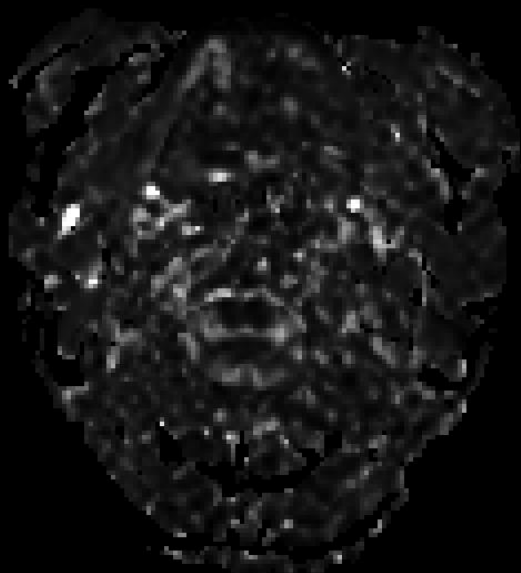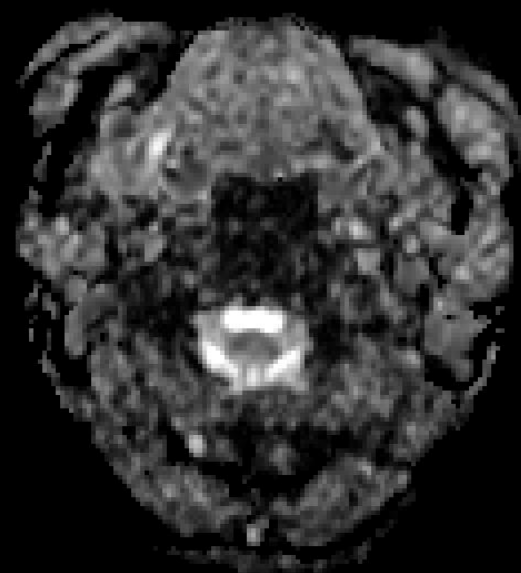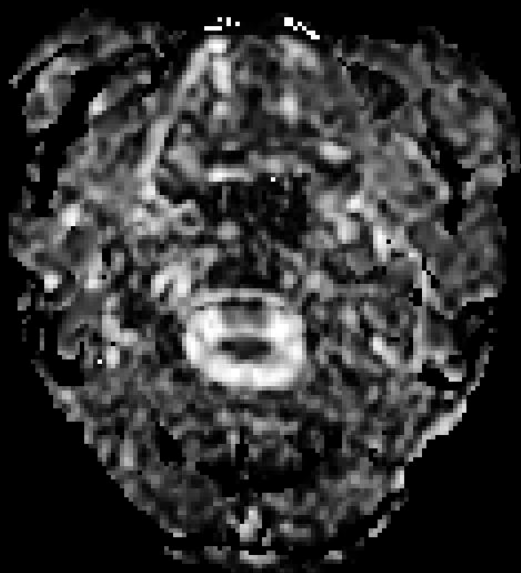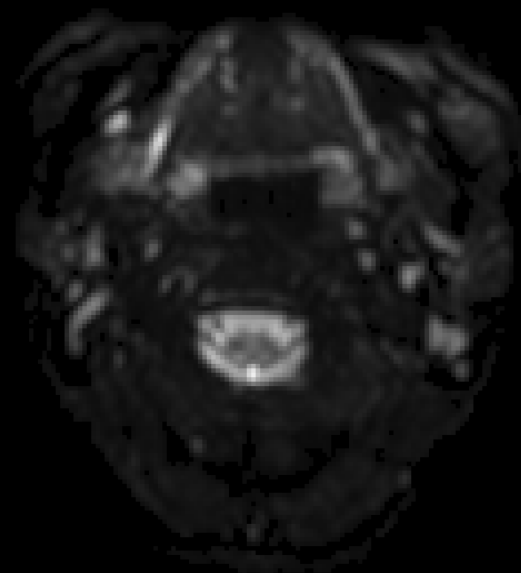

# Network instance 54

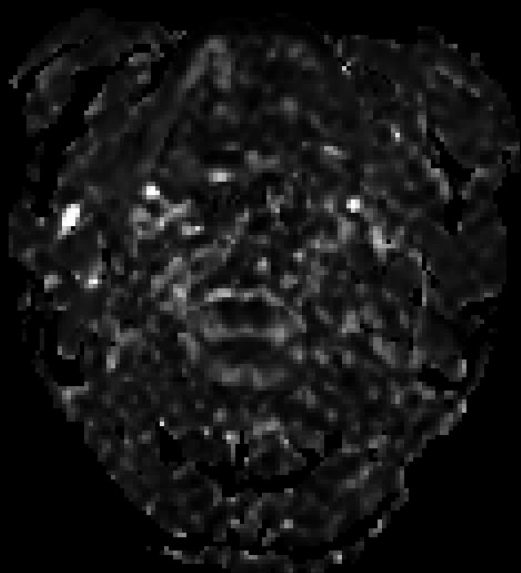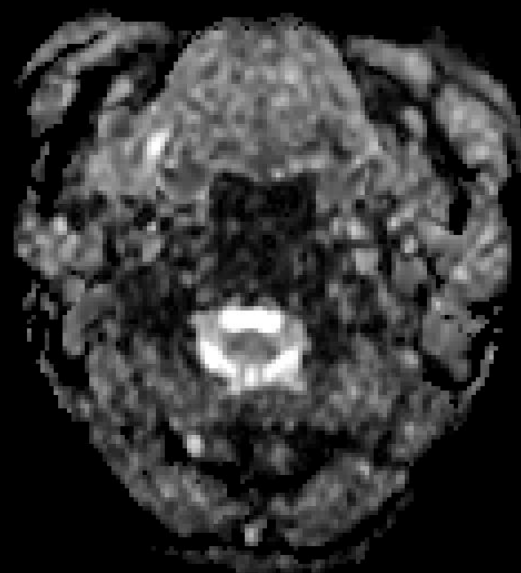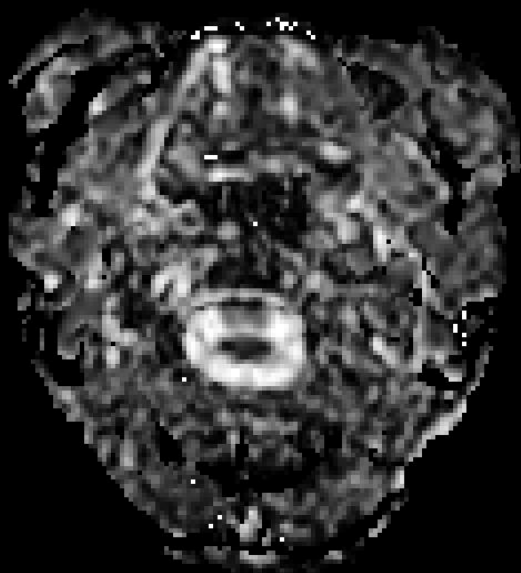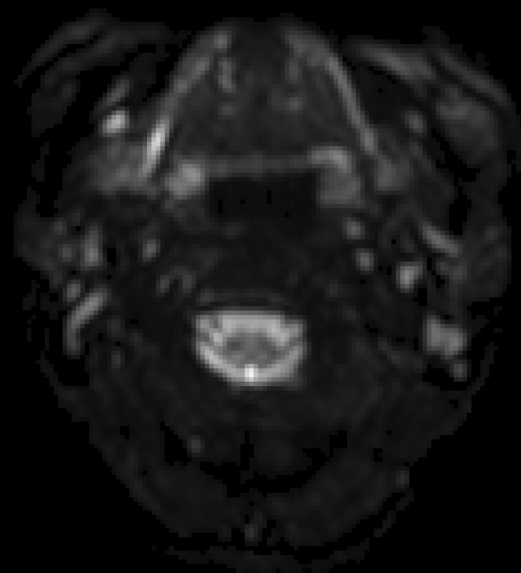

# Network instance 55

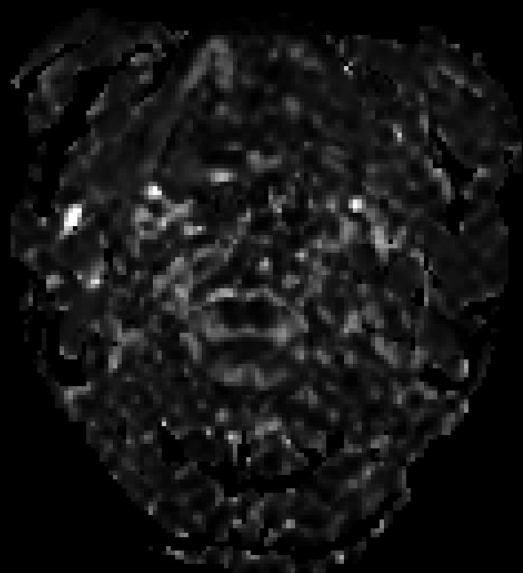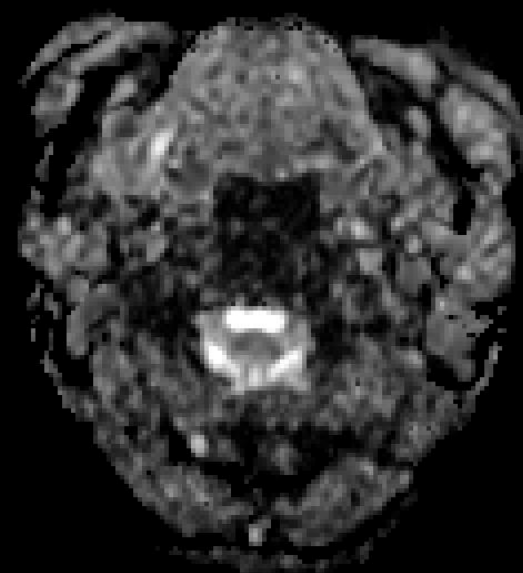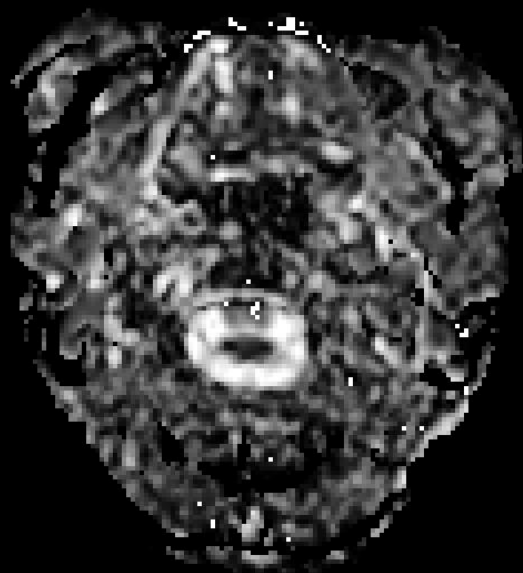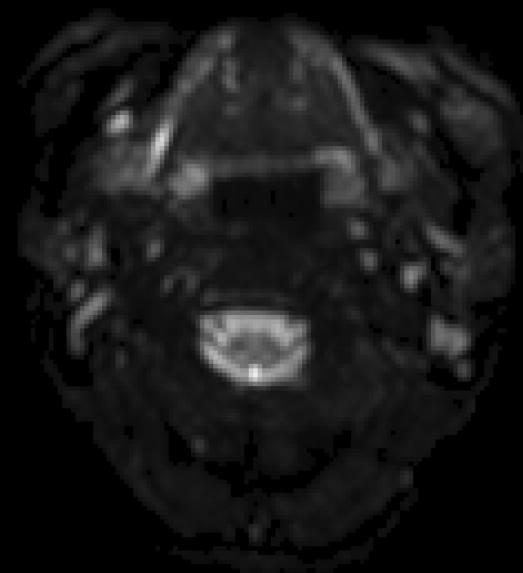

# Network instance 56

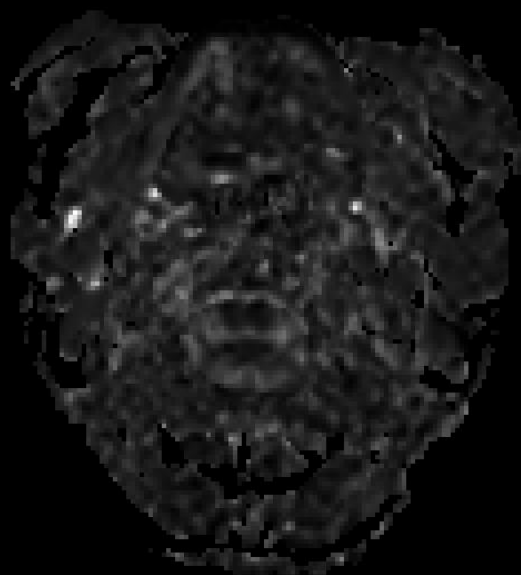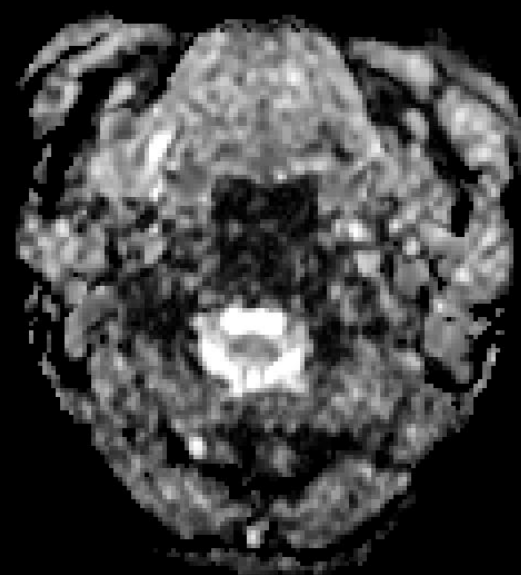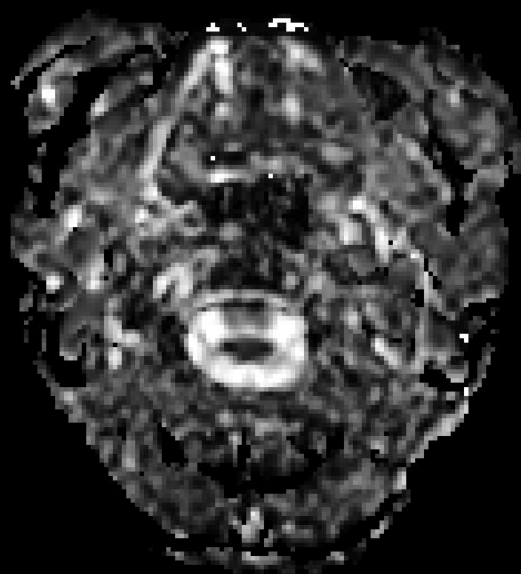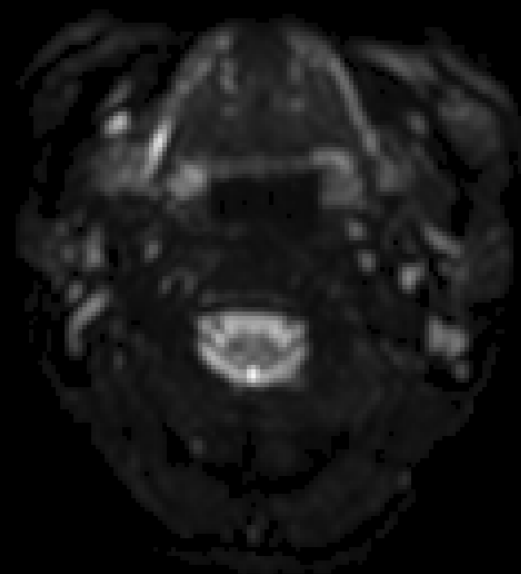

# Network instance 57

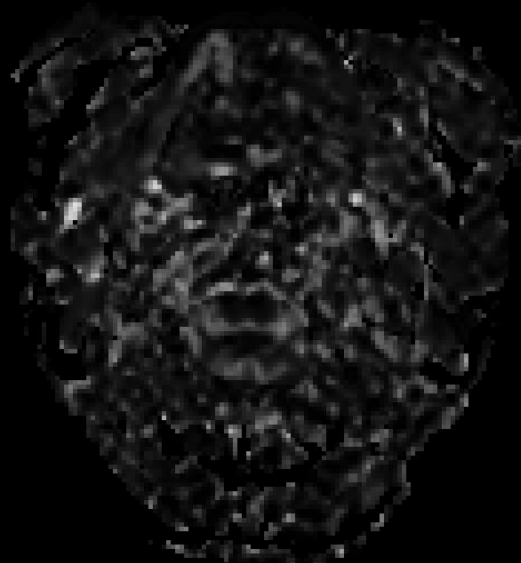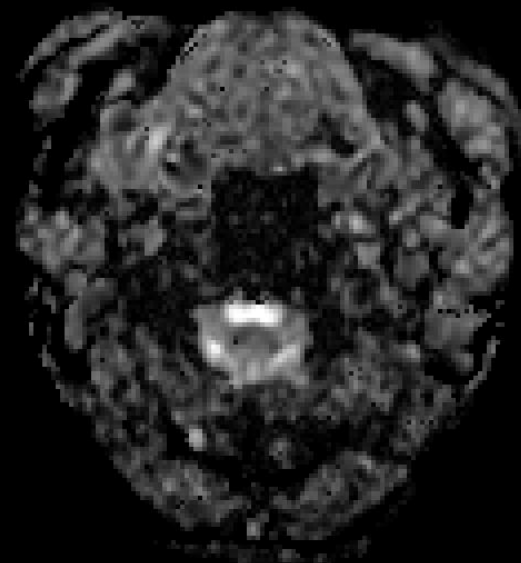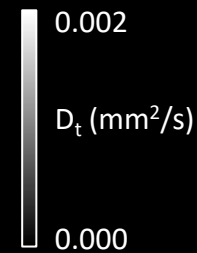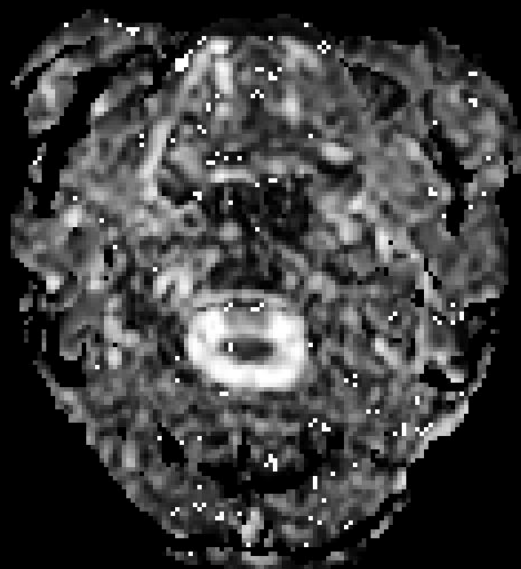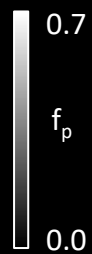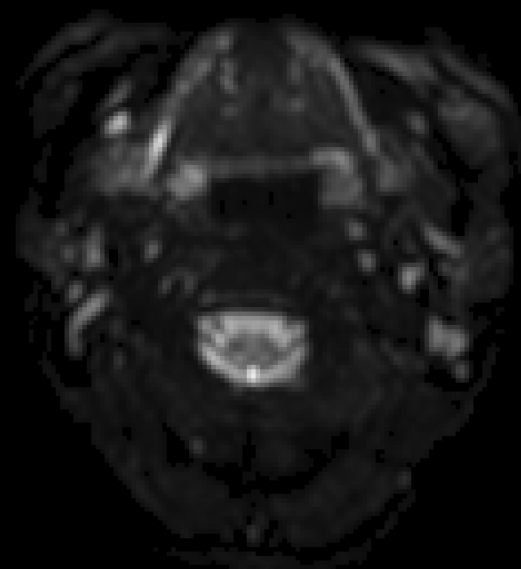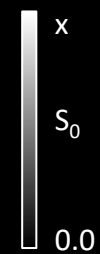

# Network instance 58

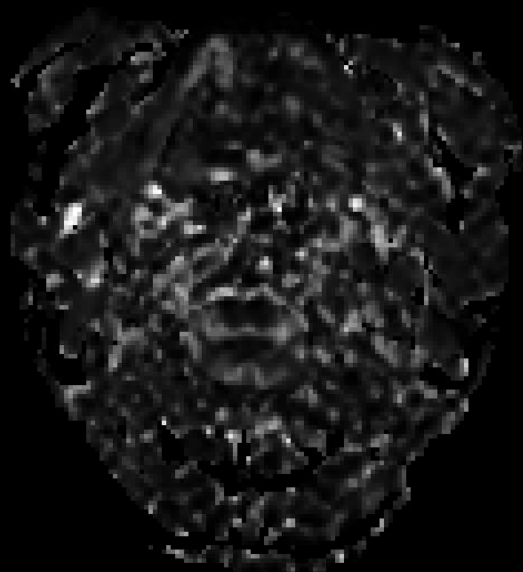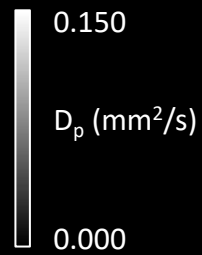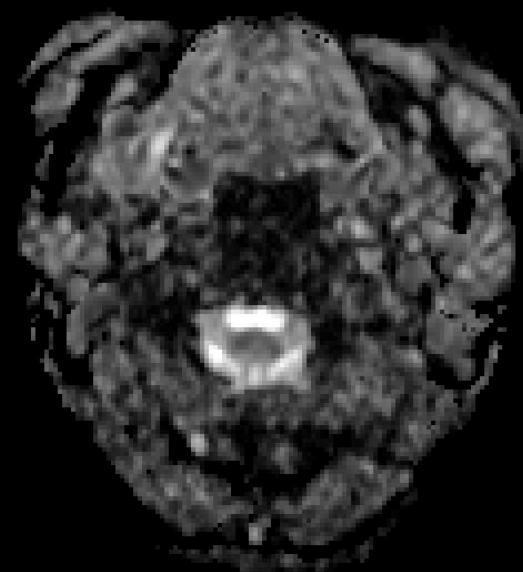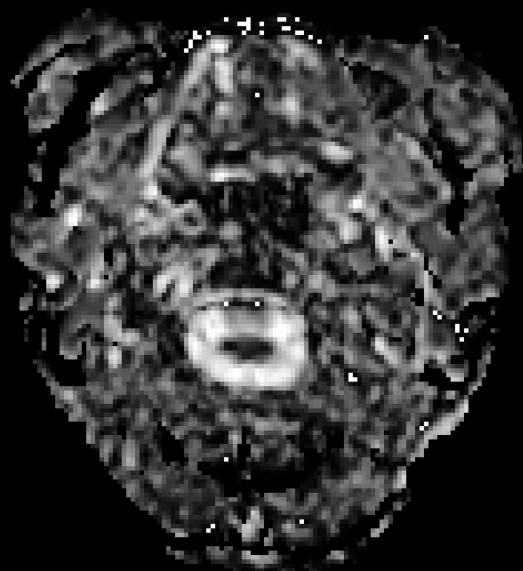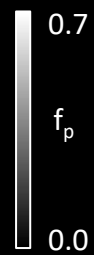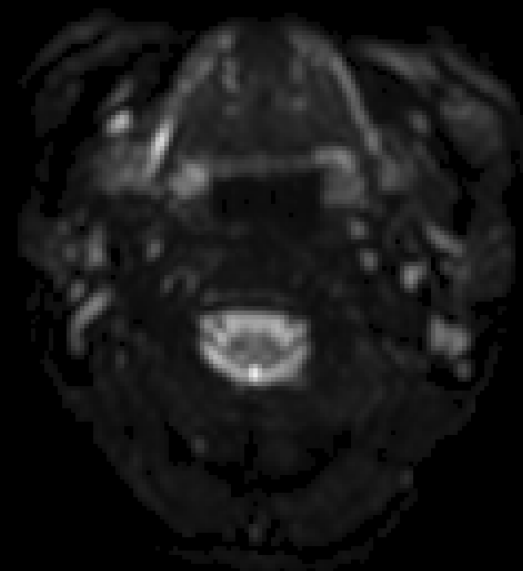

# Network instance 59

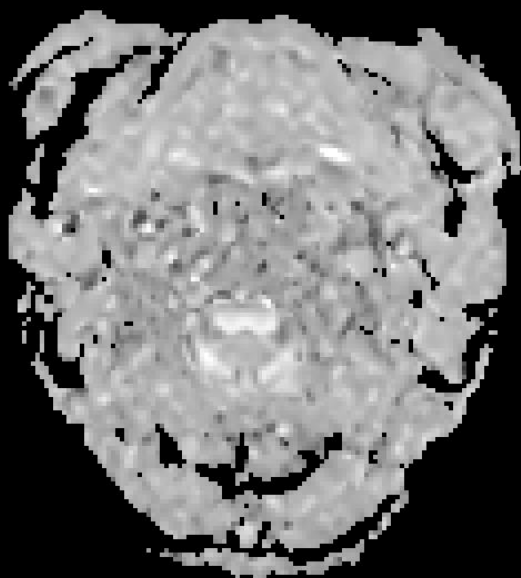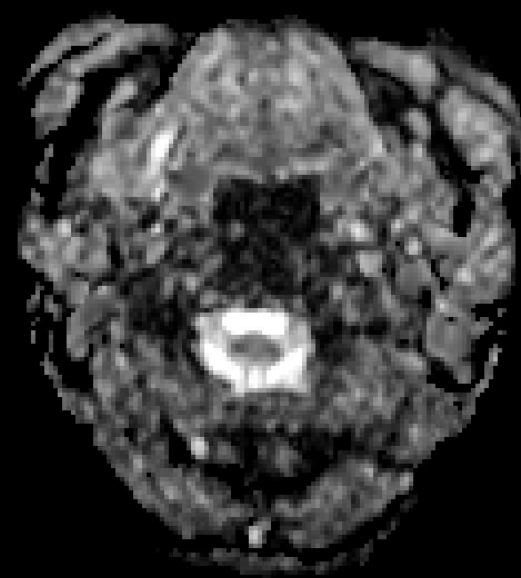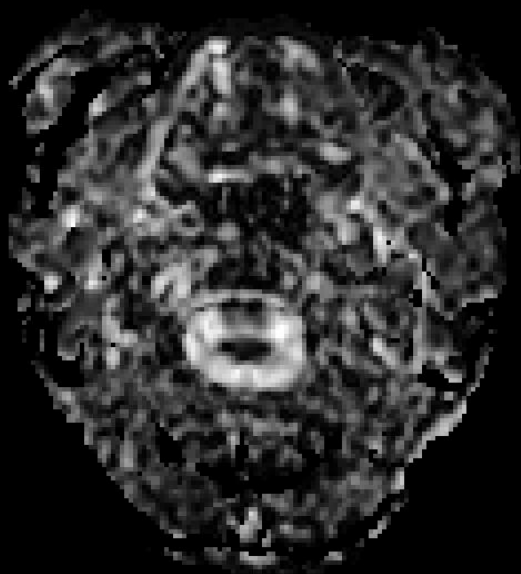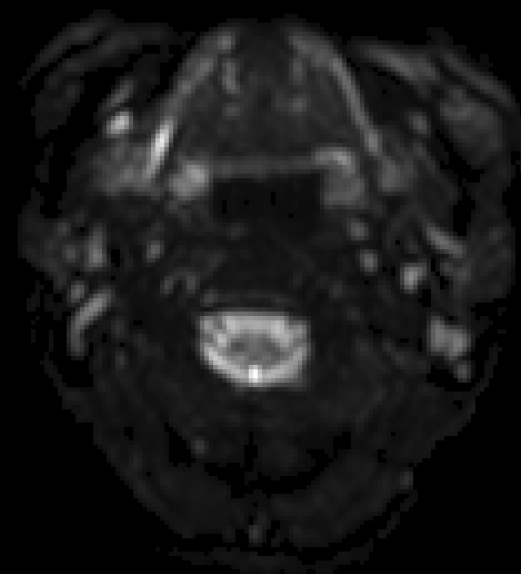



# Network instance 60

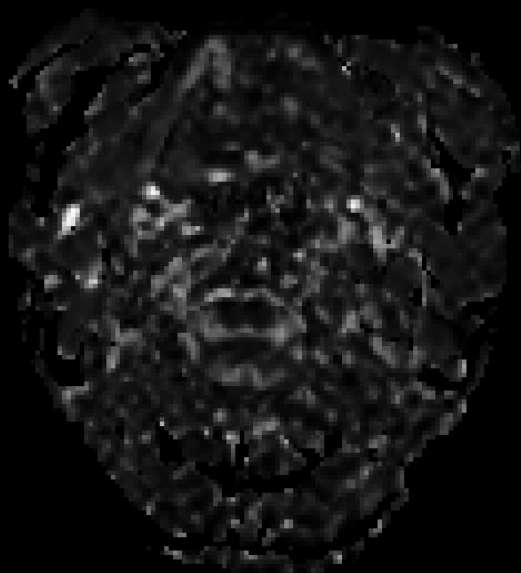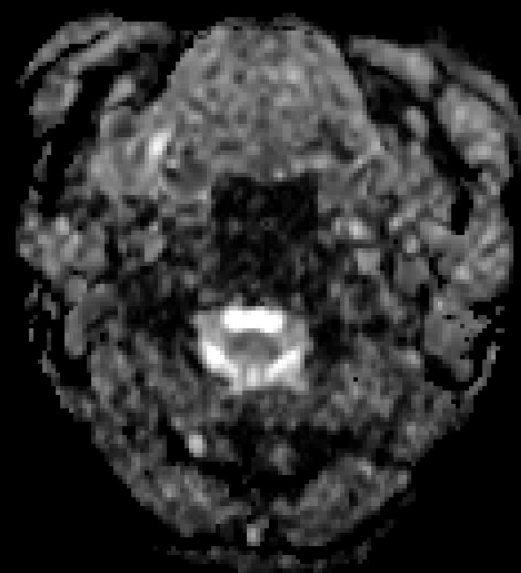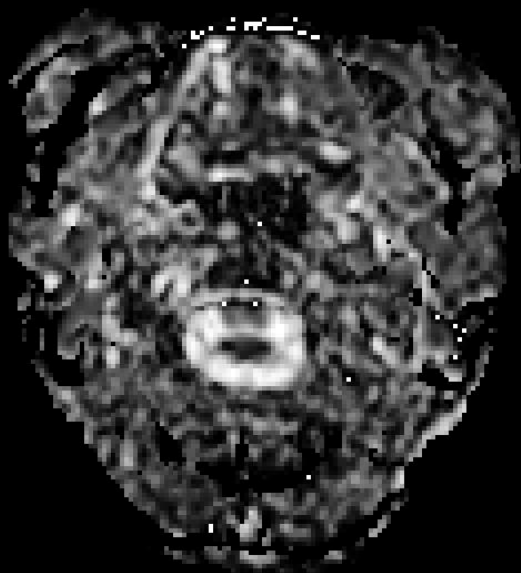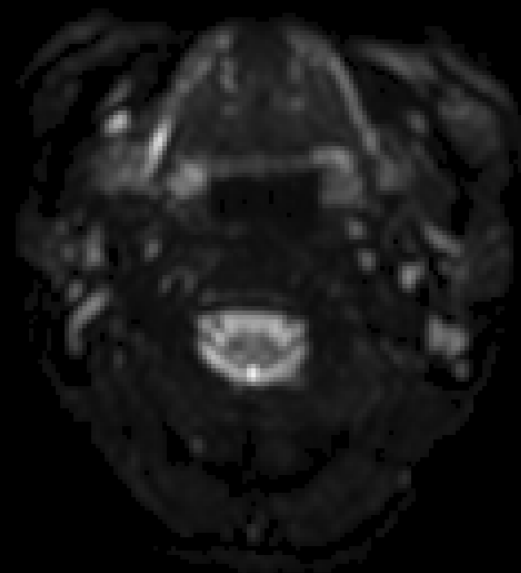

# Network instance 61

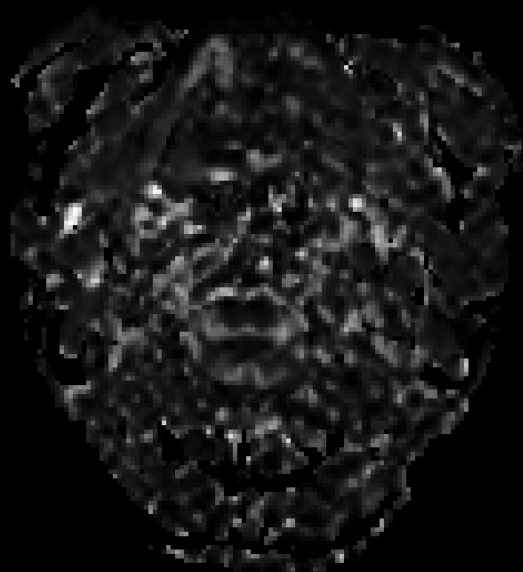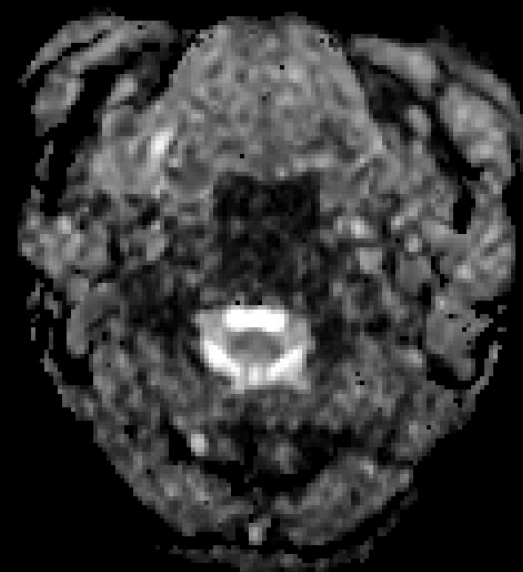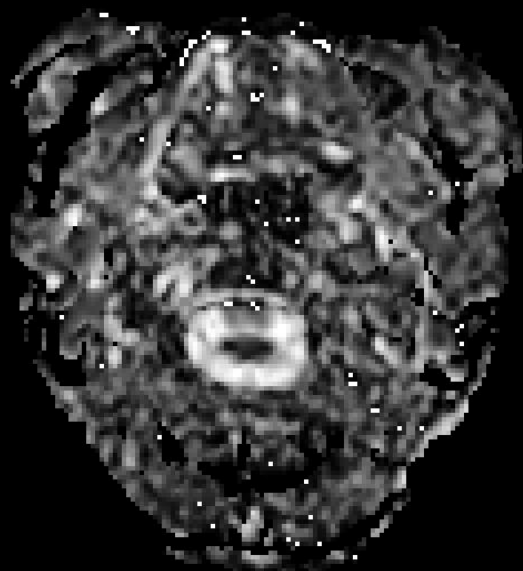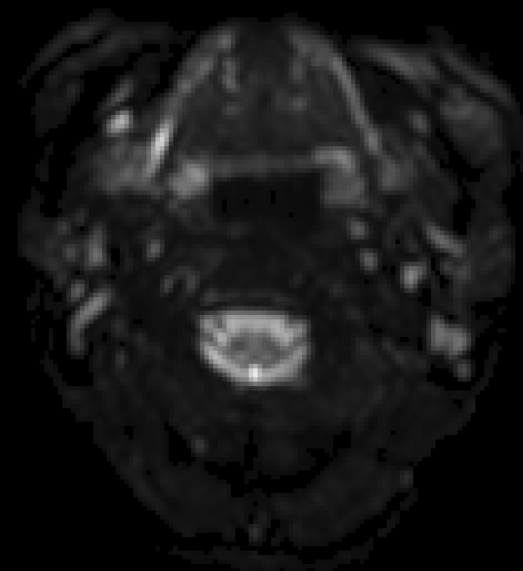

# Network instance 62

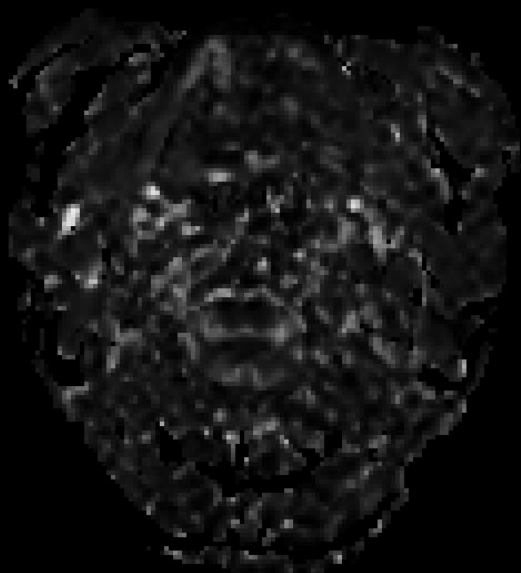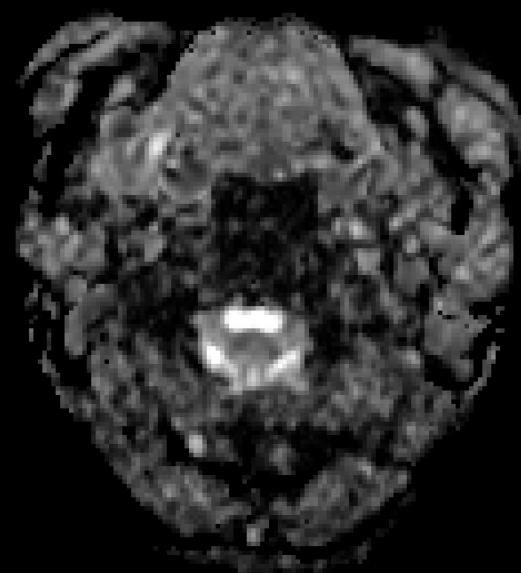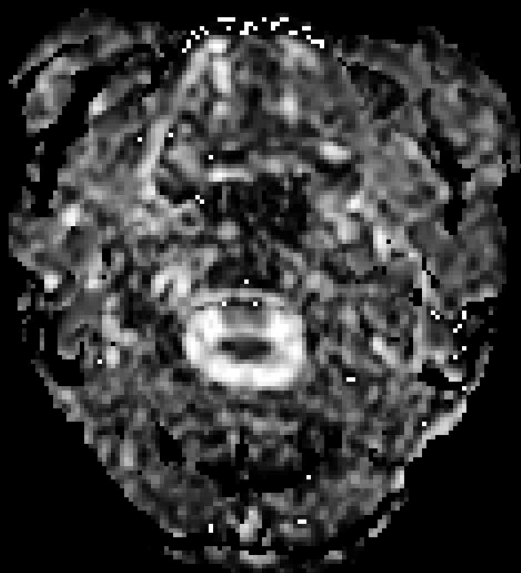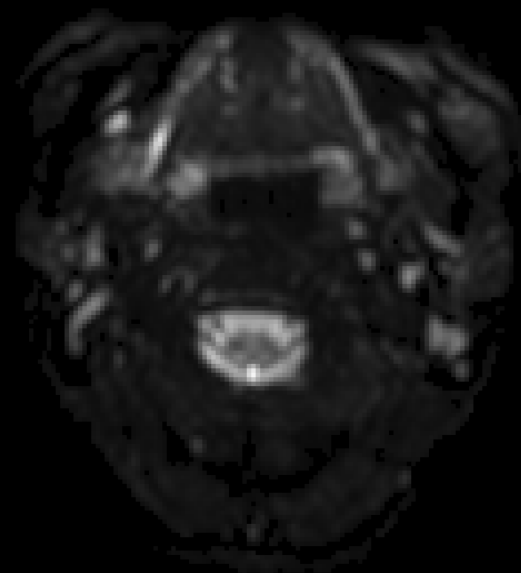

# Network instance 63

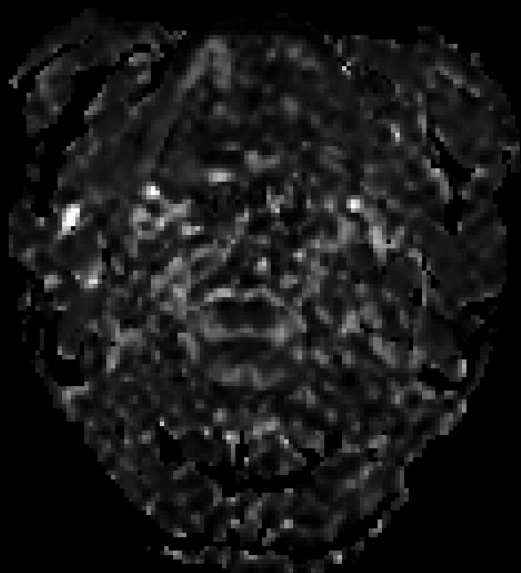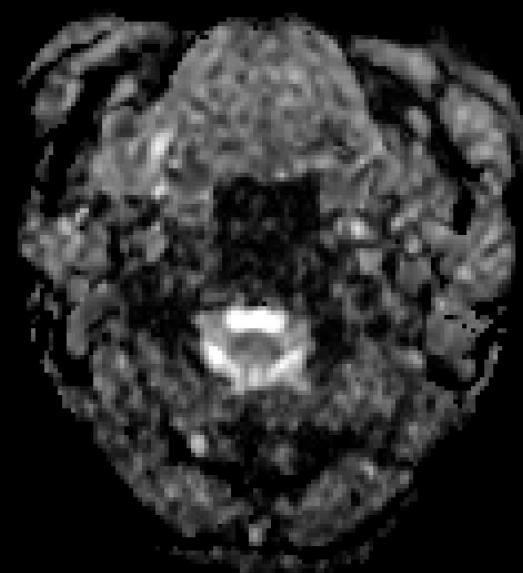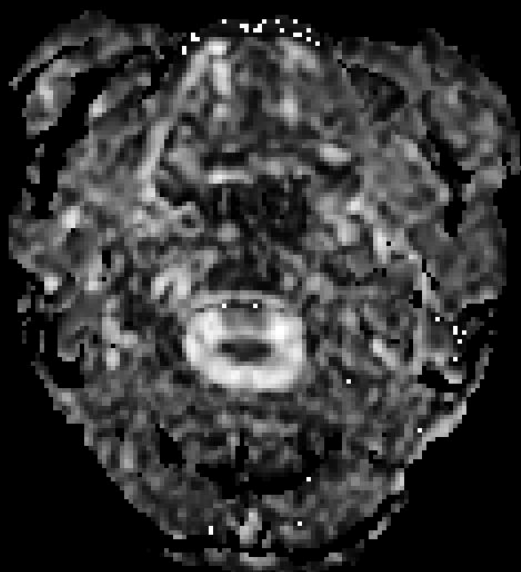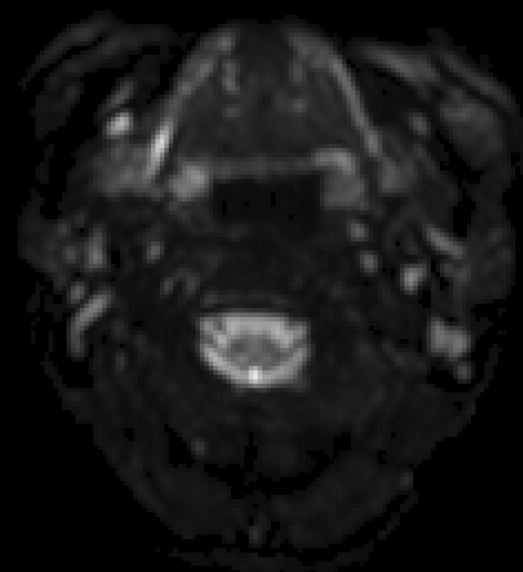

# Network instance 64

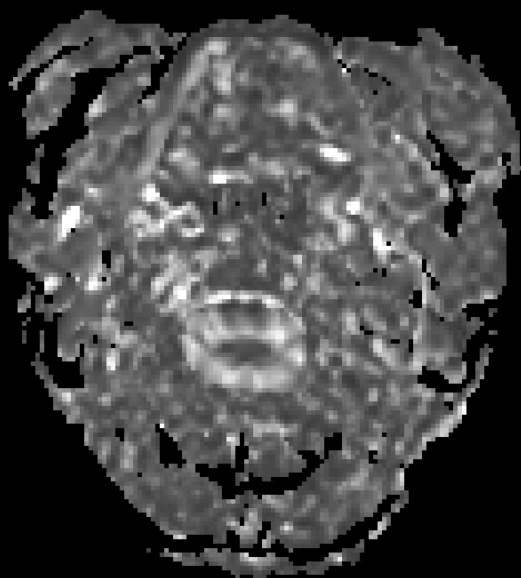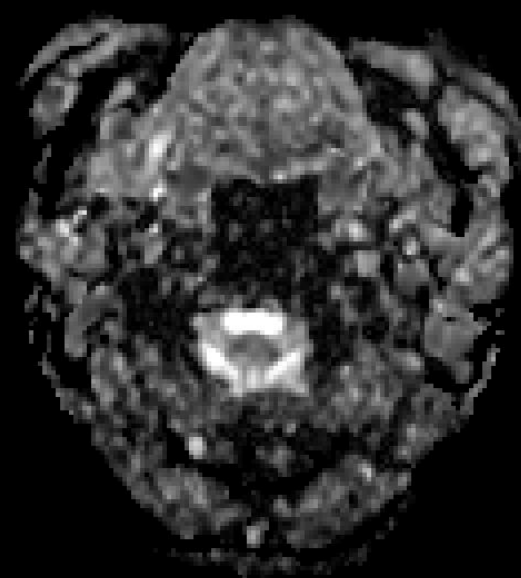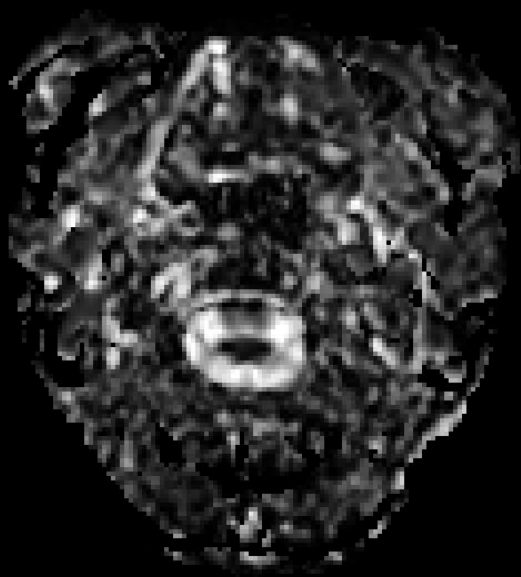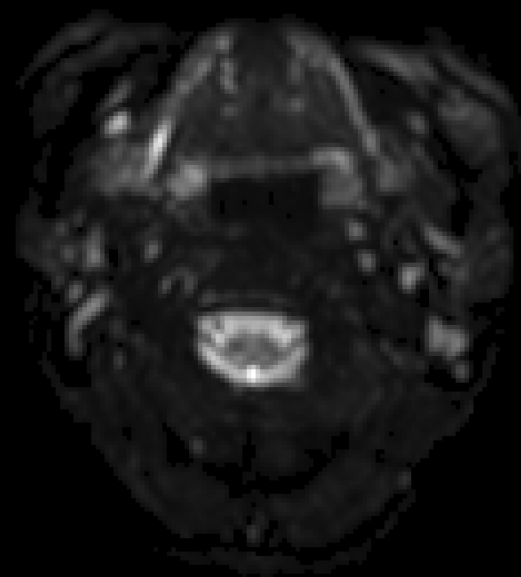

# Network instance 65

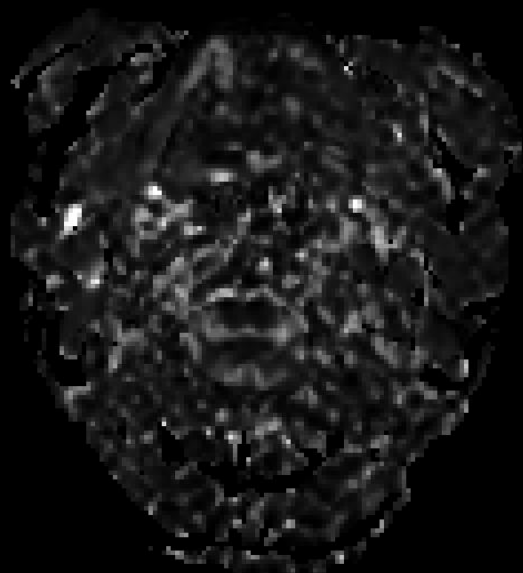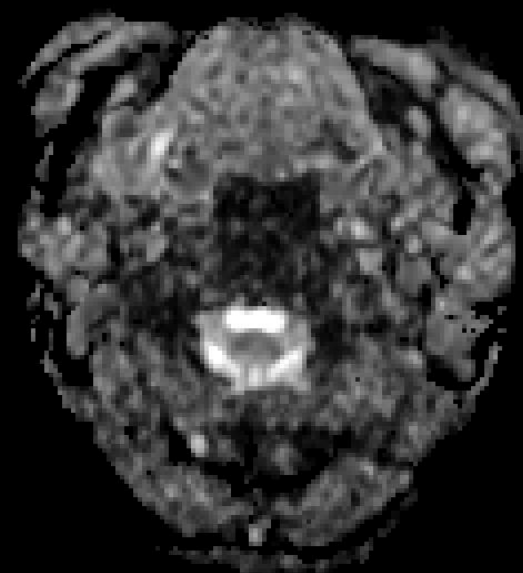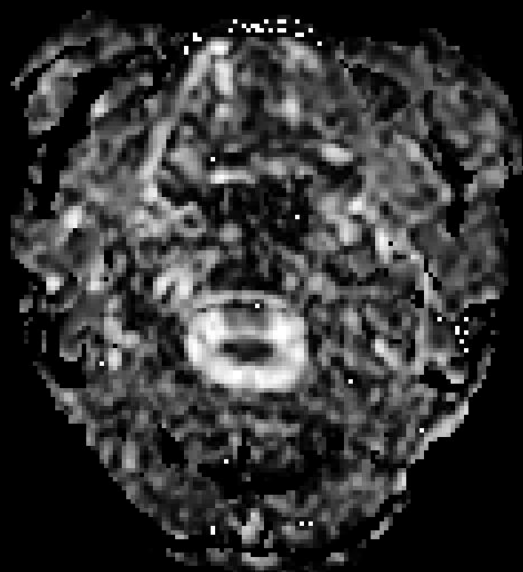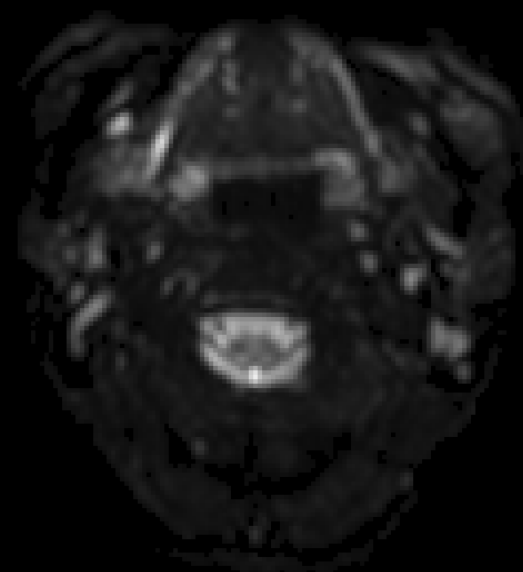

# Network instance 66

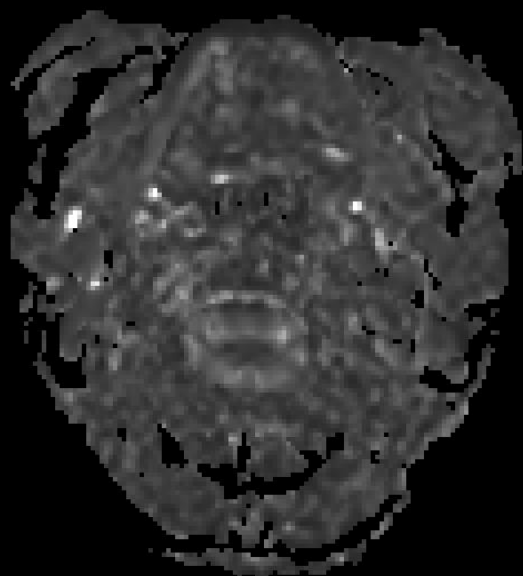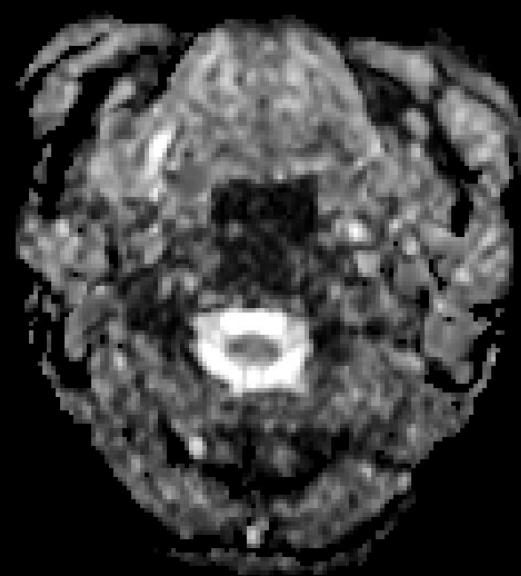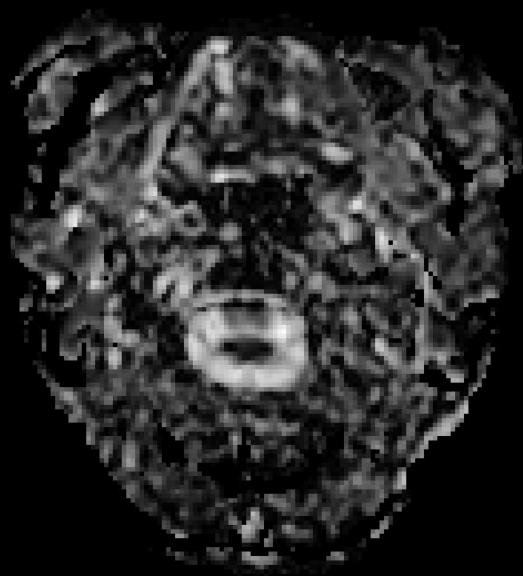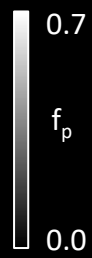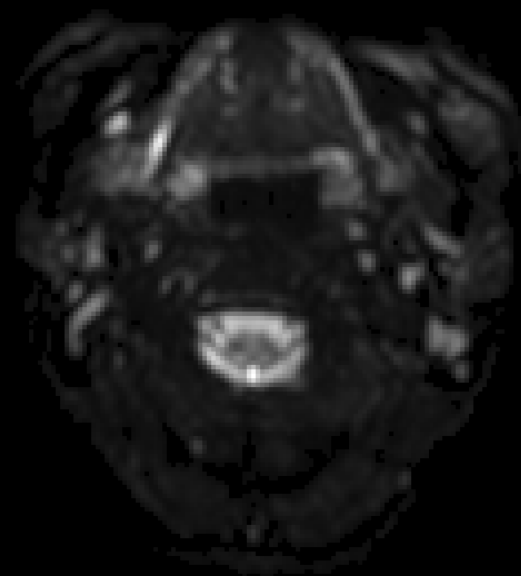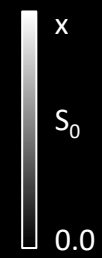

# Network instance 67

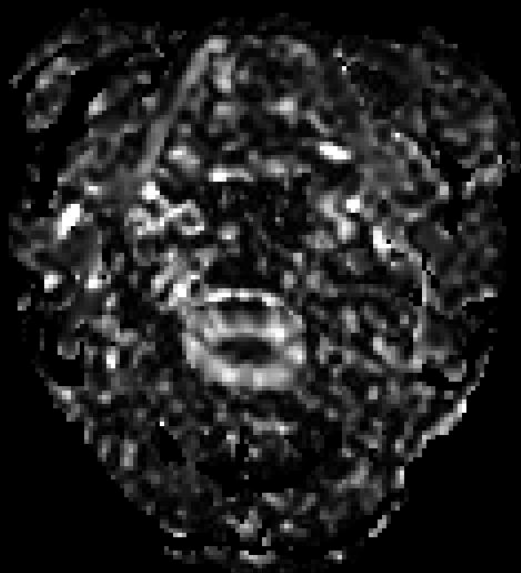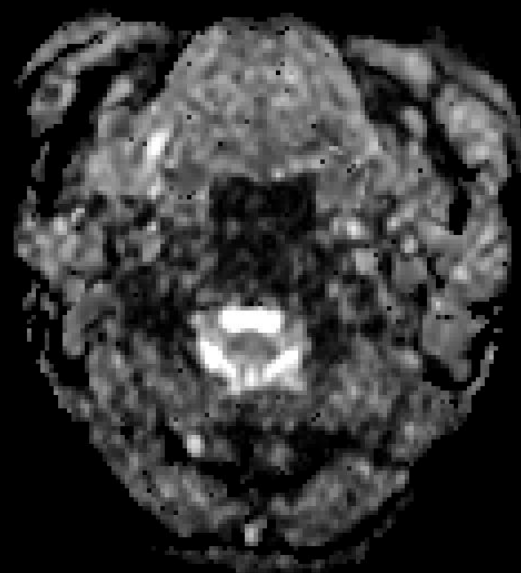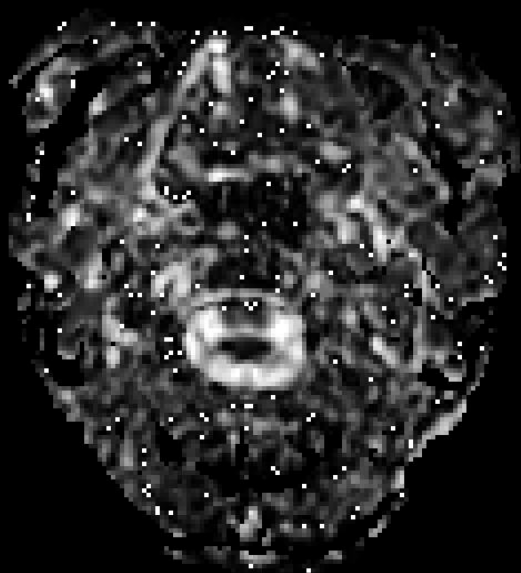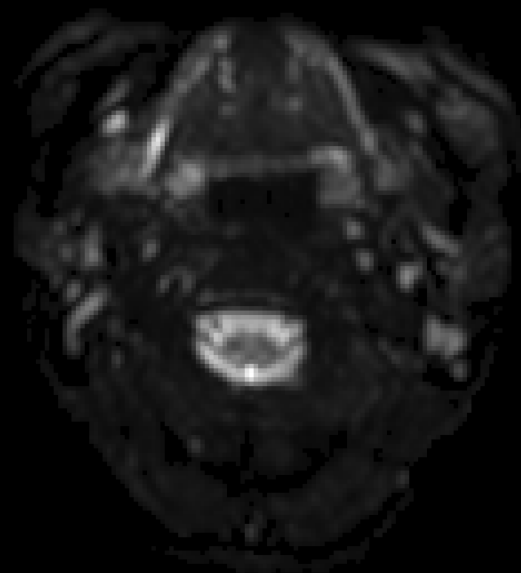



# Network instance 68

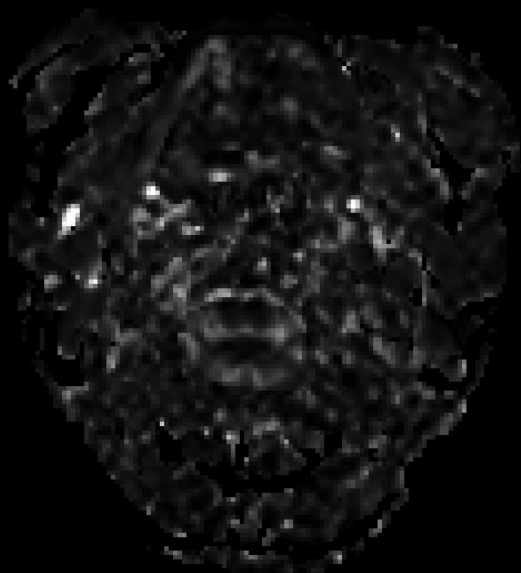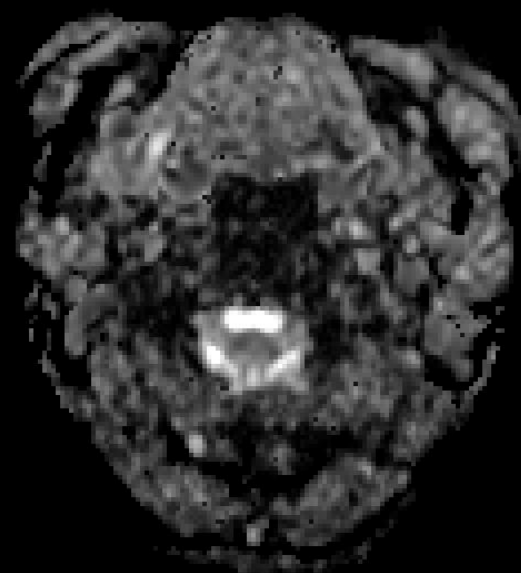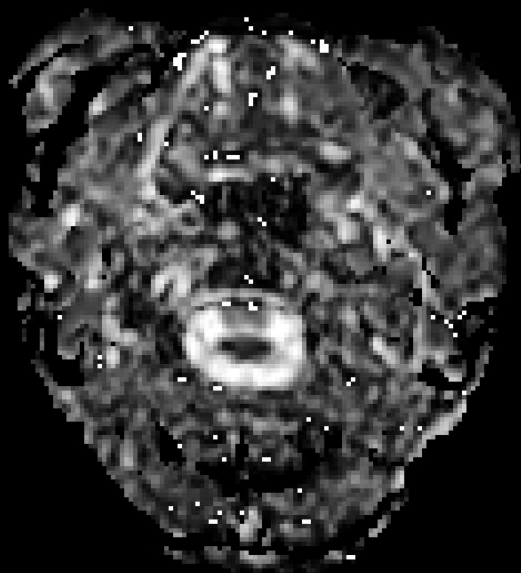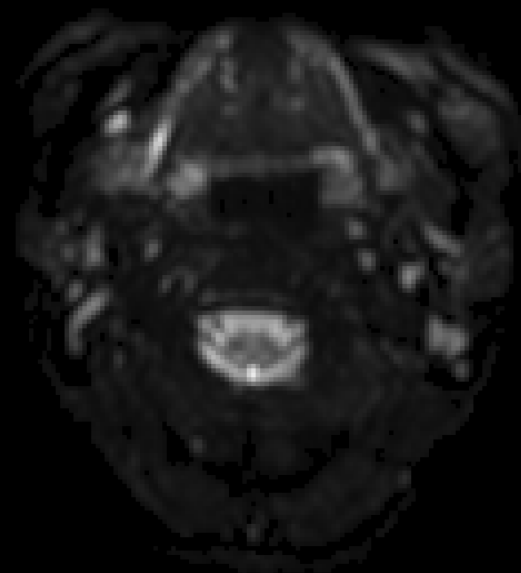

# Network instance 69

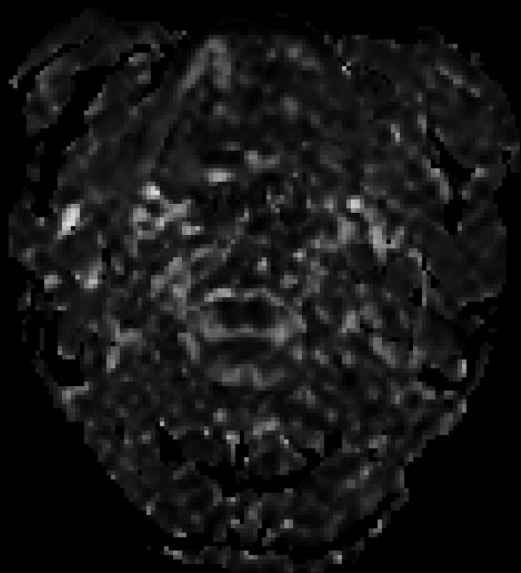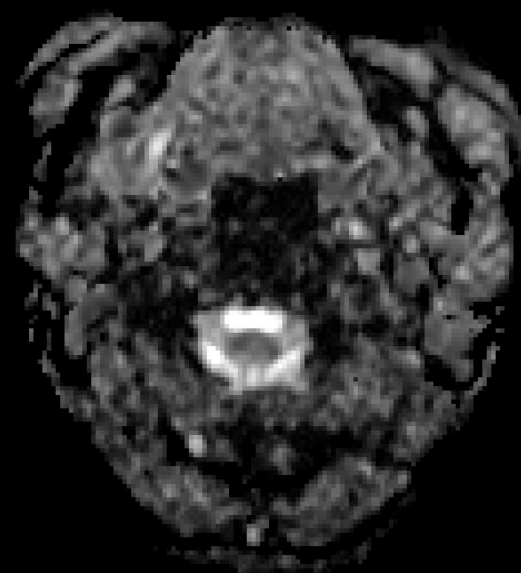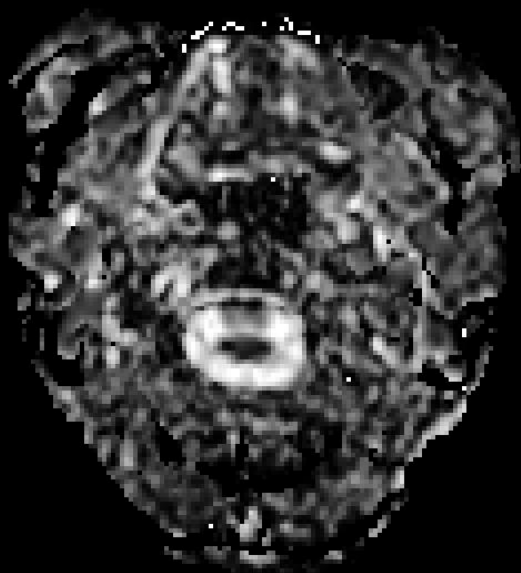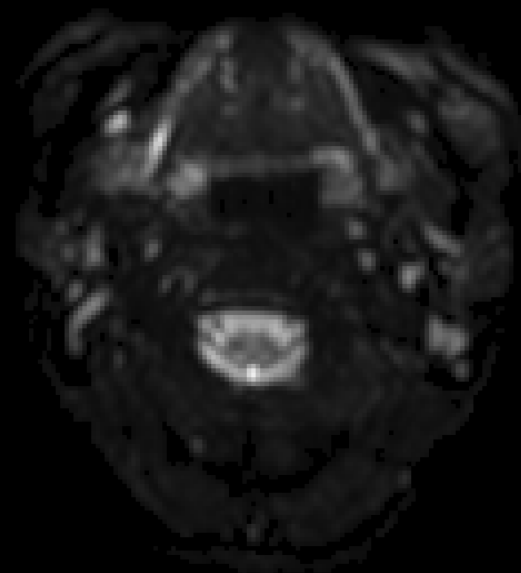

# Network instance 70

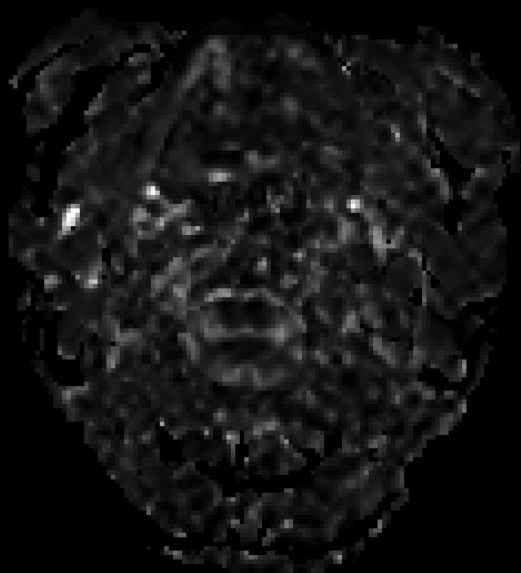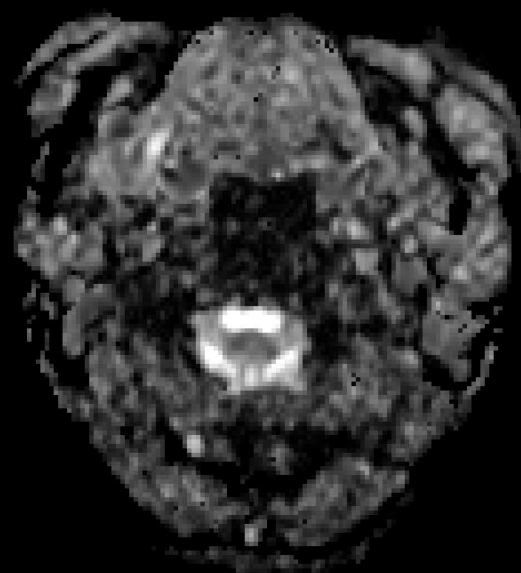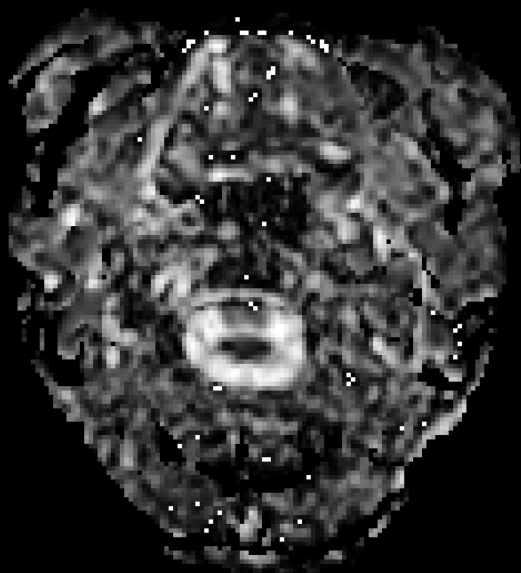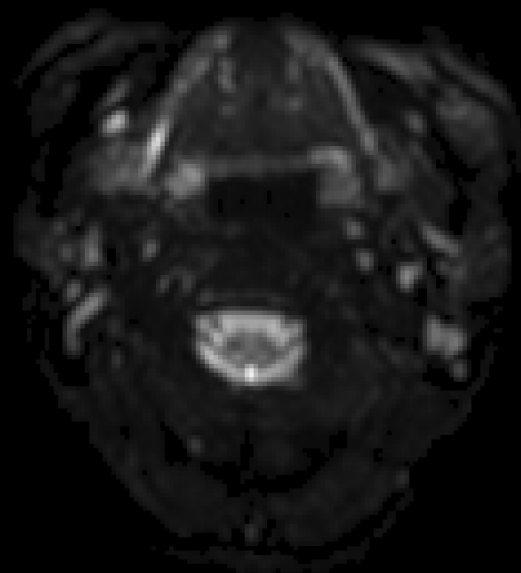

# Network instance 71

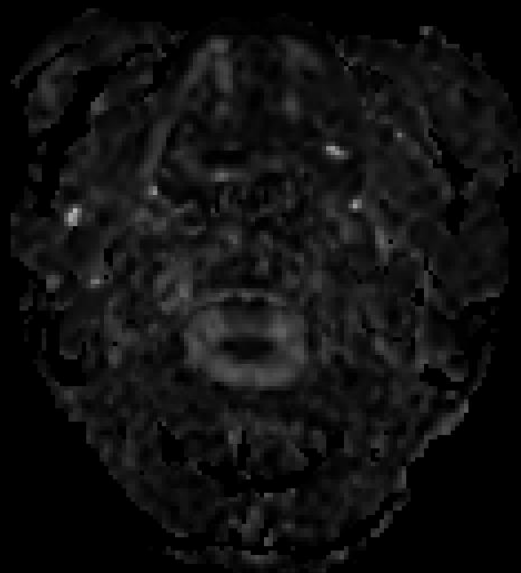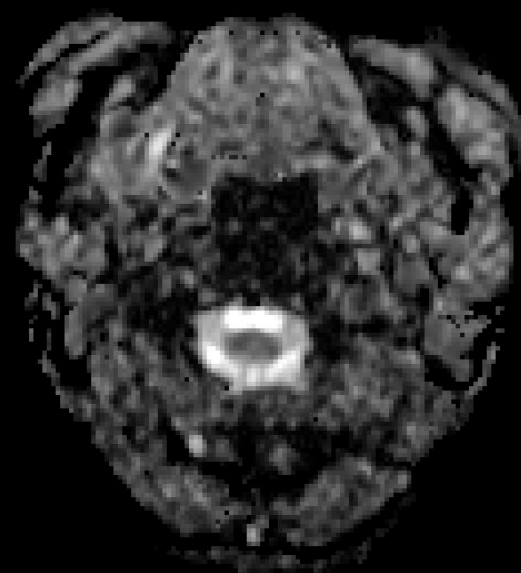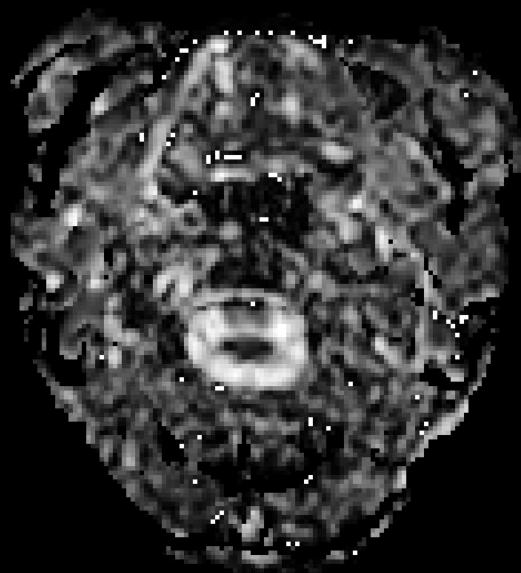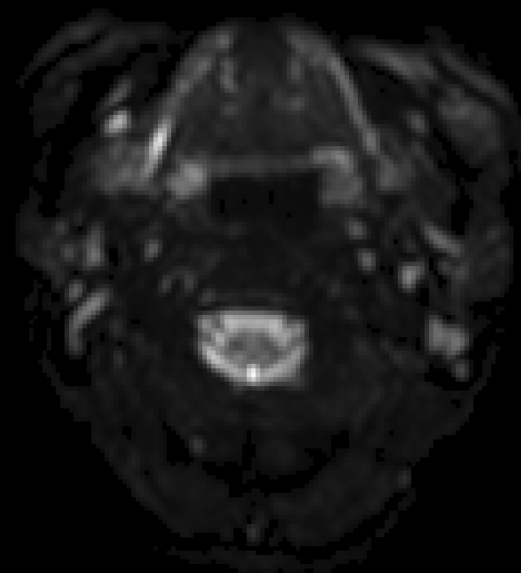

# Network instance 72

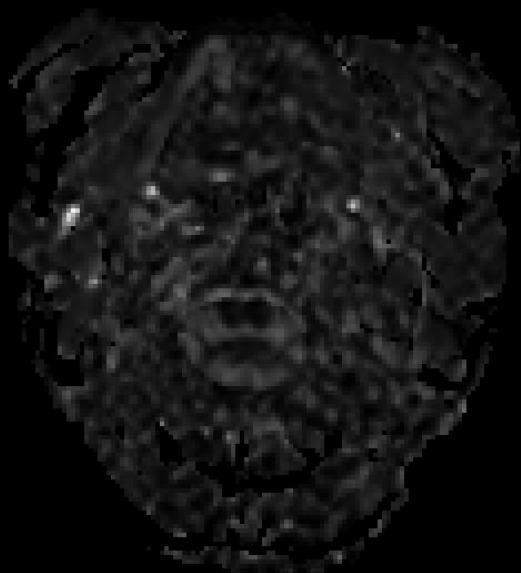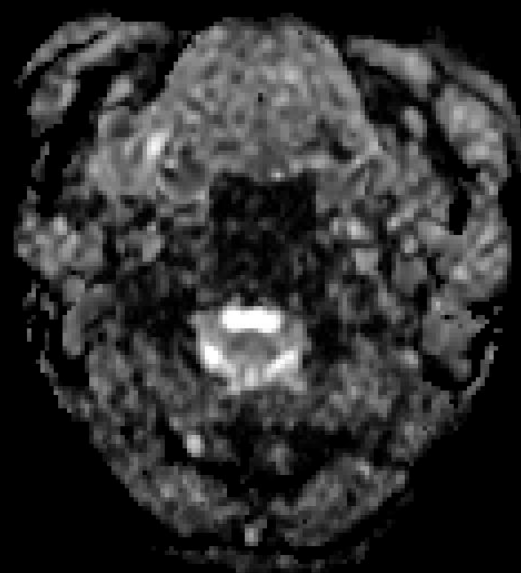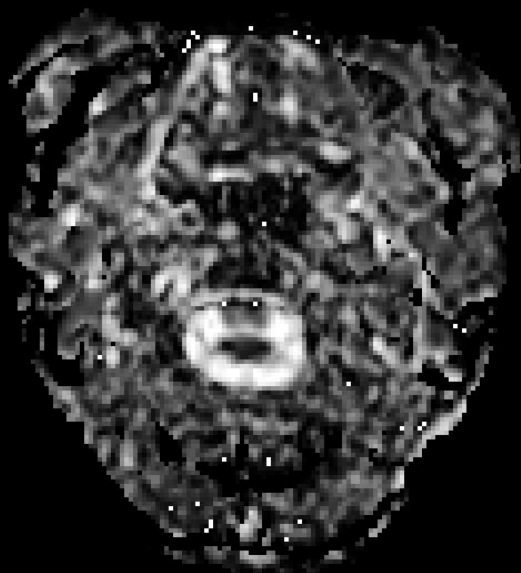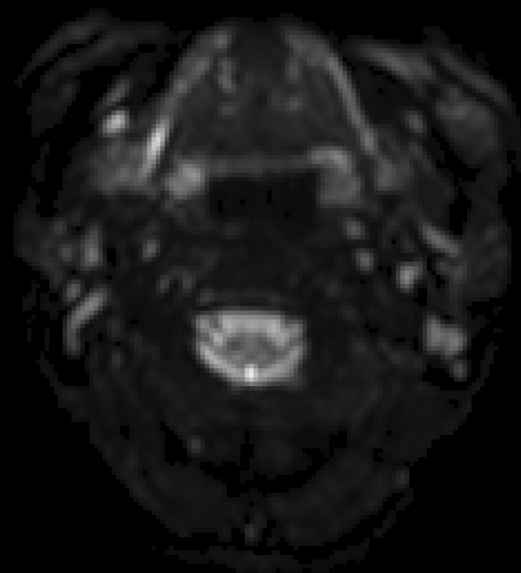

# Network instance 73

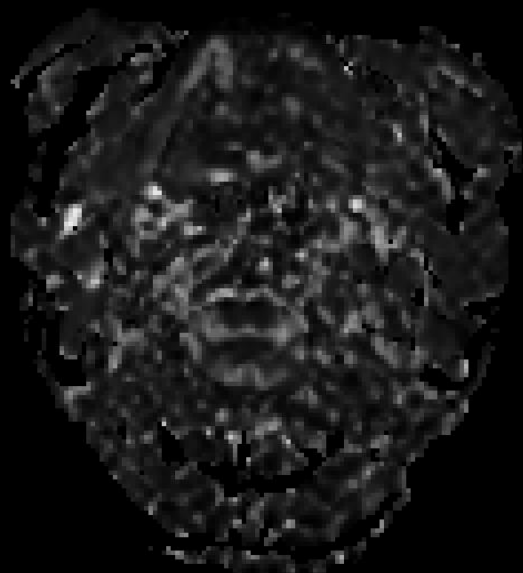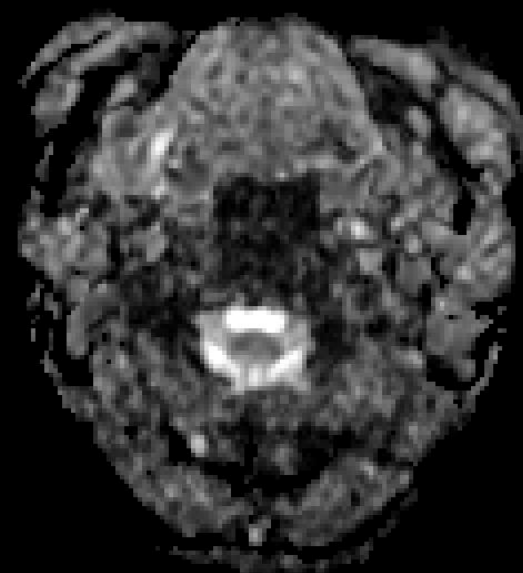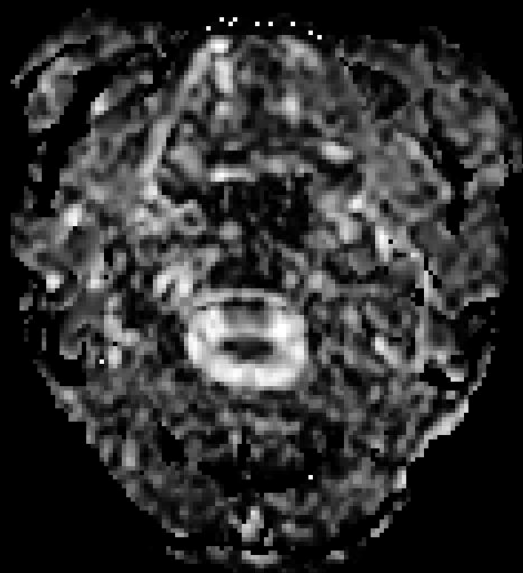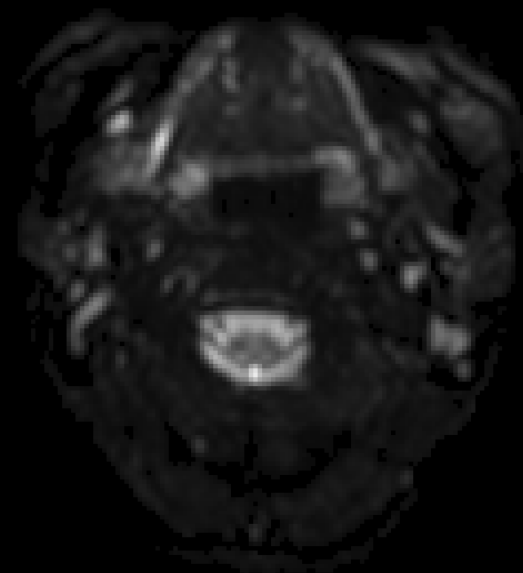

# Network instance 74

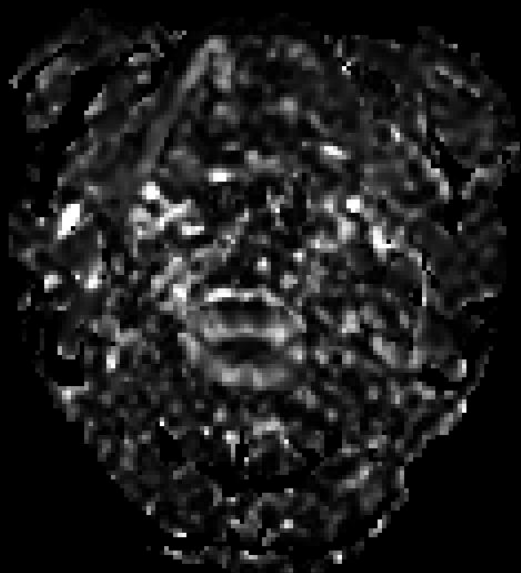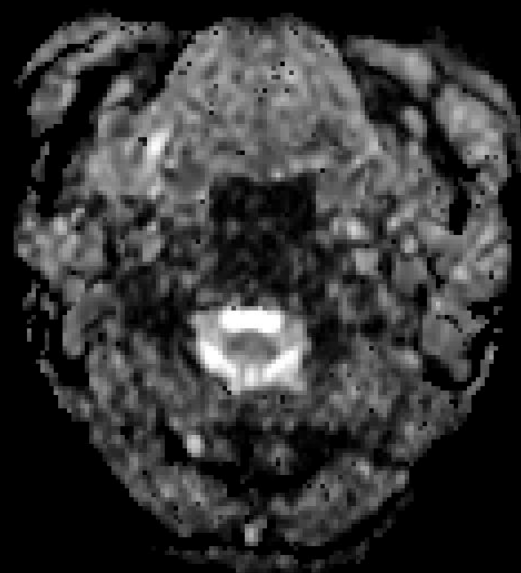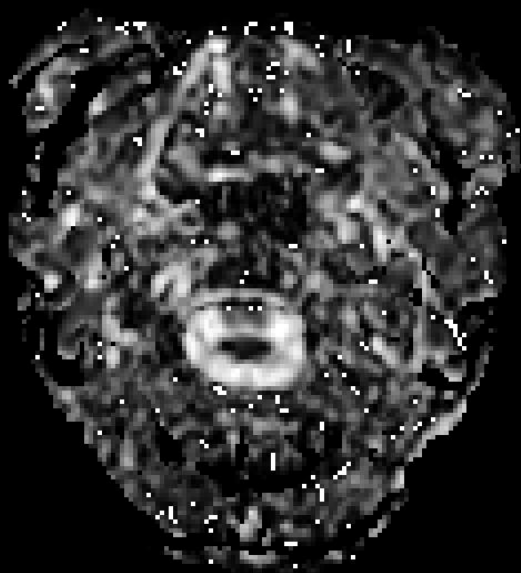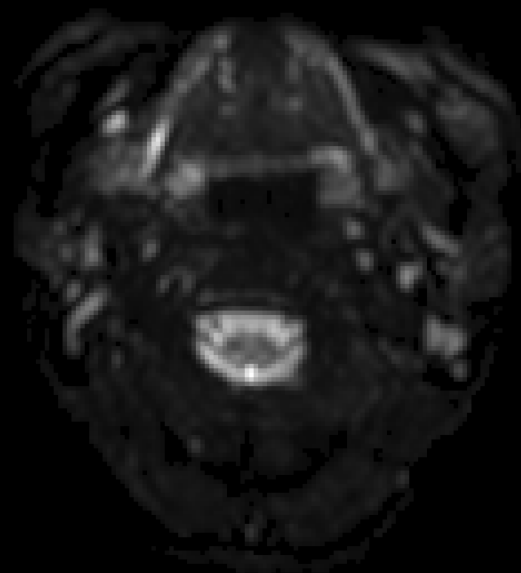

# Network instance 75

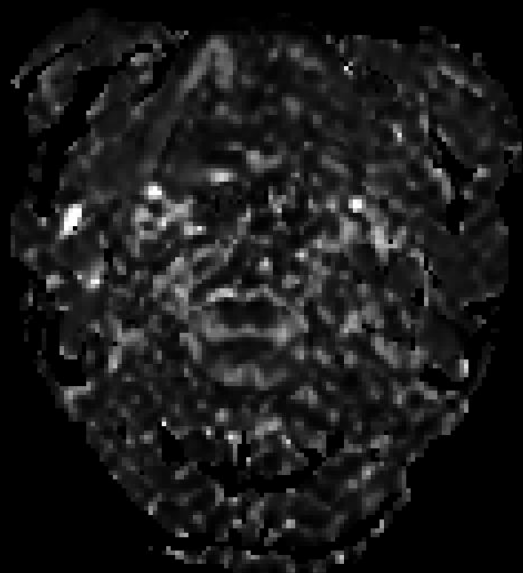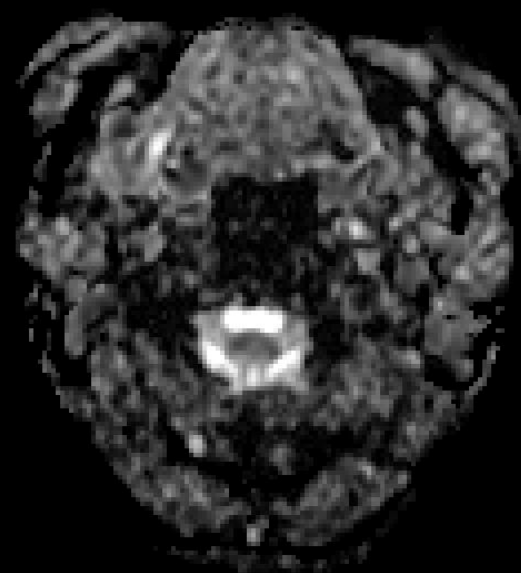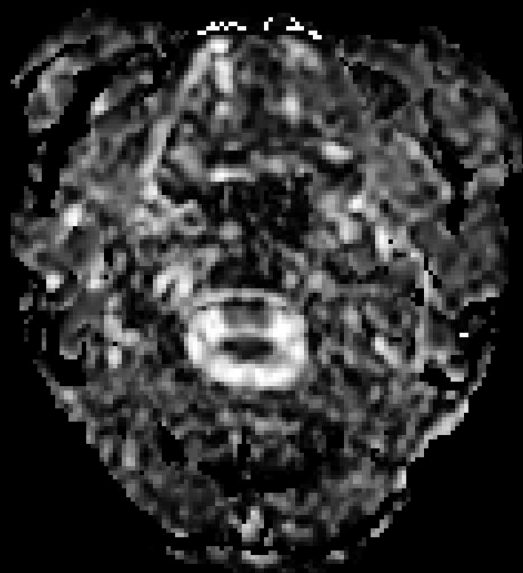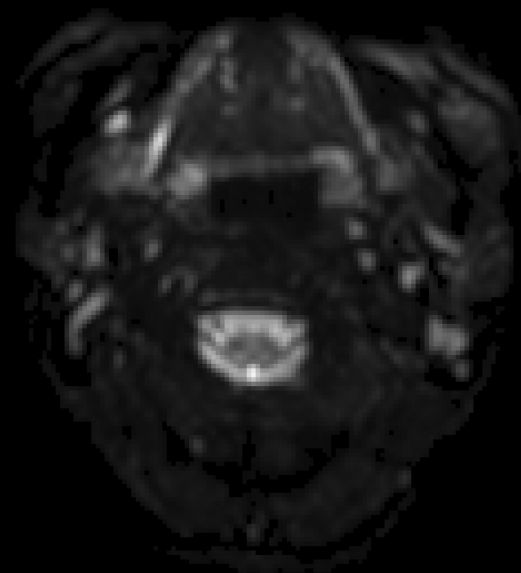



# Network instance 76

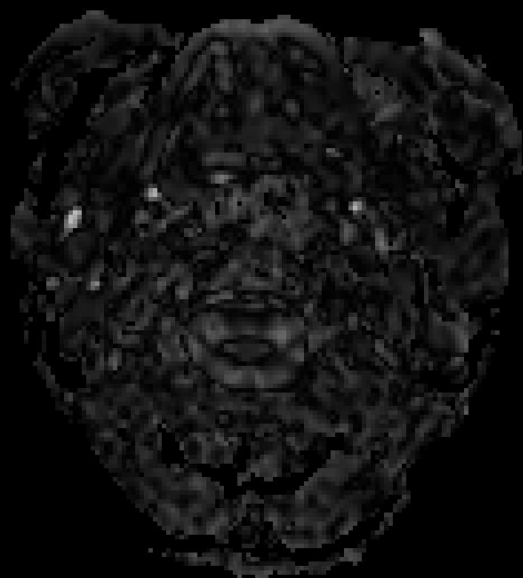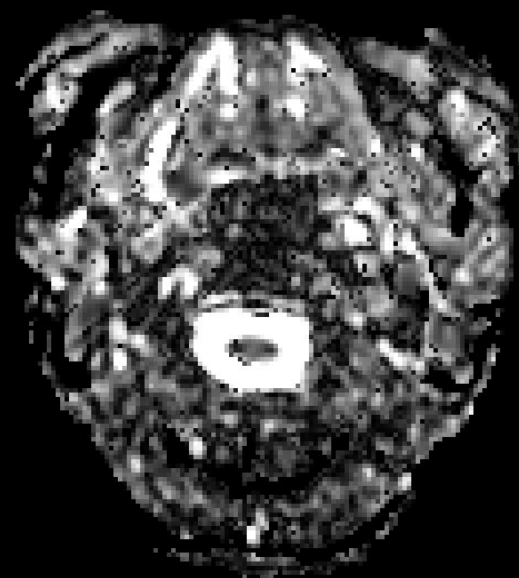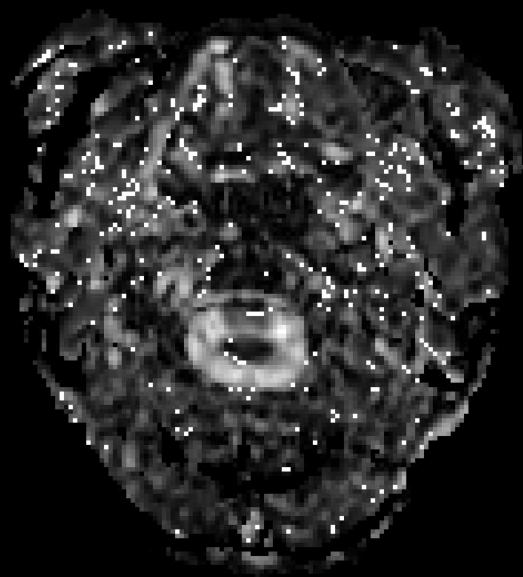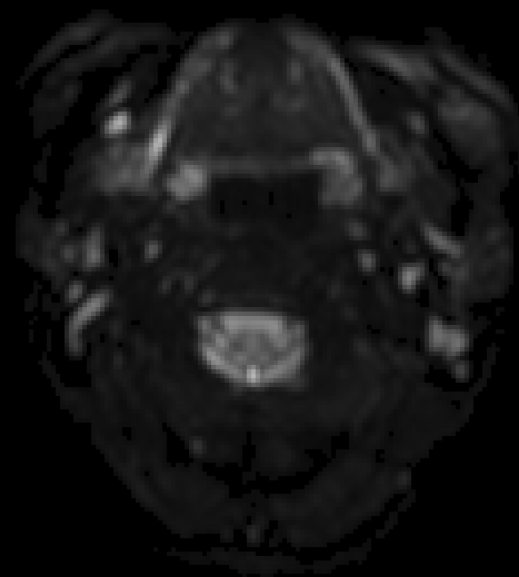

Network instance 77

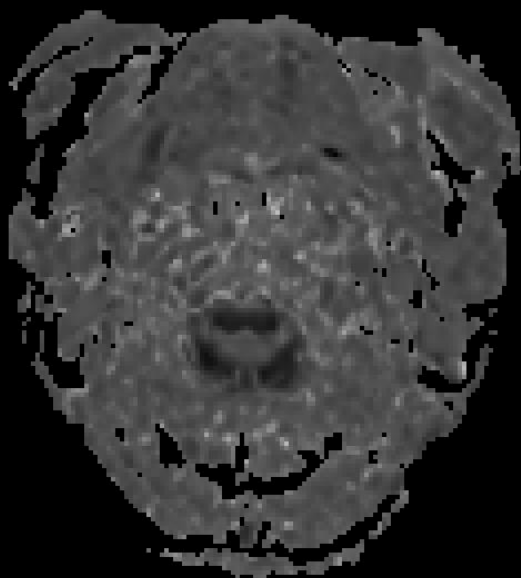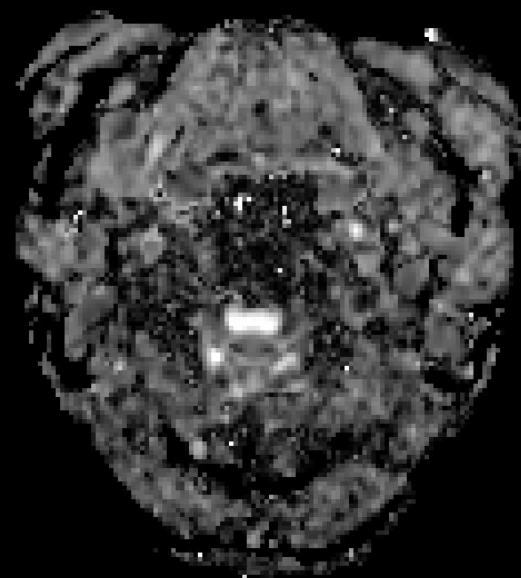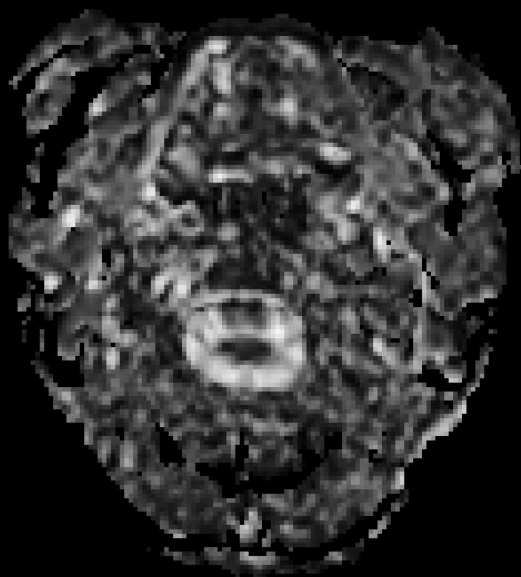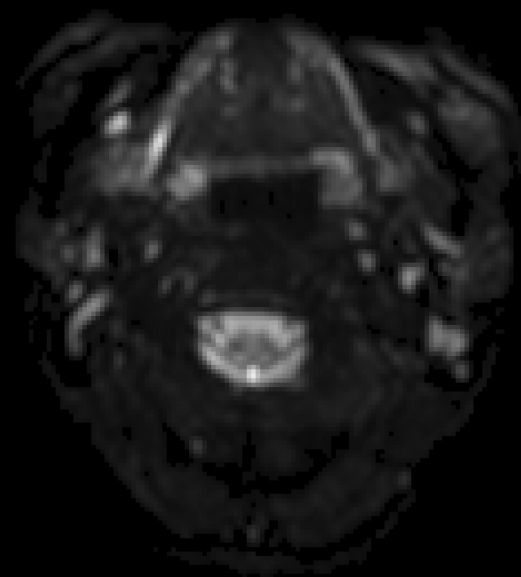

# Network instance 78

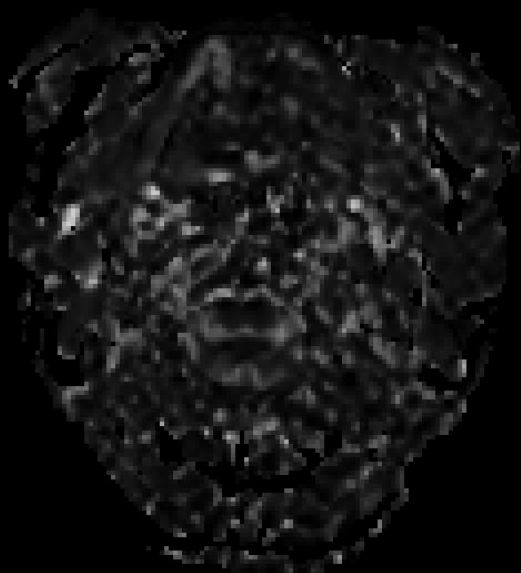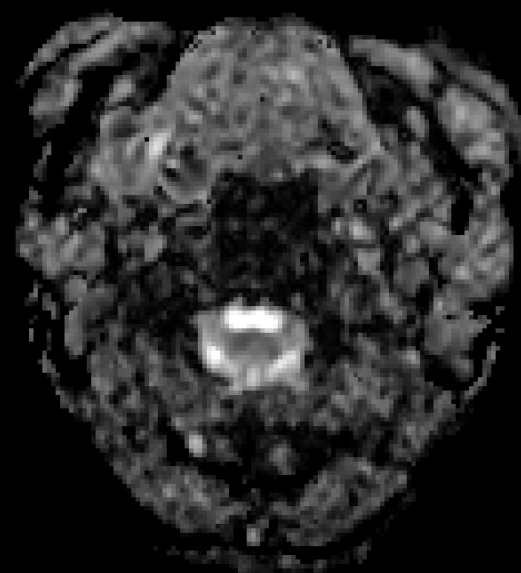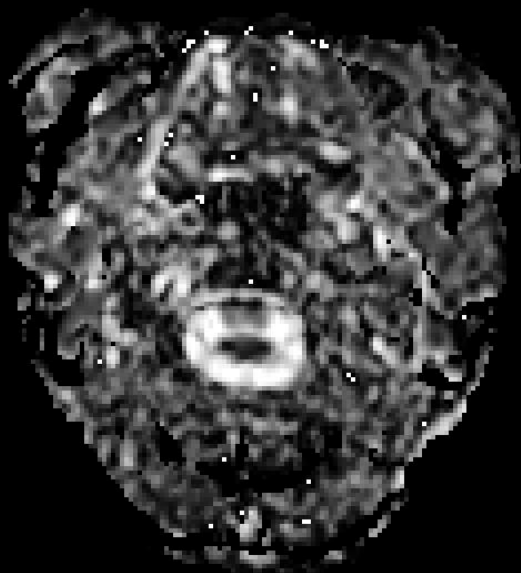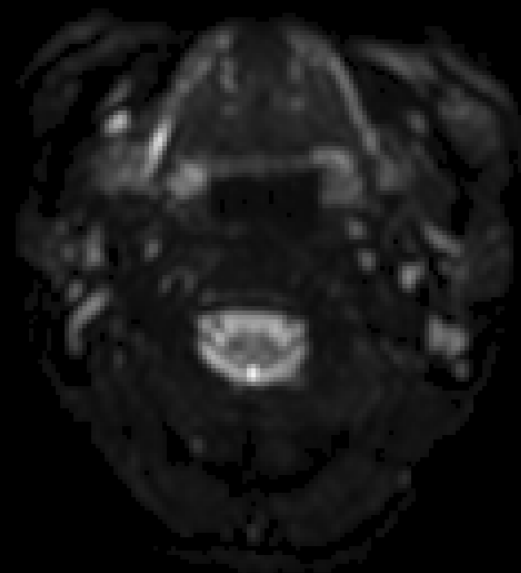

# Network instance 79

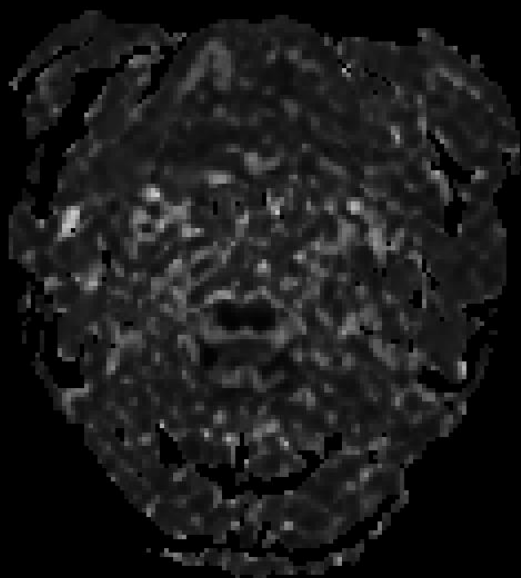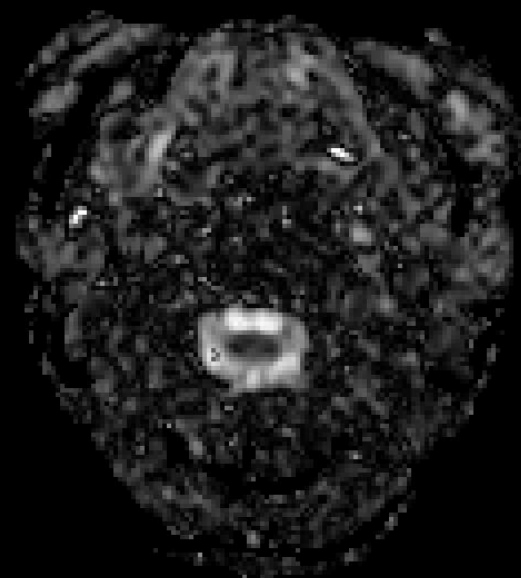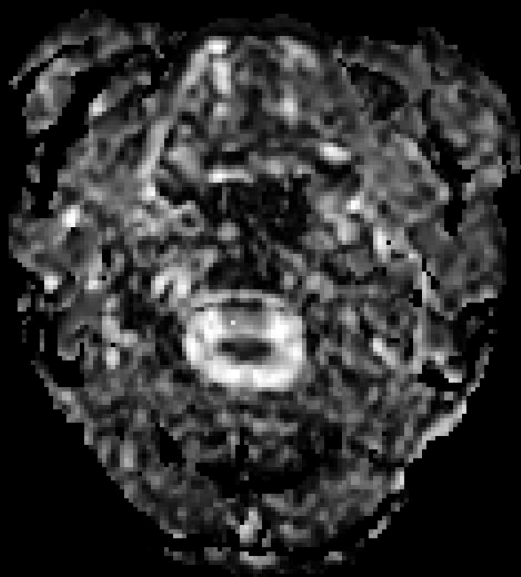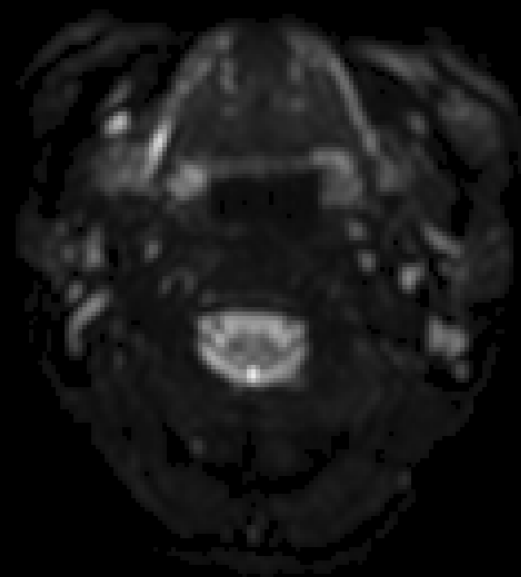

# Network instance 80

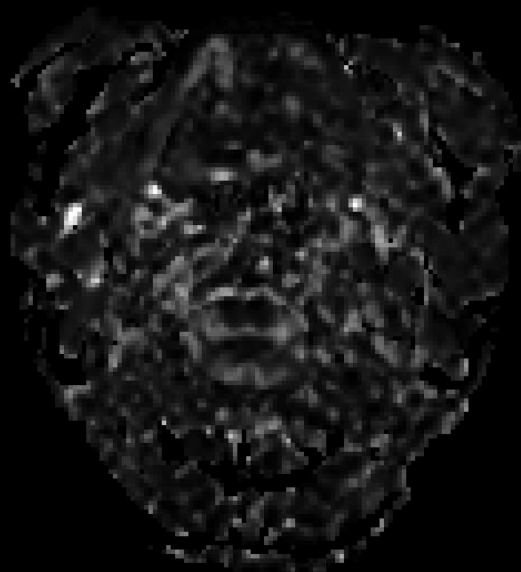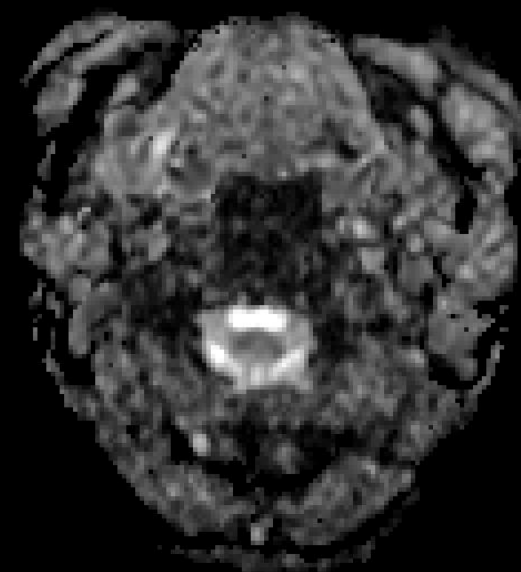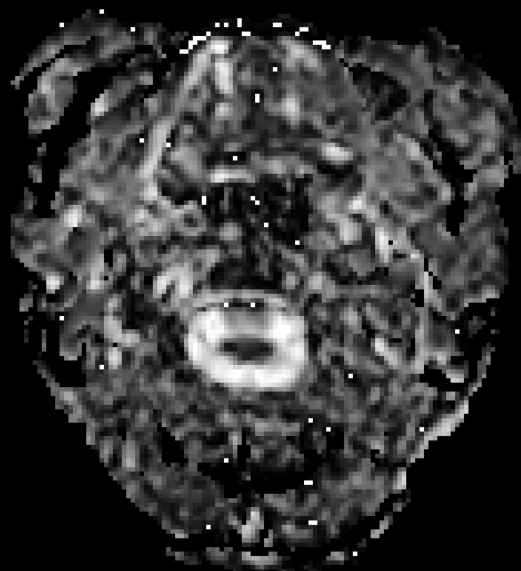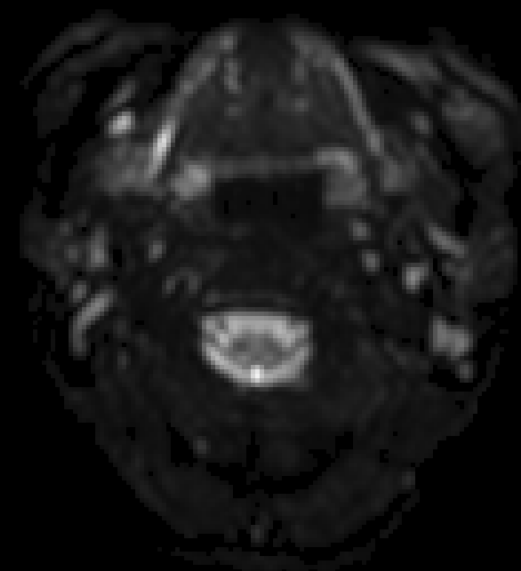

# Network instance 81

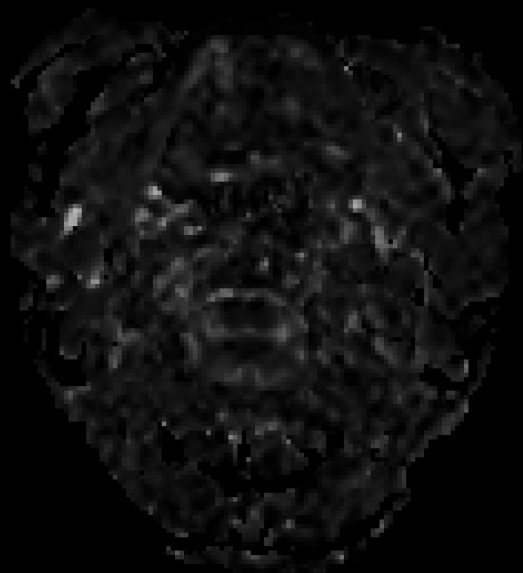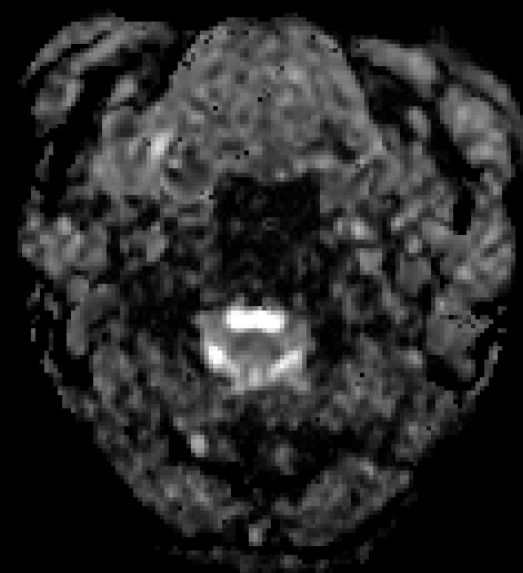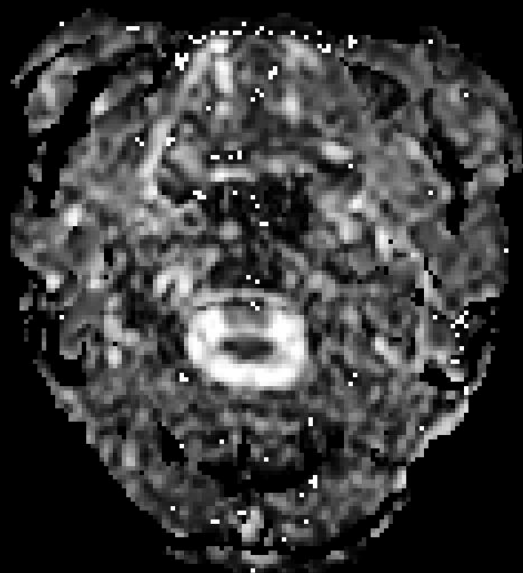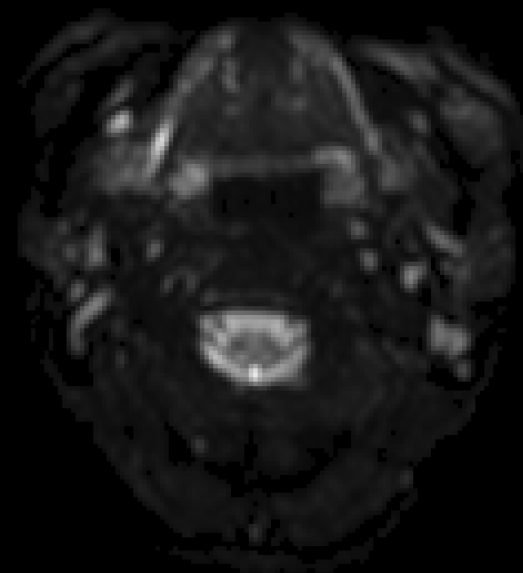

# Network instance 82

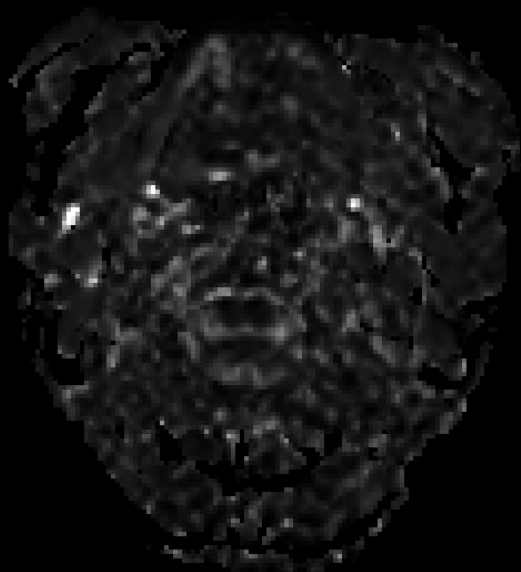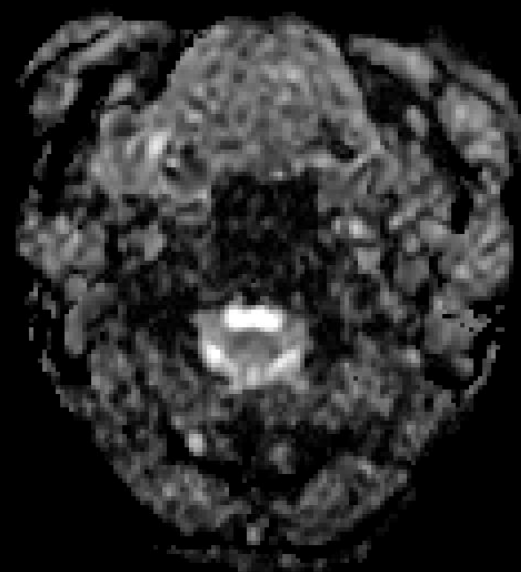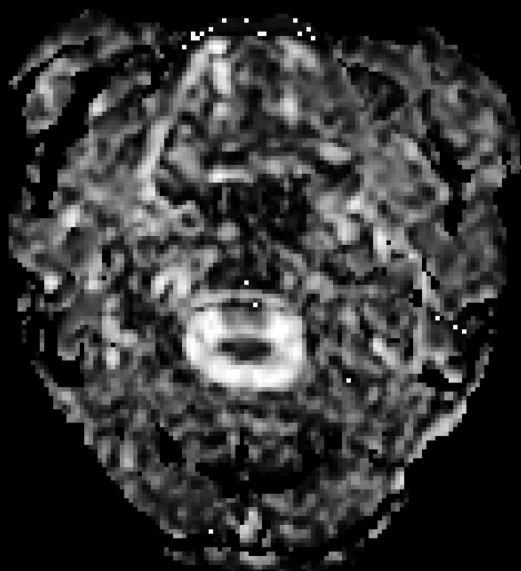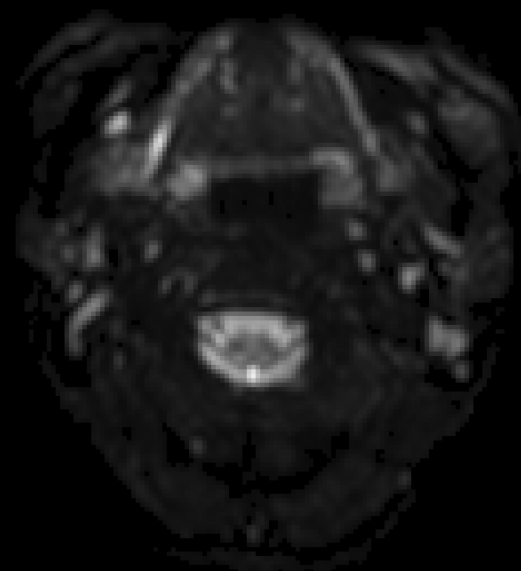

# Network instance 83

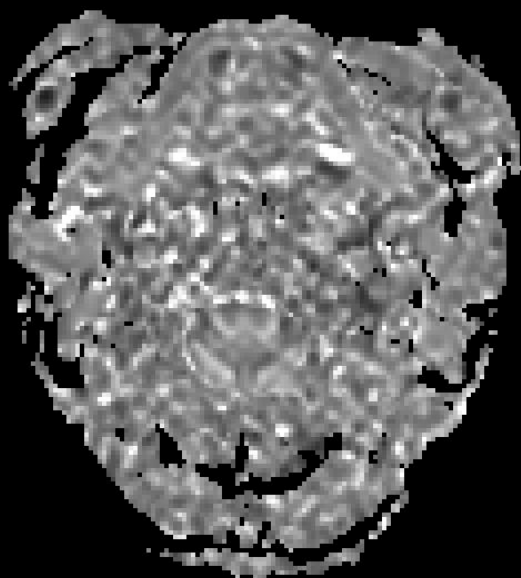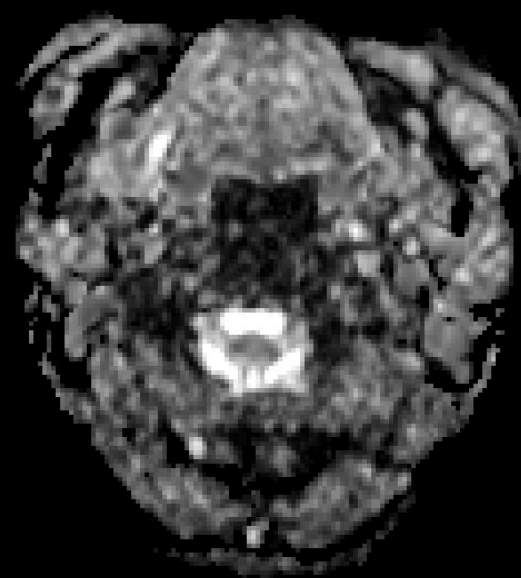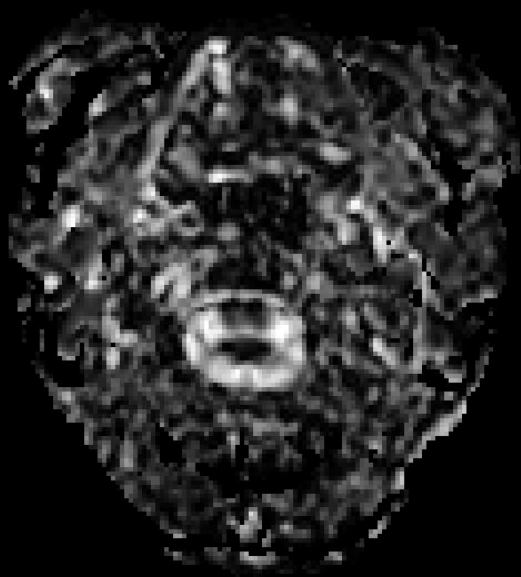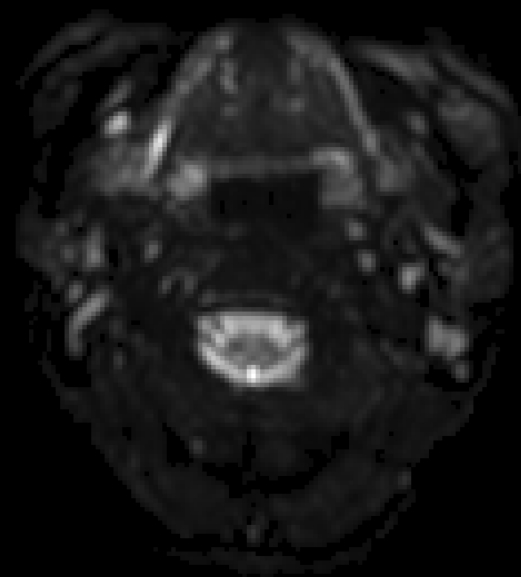



# Network instance 84

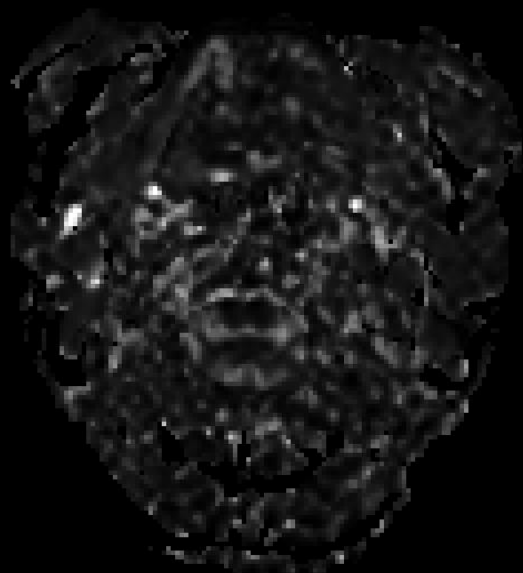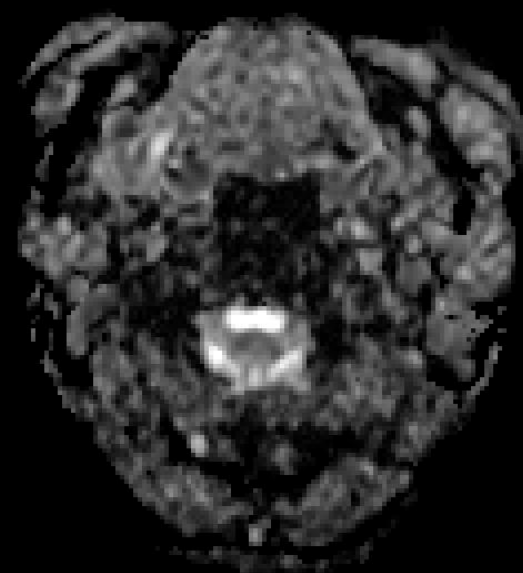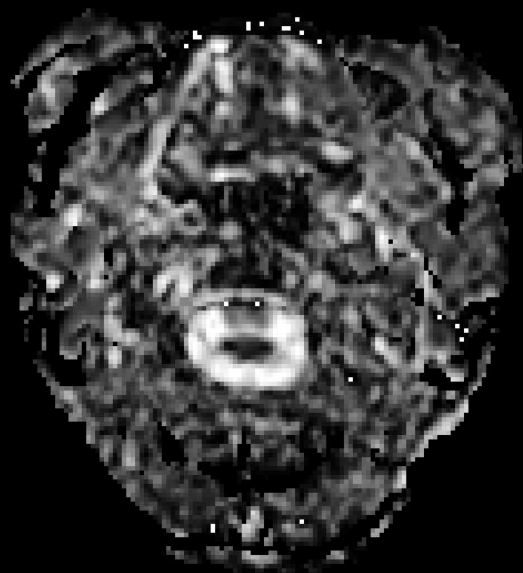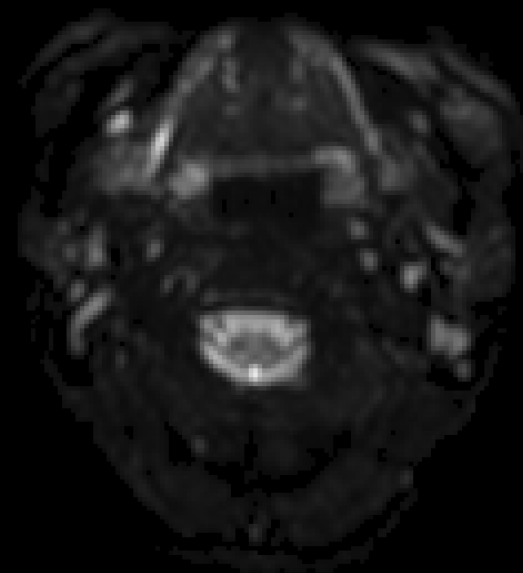

# Network instance 85

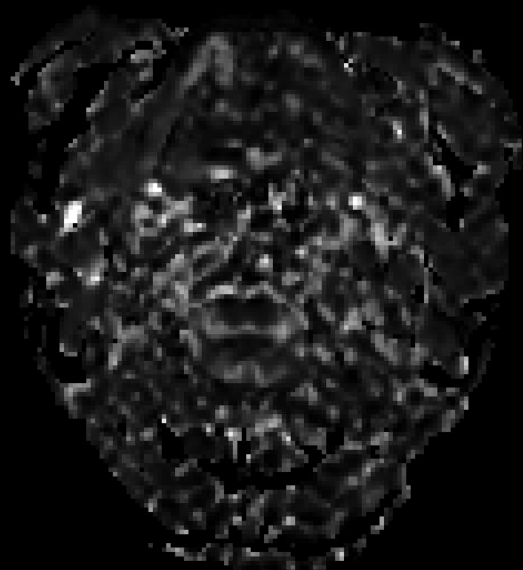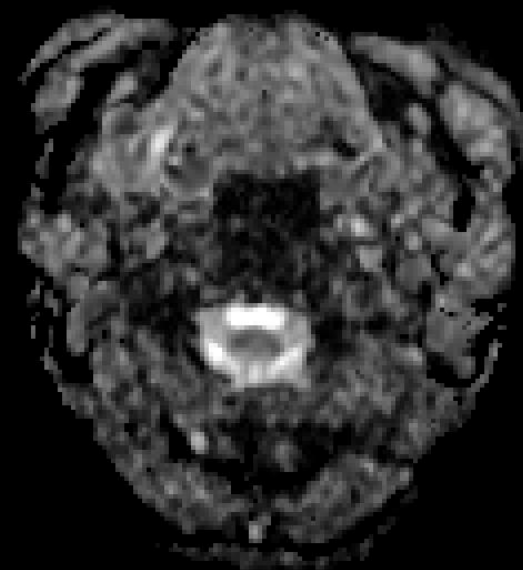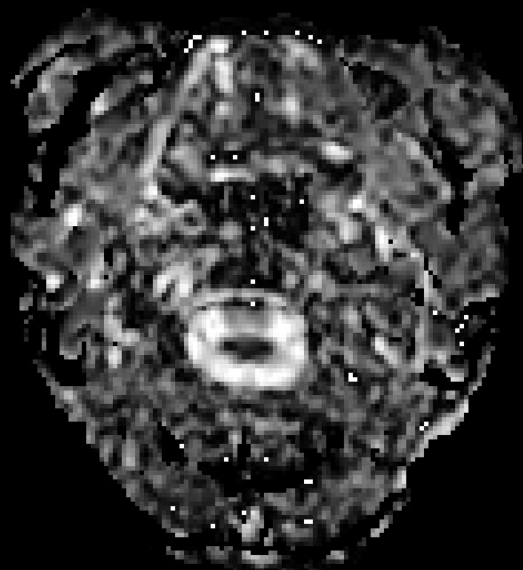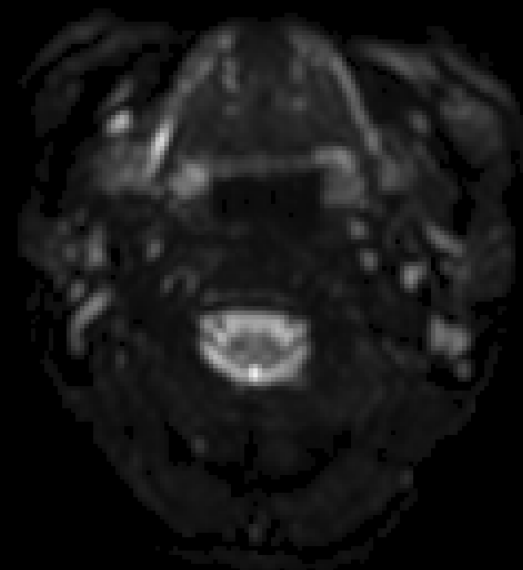

# Network instance 86

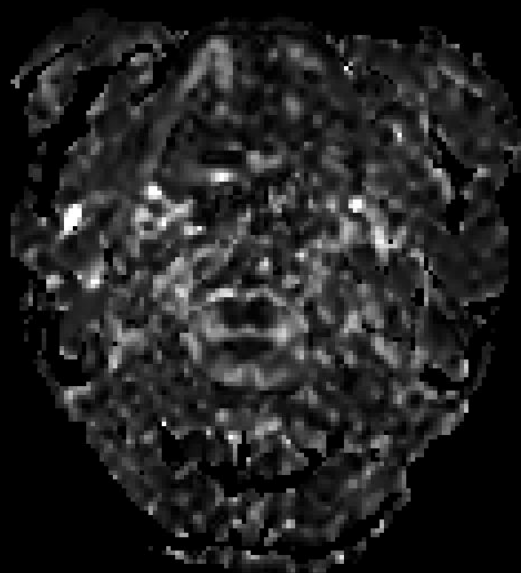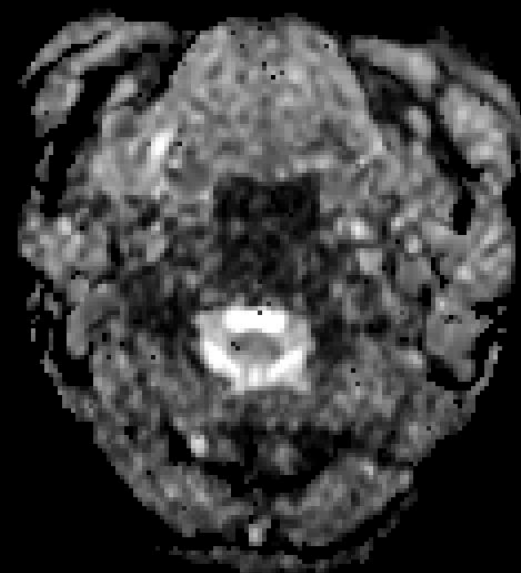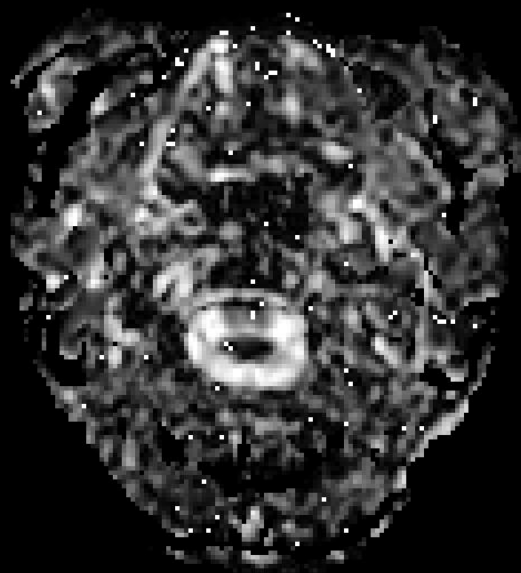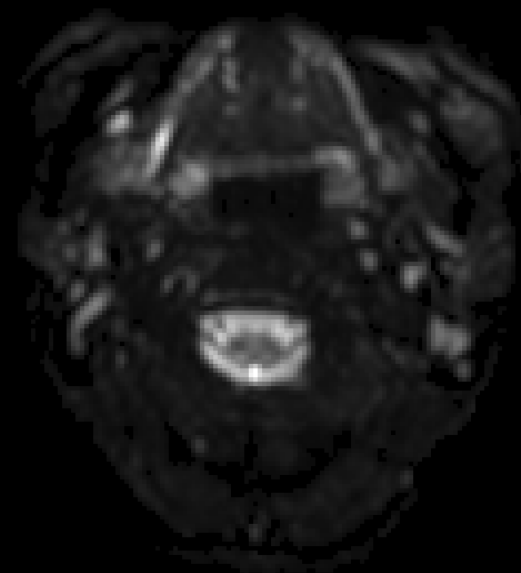

# Network instance 87

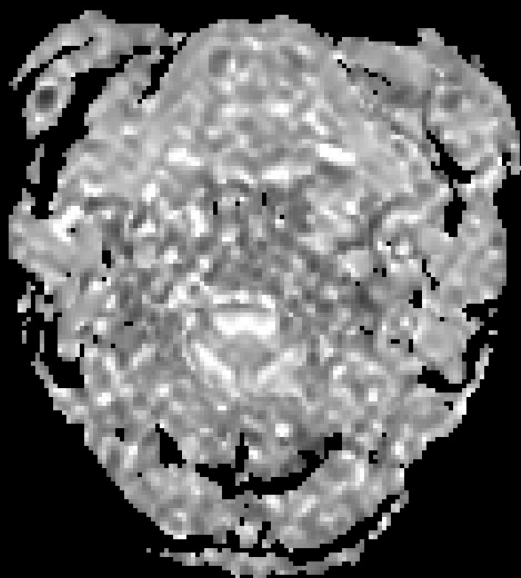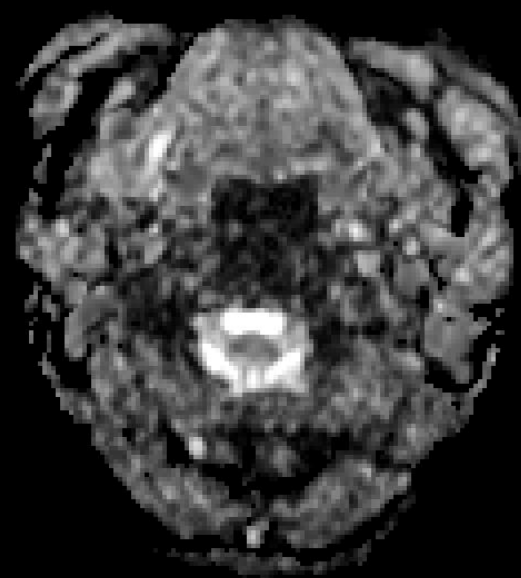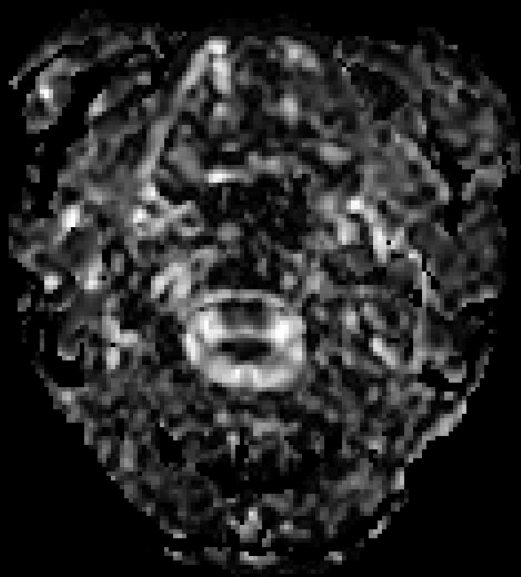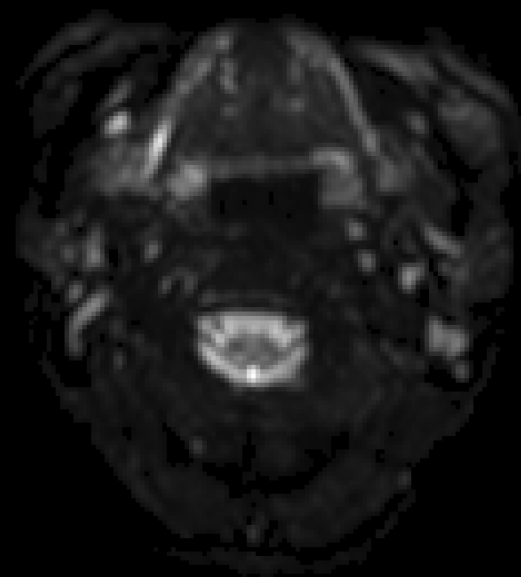

# Network instance 88

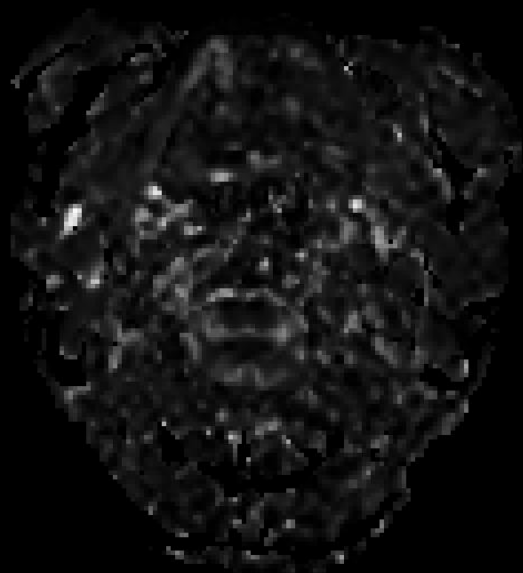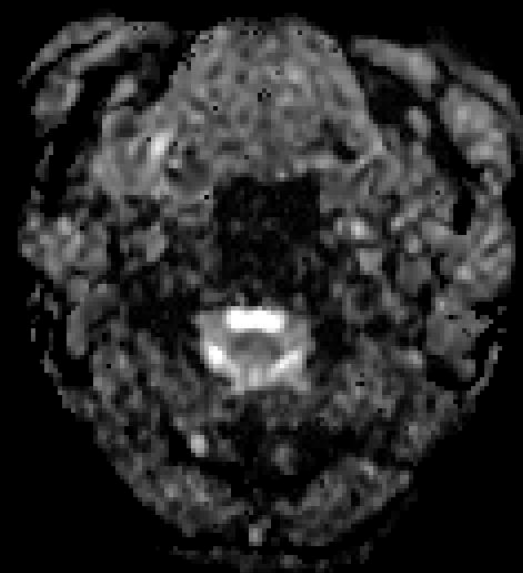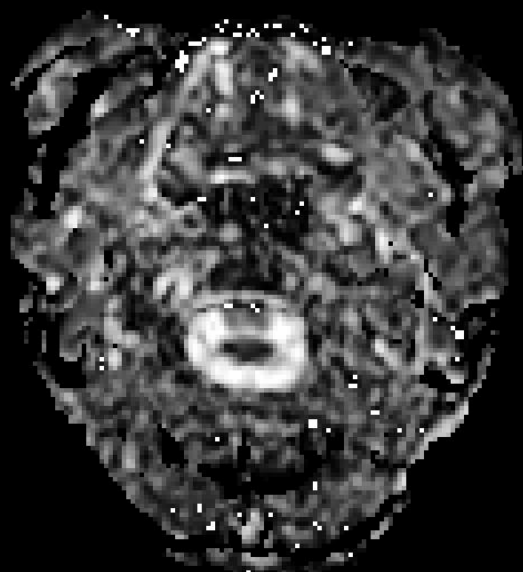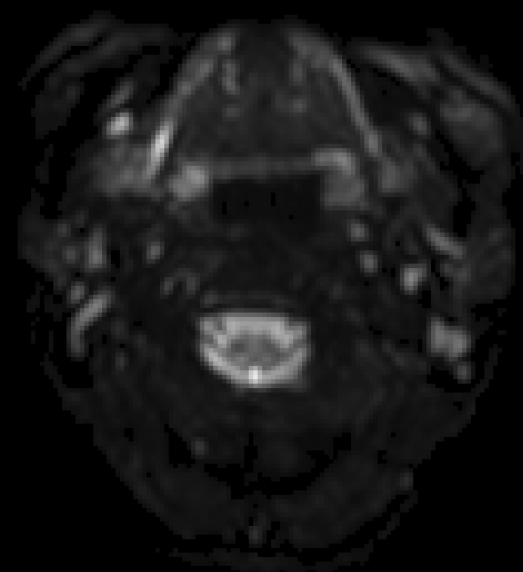

# Network instance 89

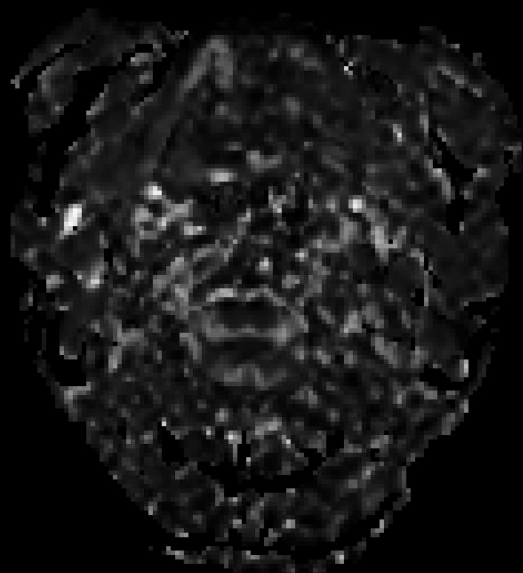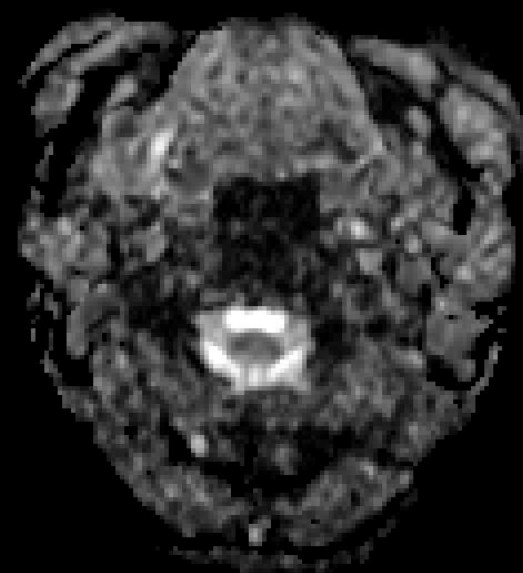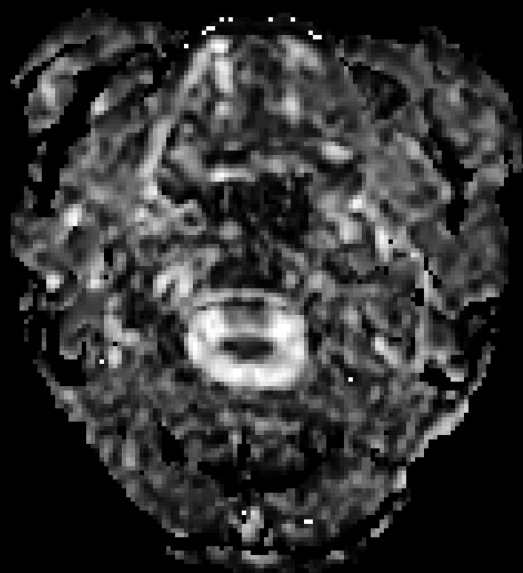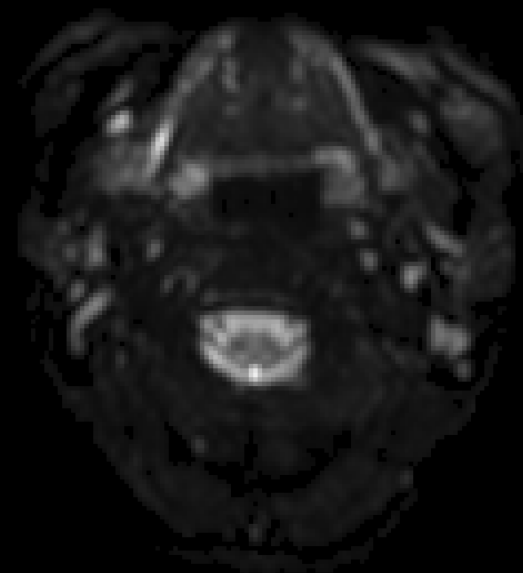

# Network instance 90

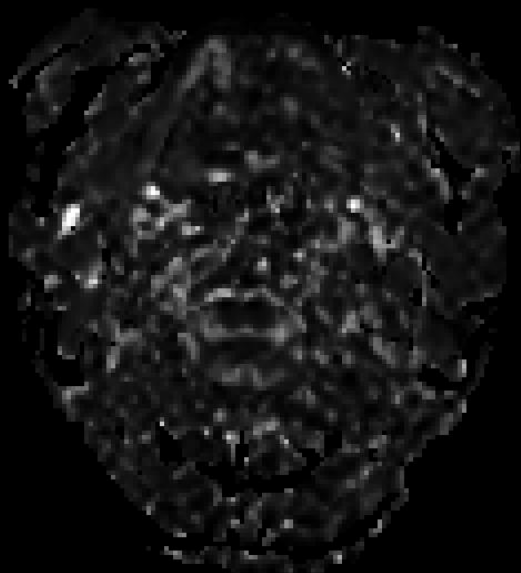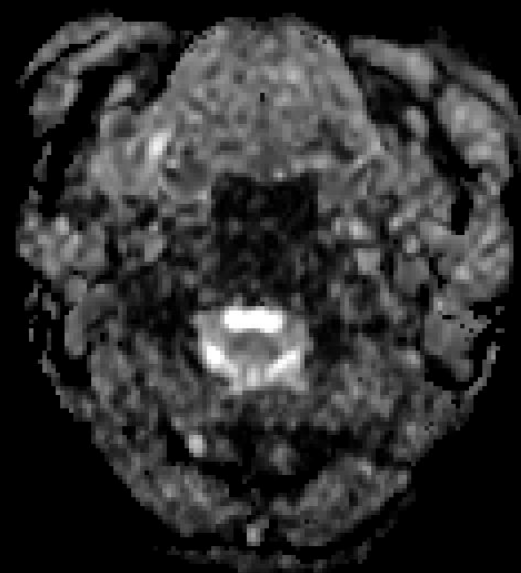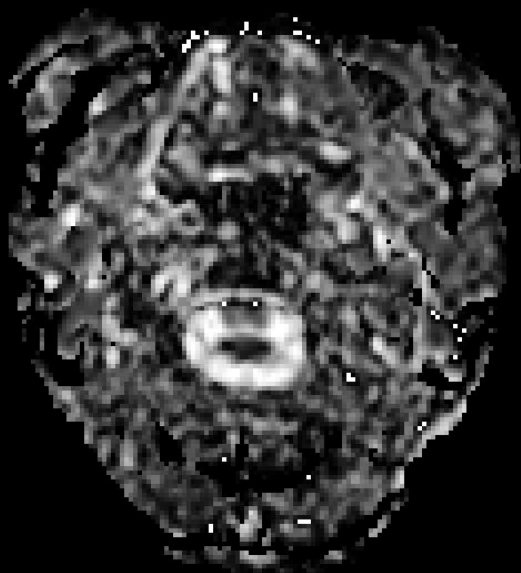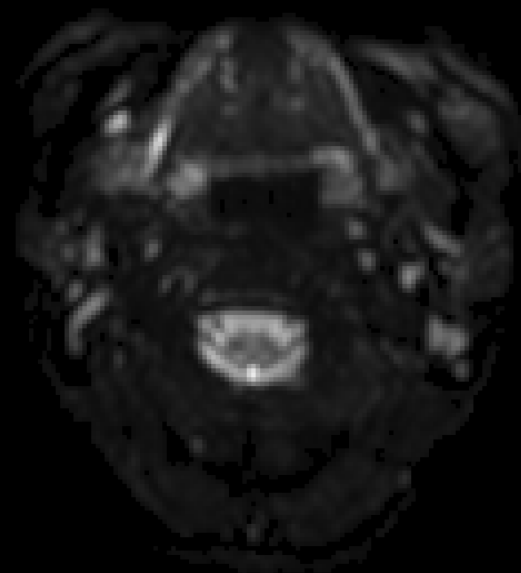

# Network instance 91

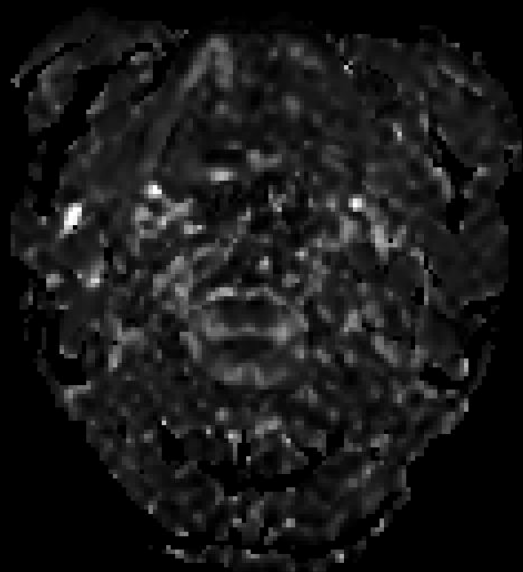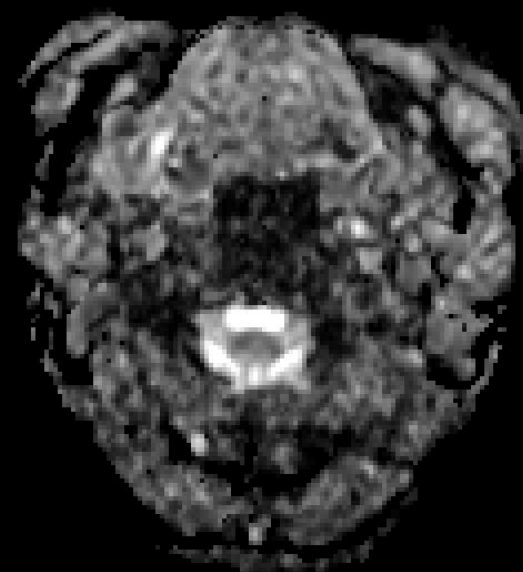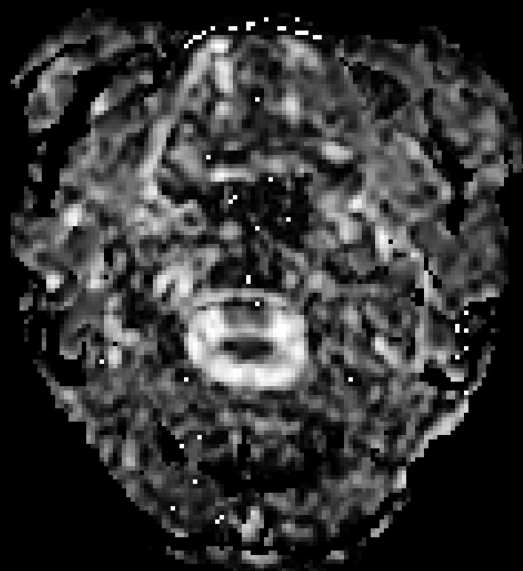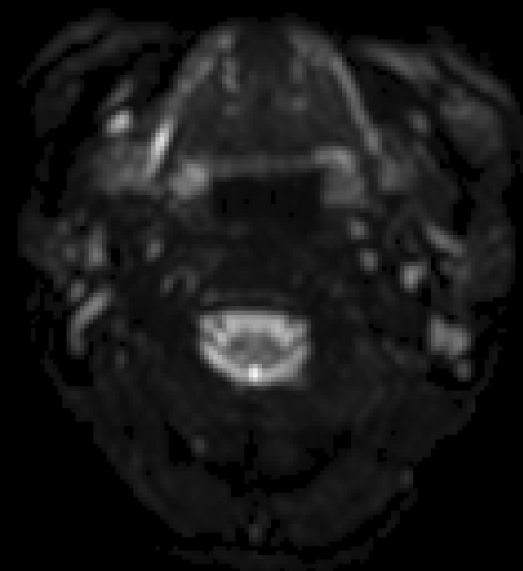



# Network instance 92

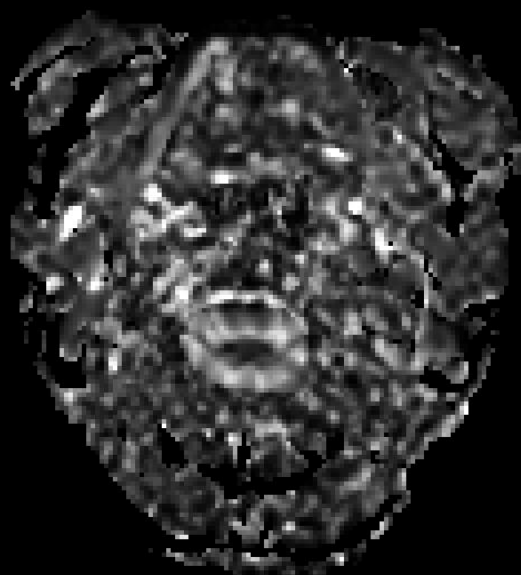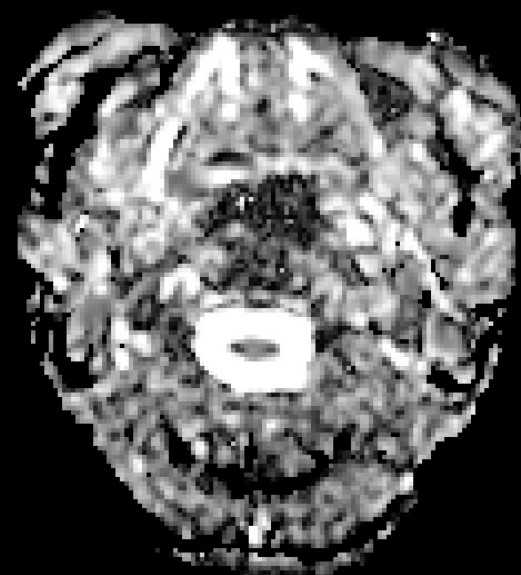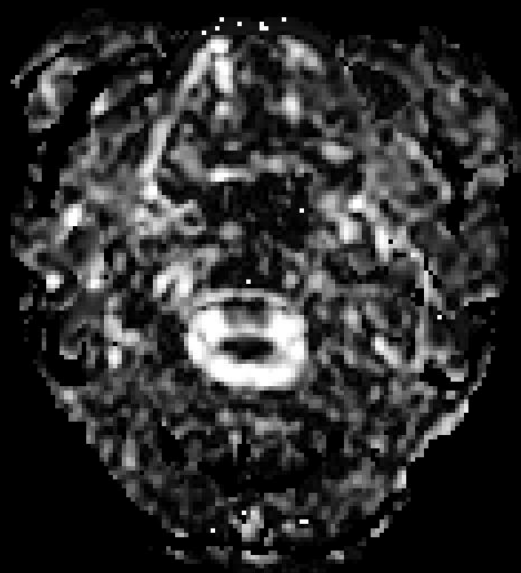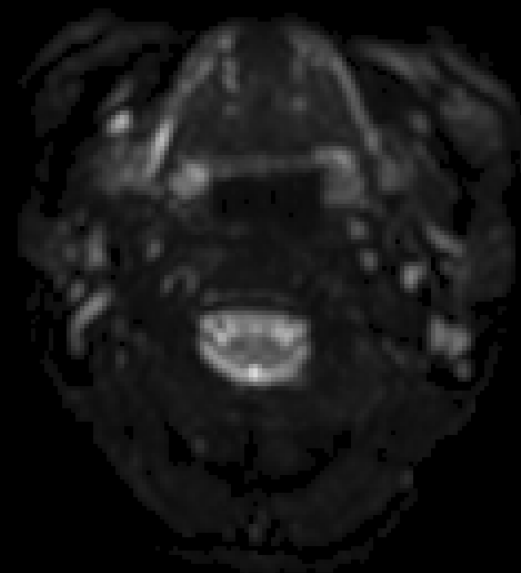

# Network instance 93

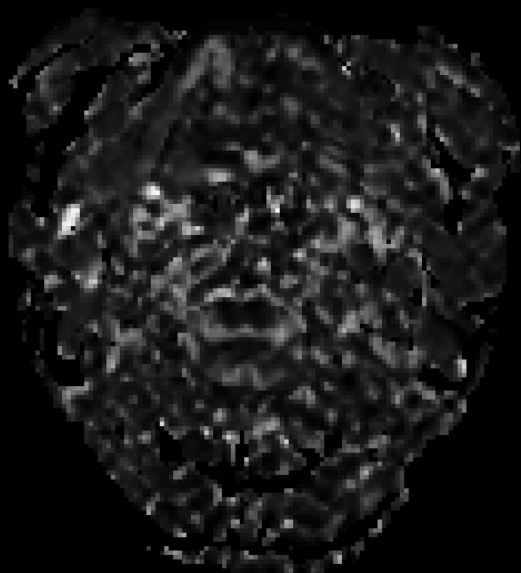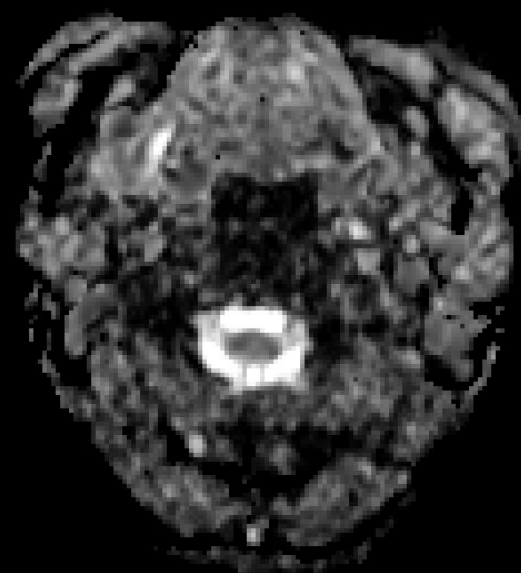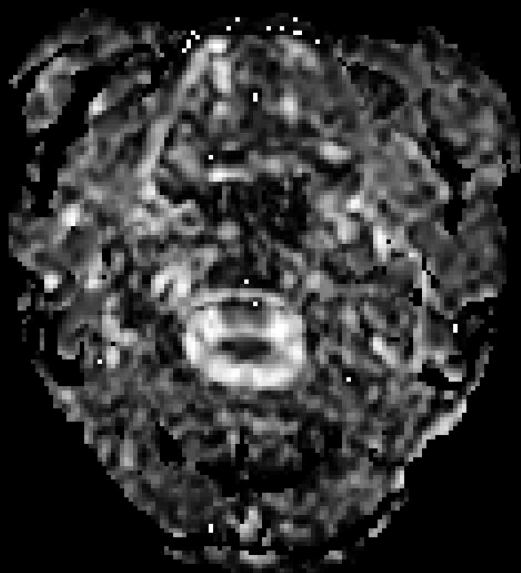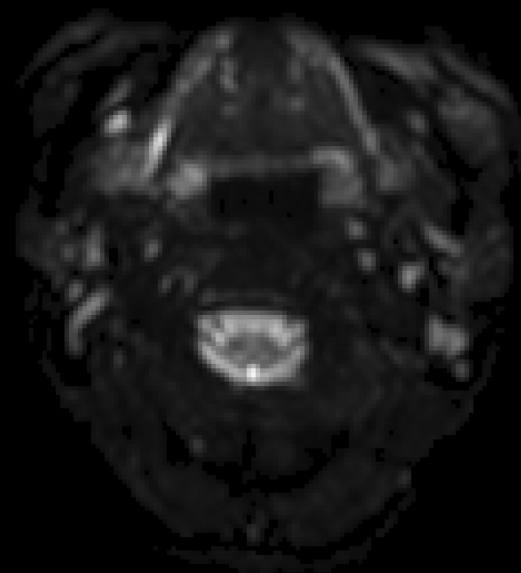

# Network instance 94

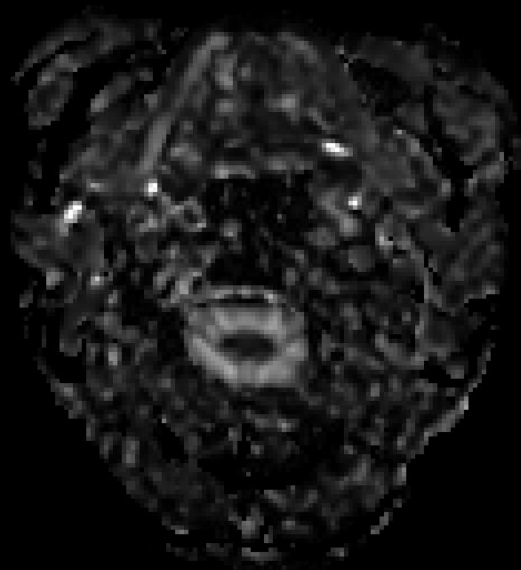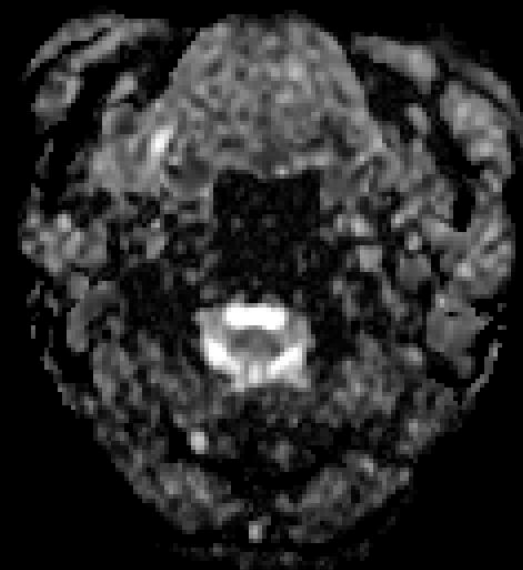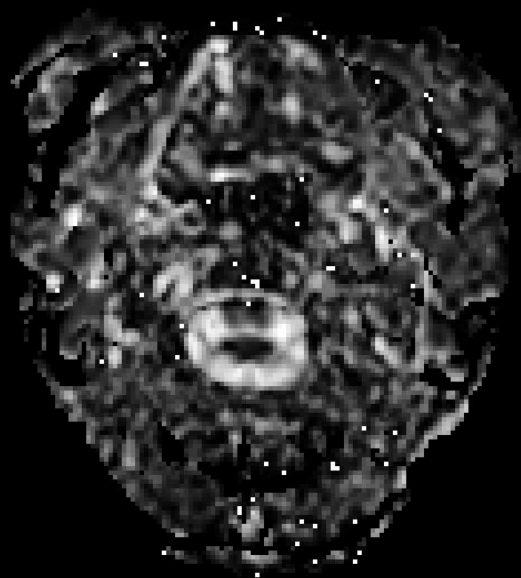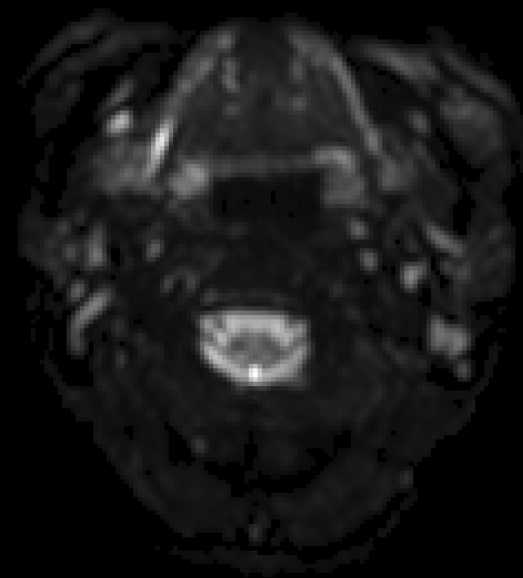

# Network instance 95

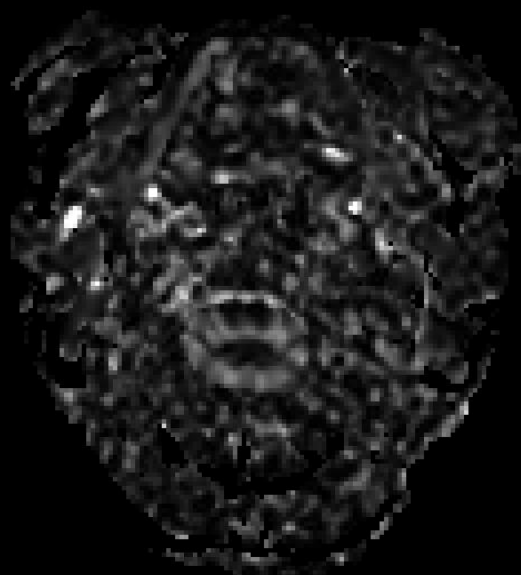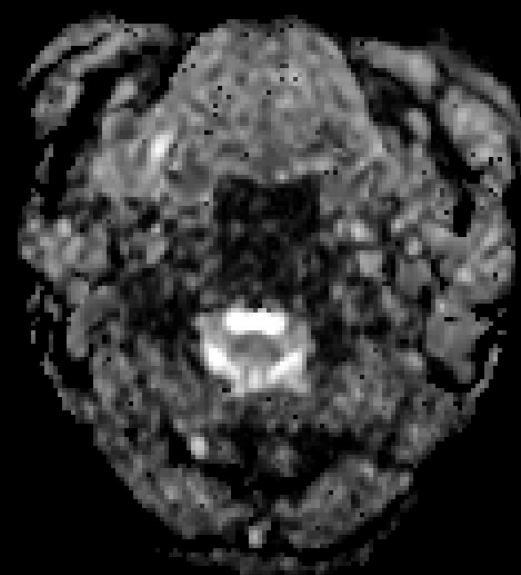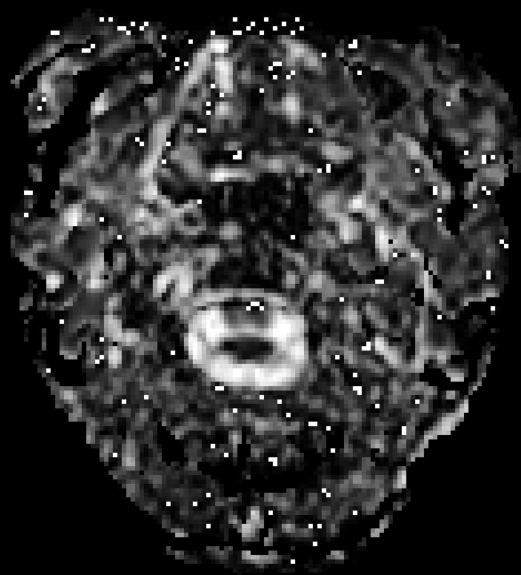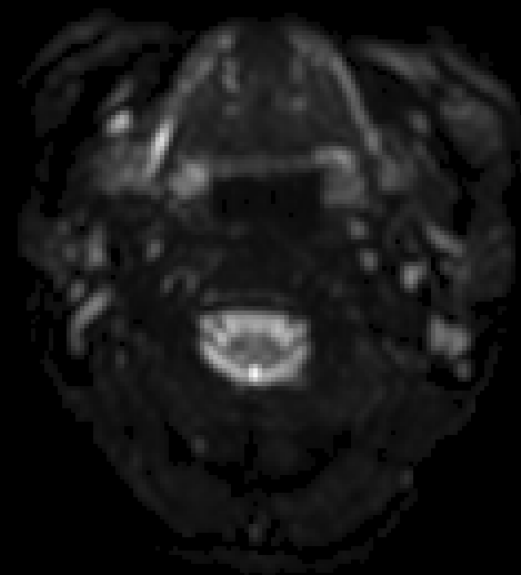

# Network instance 96

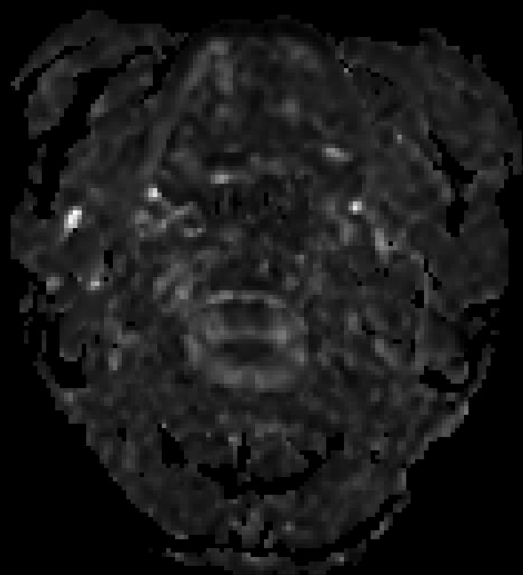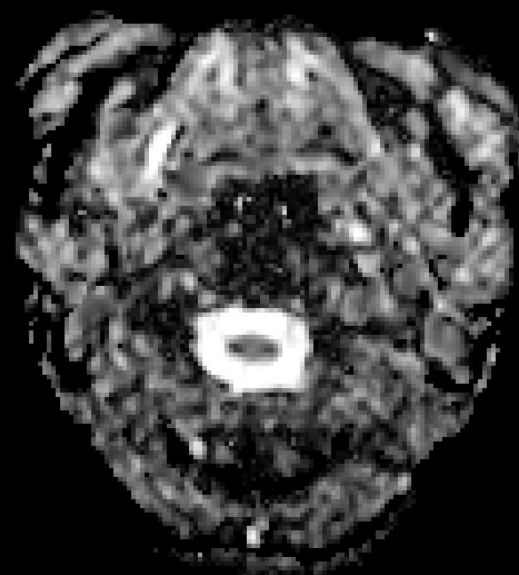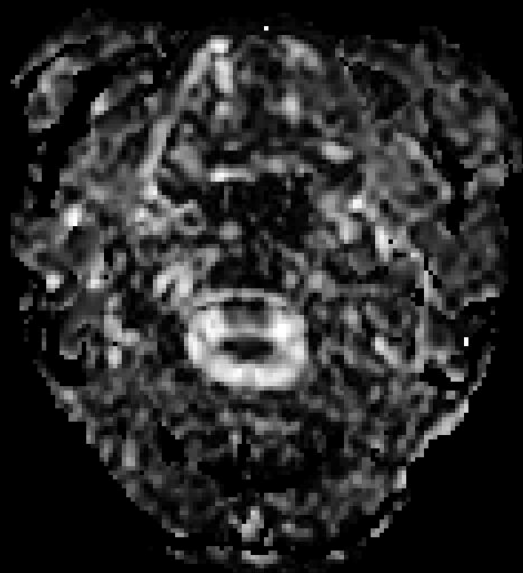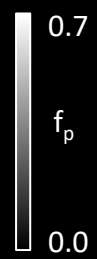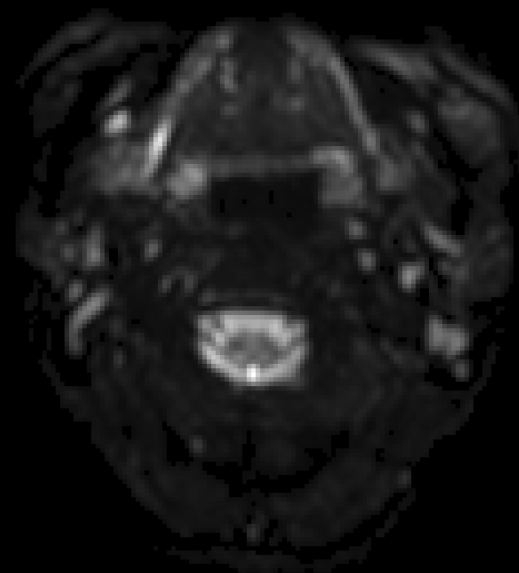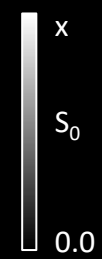

# Network instance 97

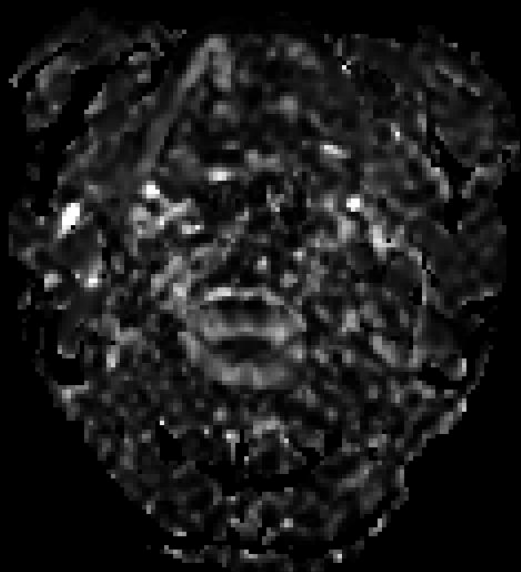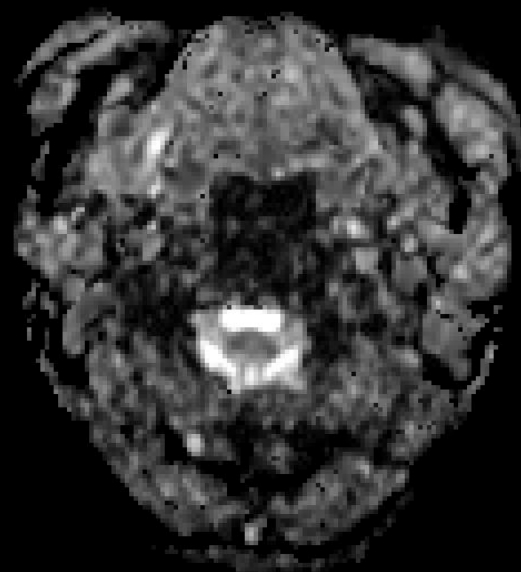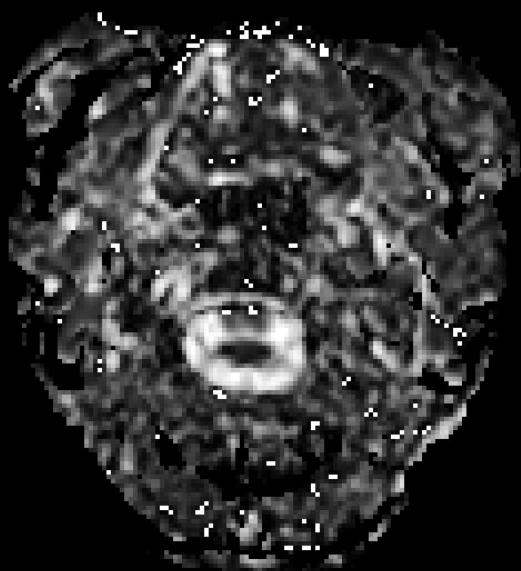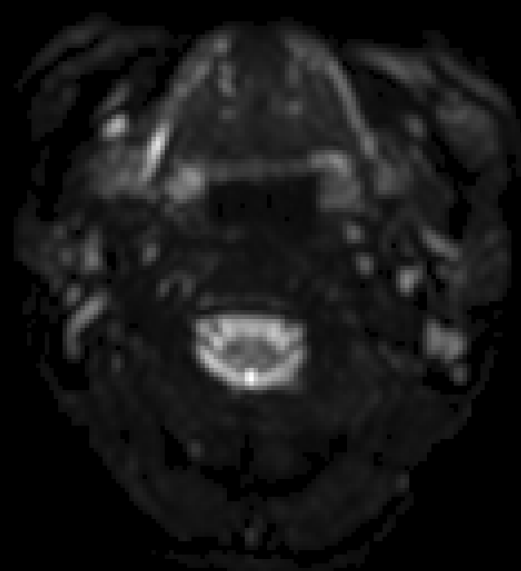

# Network instance 98

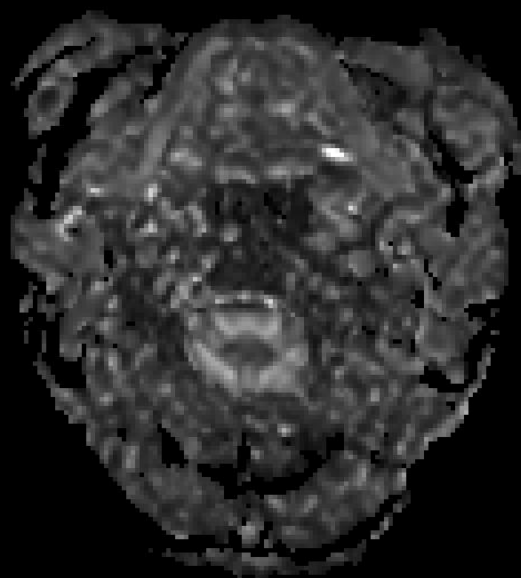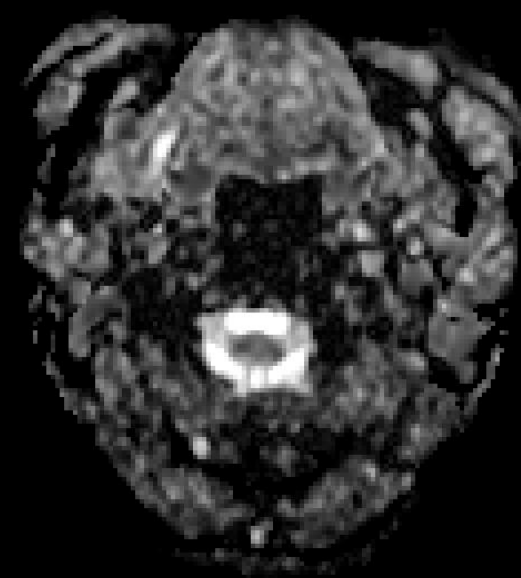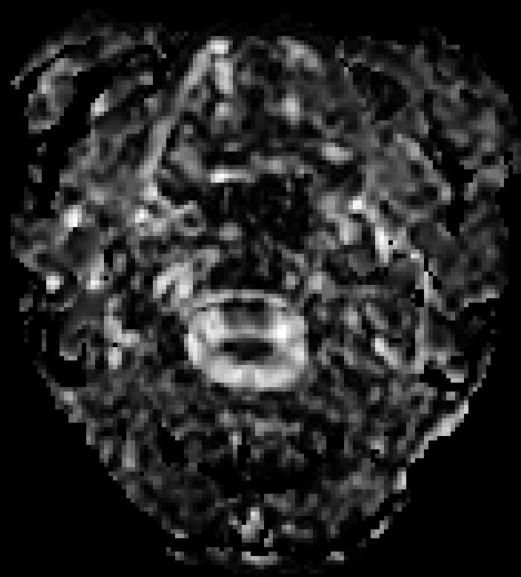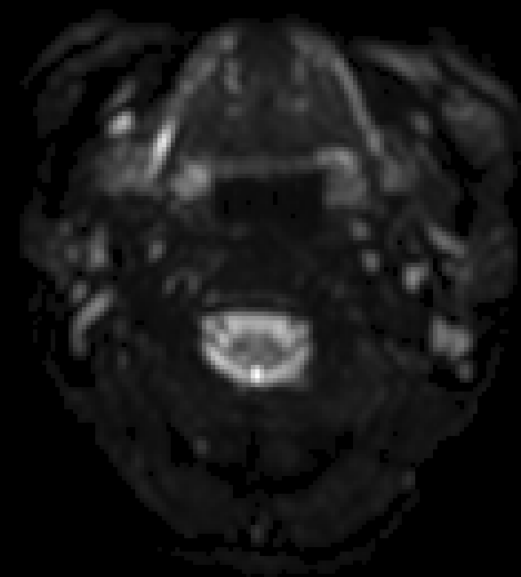

# Network instance 99

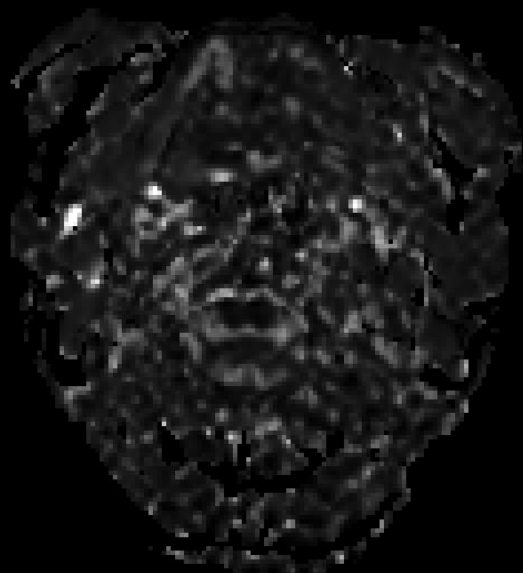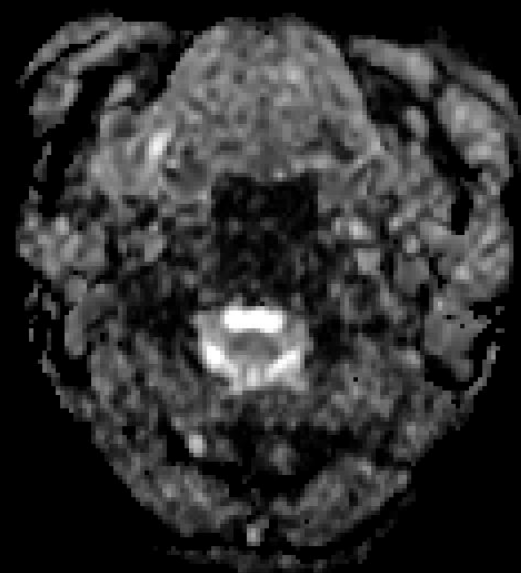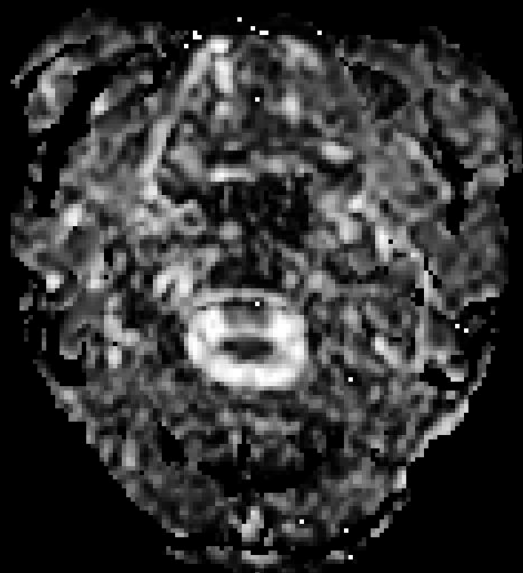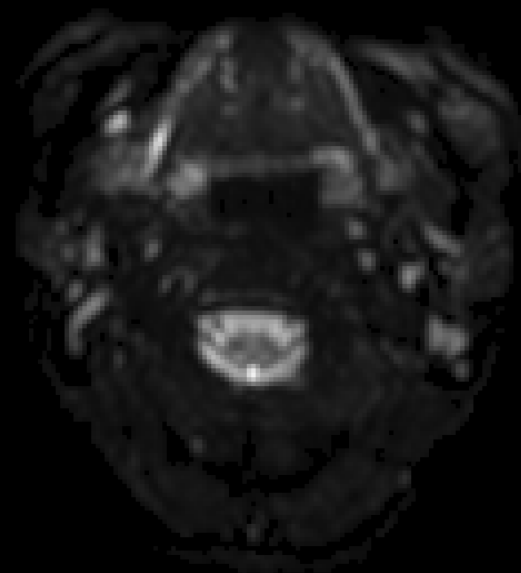



# Network instance 100

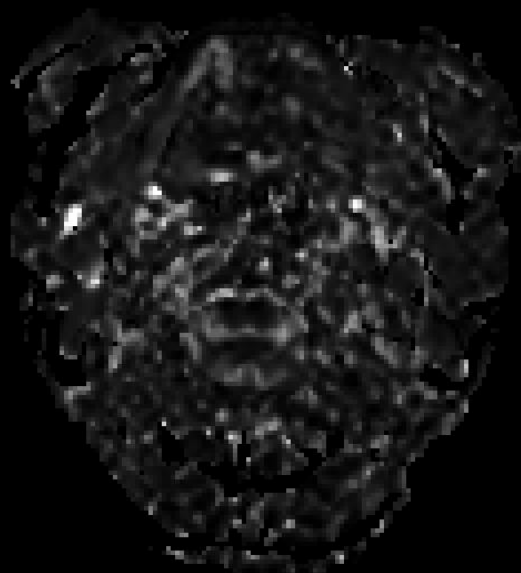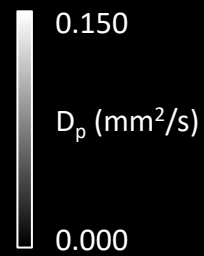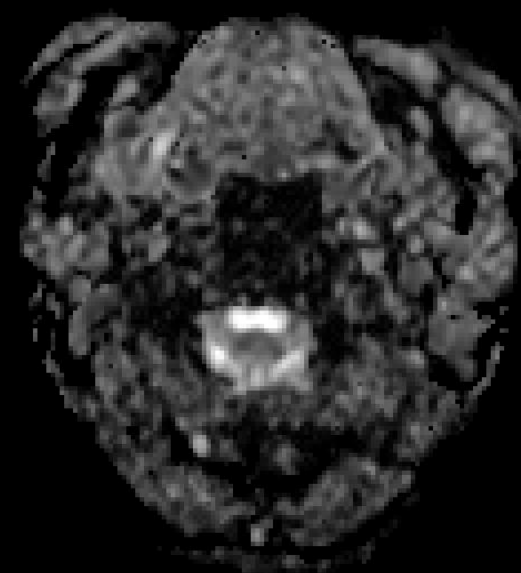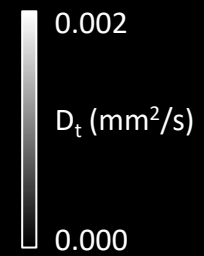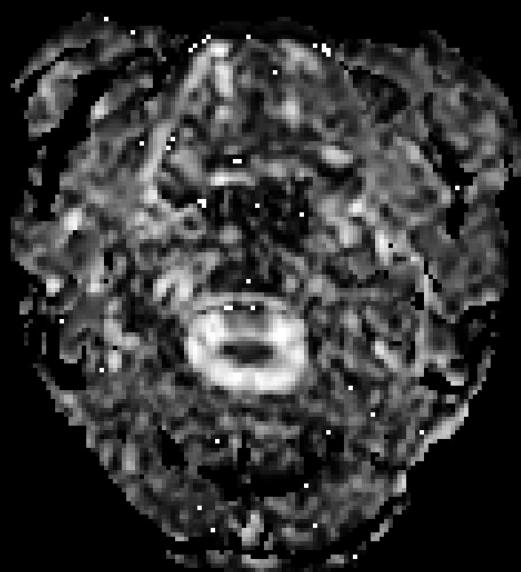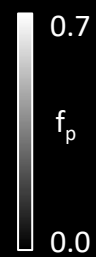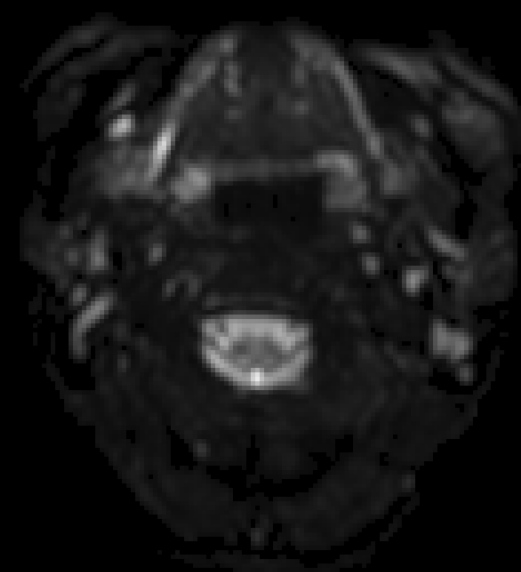

# Parametric IVIM maps

100 instances of IVIM-NET<sub>mod</sub>

(Set your PDF viewer to single page view for easy comparison.)

# Network instance 1

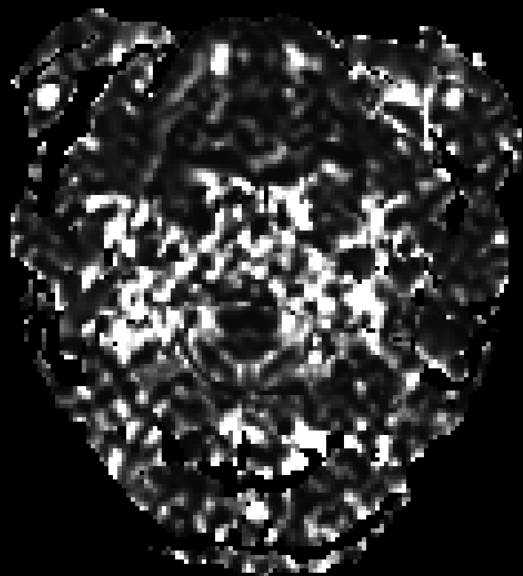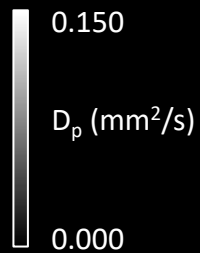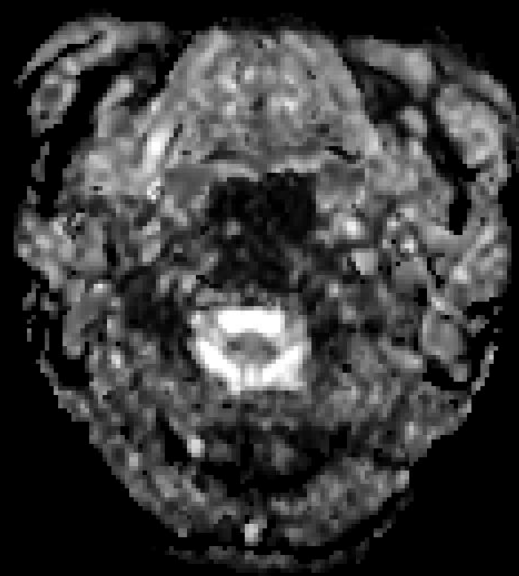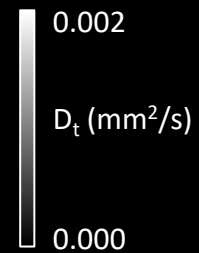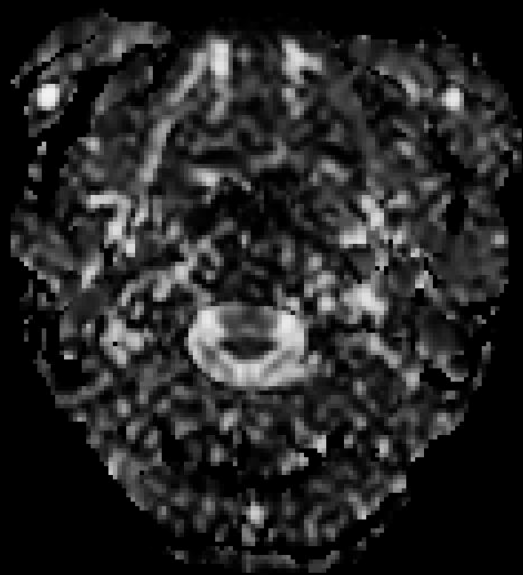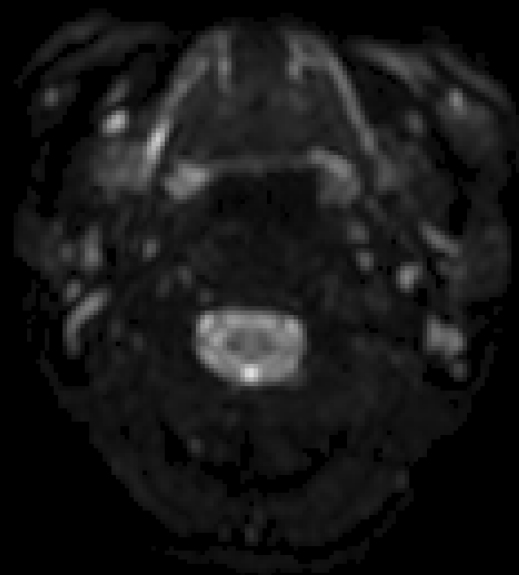

# Network instance 2

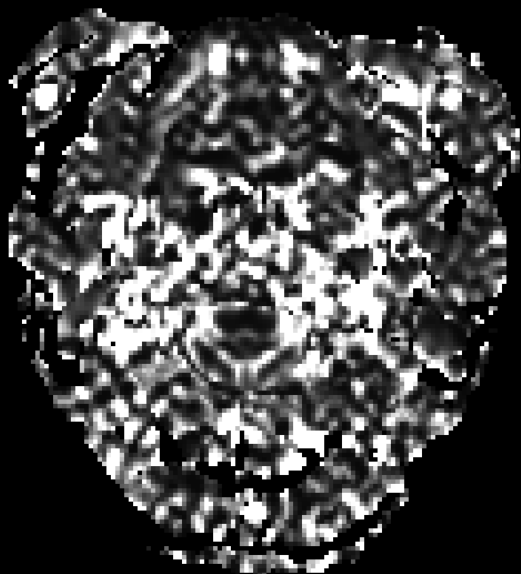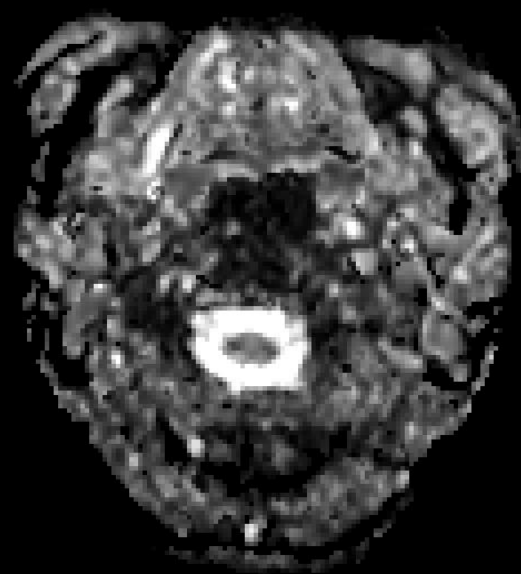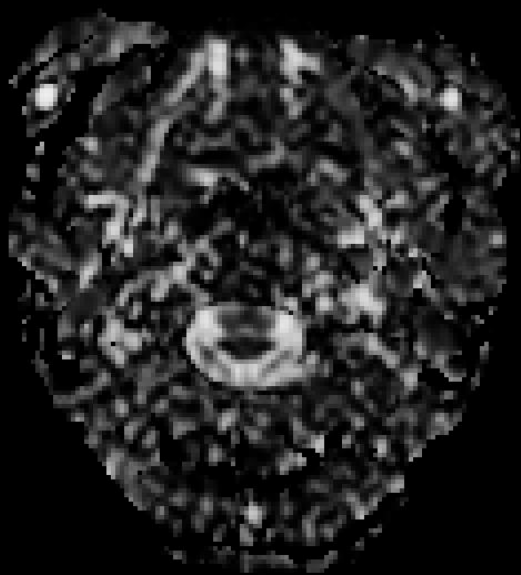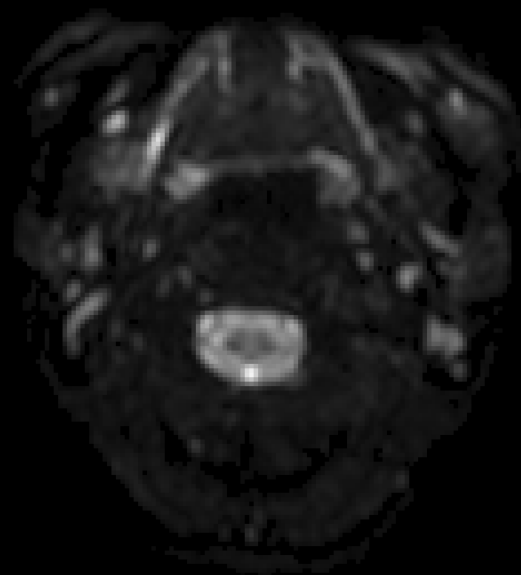

# Network instance 3

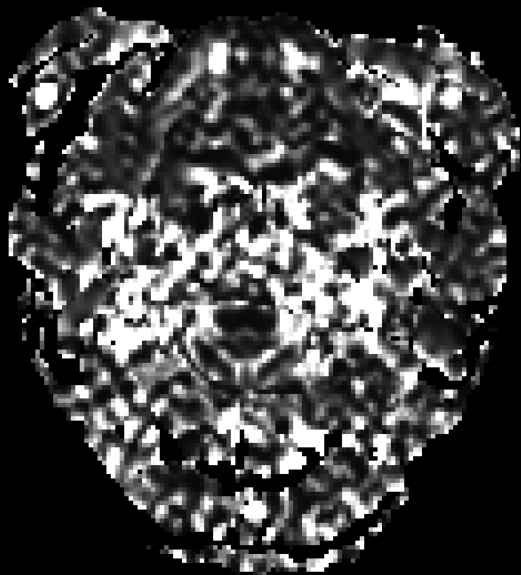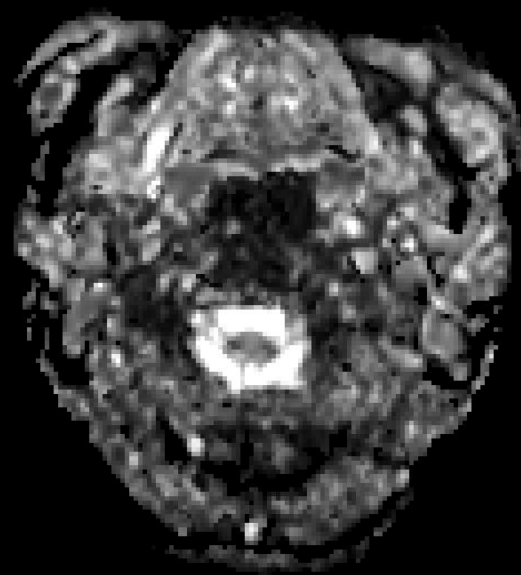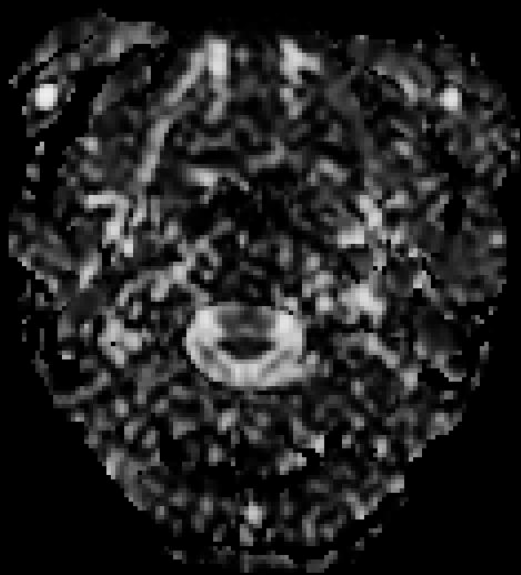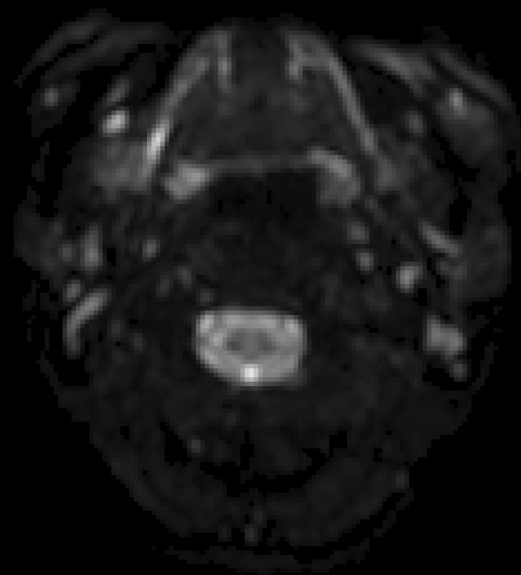

# Network instance 4

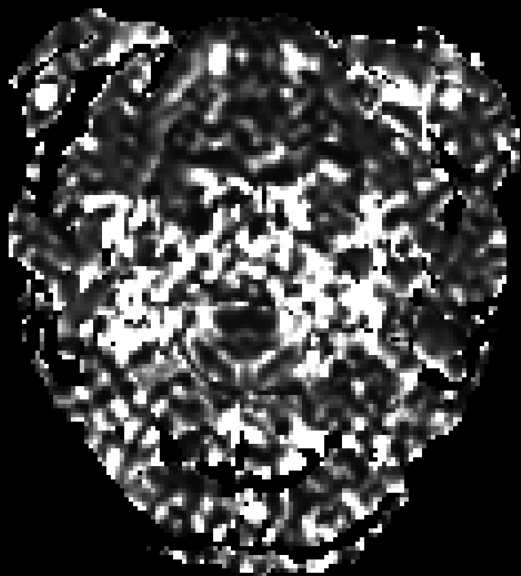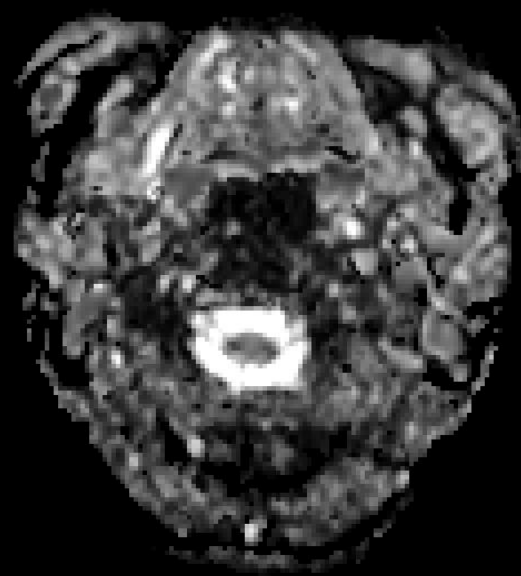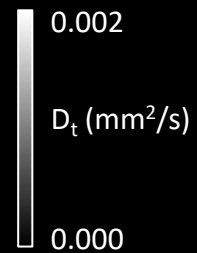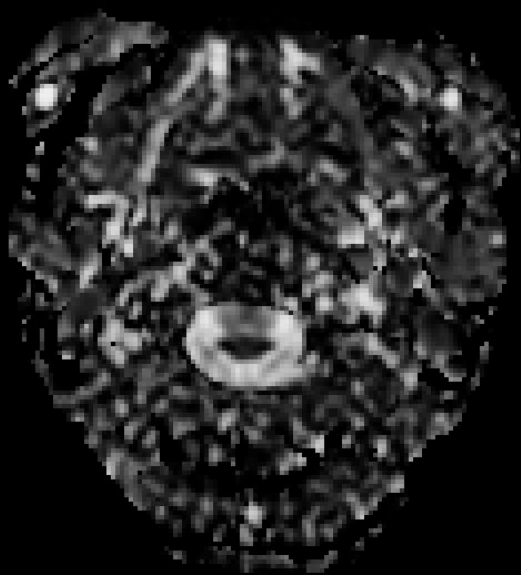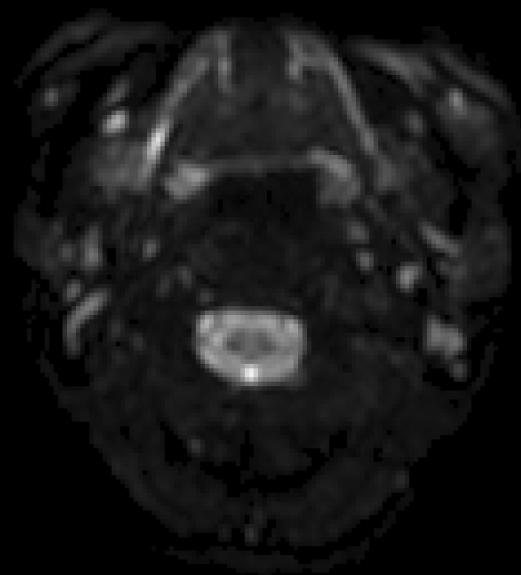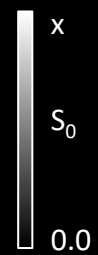

# Network instance 5

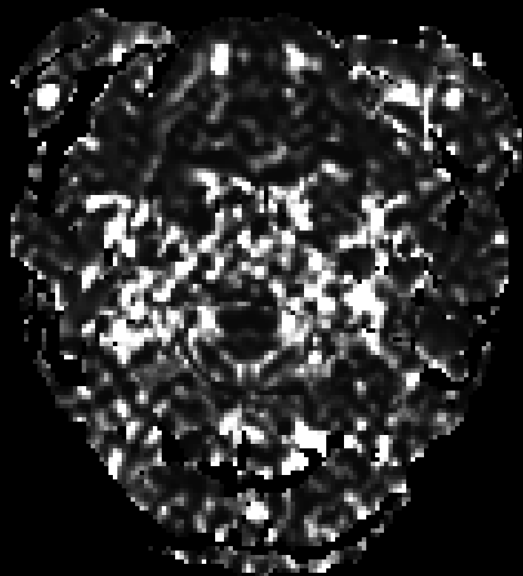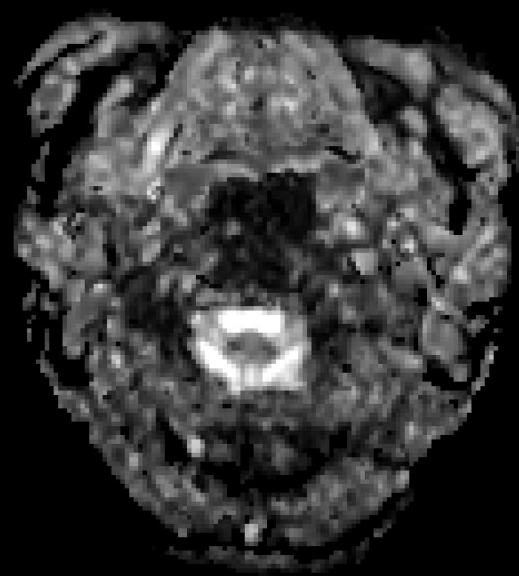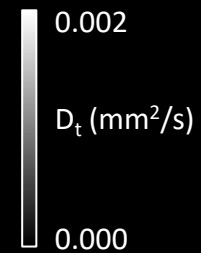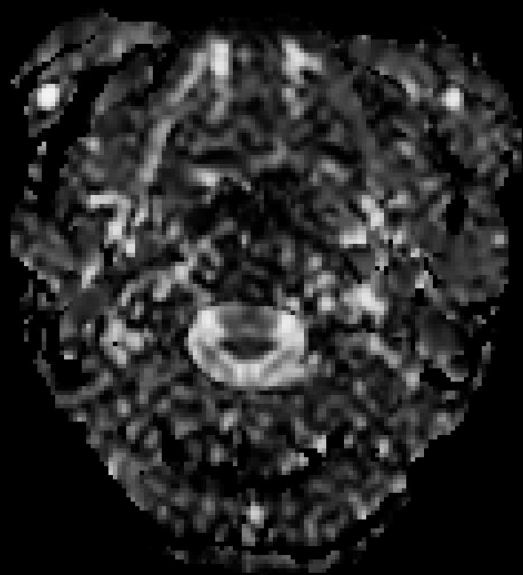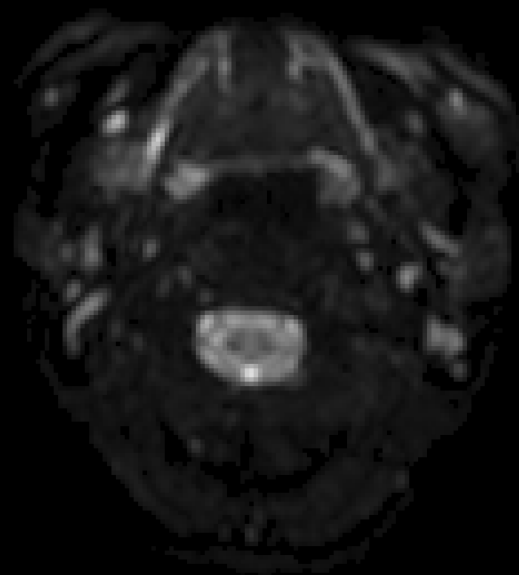

# Network instance 6

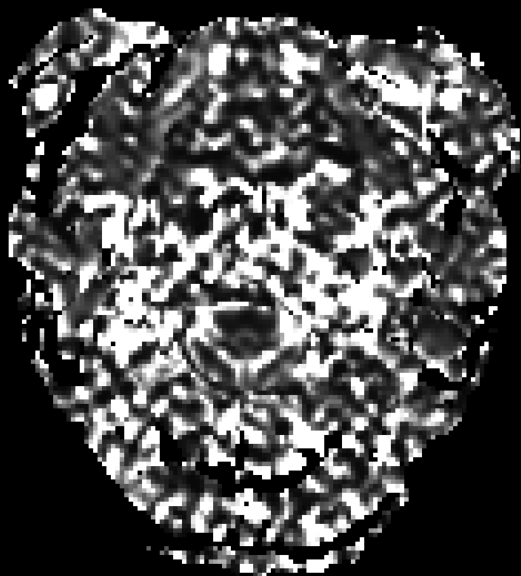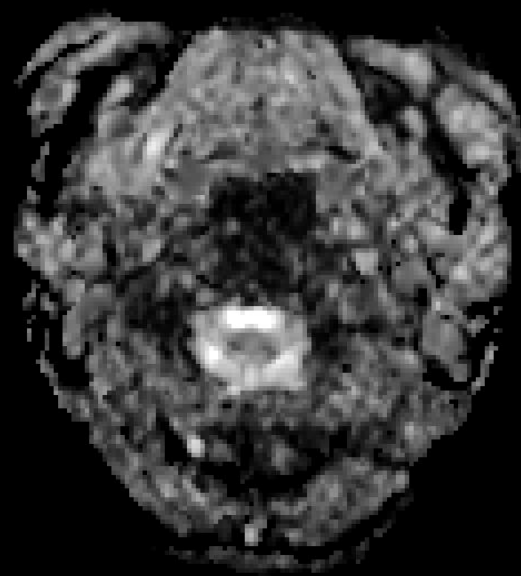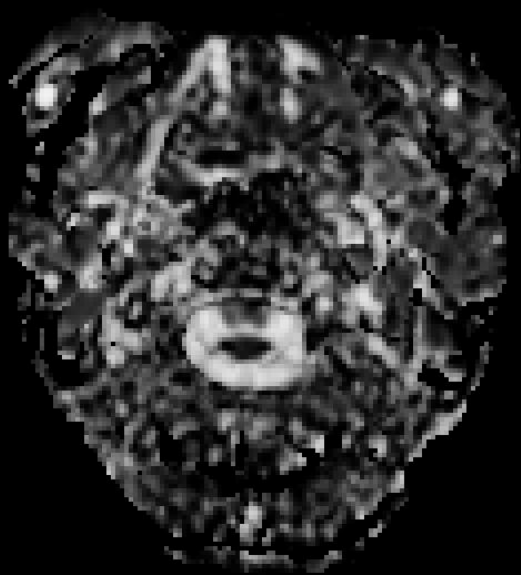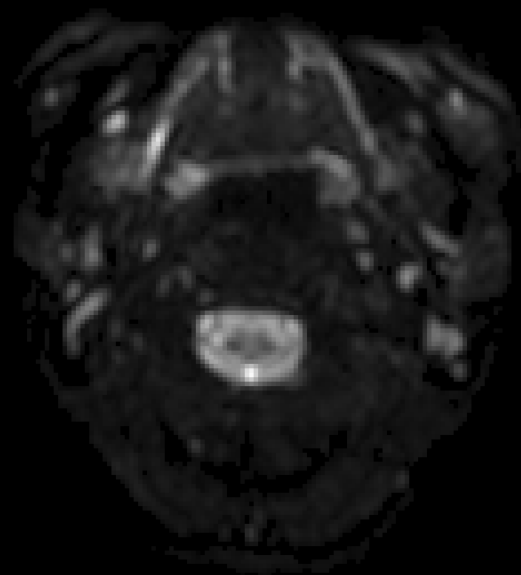



# Network instance 7

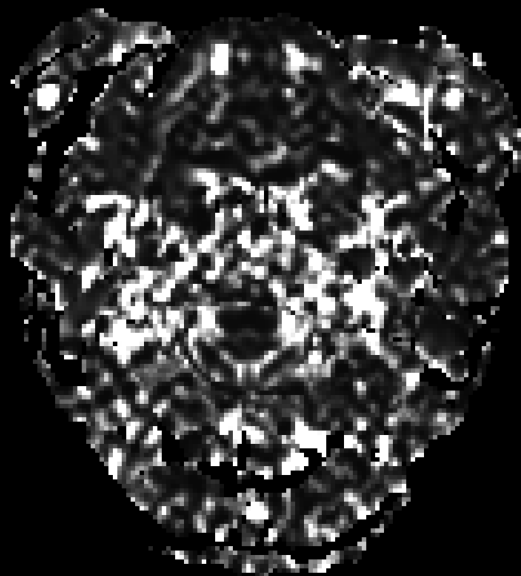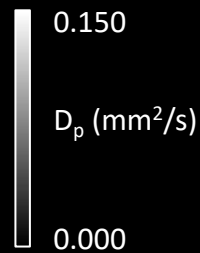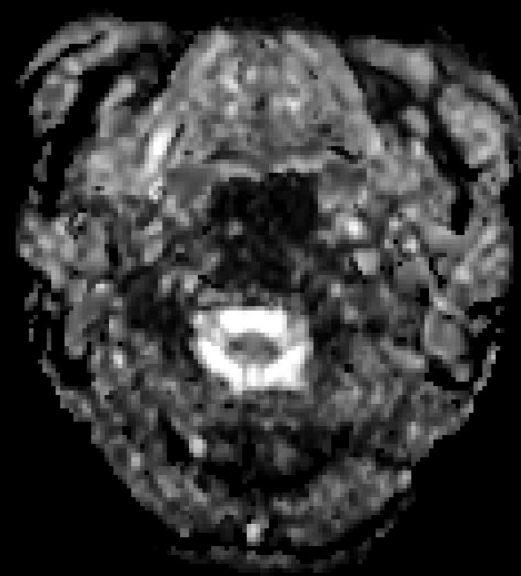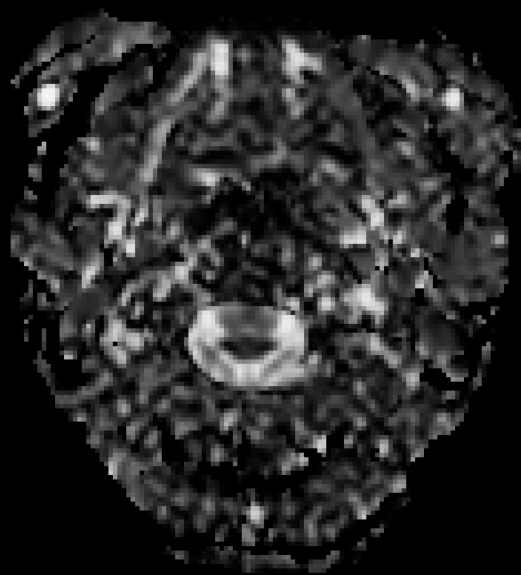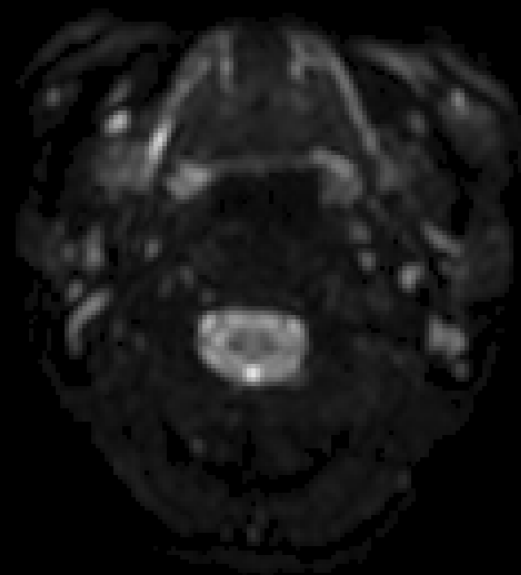

# Network instance 8

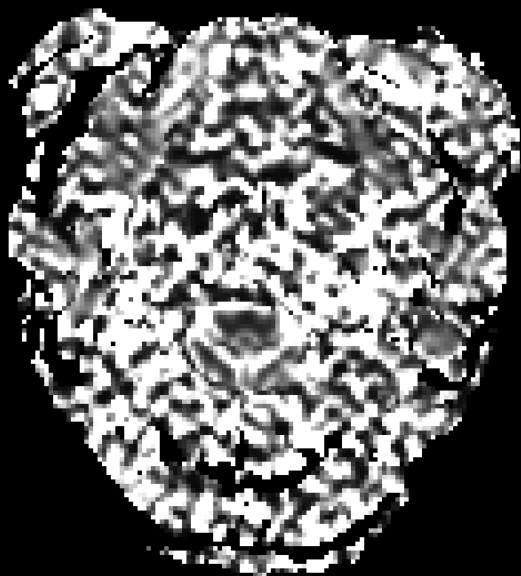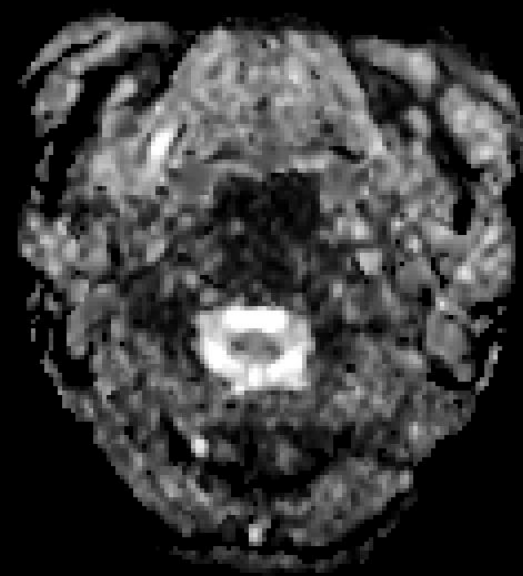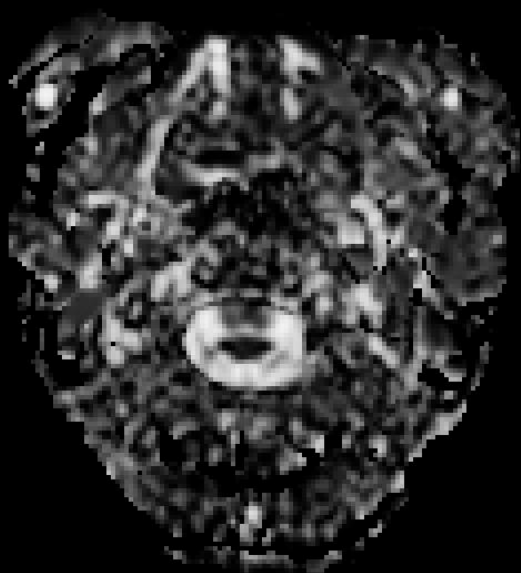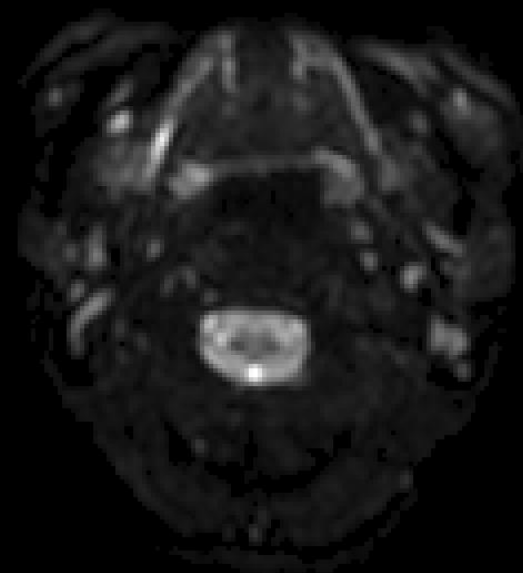

# Network instance 9

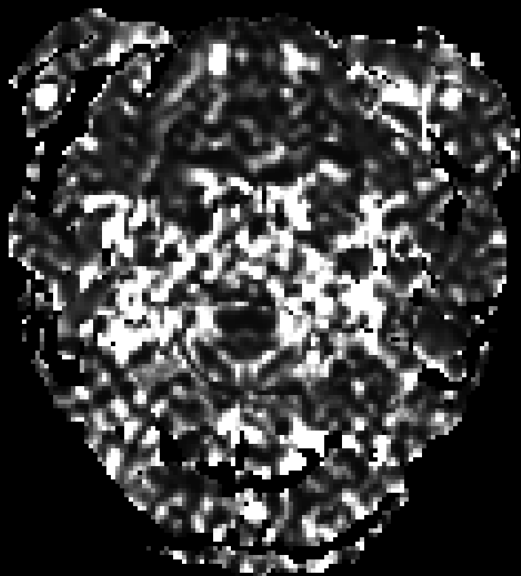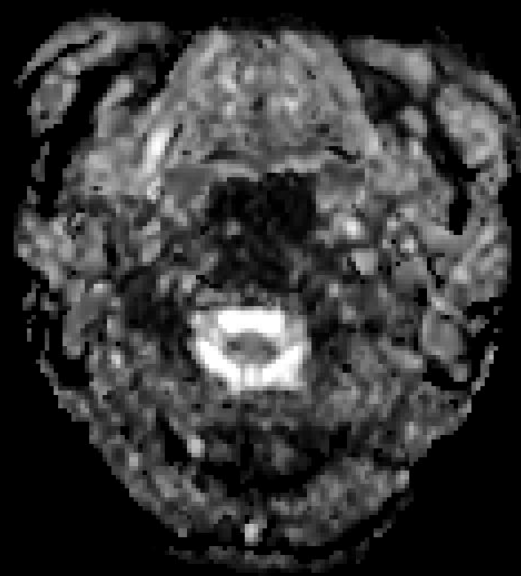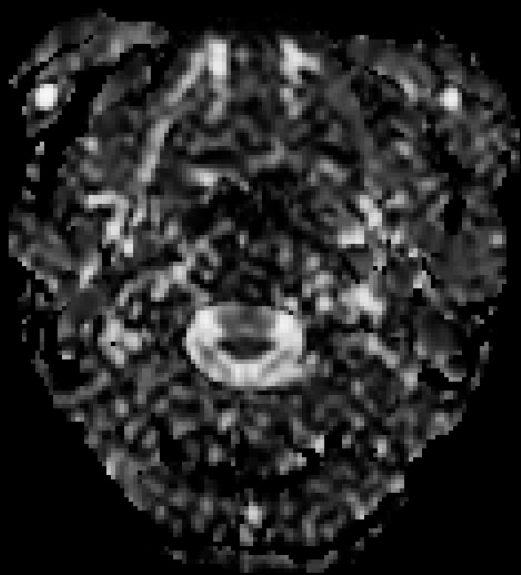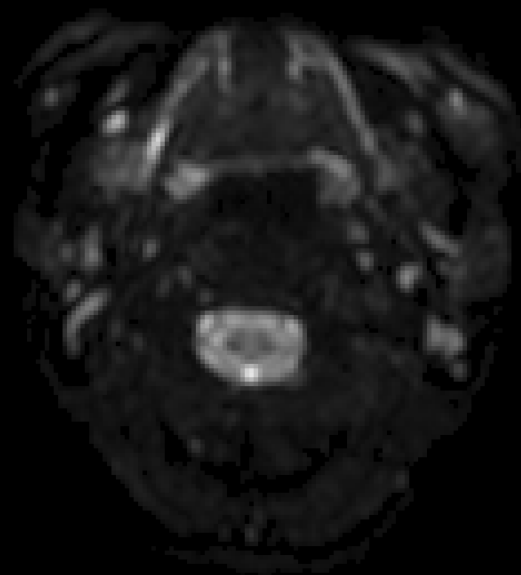

# Network instance 10

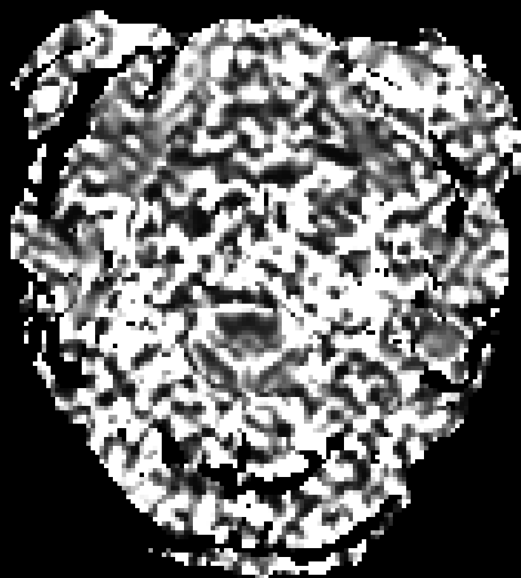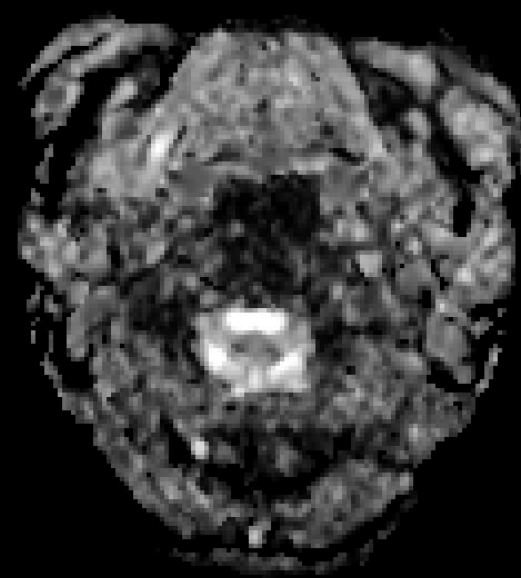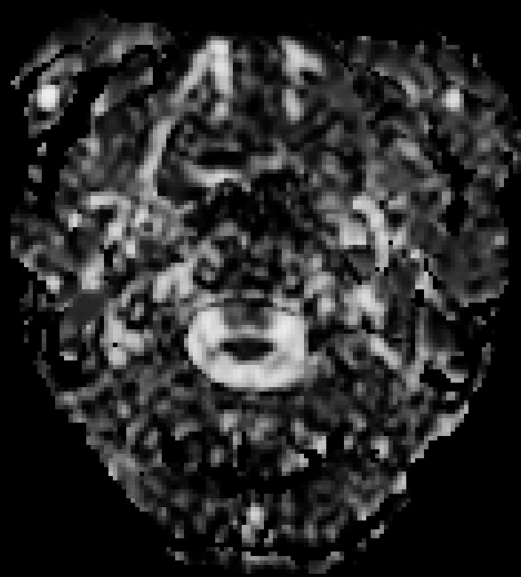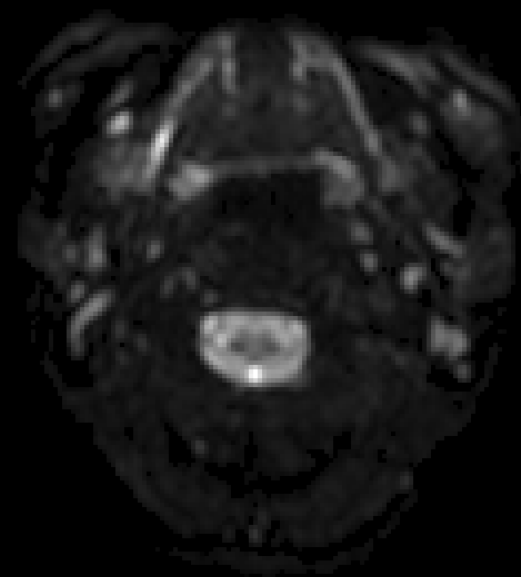

# Network instance 11

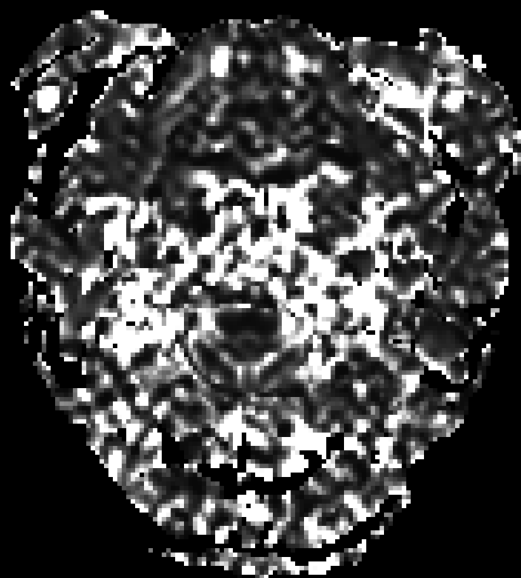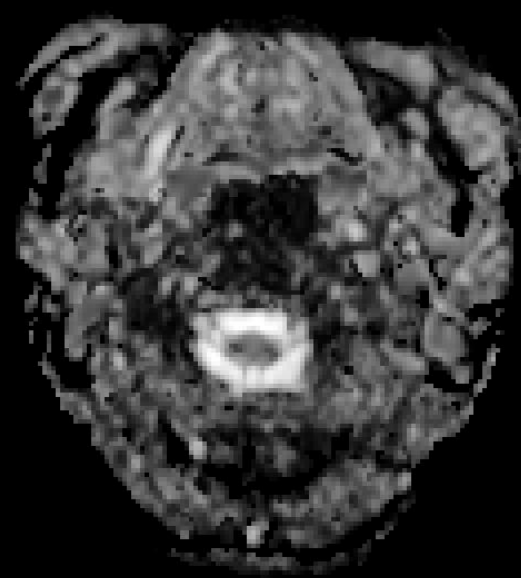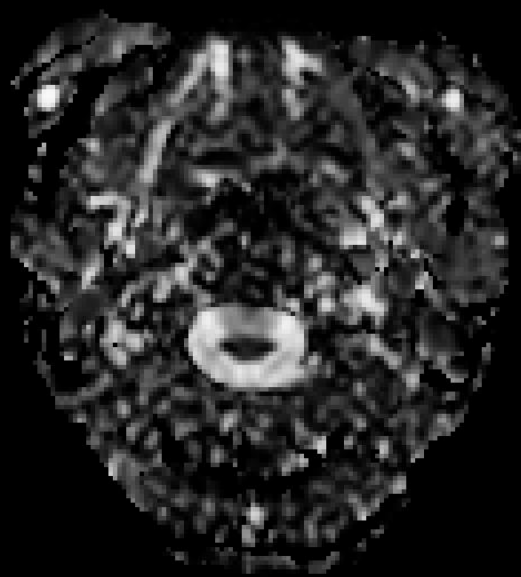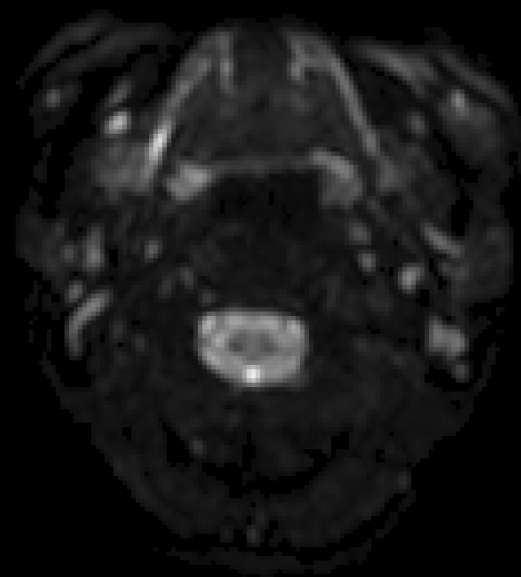

# Network instance 12

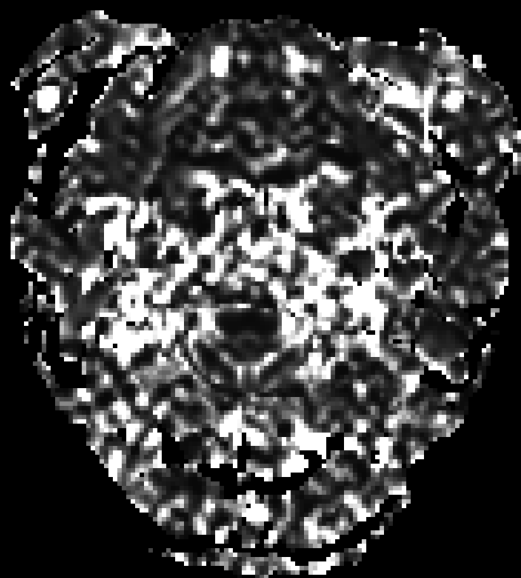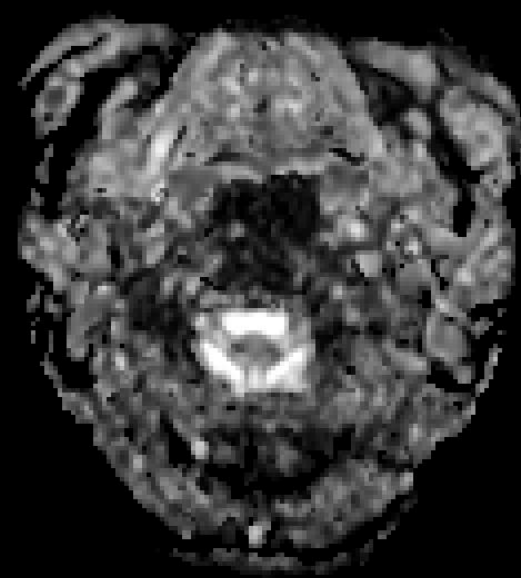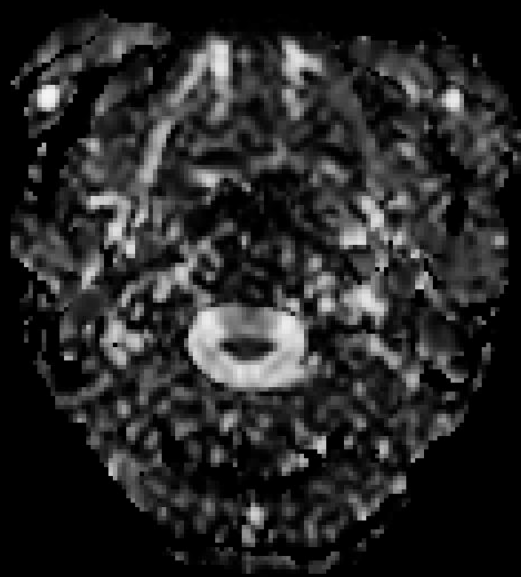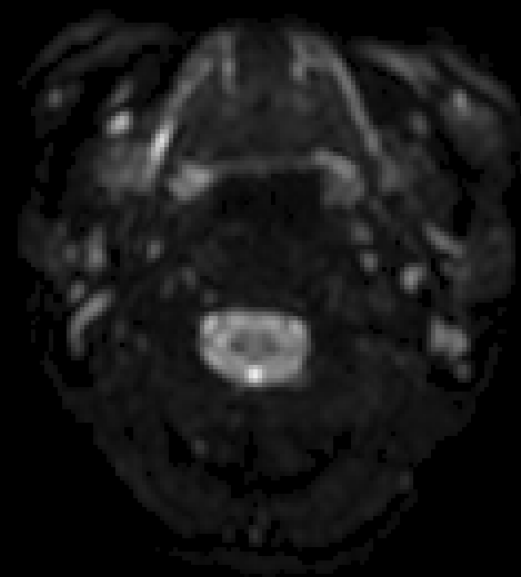

# Network instance 13

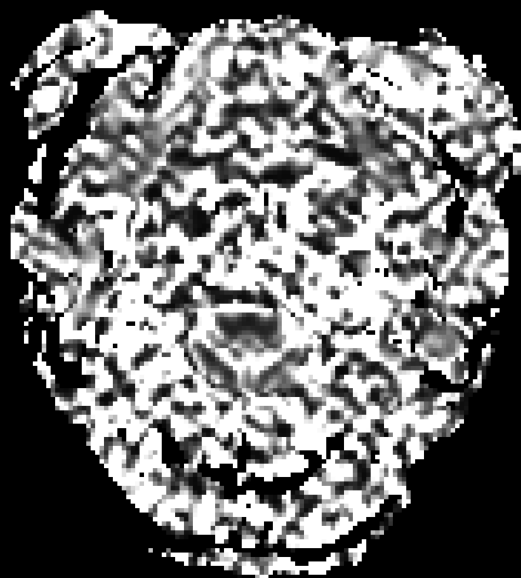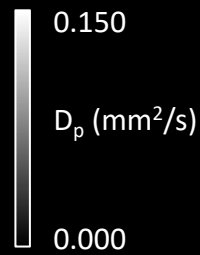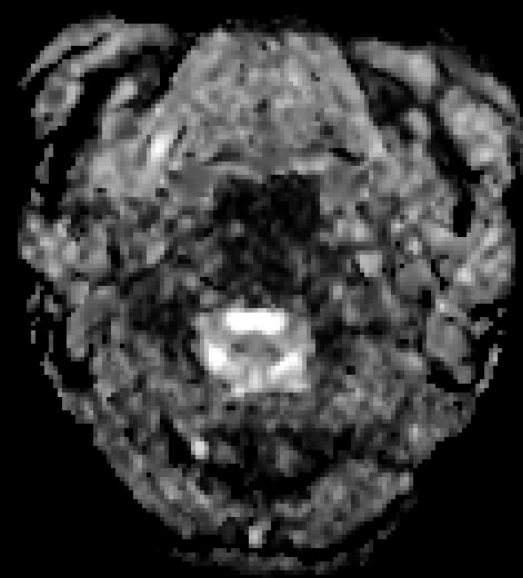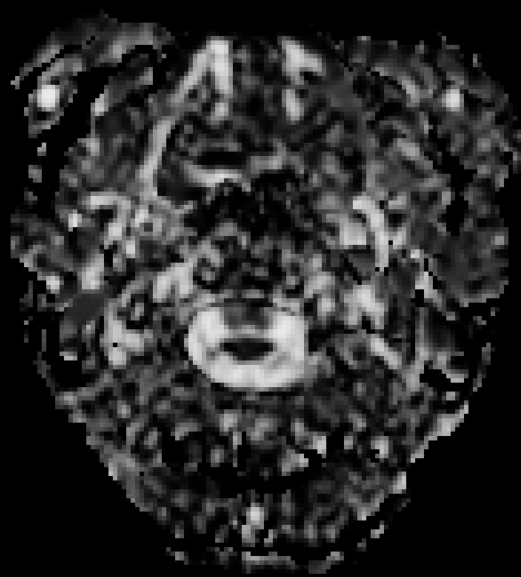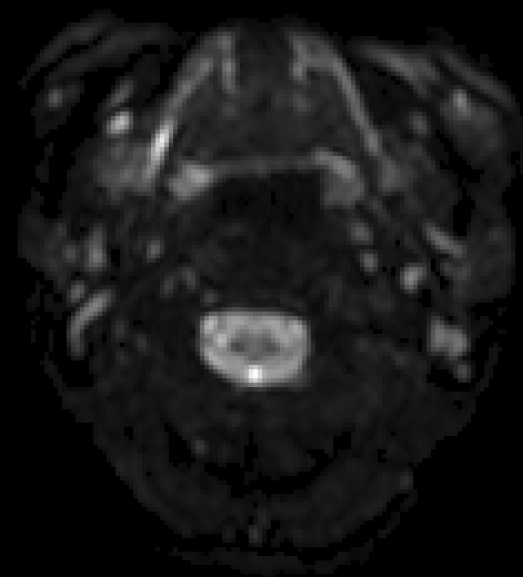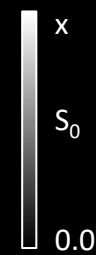

# Network instance 14

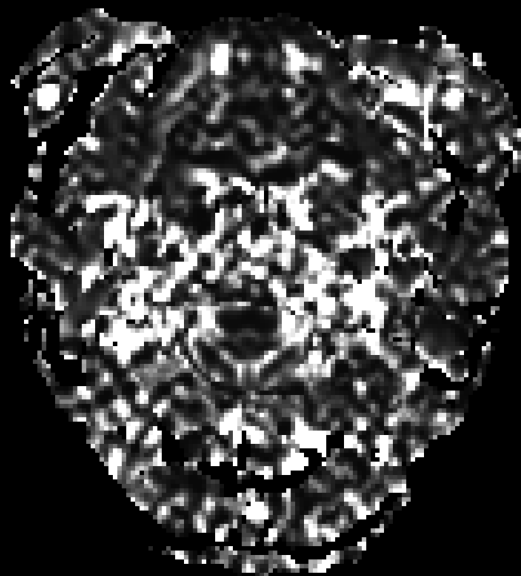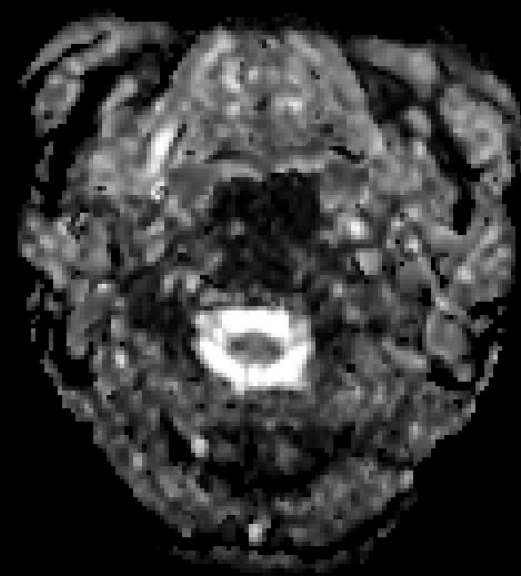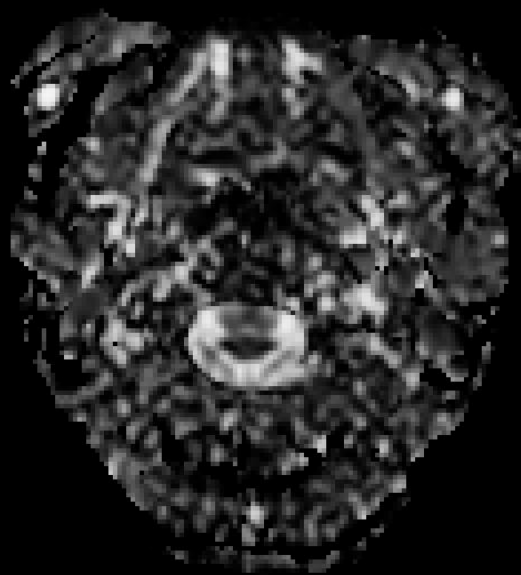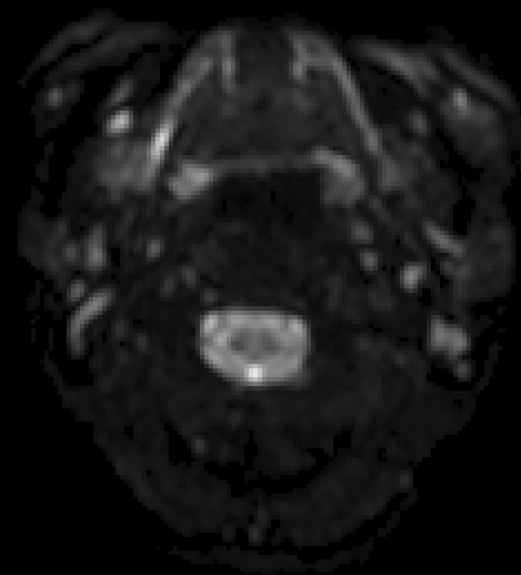



# Network instance 15

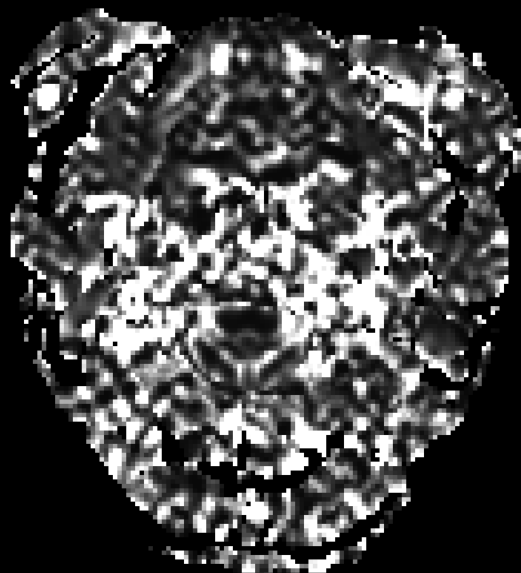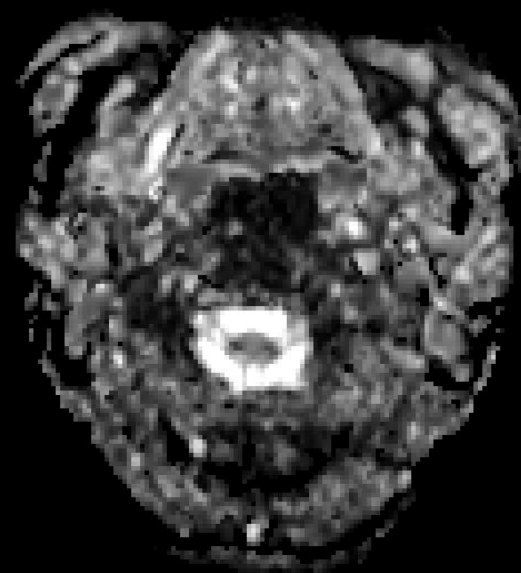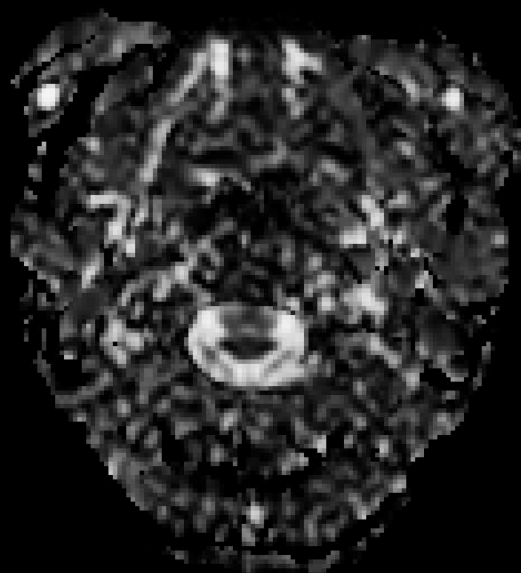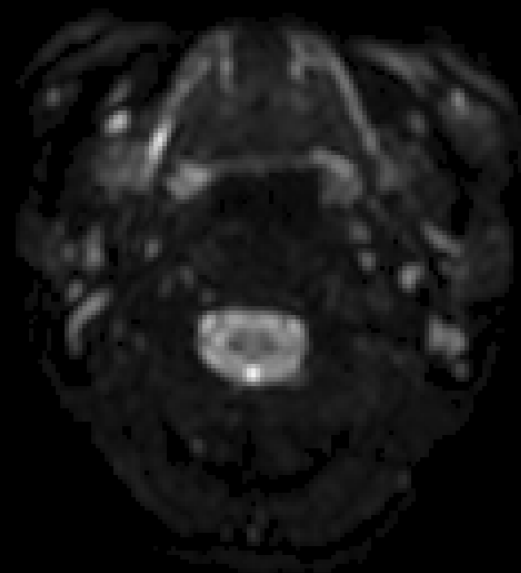

# Network instance 16

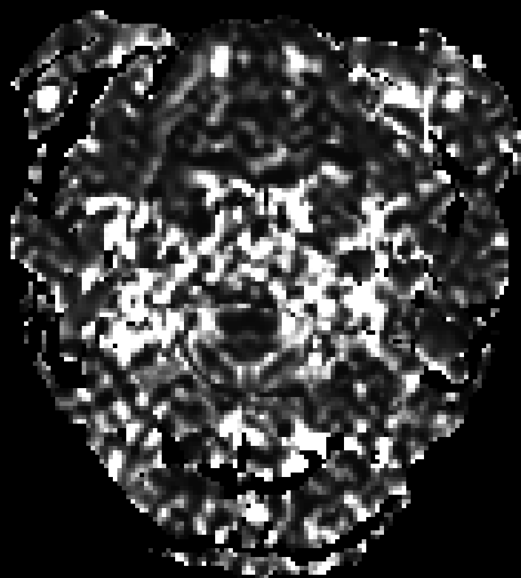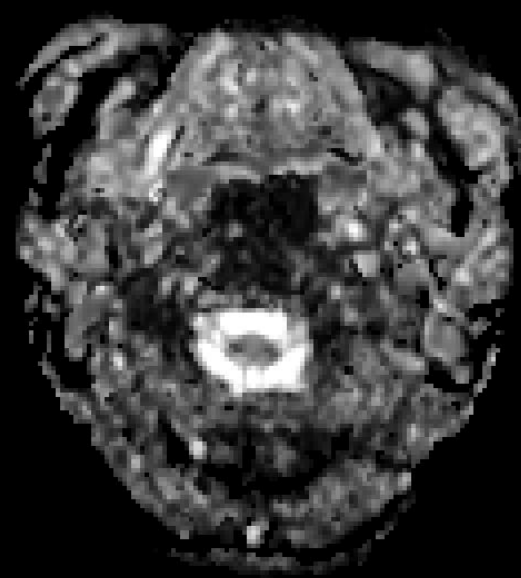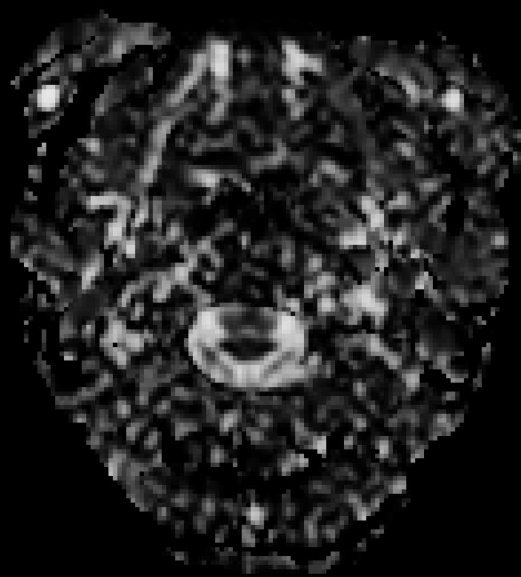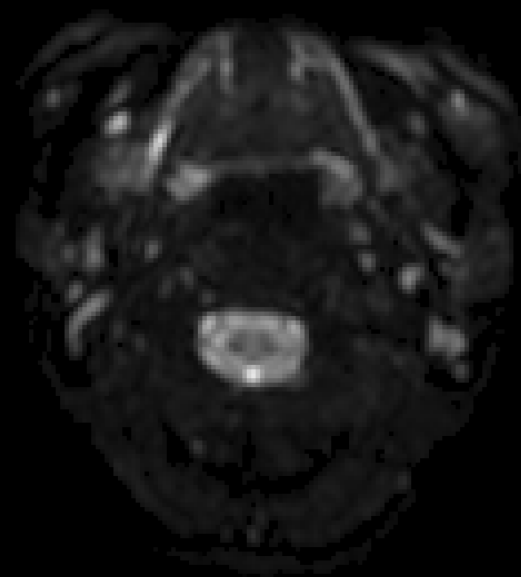

# Network instance 17

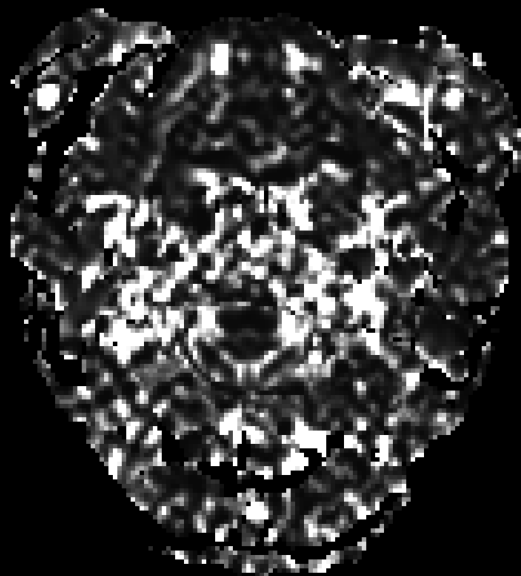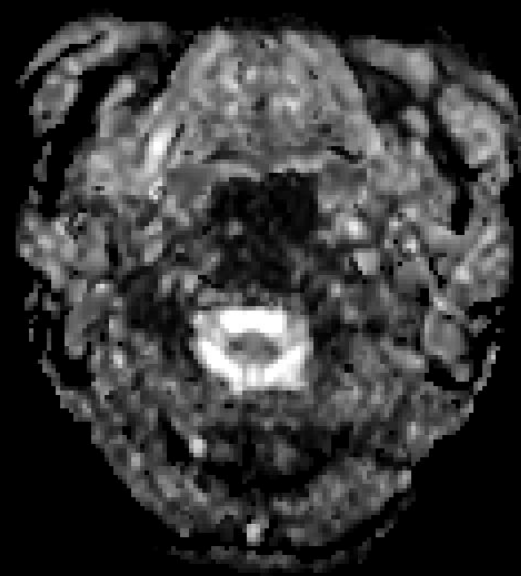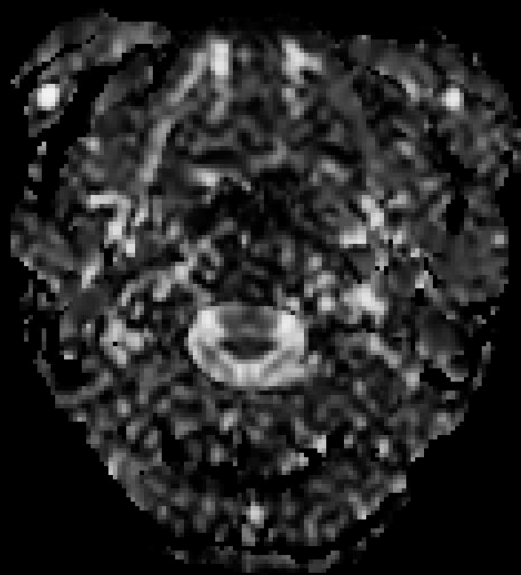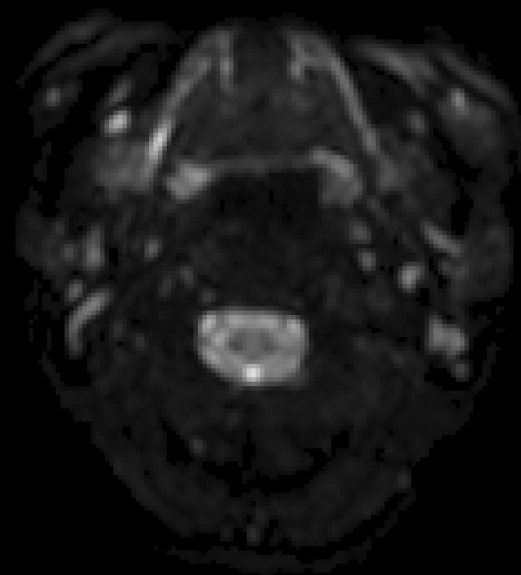

# Network instance 18

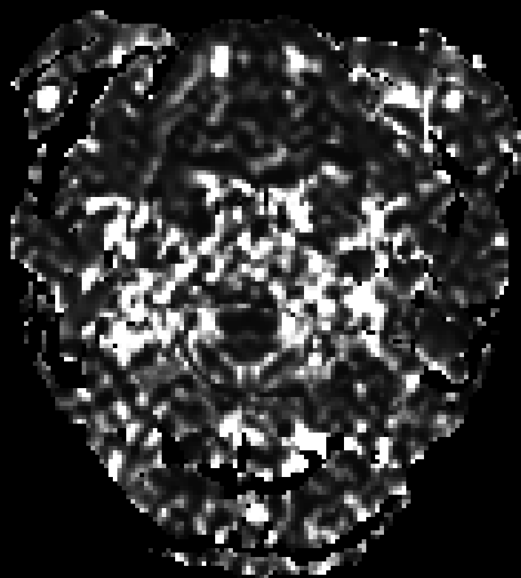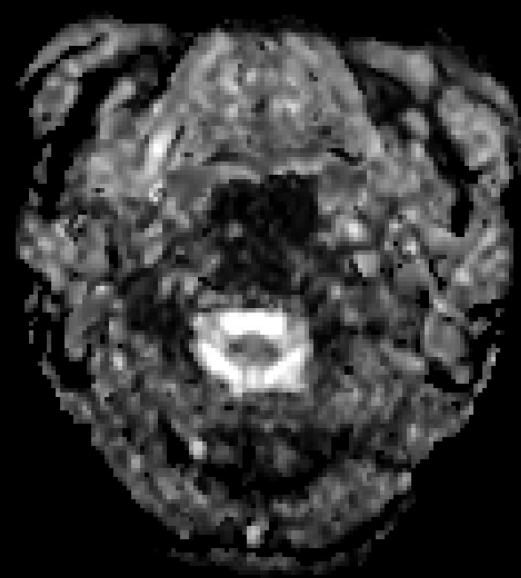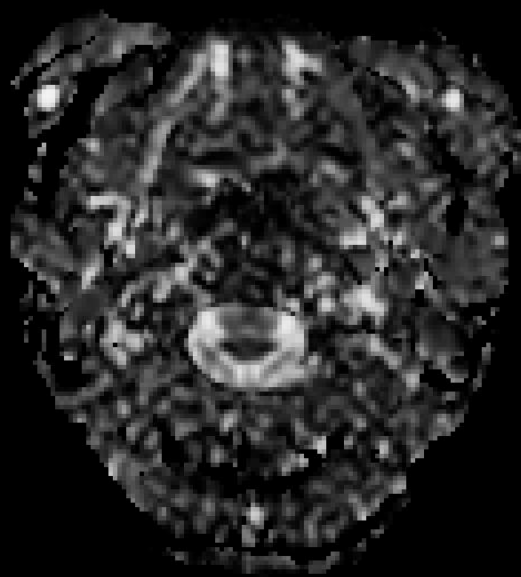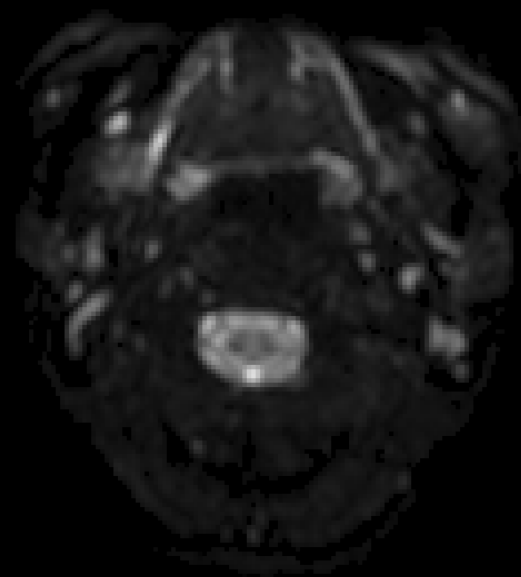

# Network instance 19

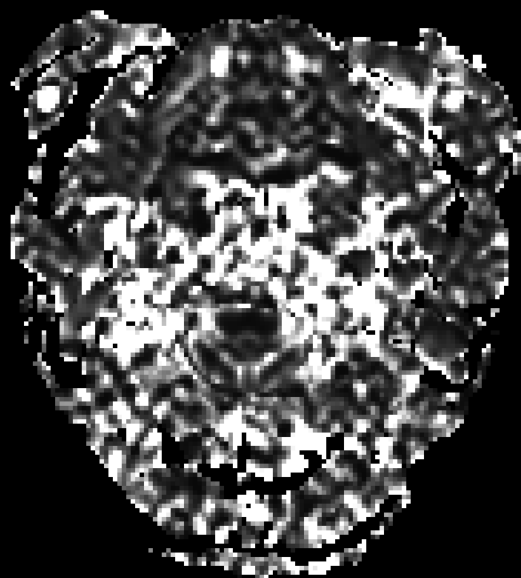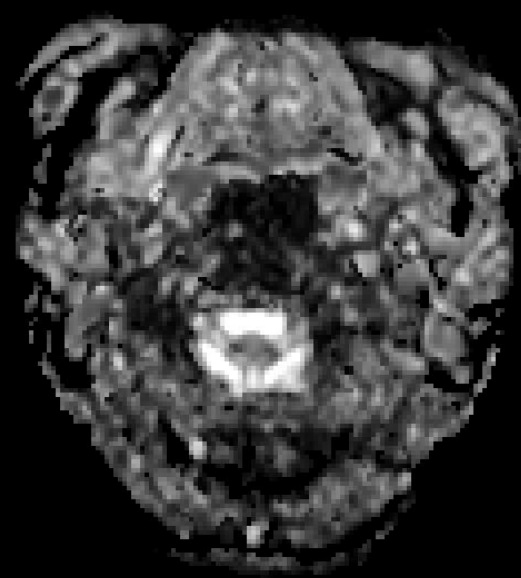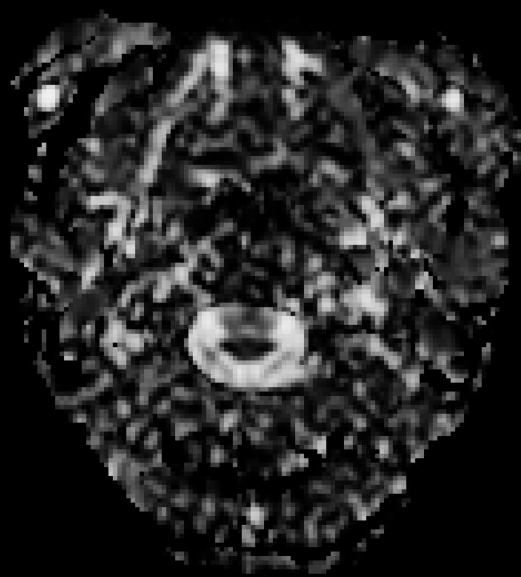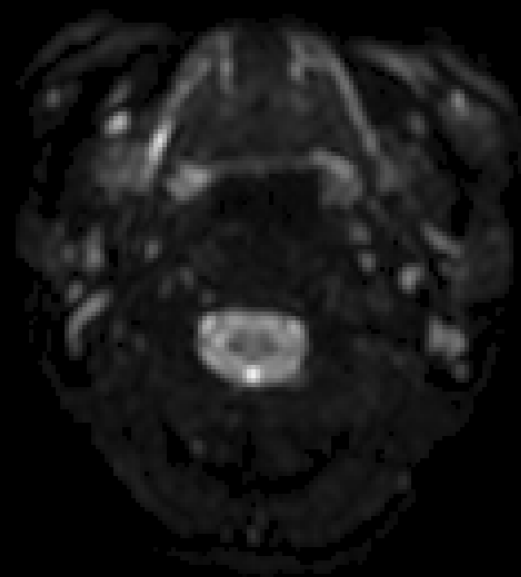

# Network instance 20

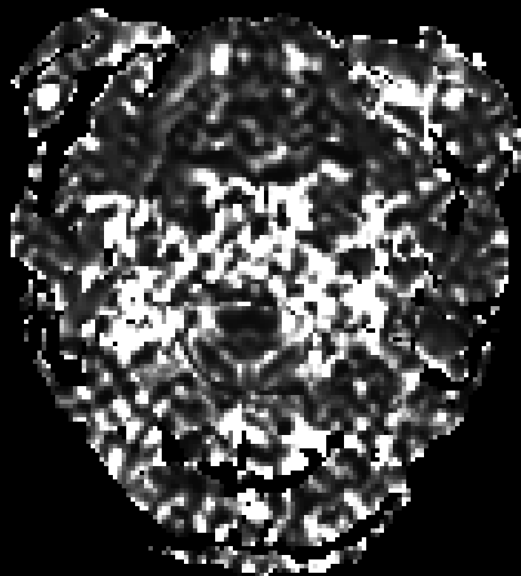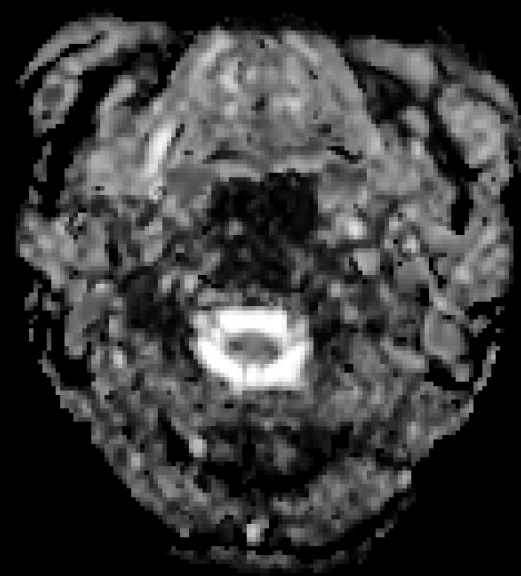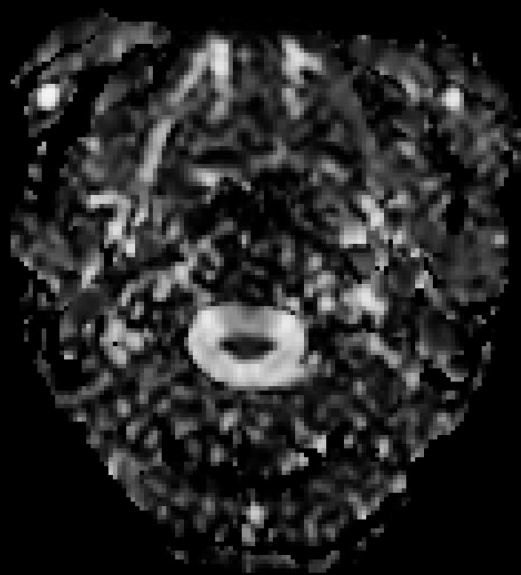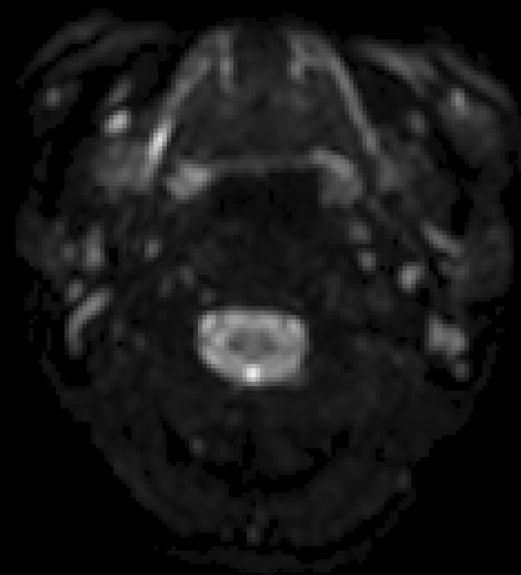

# Network instance 21

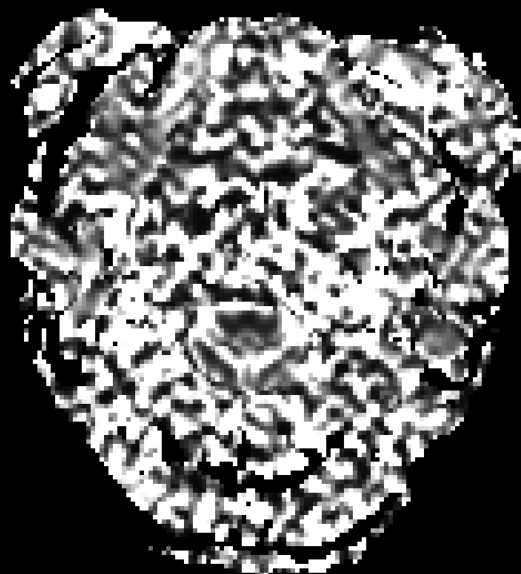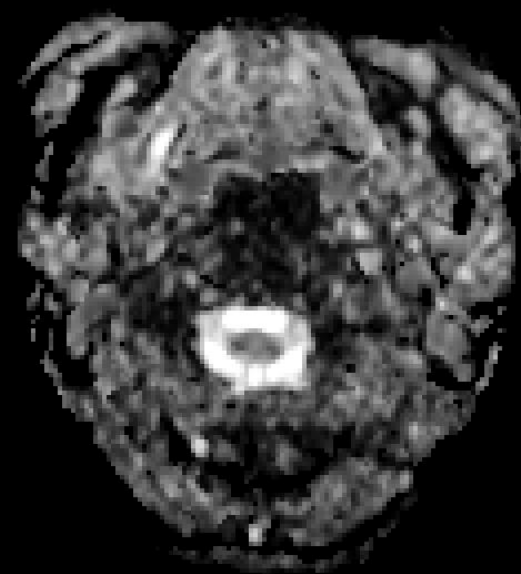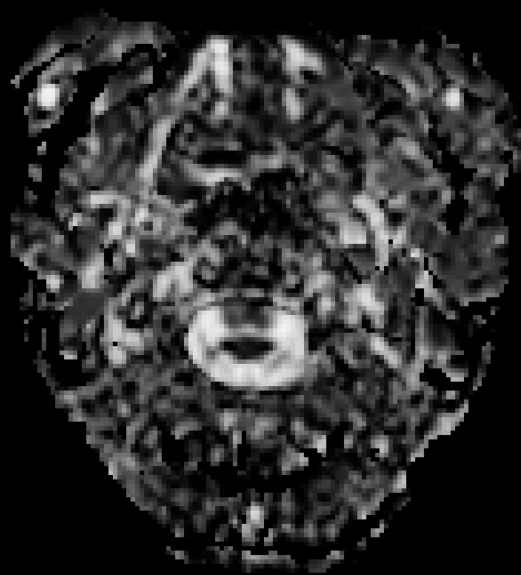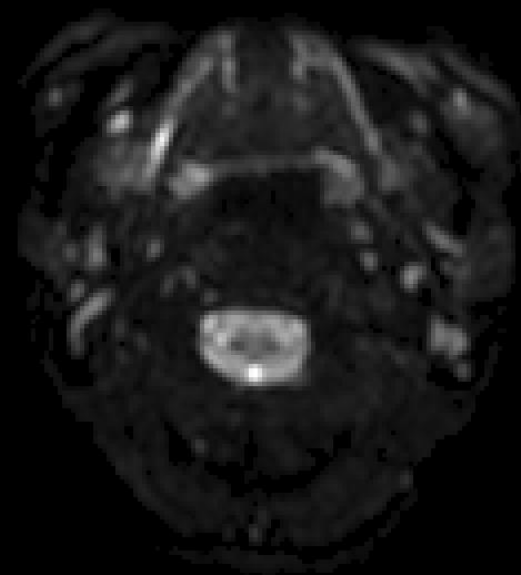

# Network instance 22

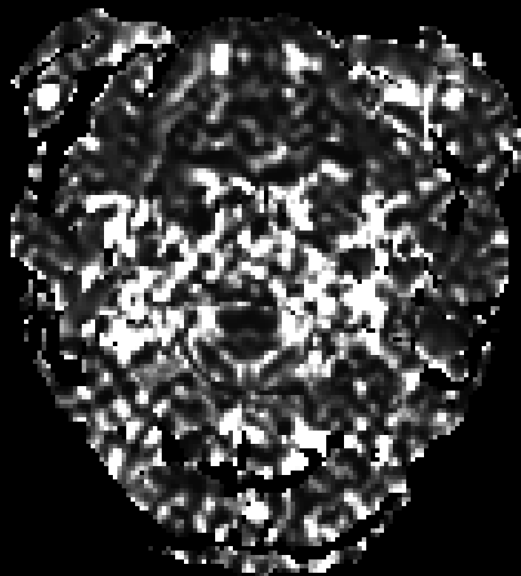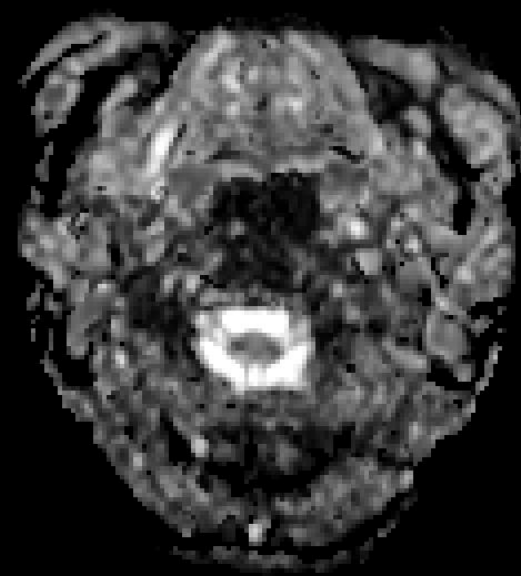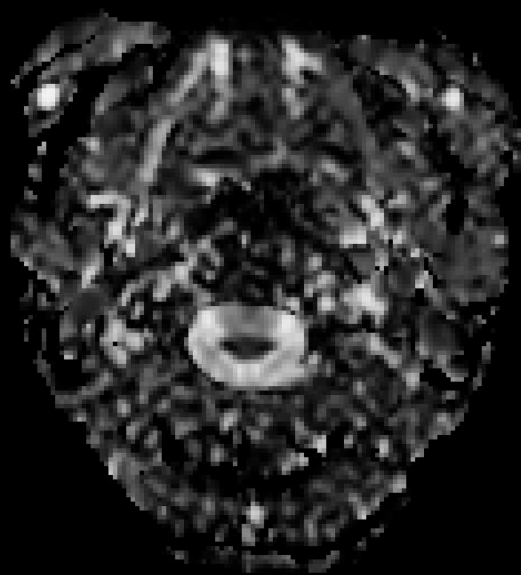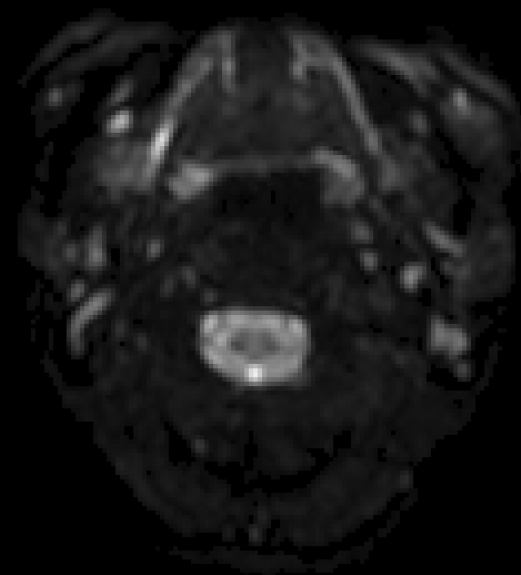



# Network instance 23

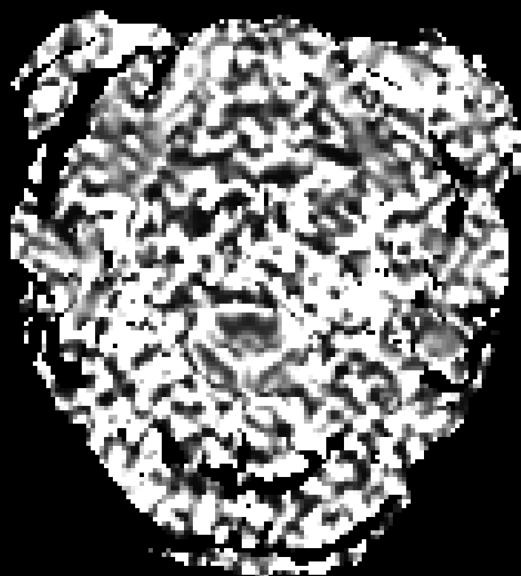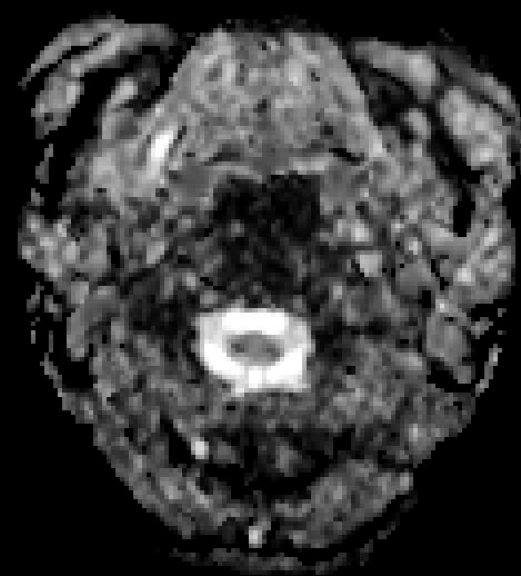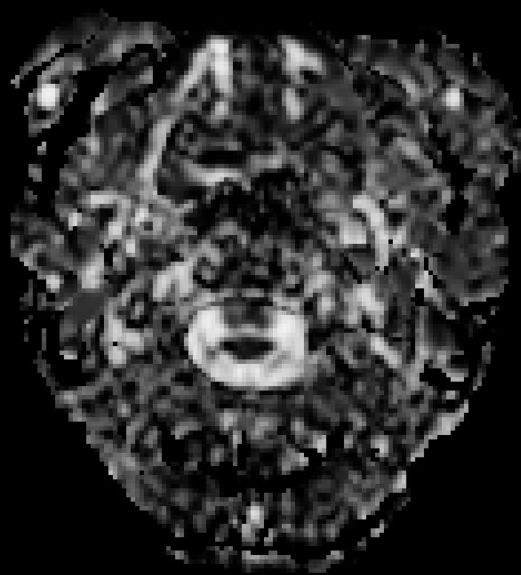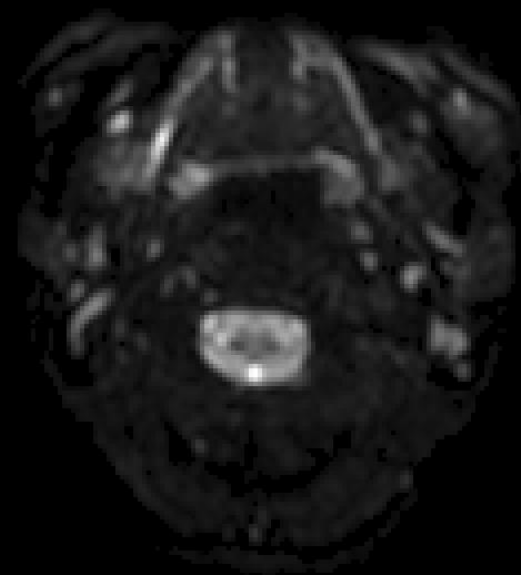

# Network instance 24

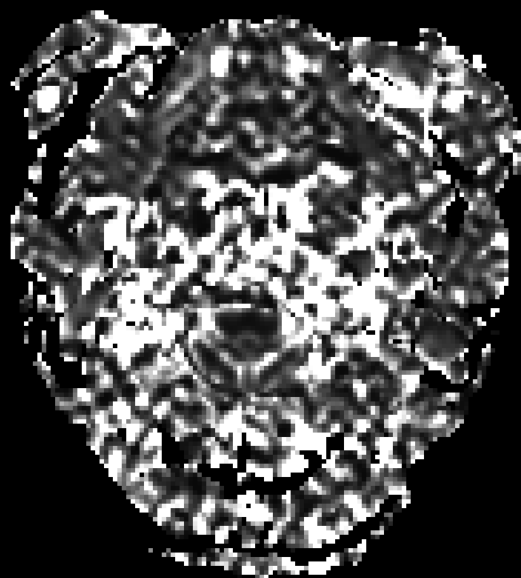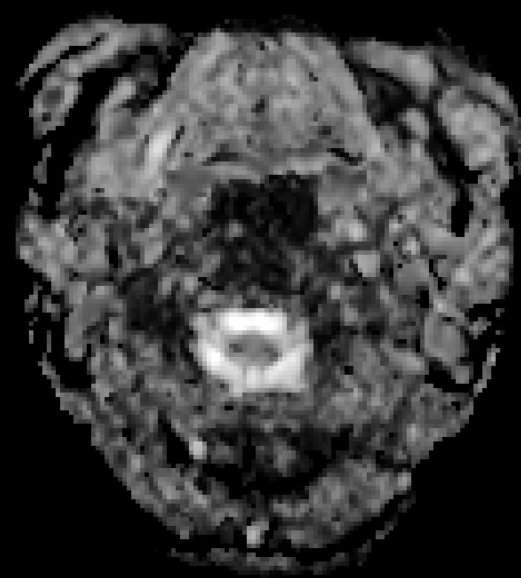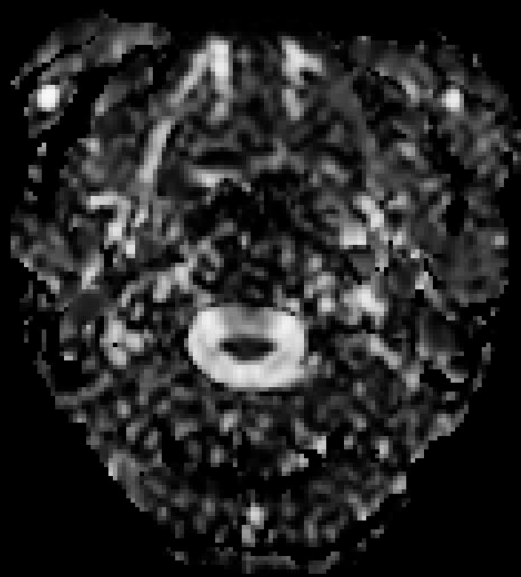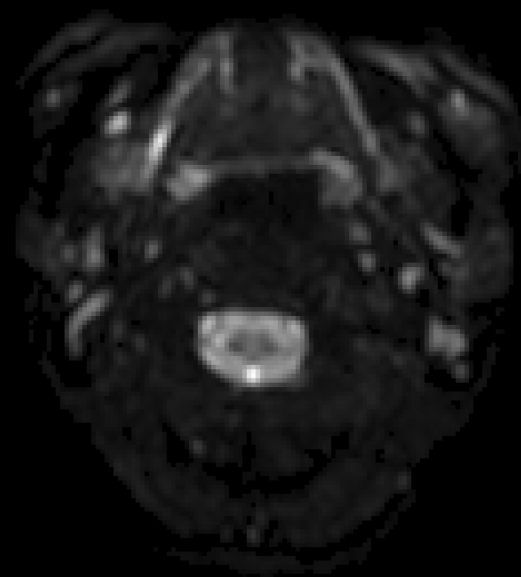

# Network instance 25

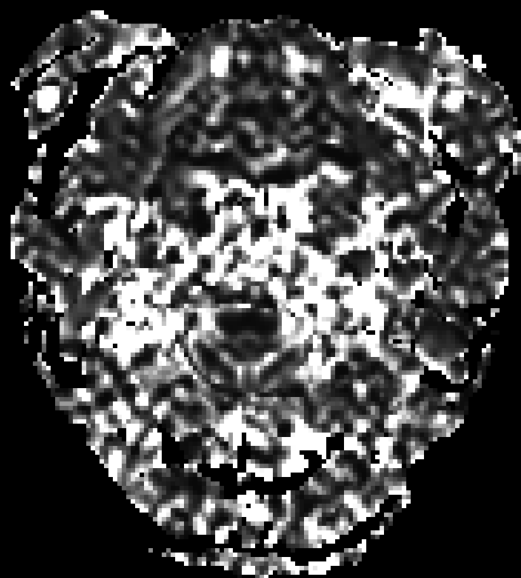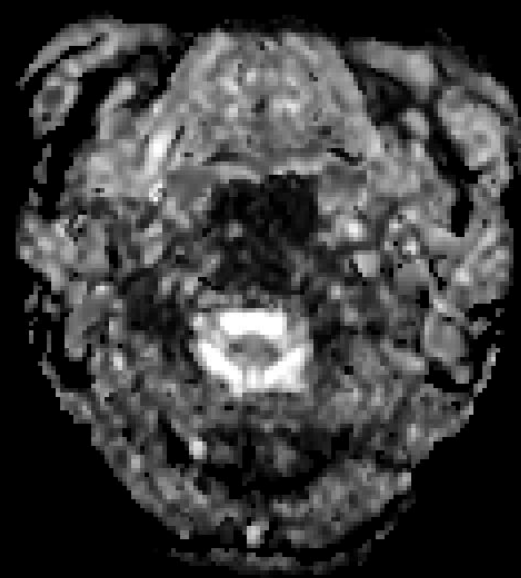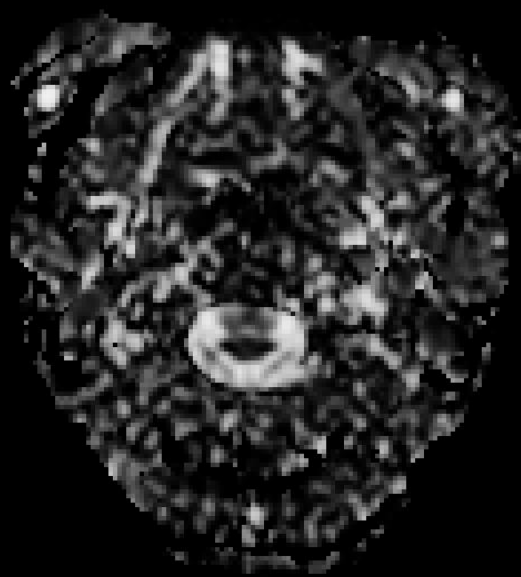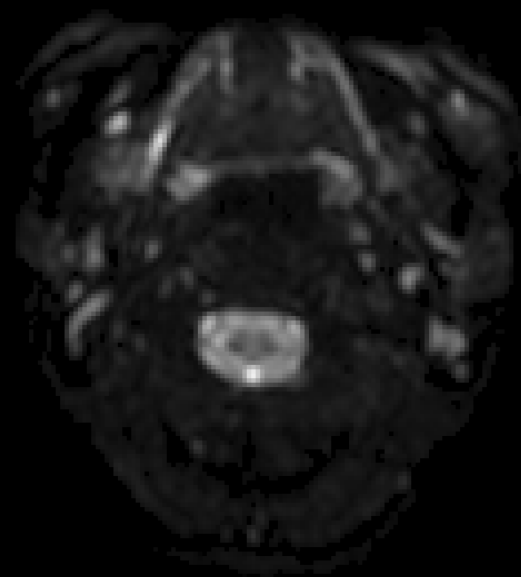

# Network instance 26

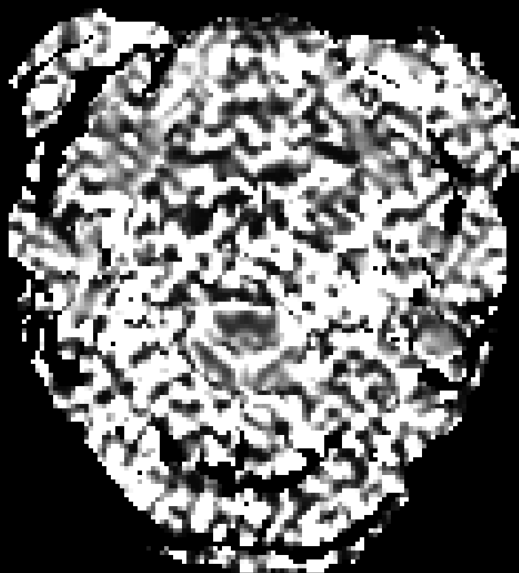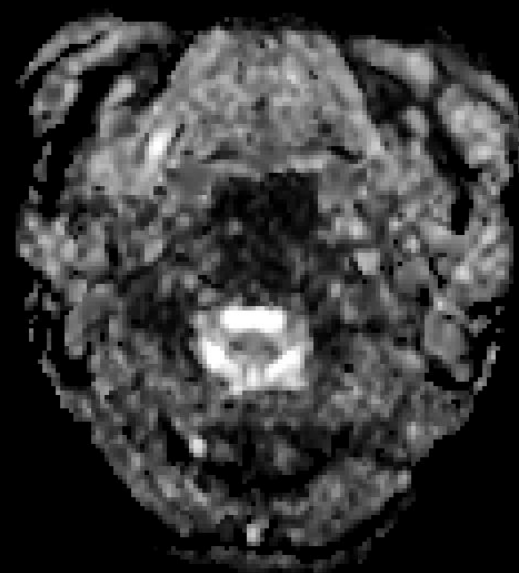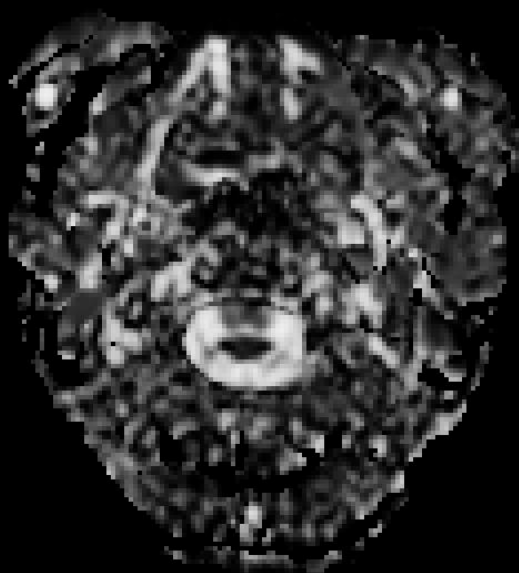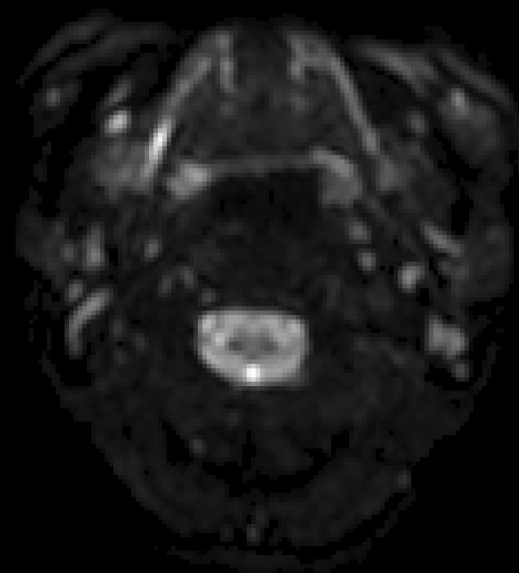

Network instance 27

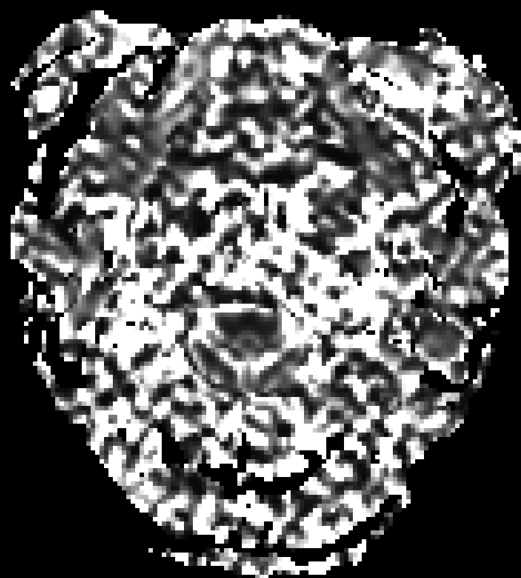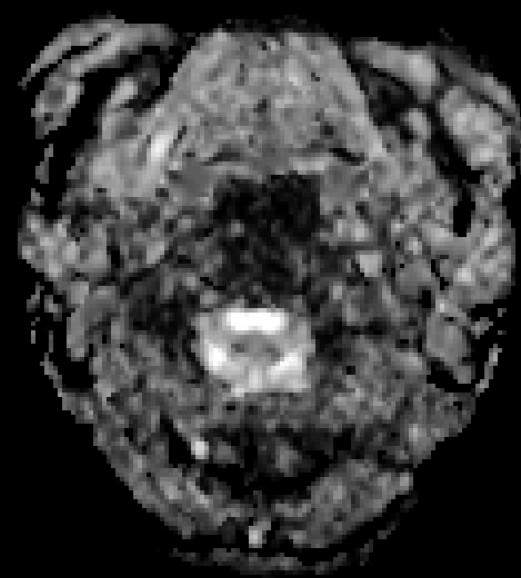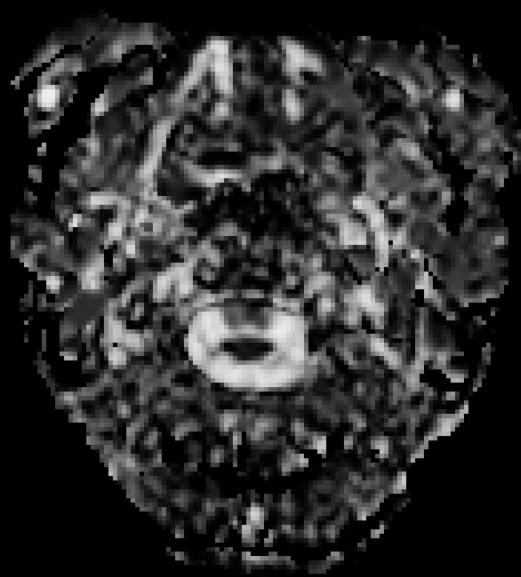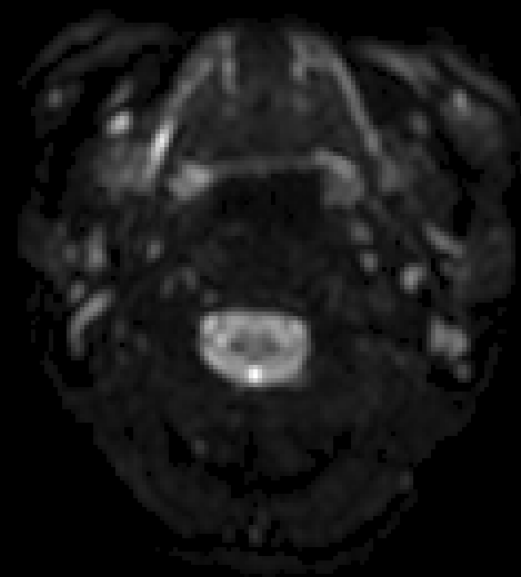

# Network instance 28

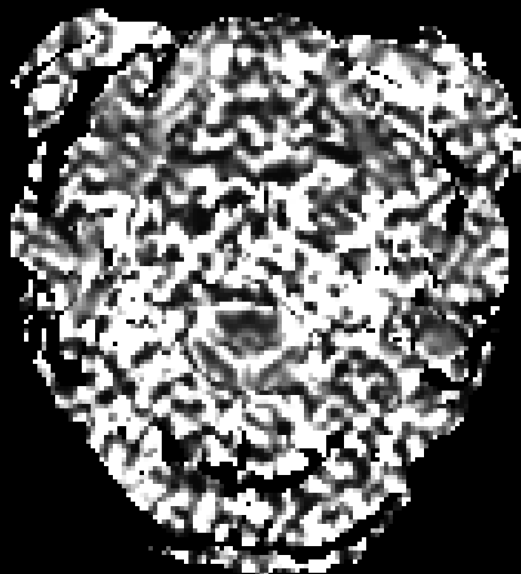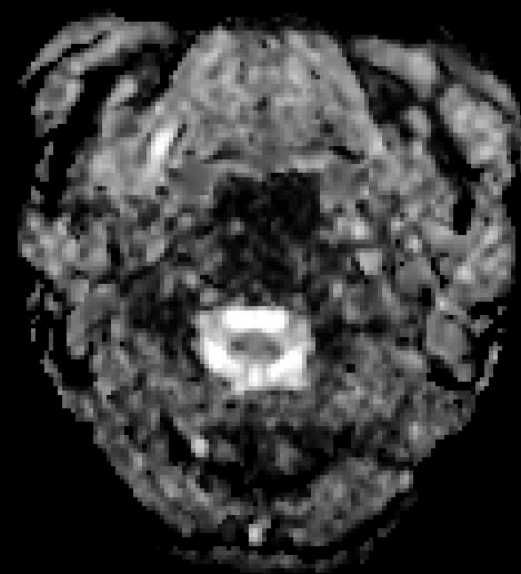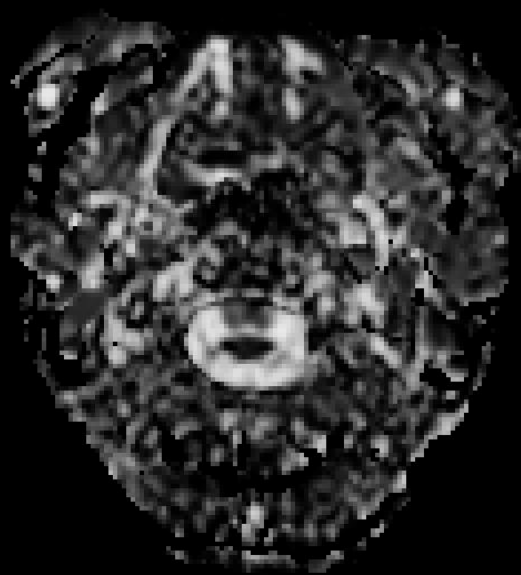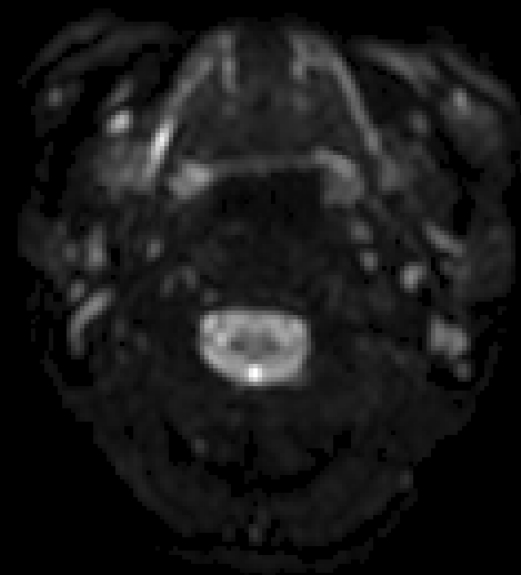

# Network instance 29

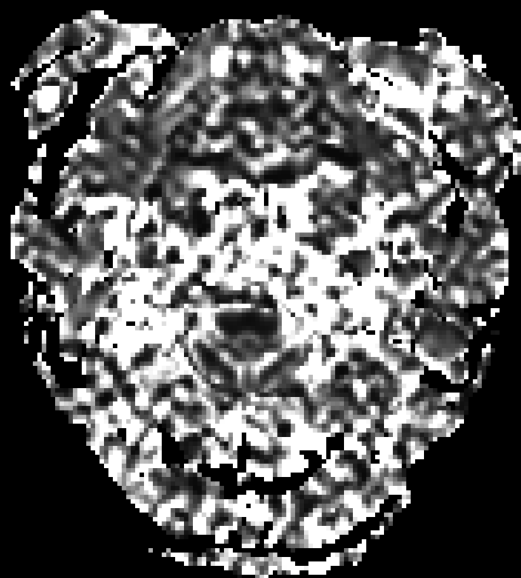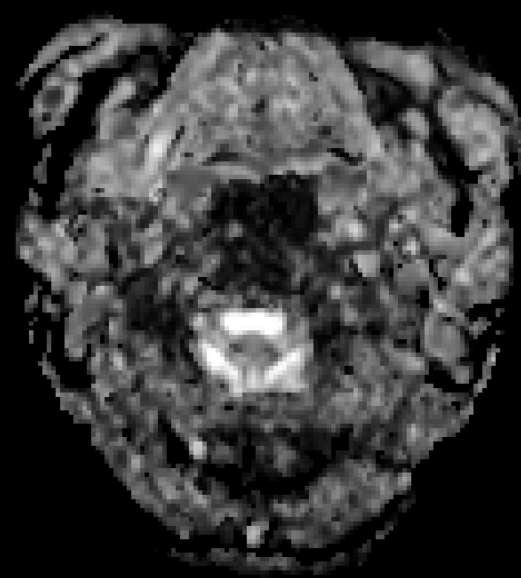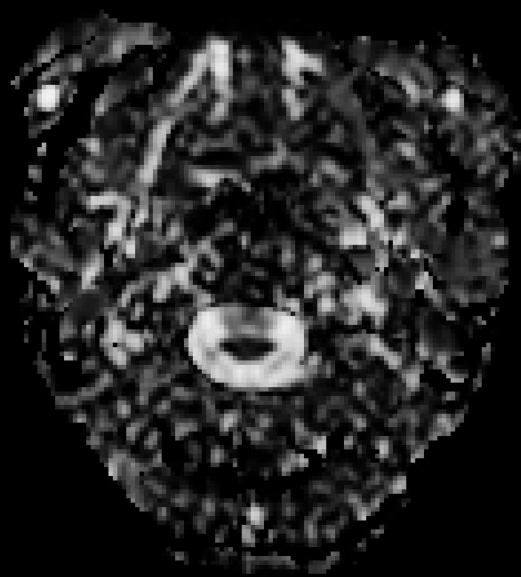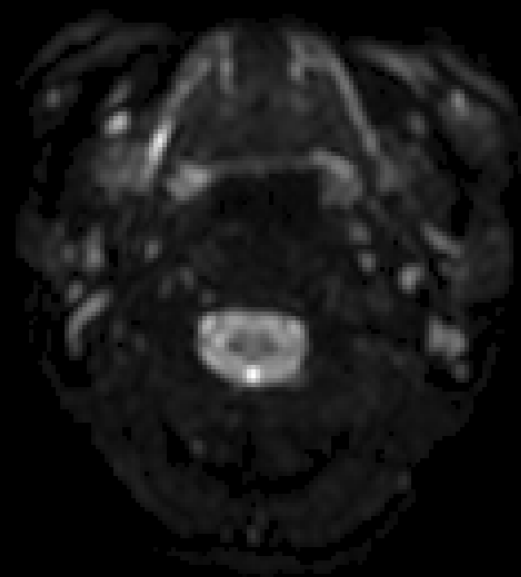

# Network instance 30

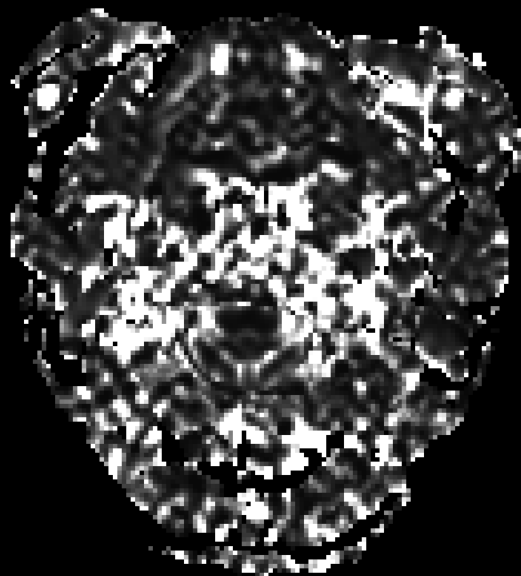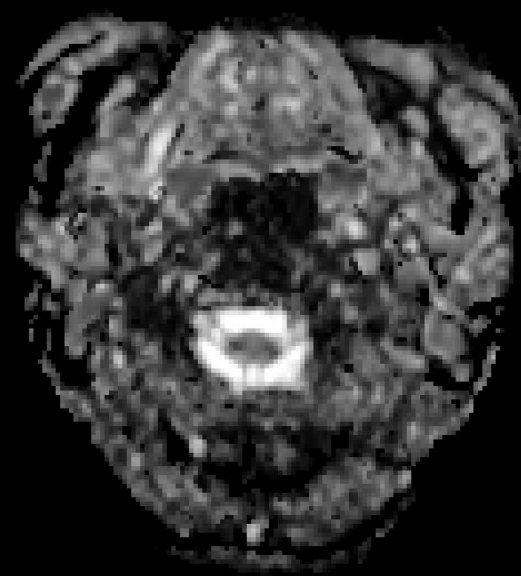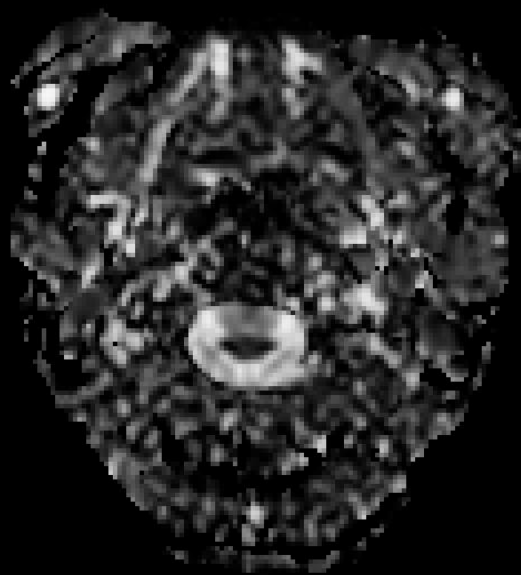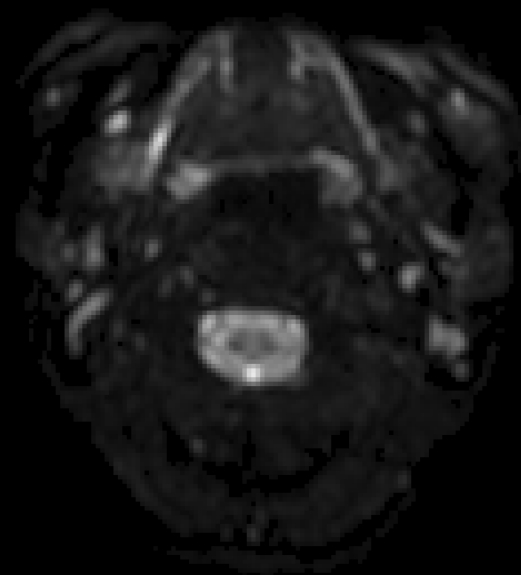



# Network instance 31

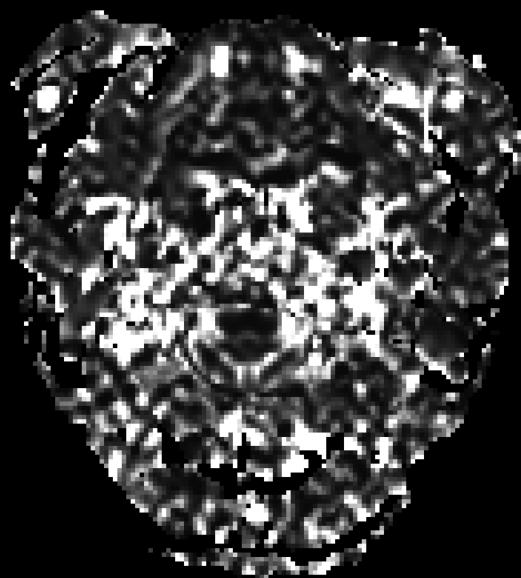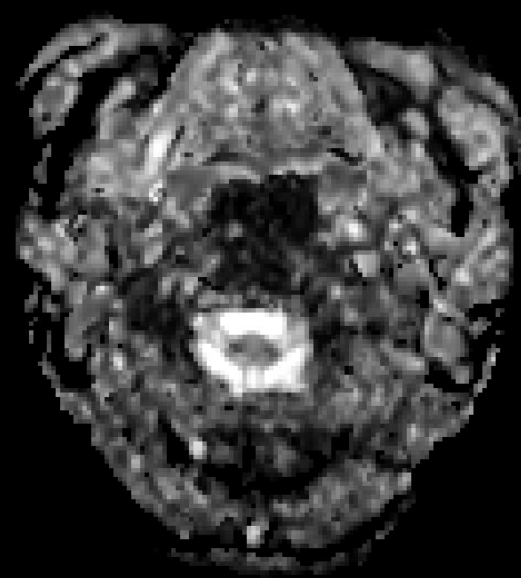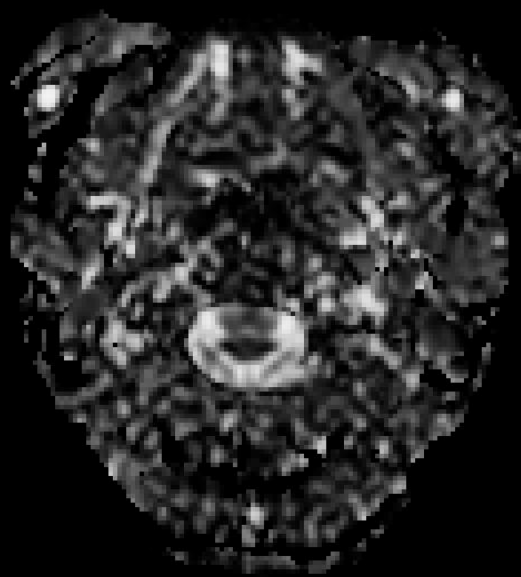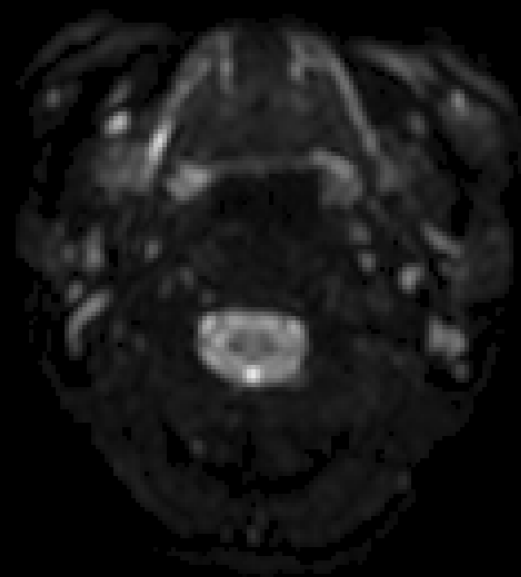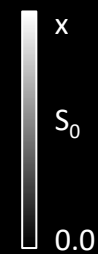

# Network instance 32

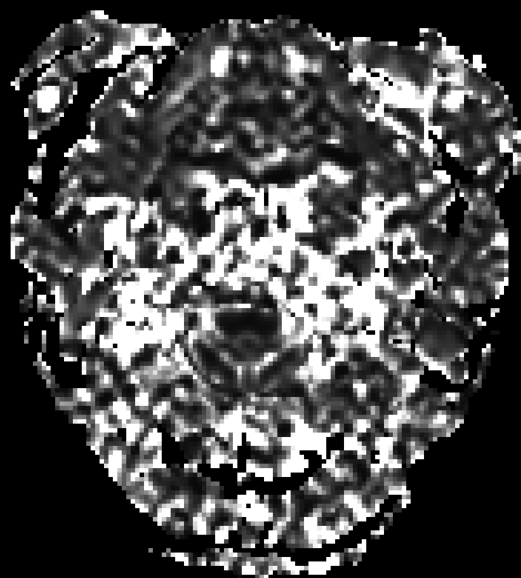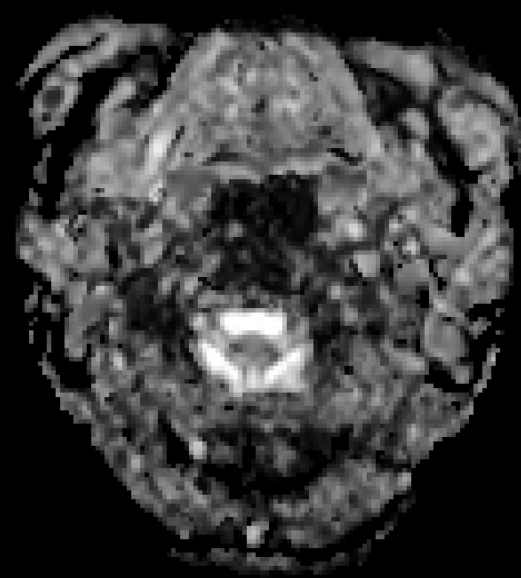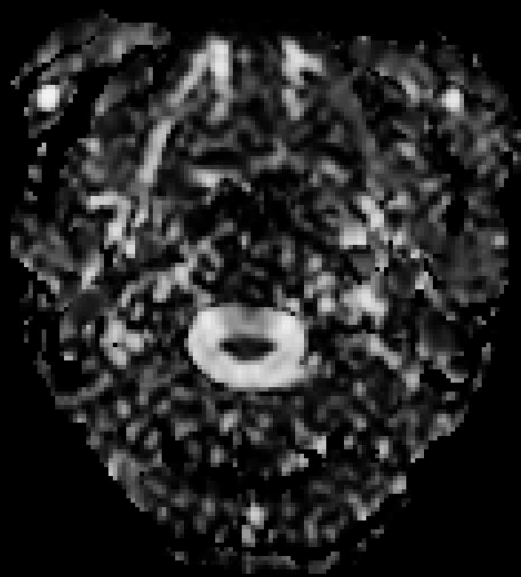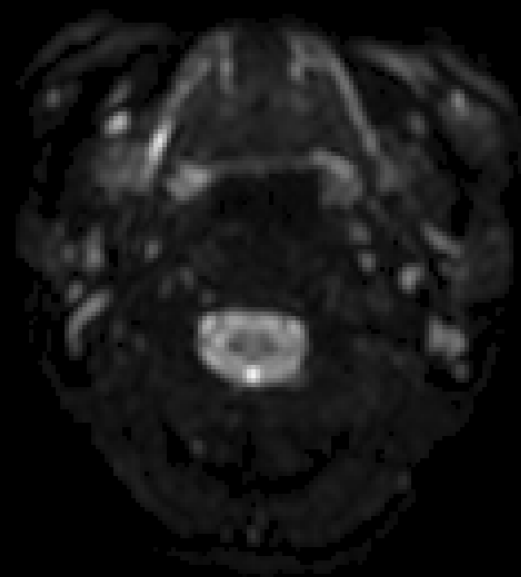

# Network instance 33

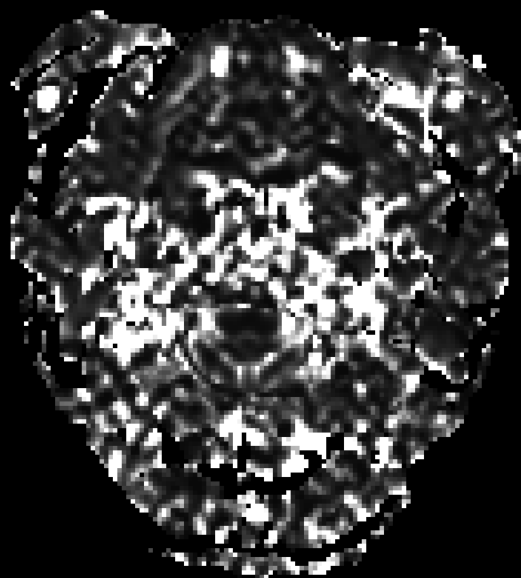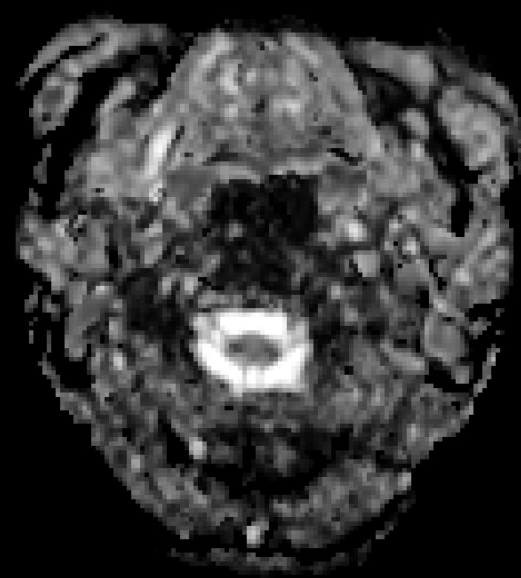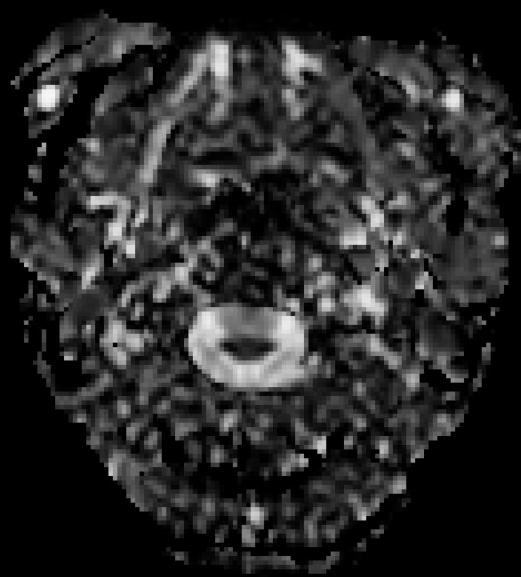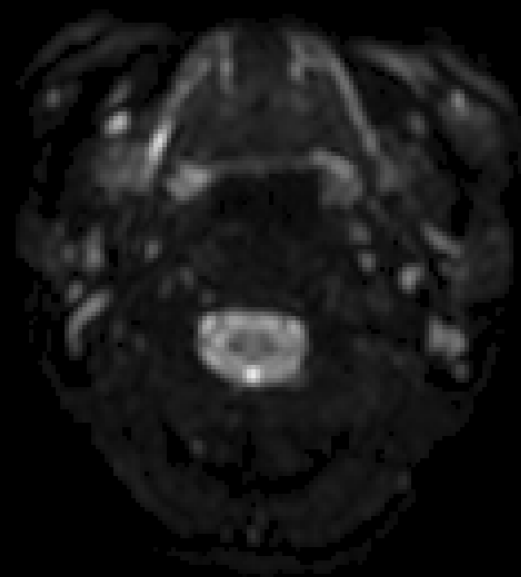

# Network instance 34

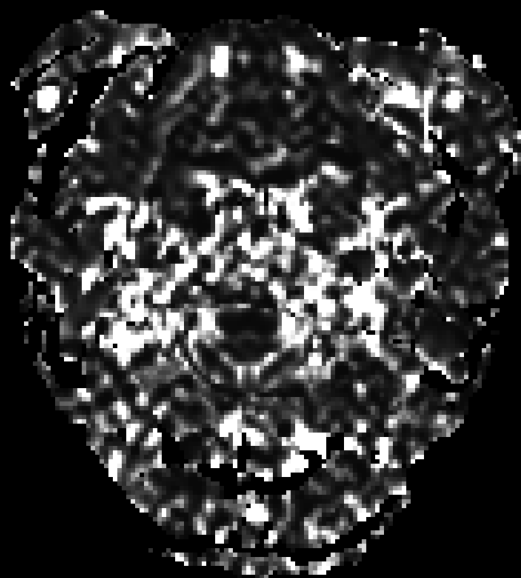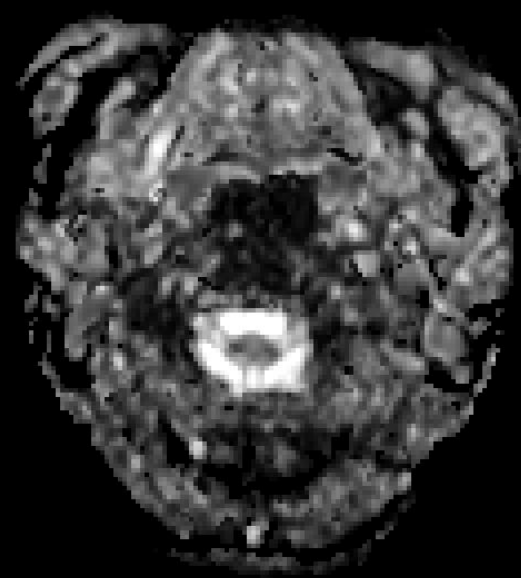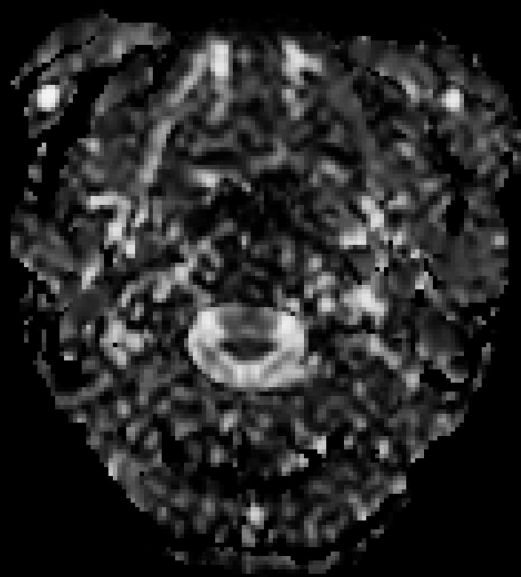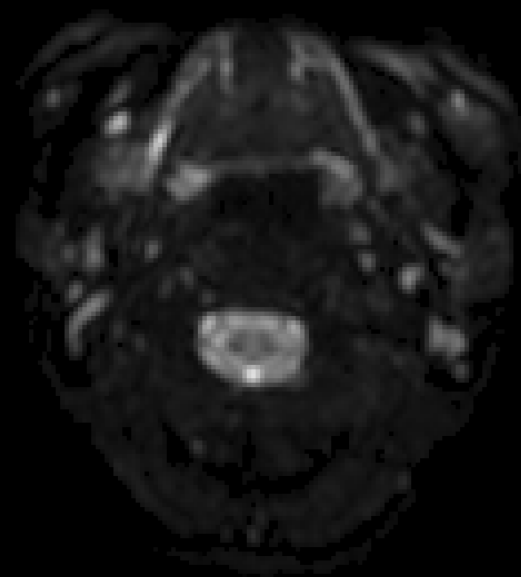

# Network instance 35

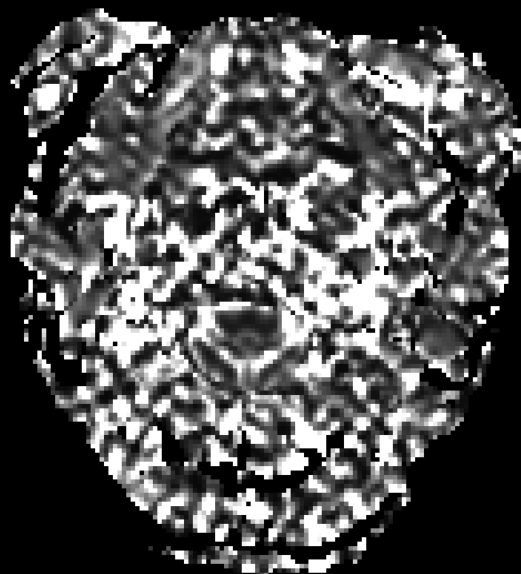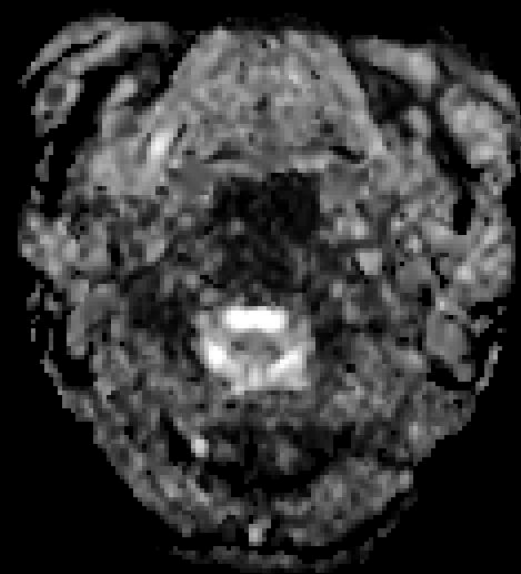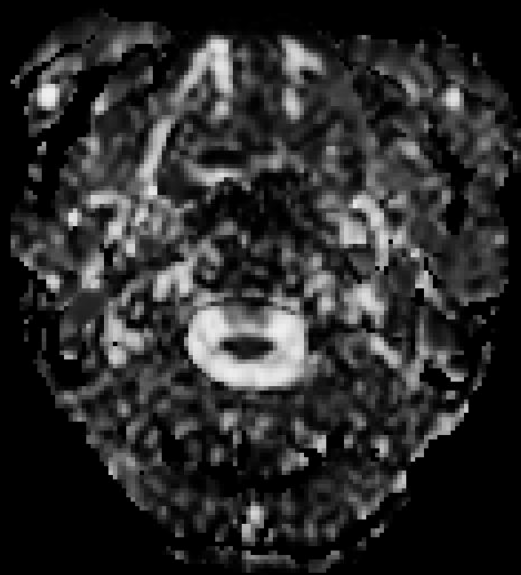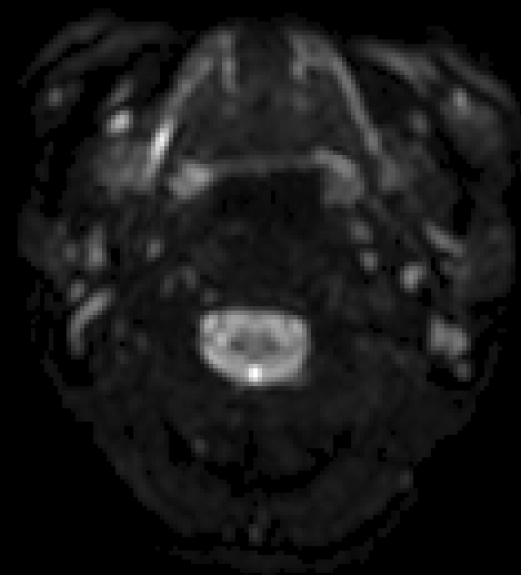

# Network instance 36

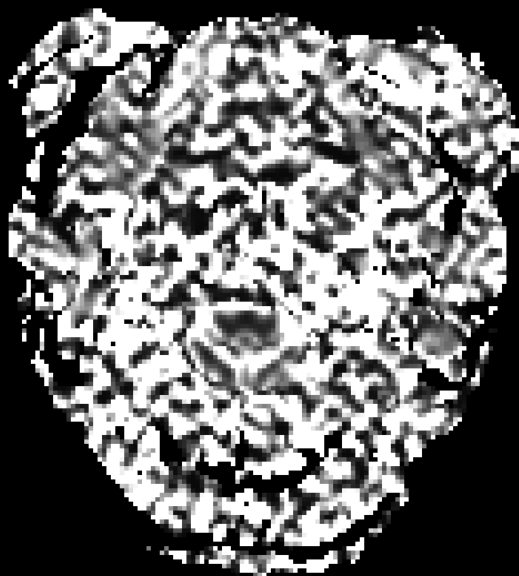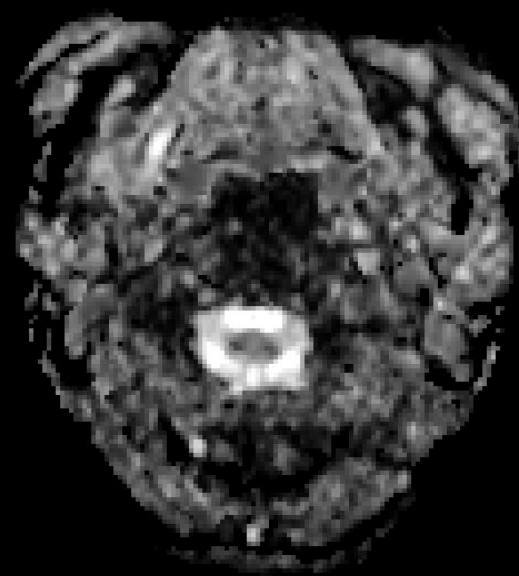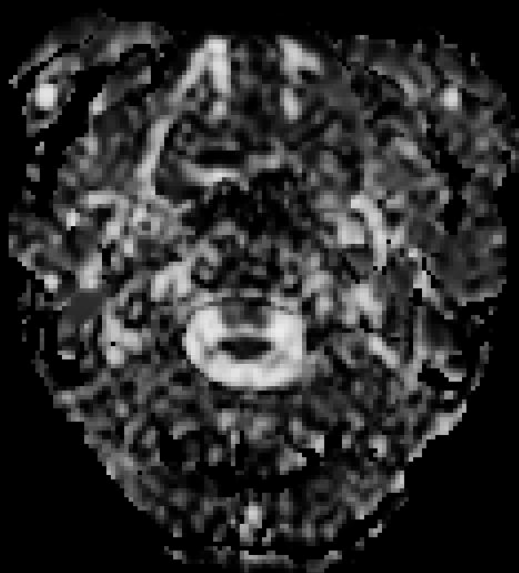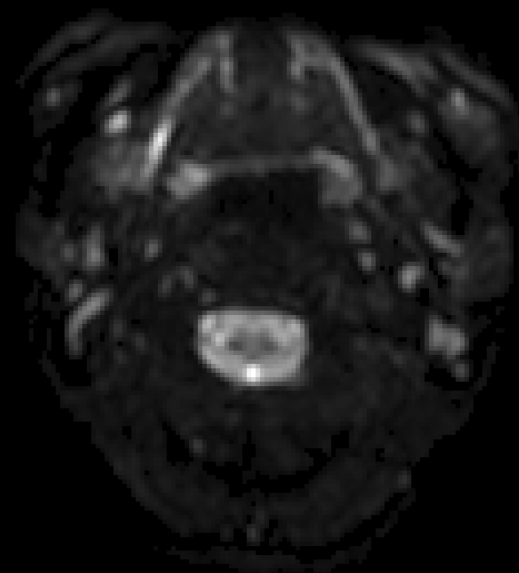

# Network instance 37

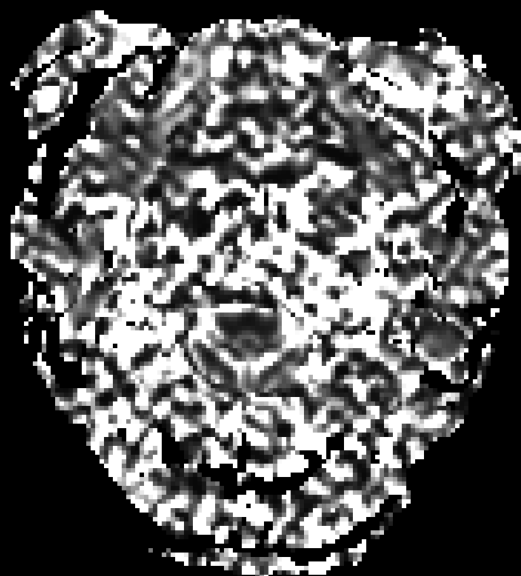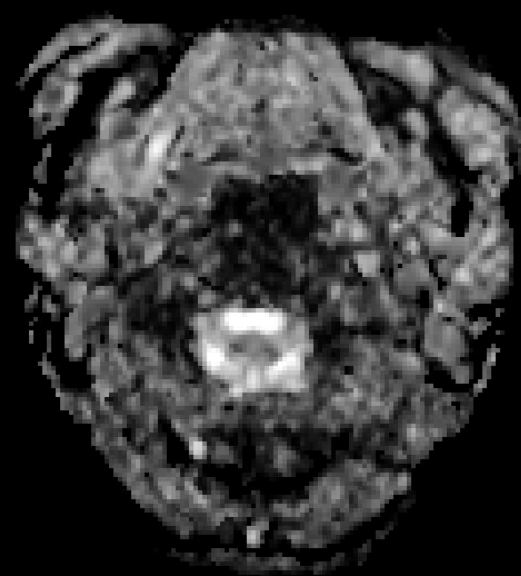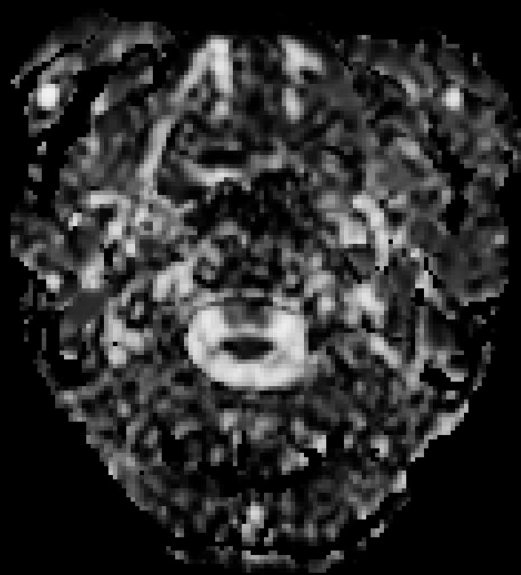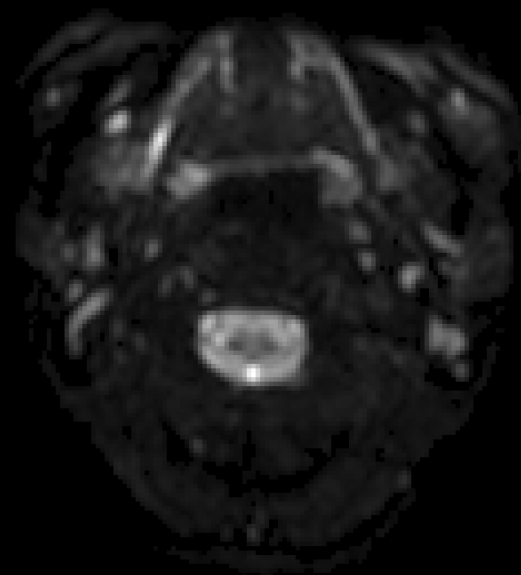

# Network instance 38

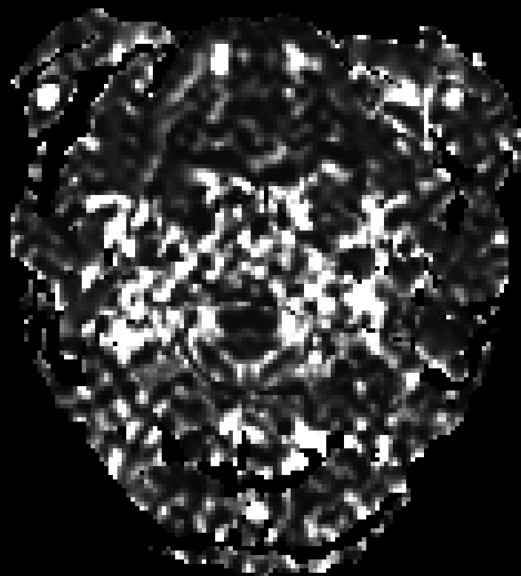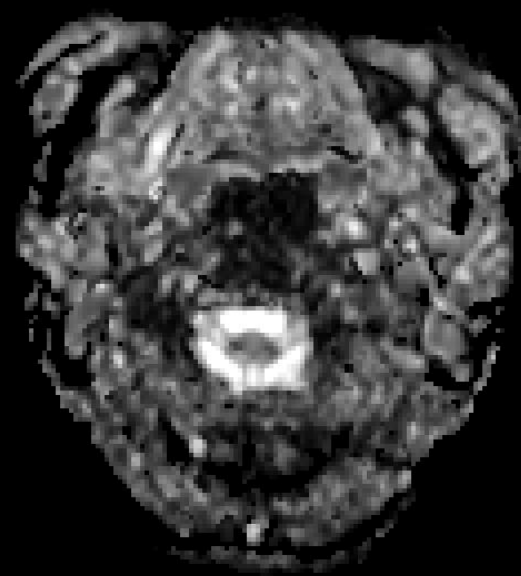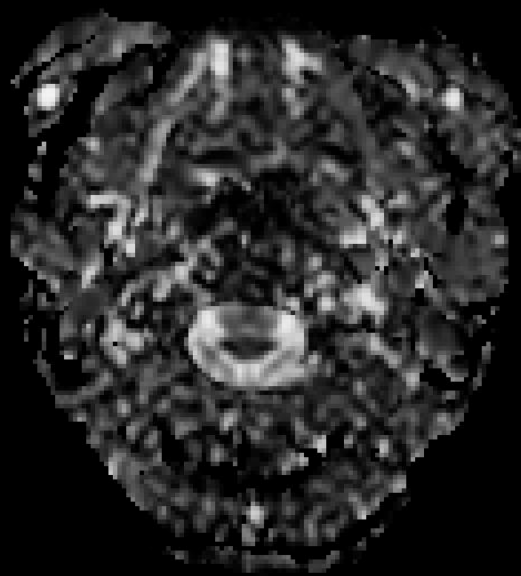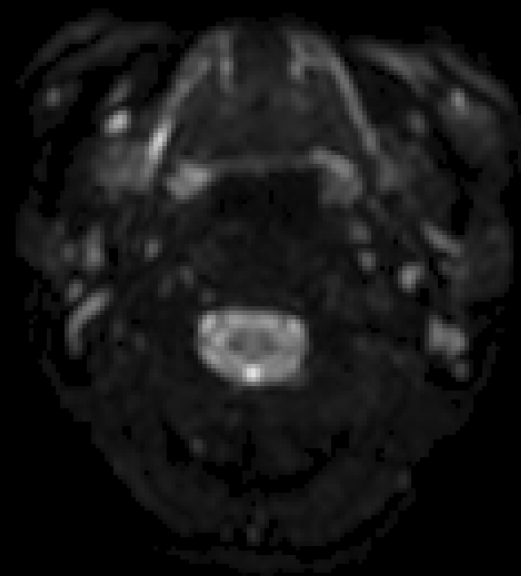



# Network instance 39

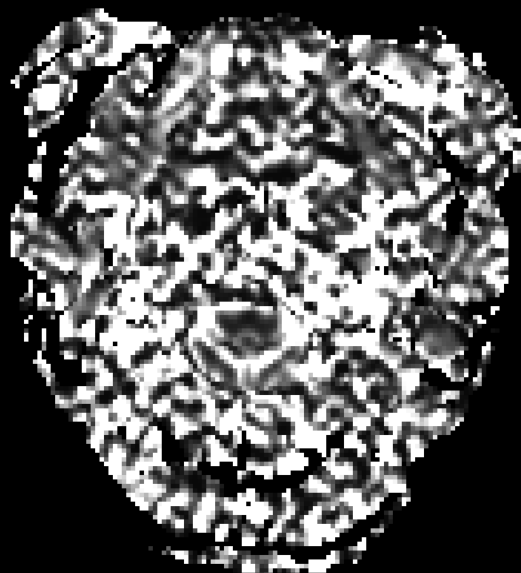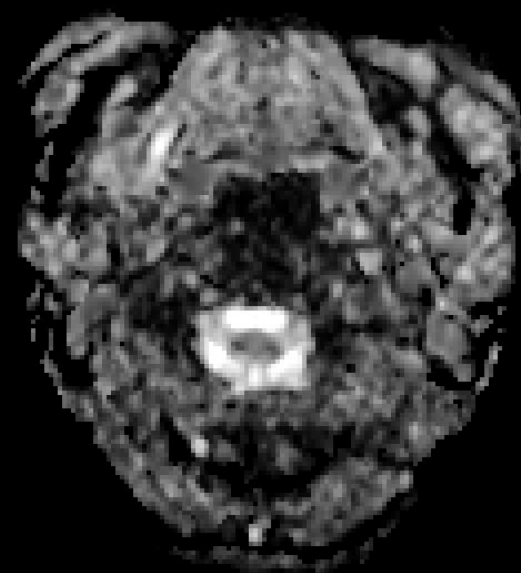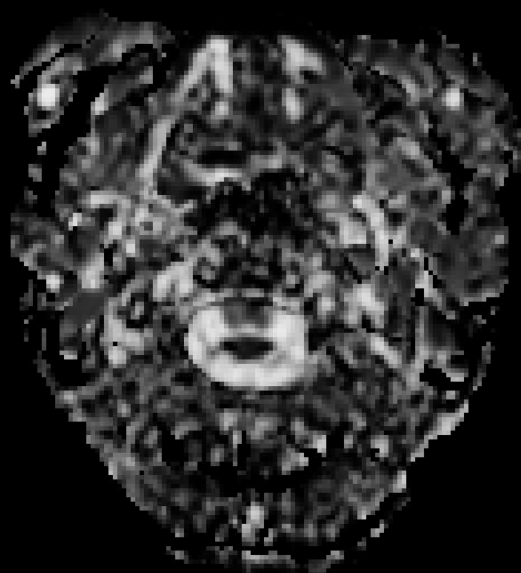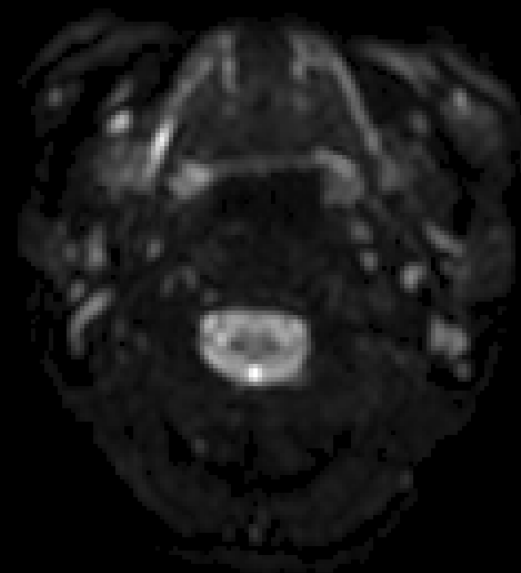

# Network instance 40

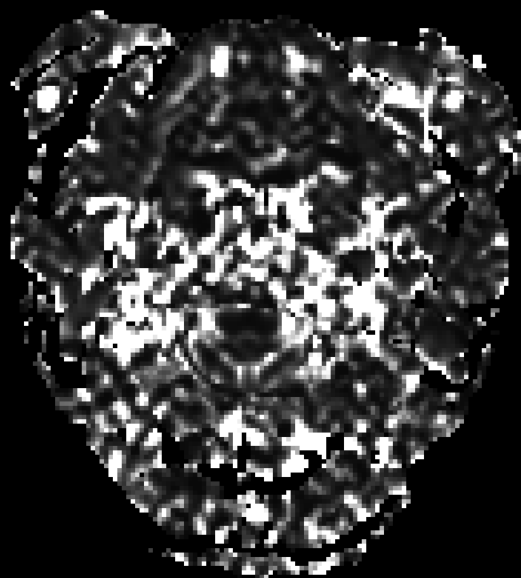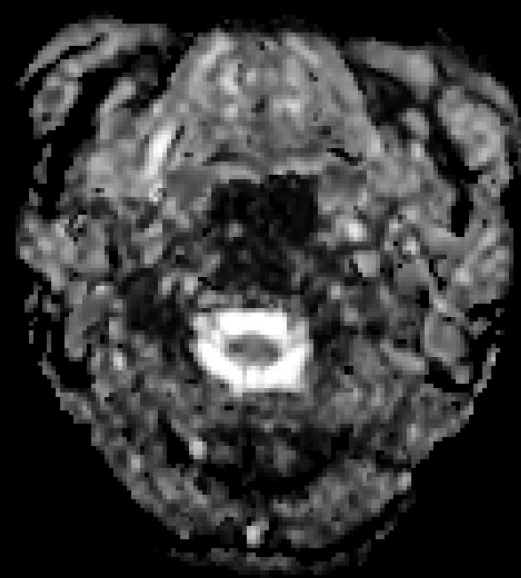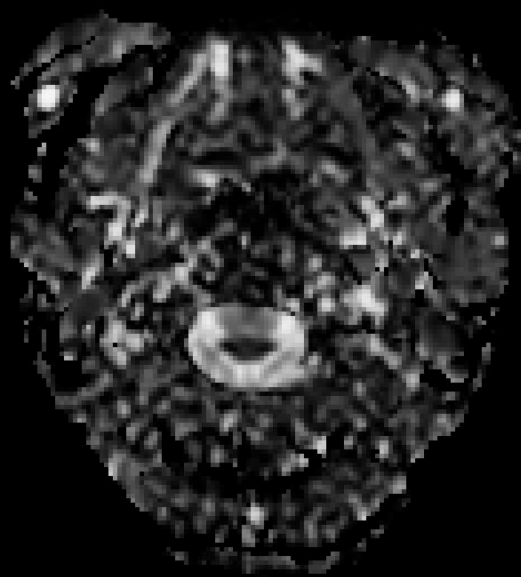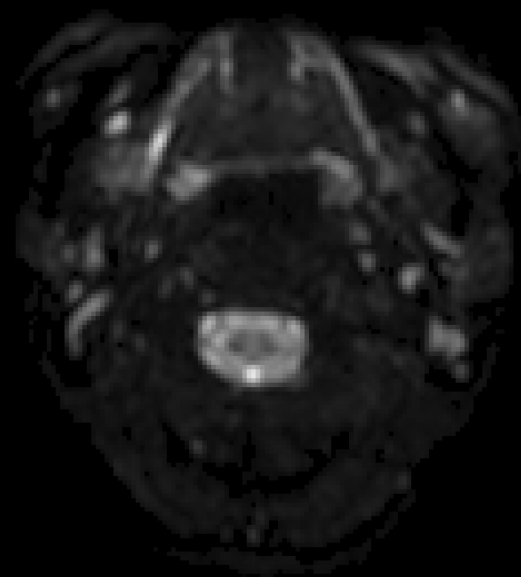

# Network instance 41

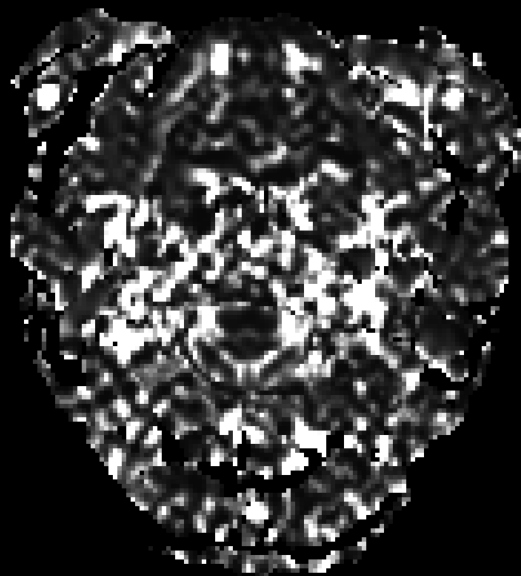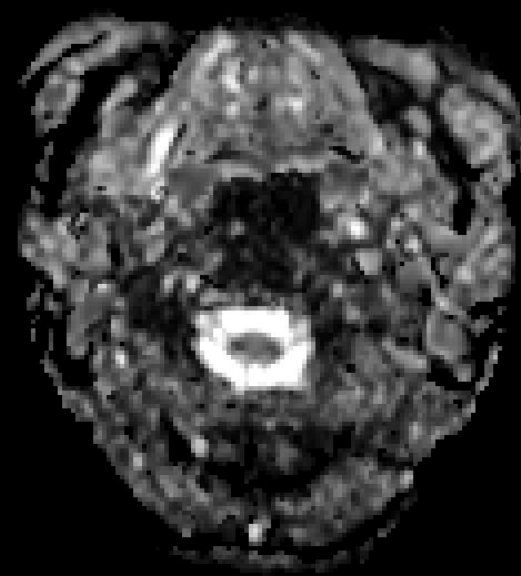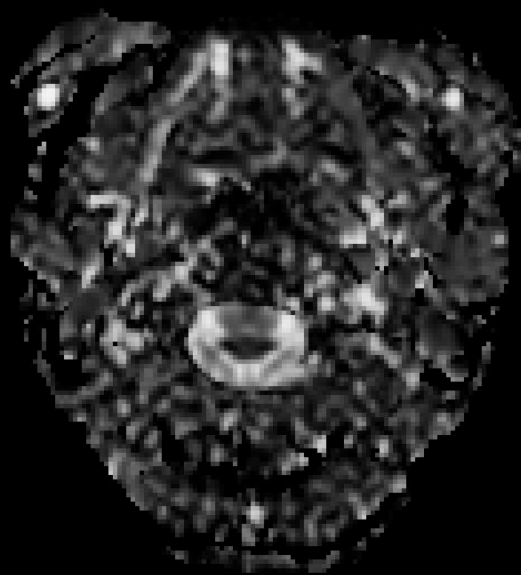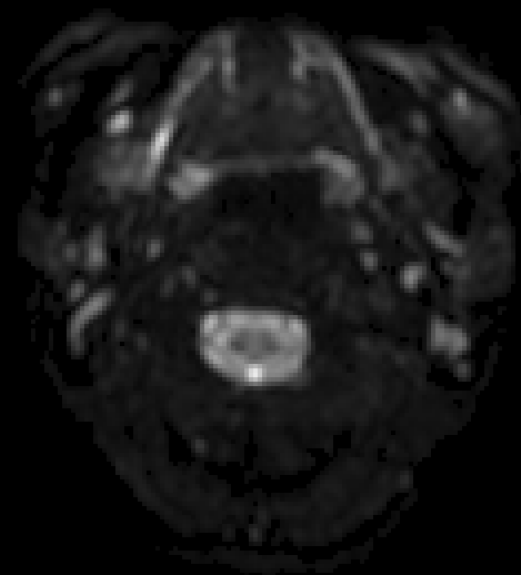

# Network instance 42

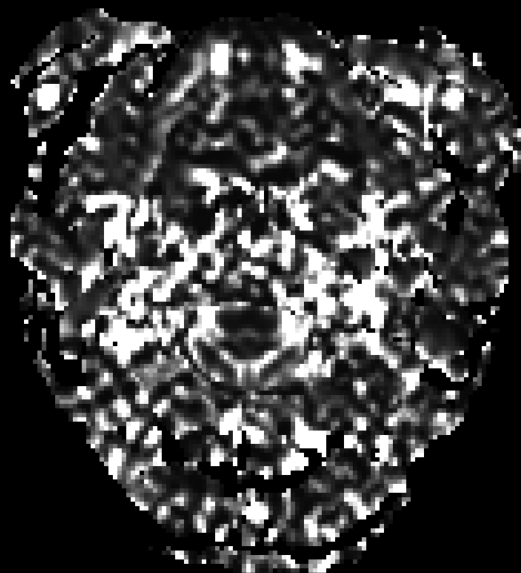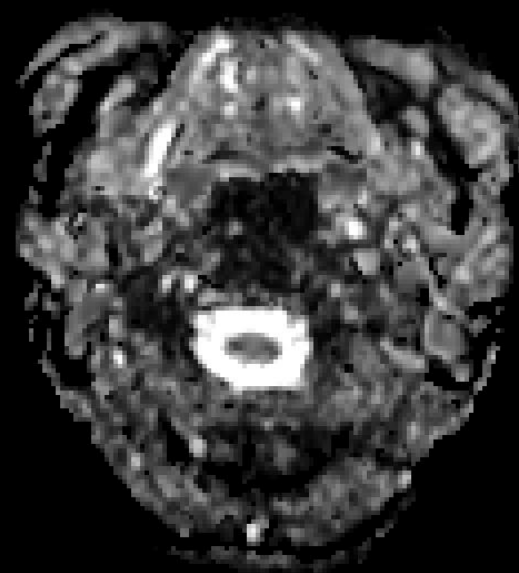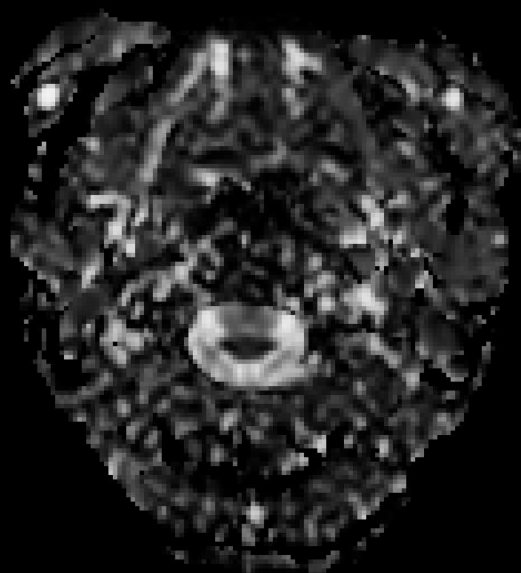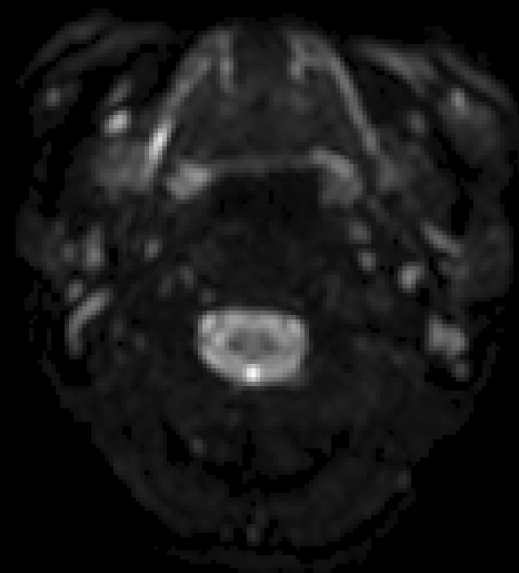

Network instance 43

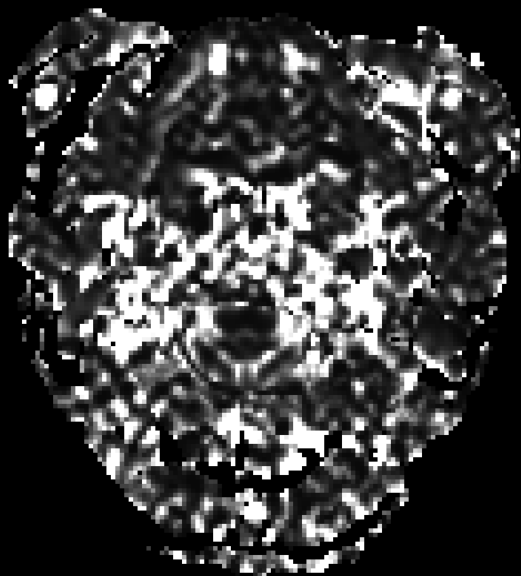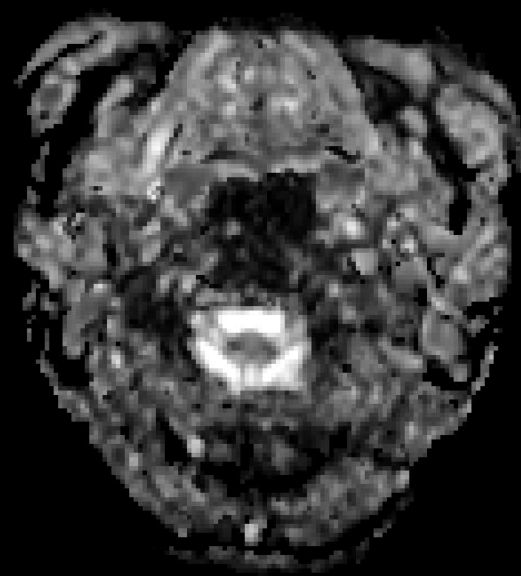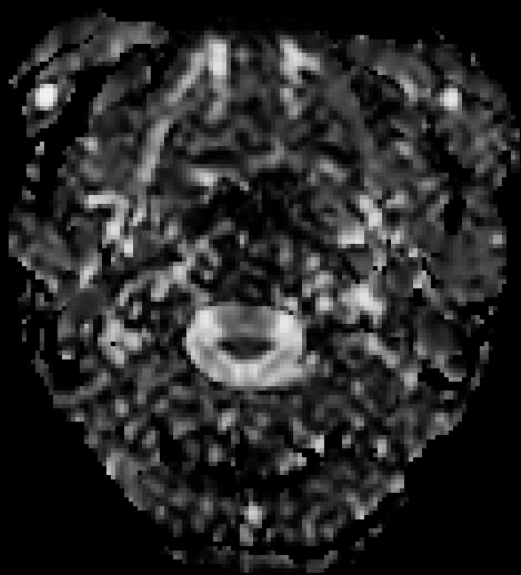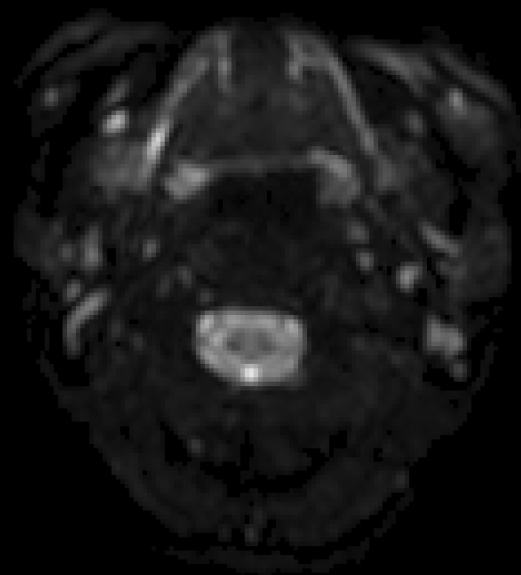

# Network instance 44

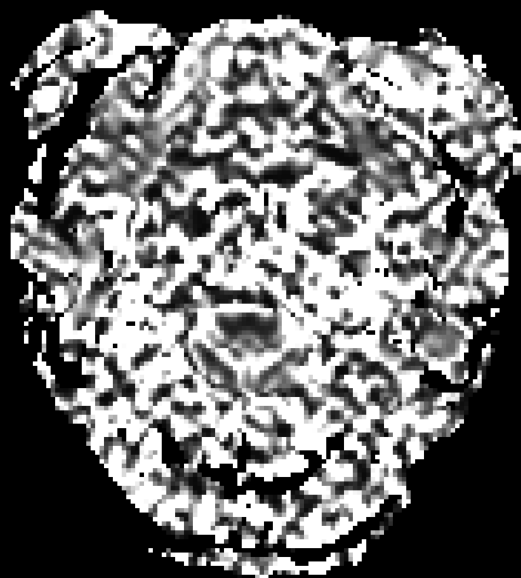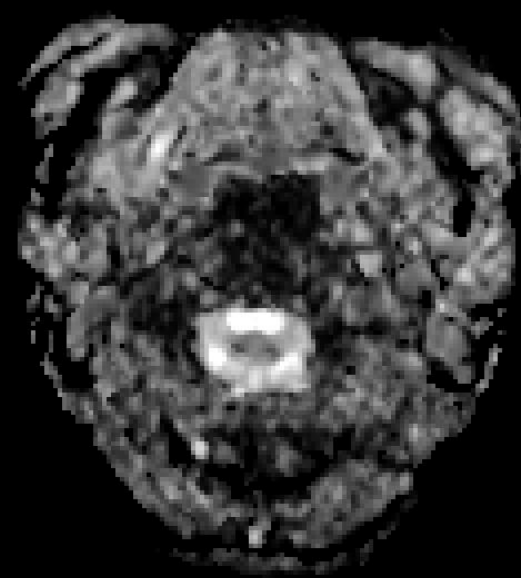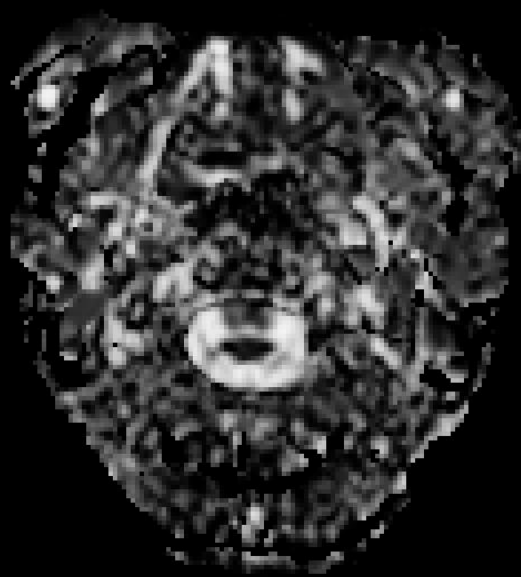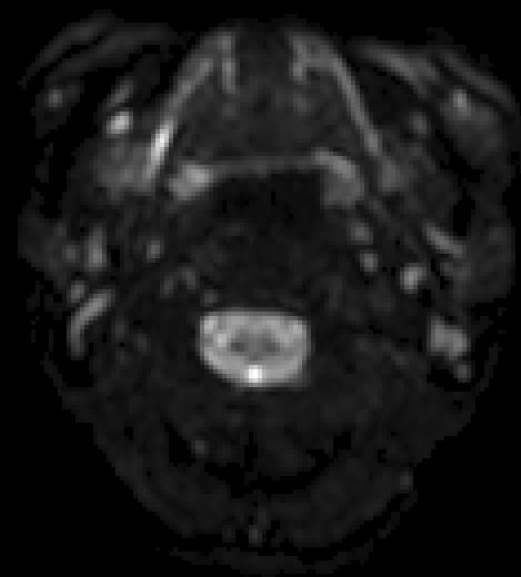

# Network instance 45

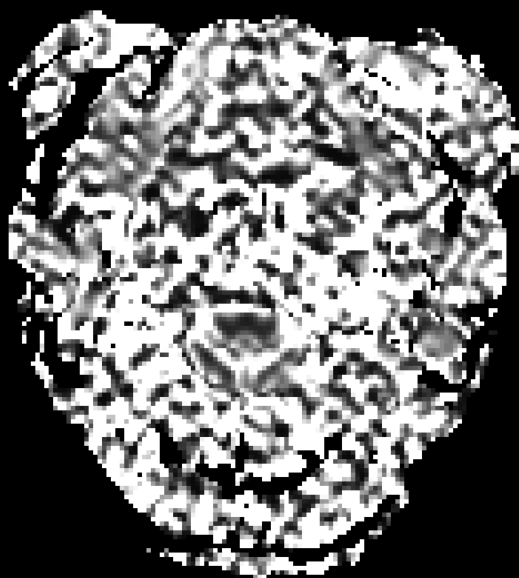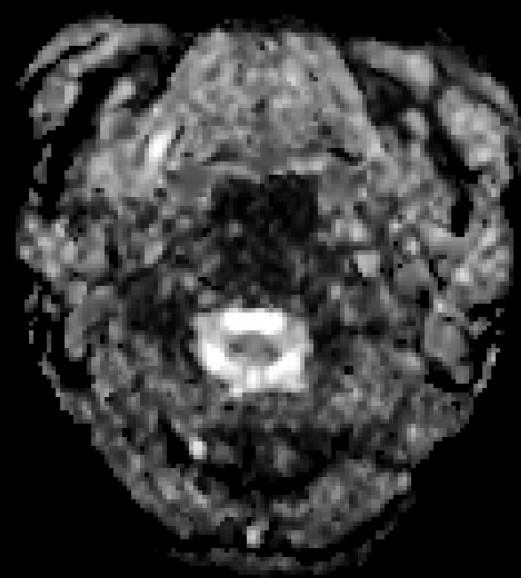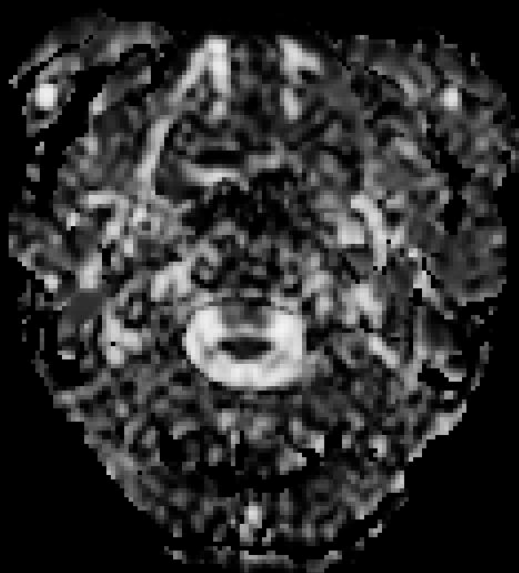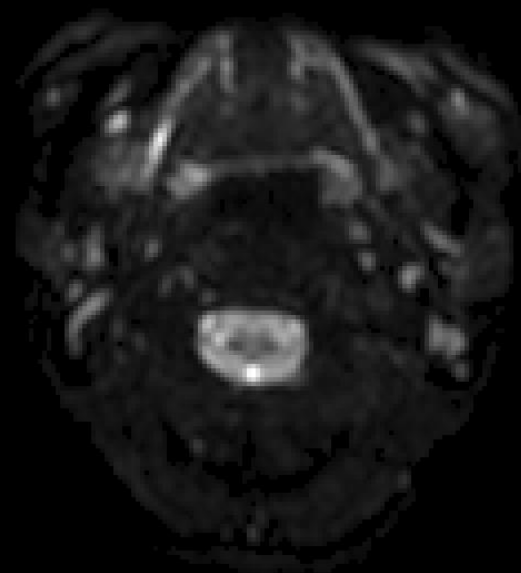

# Network instance 46

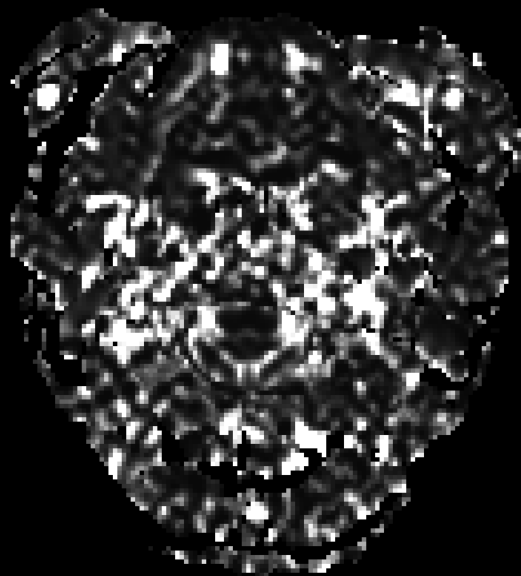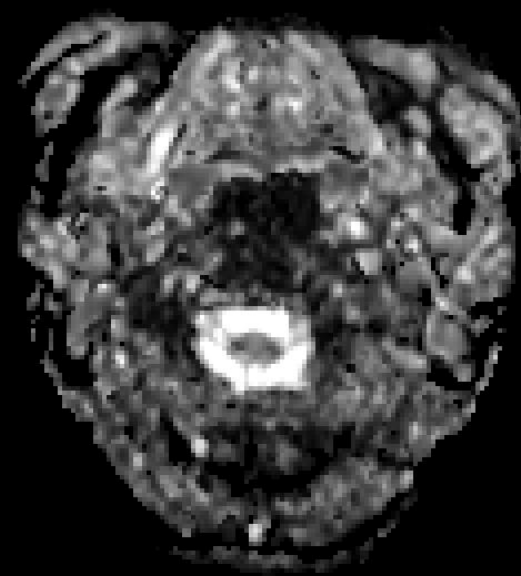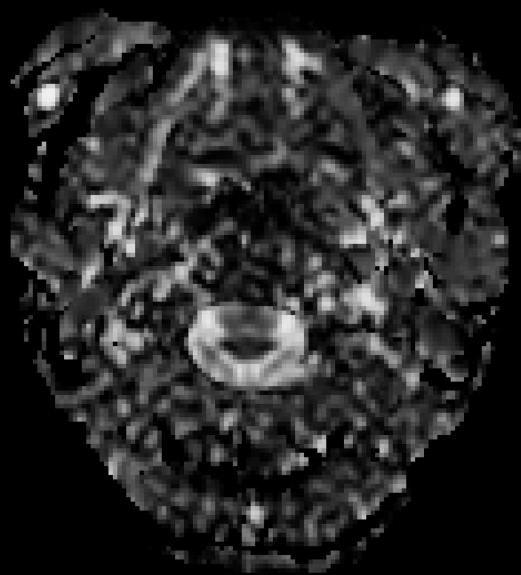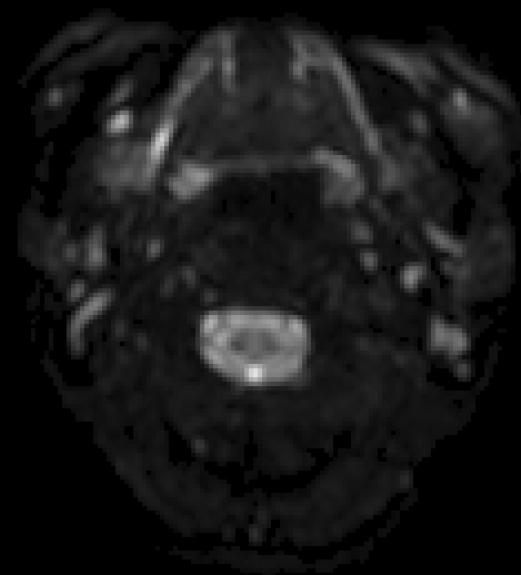



# Network instance 47

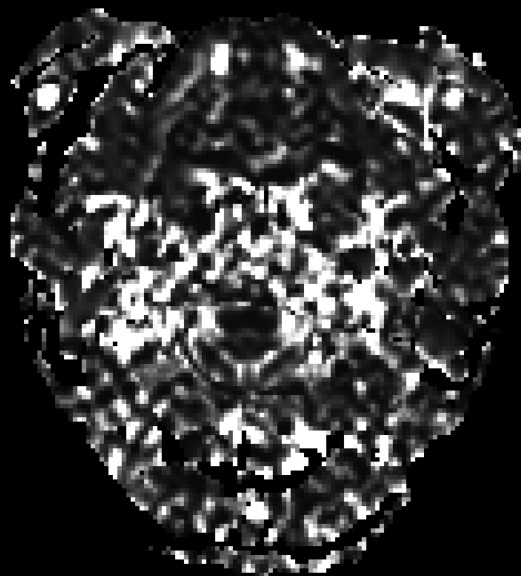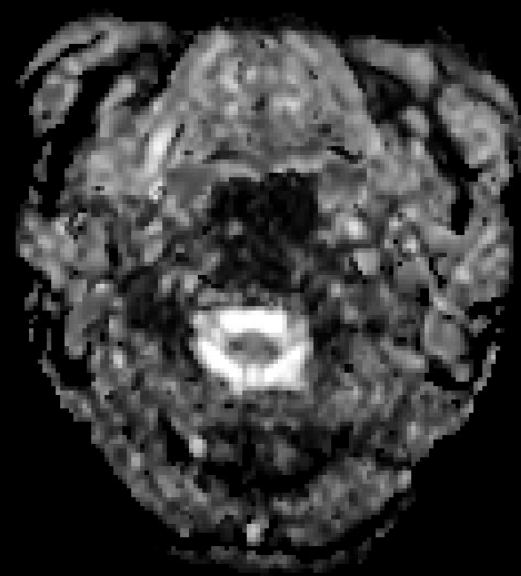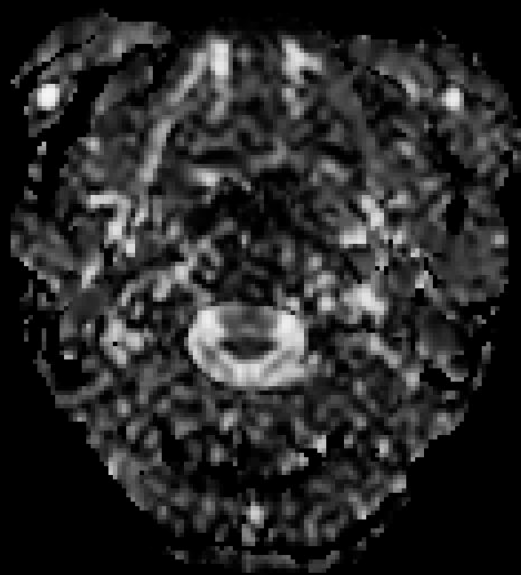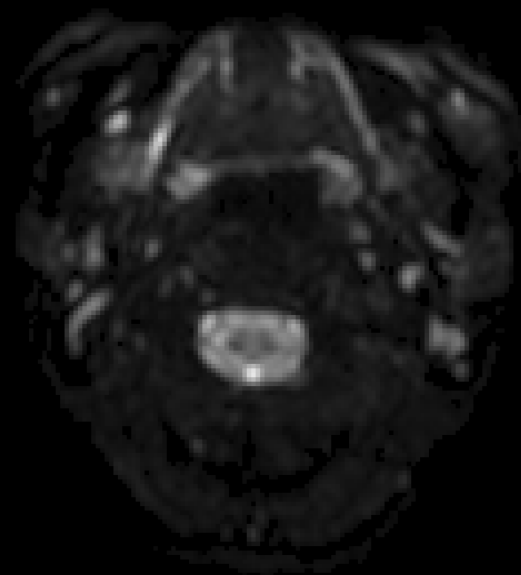

# Network instance 48

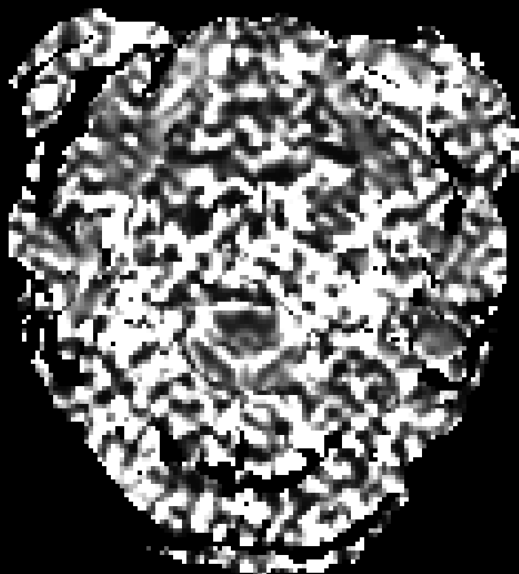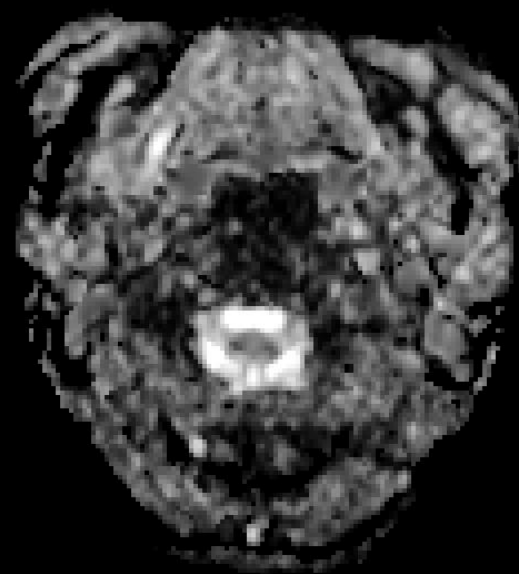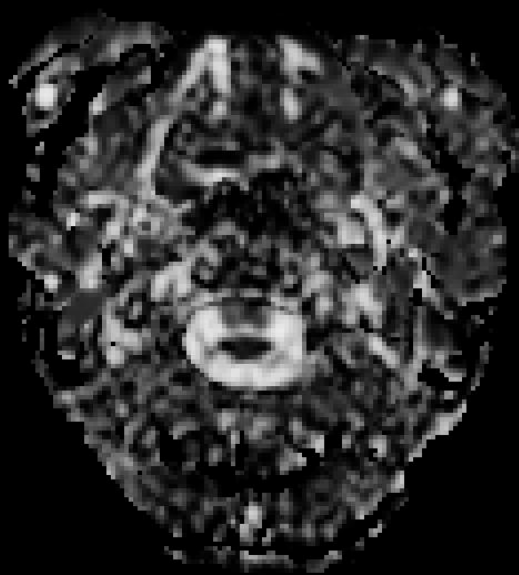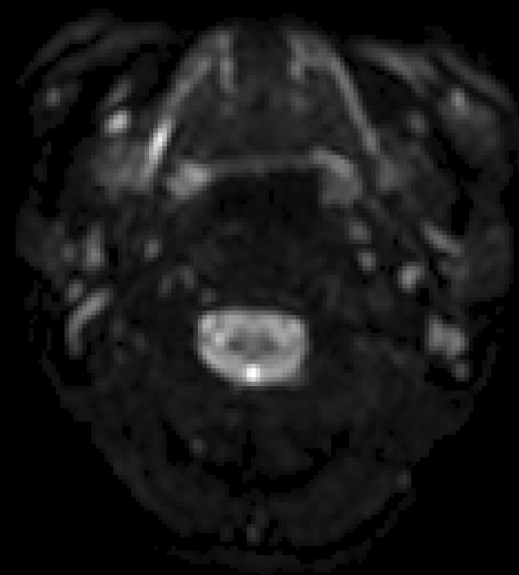

# Network instance 49

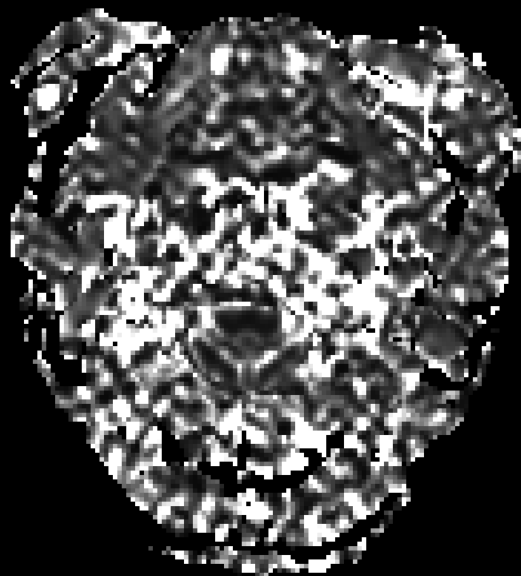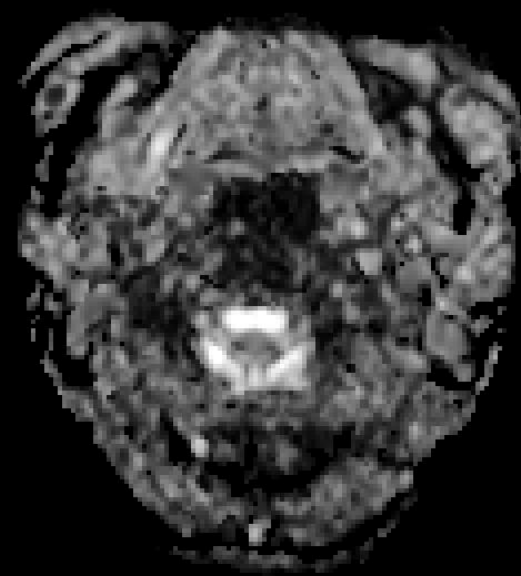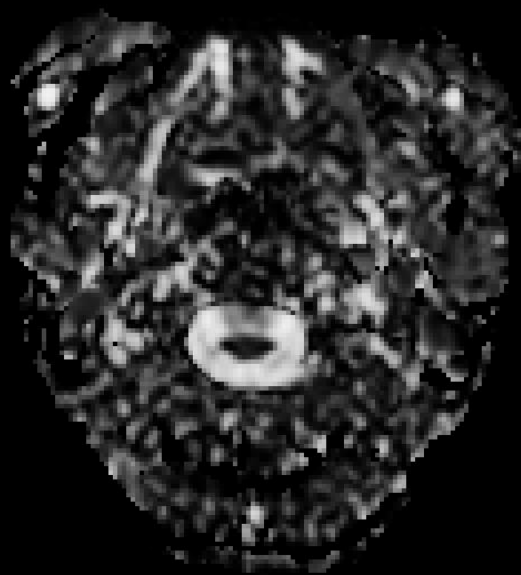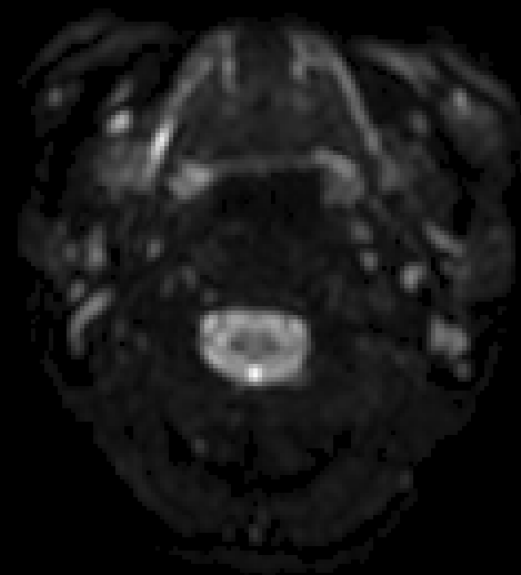

# Network instance 50

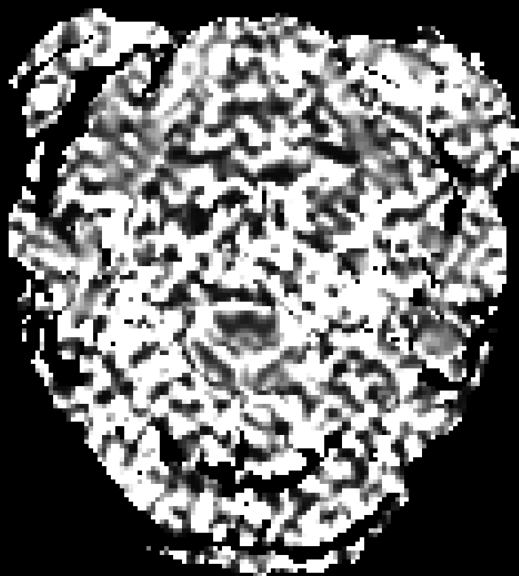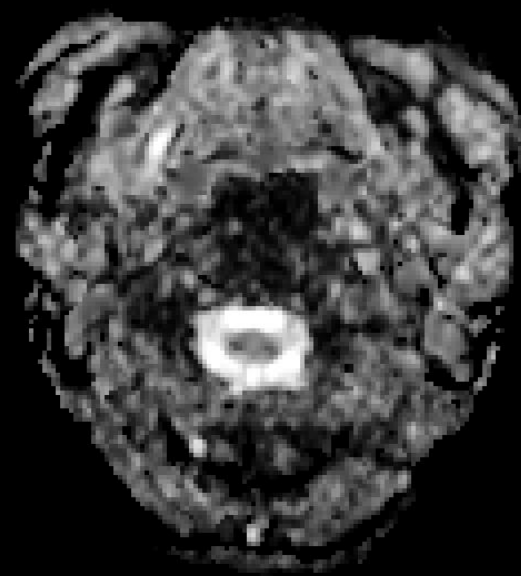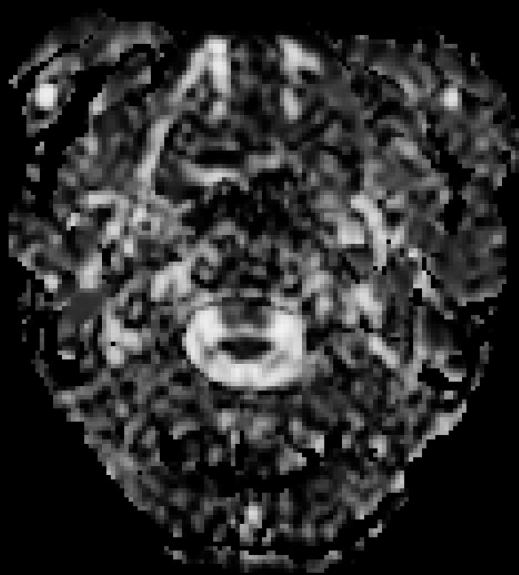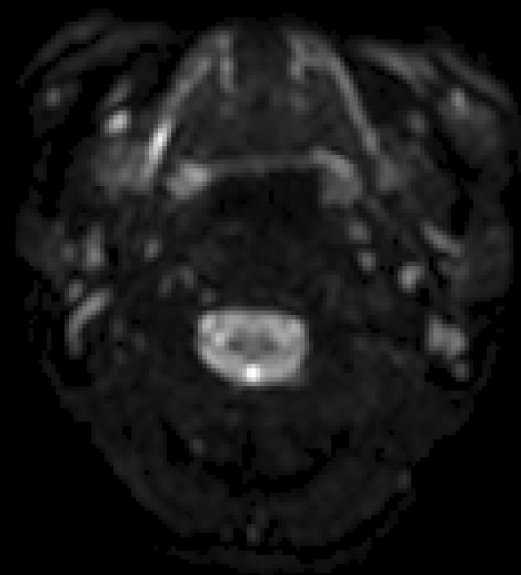

# Network instance 51

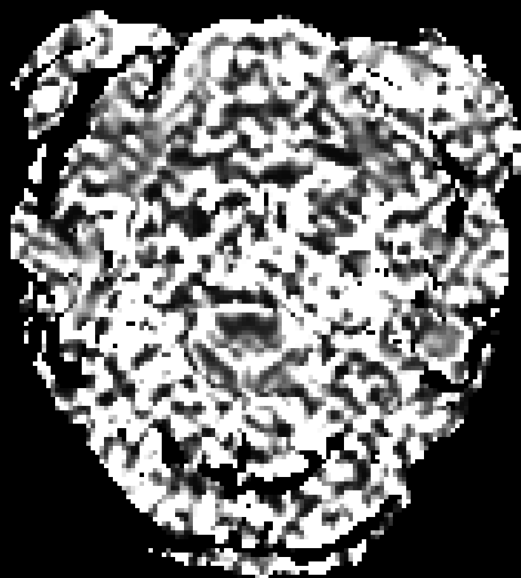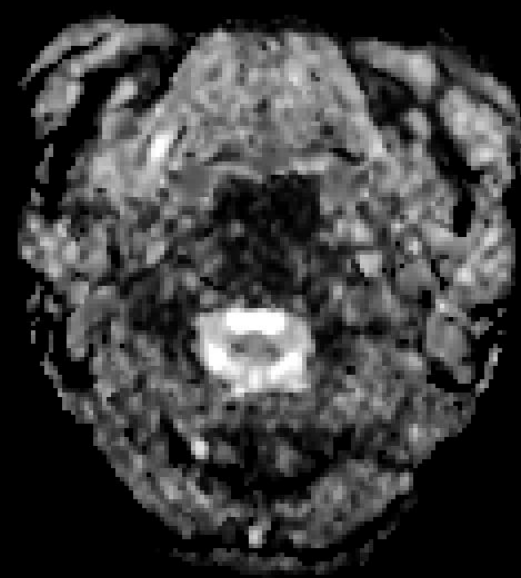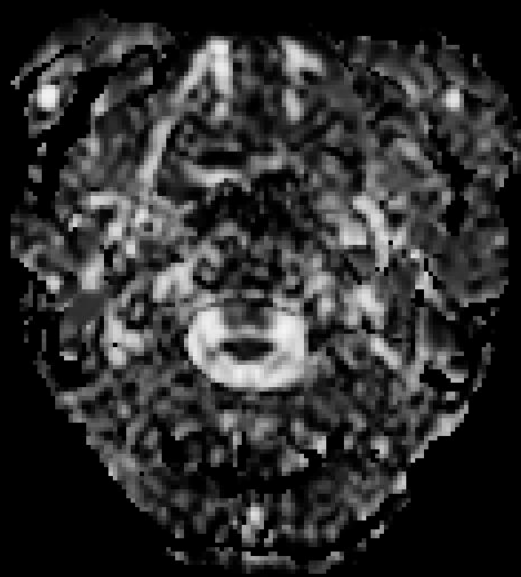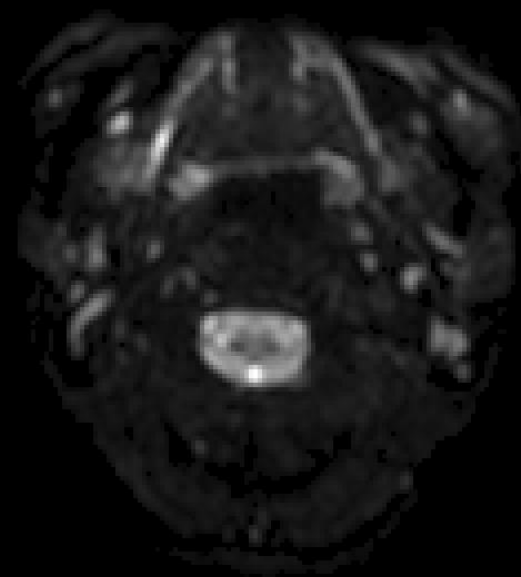

# Network instance 52

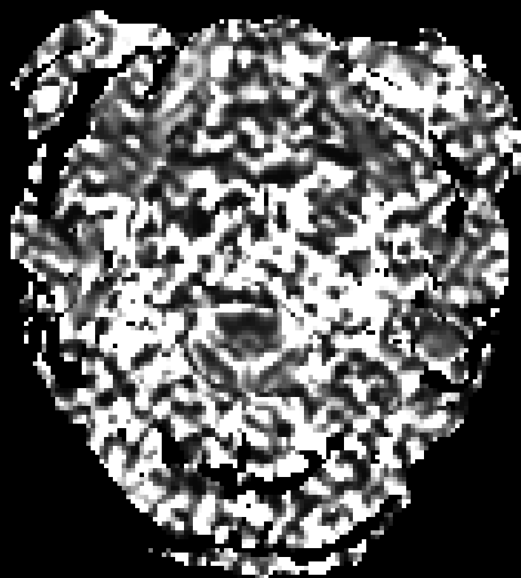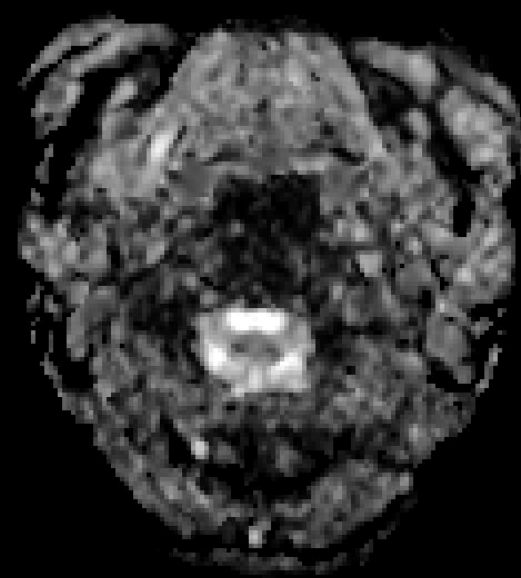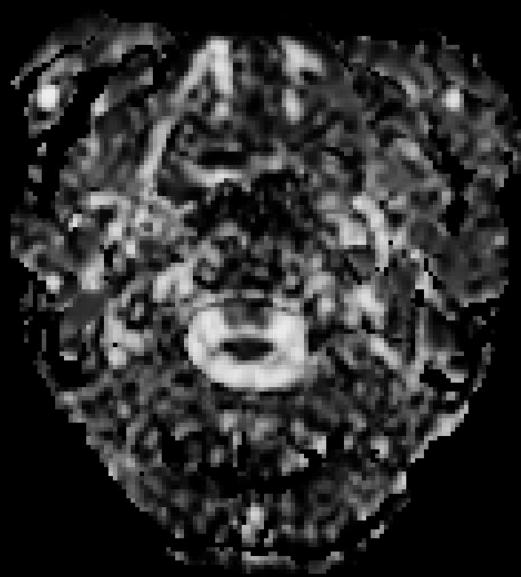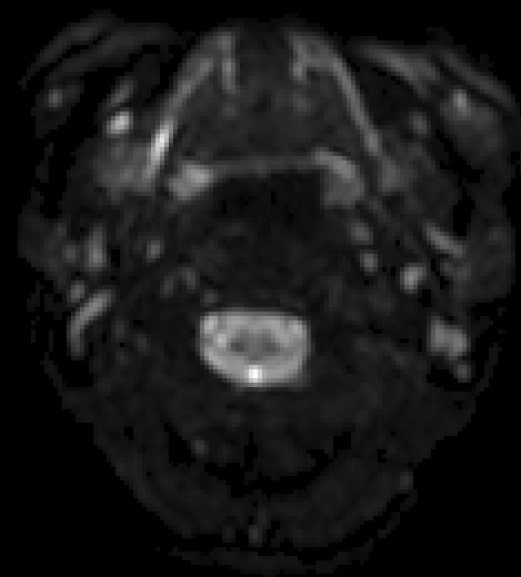

# Network instance 53

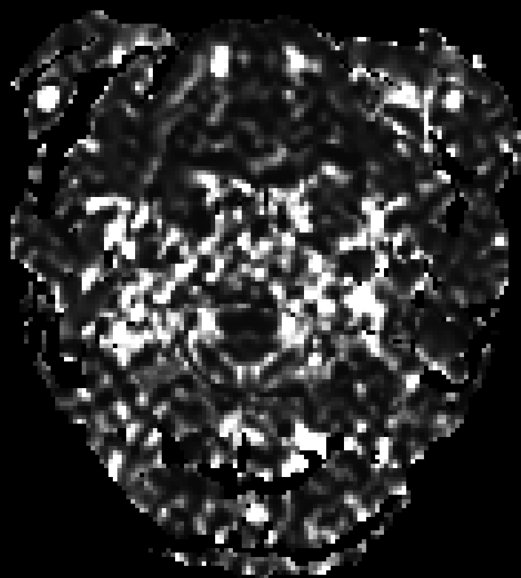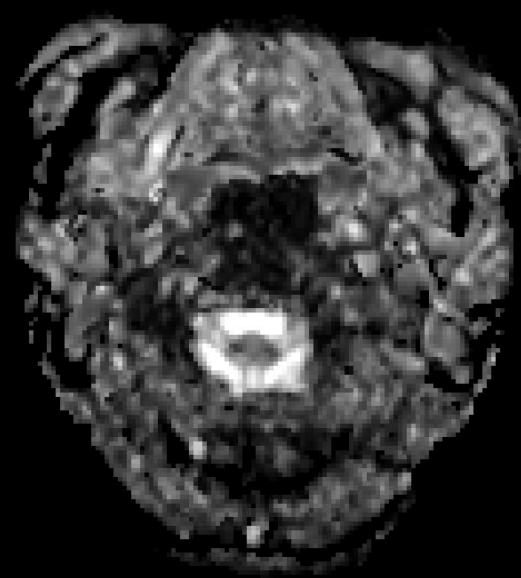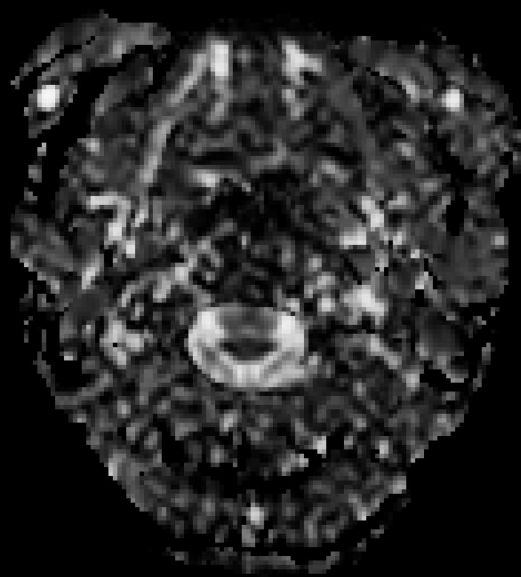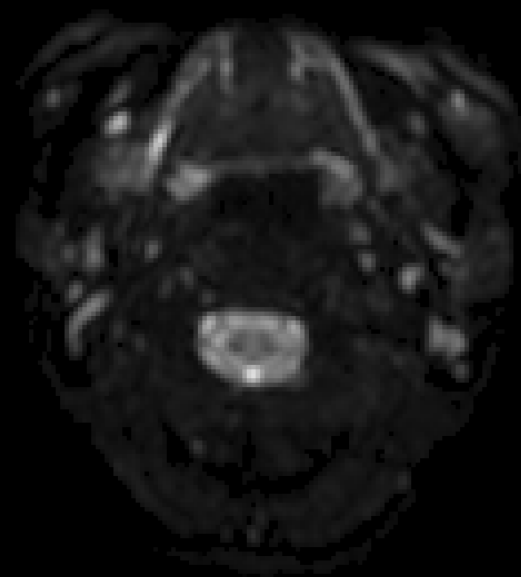

# Network instance 54

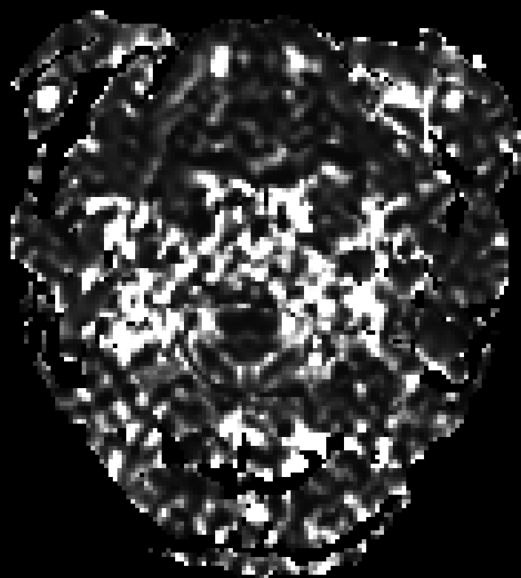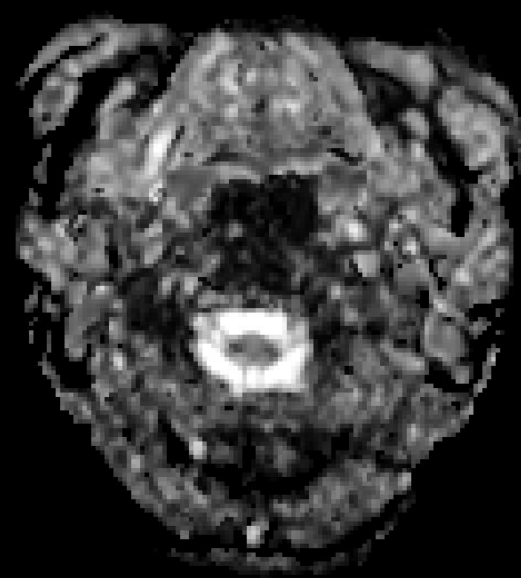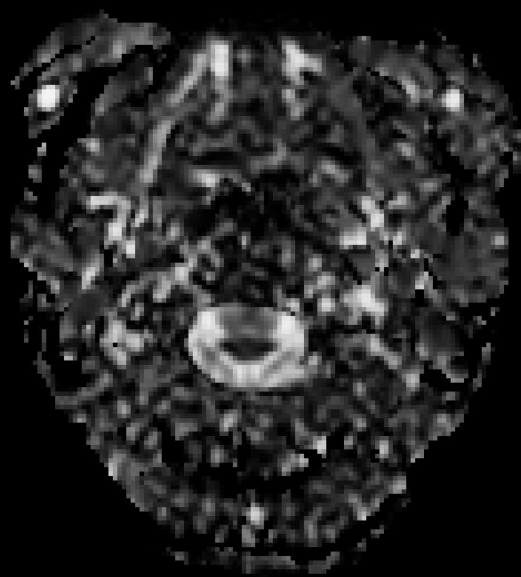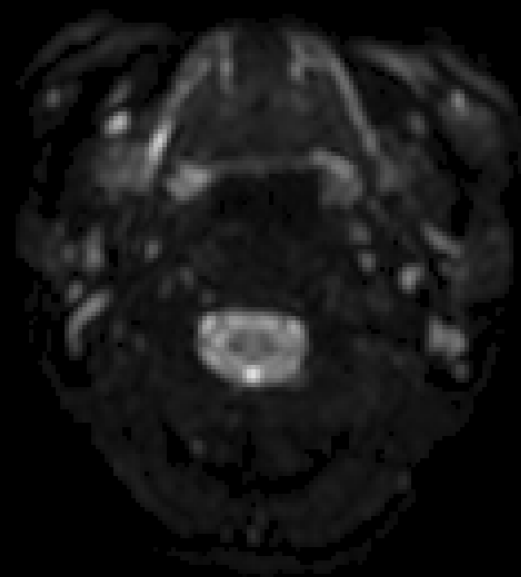



# Network instance 55

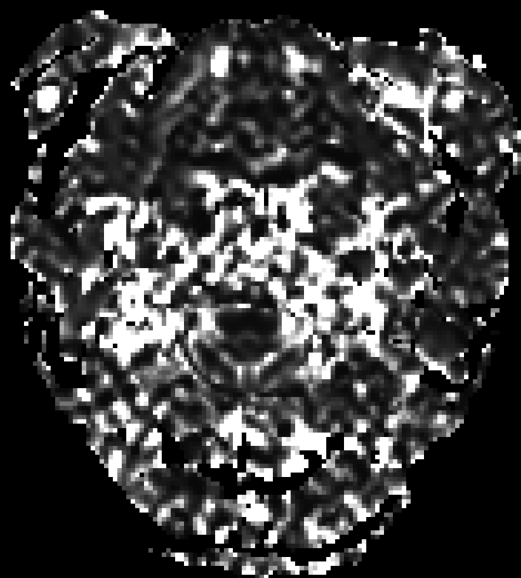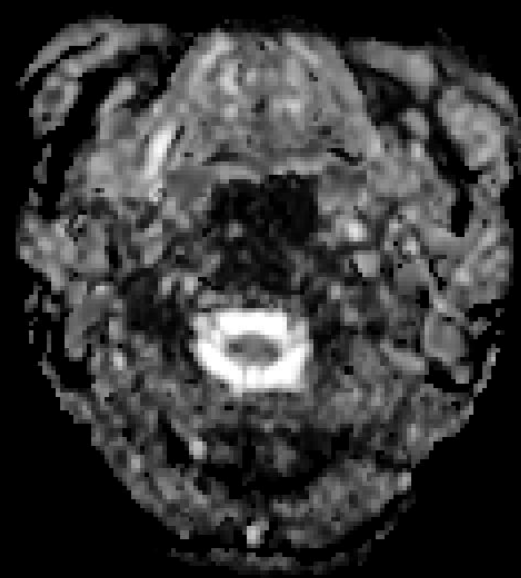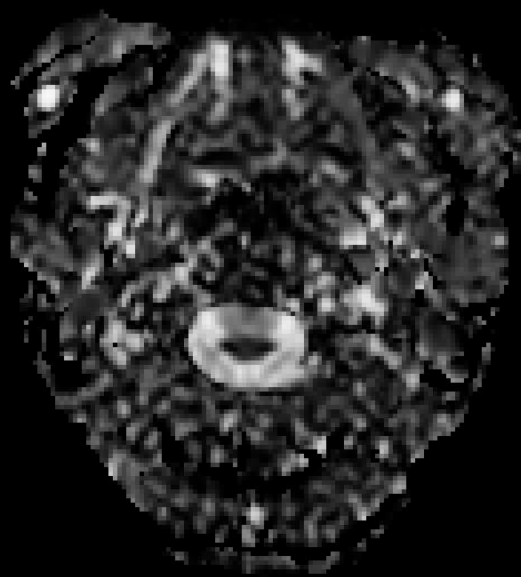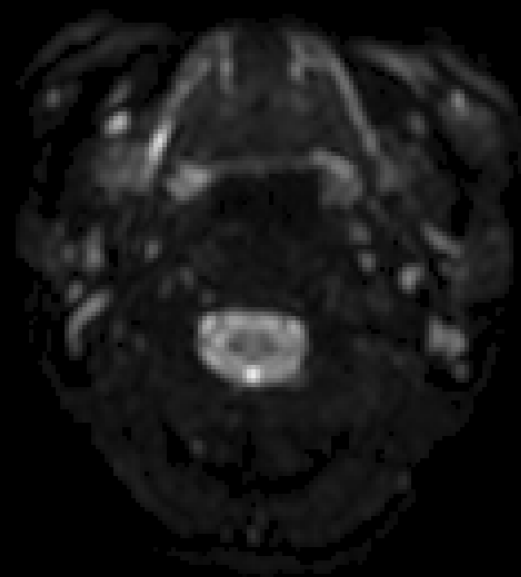

# Network instance 56

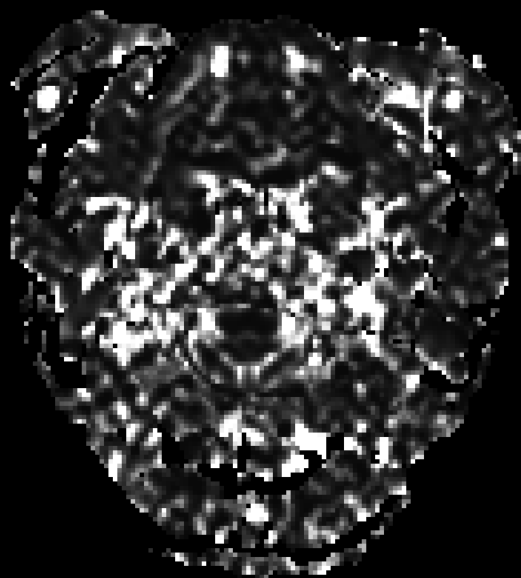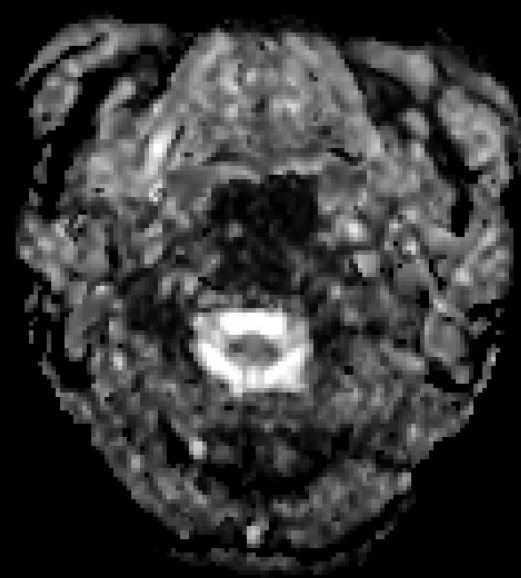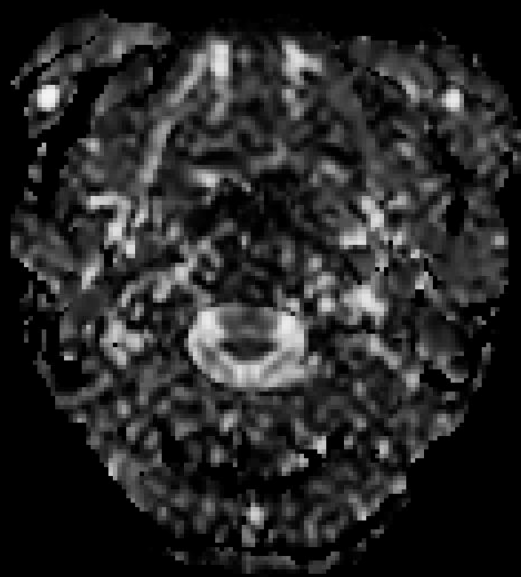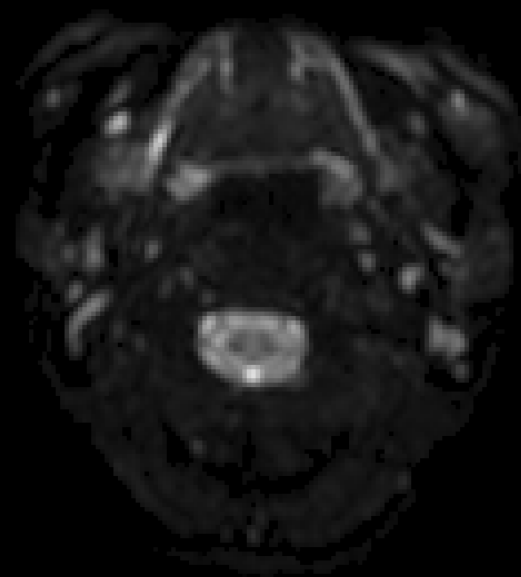

# Network instance 57

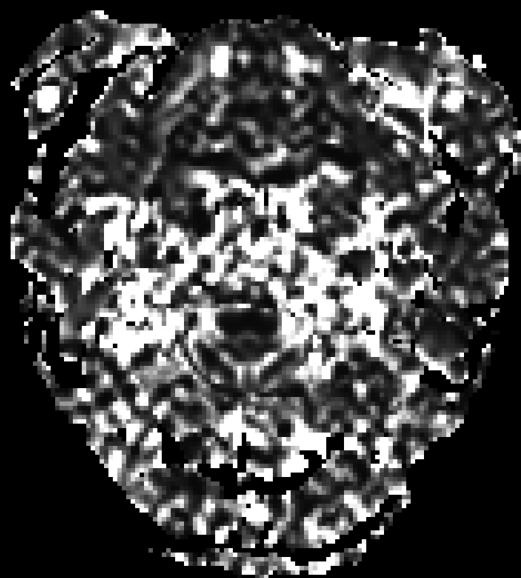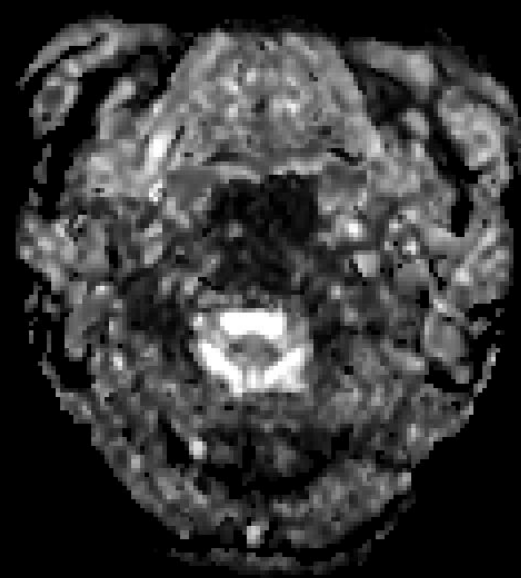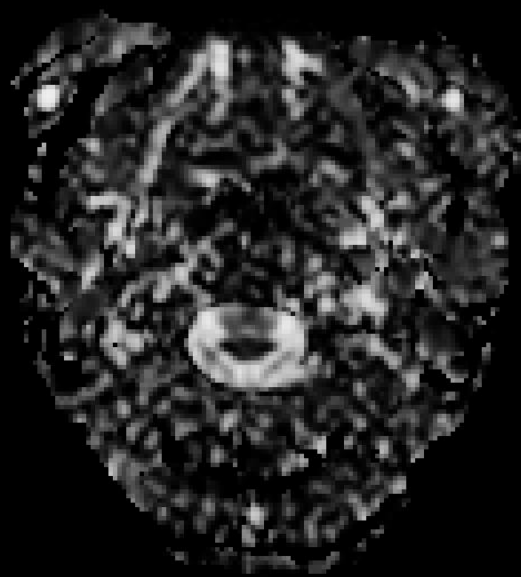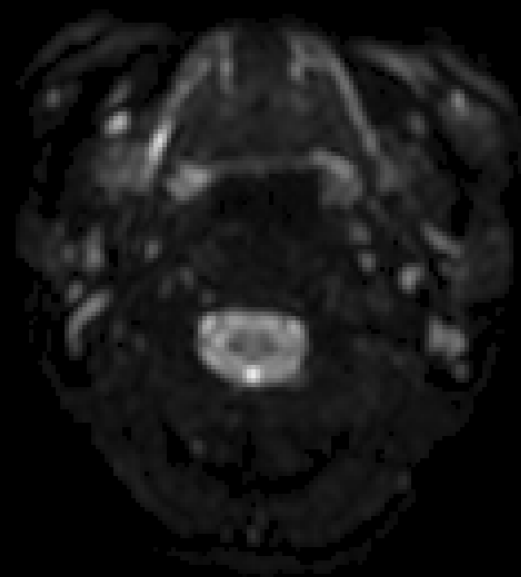

# Network instance 58

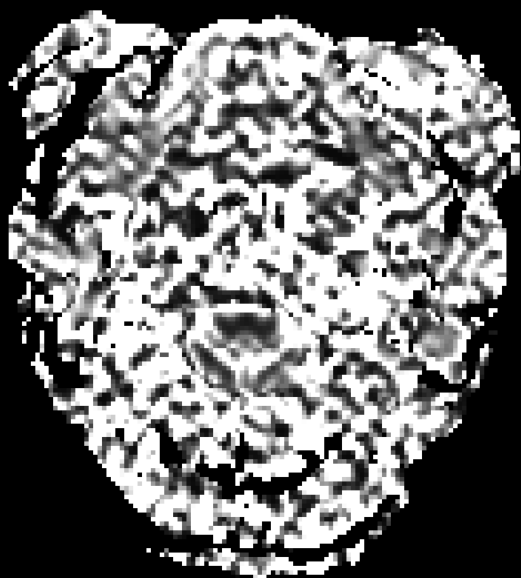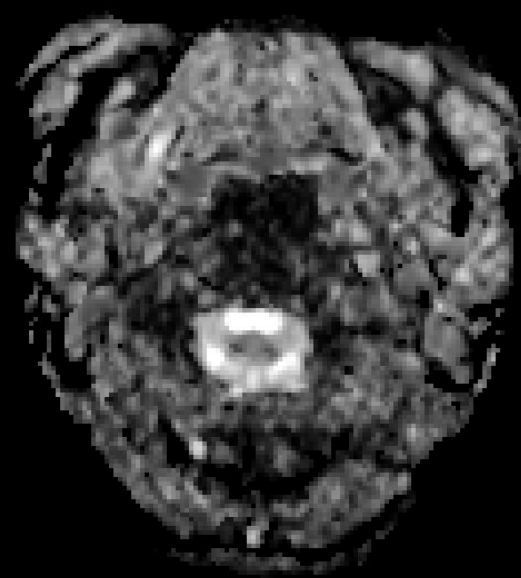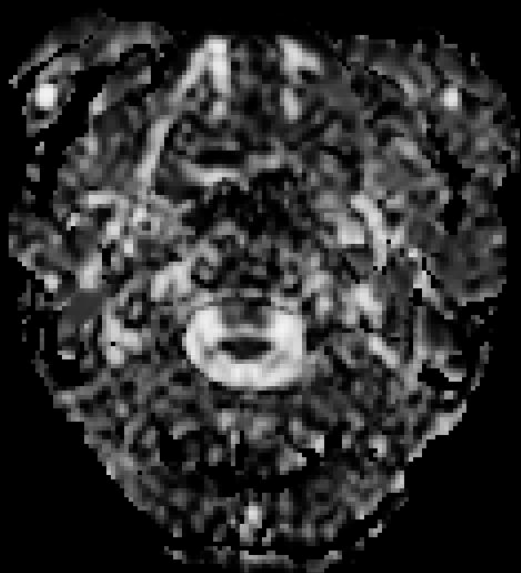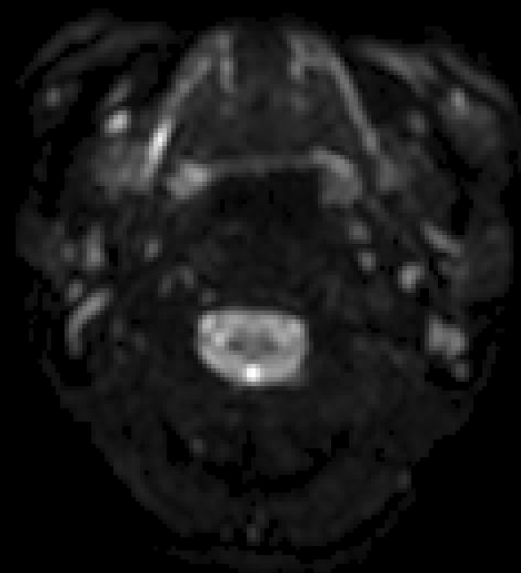

# Network instance 59

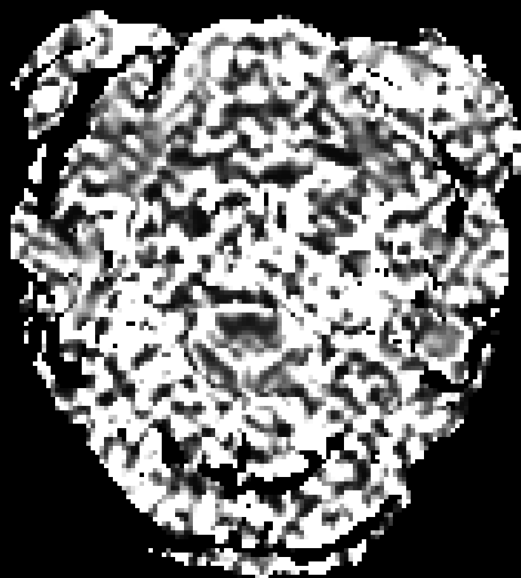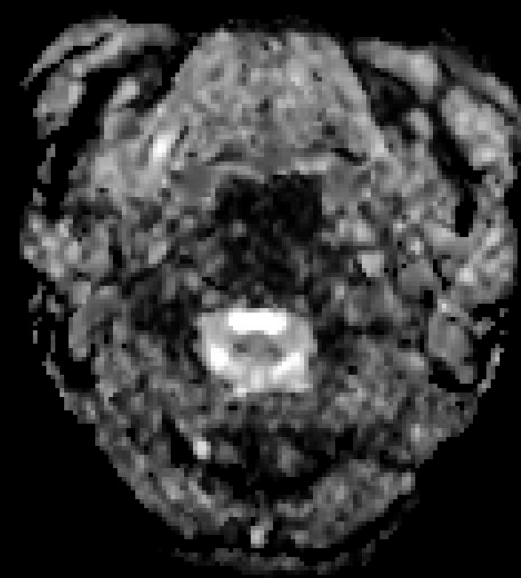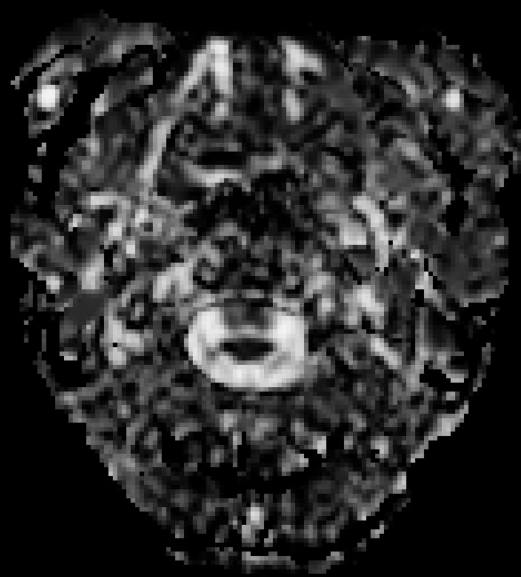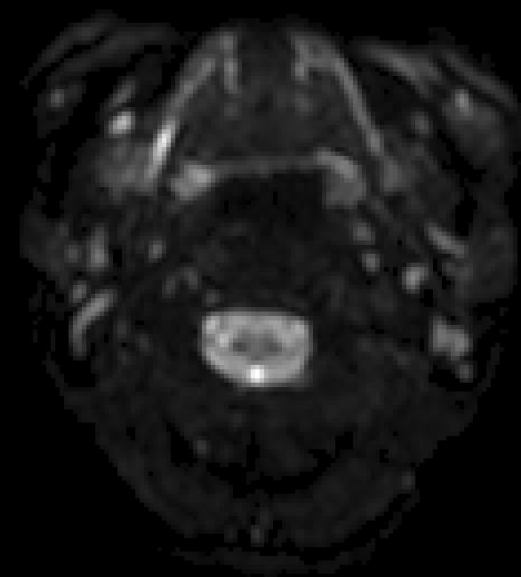

# Network instance 60

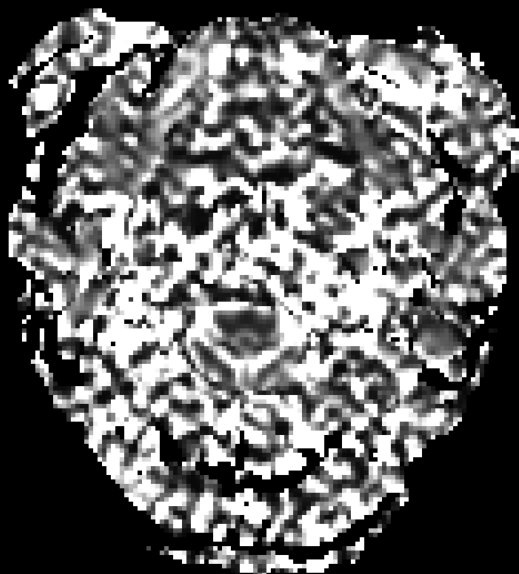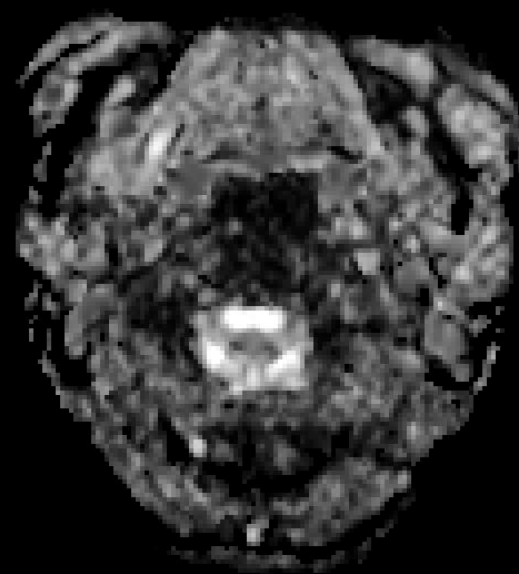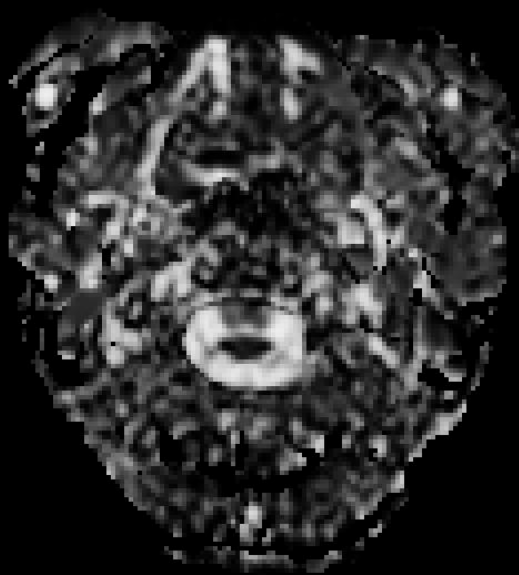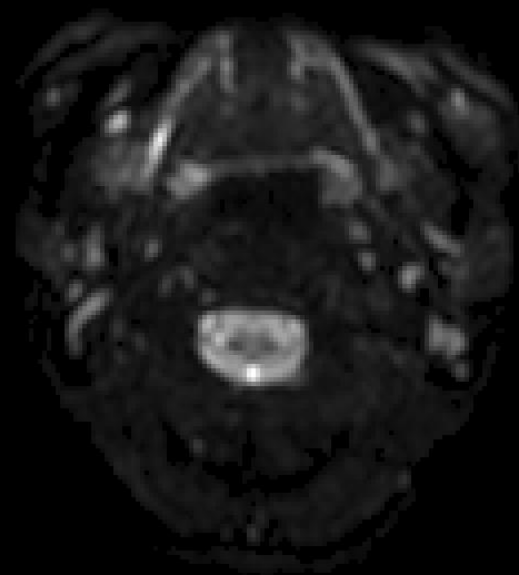

# Network instance 61

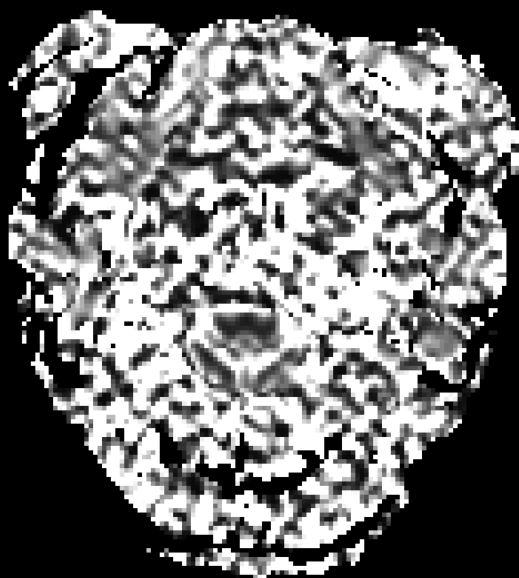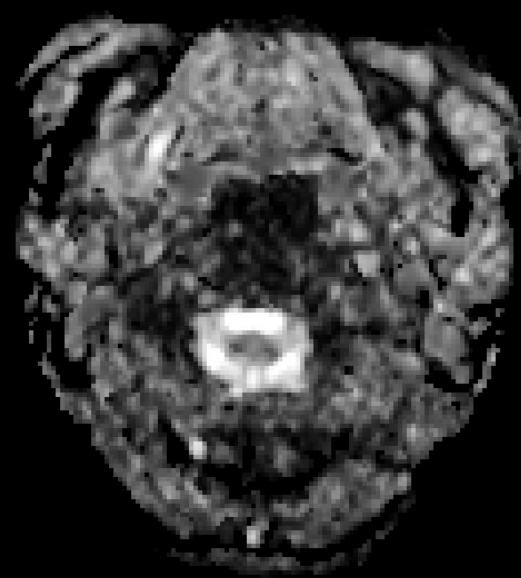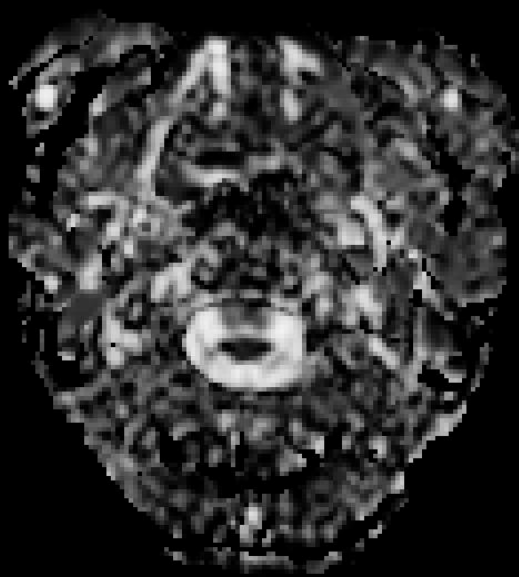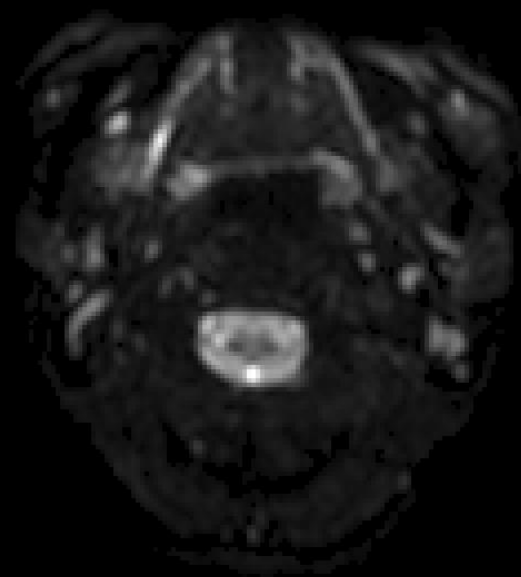

# Network instance 62

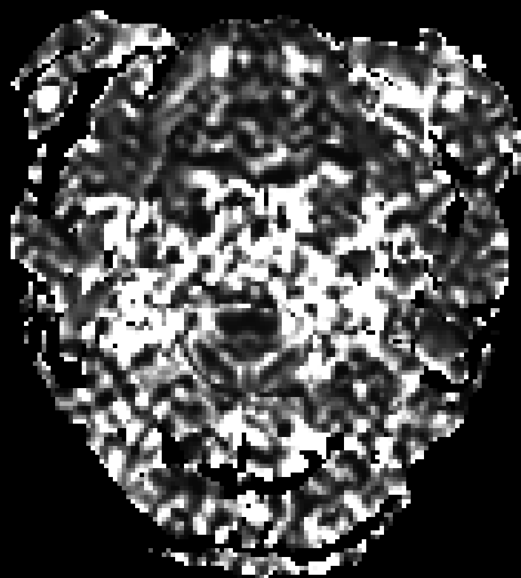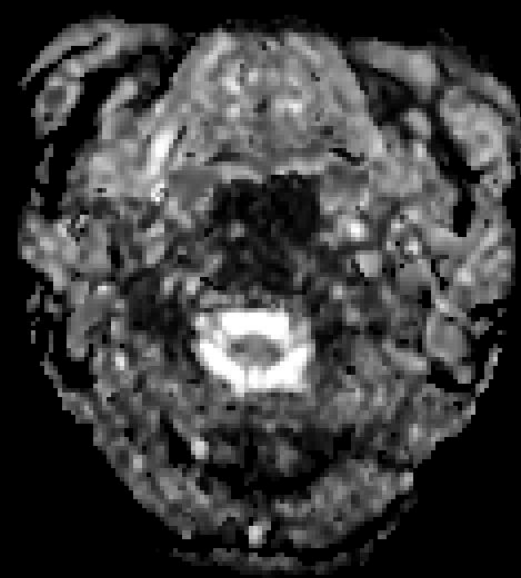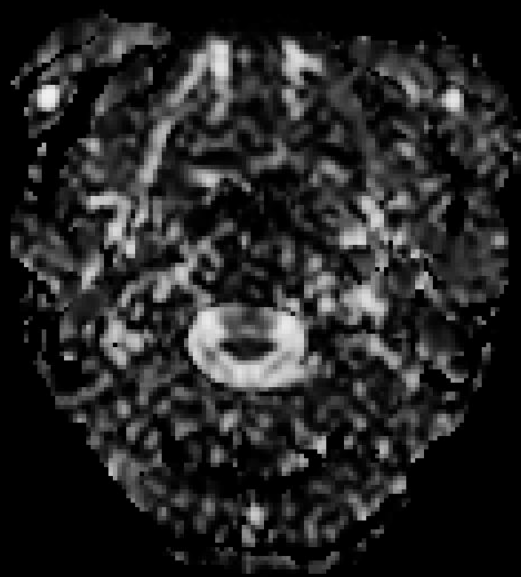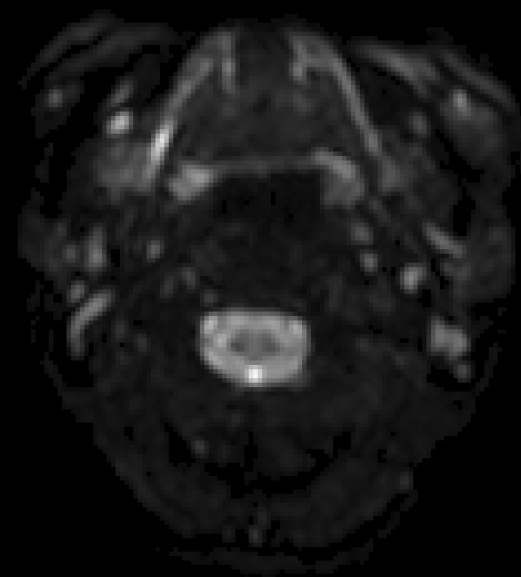



# Network instance 63

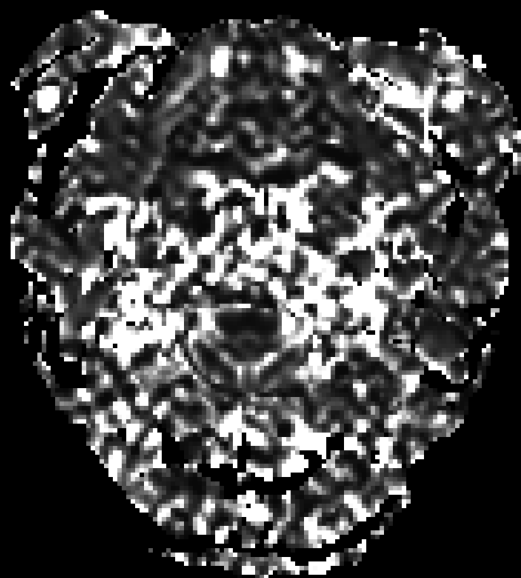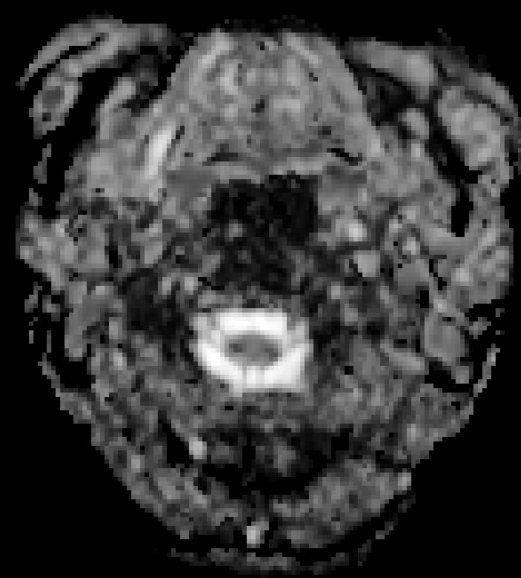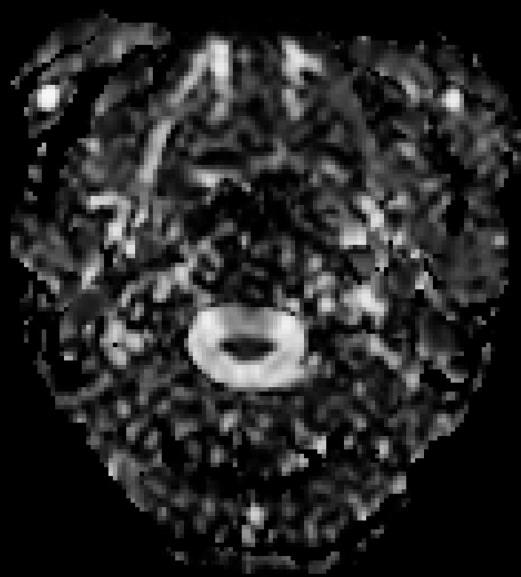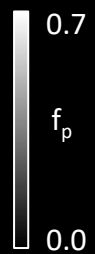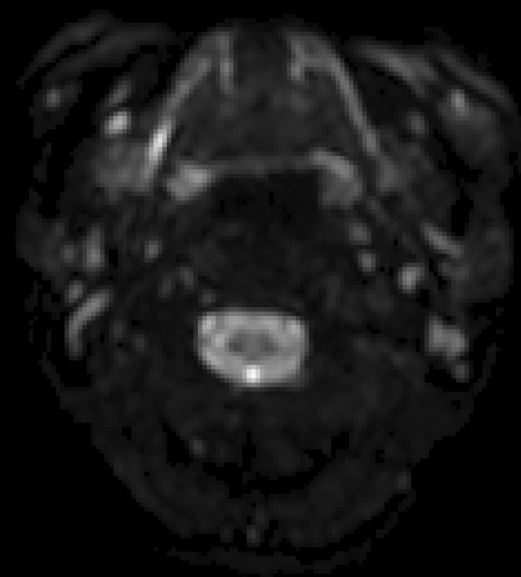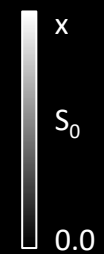

# Network instance 64

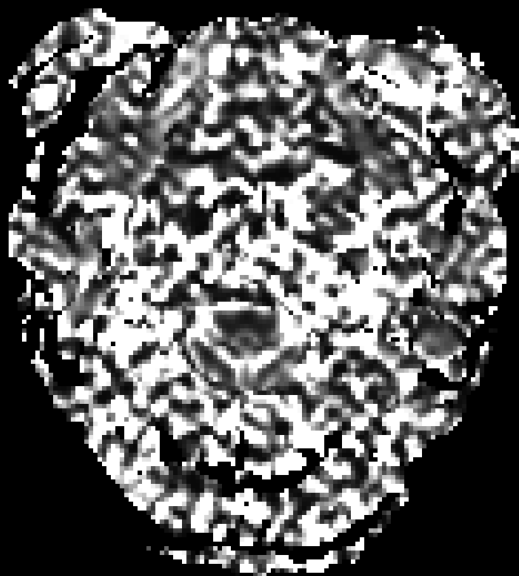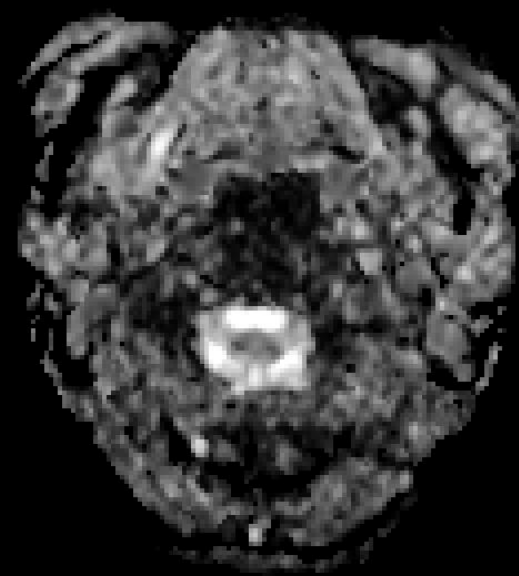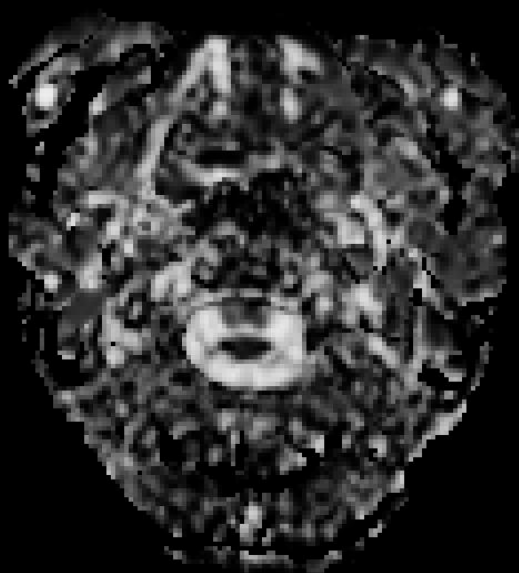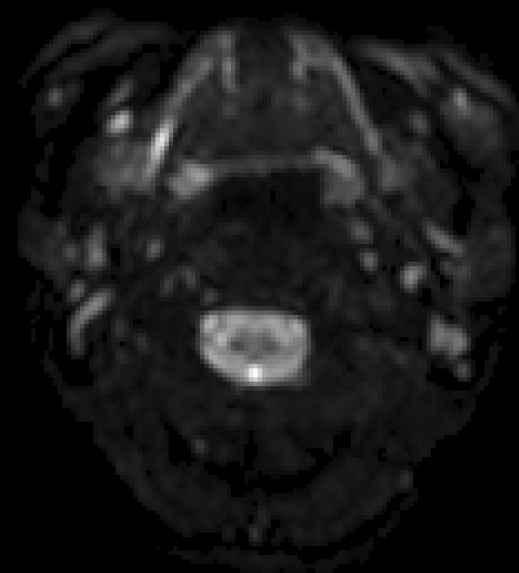

# Network instance 65

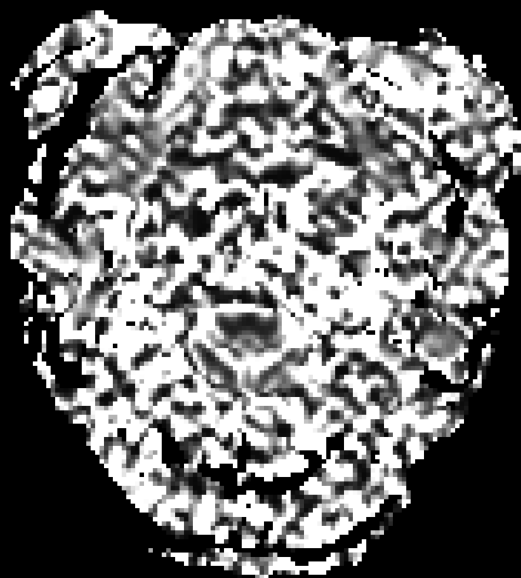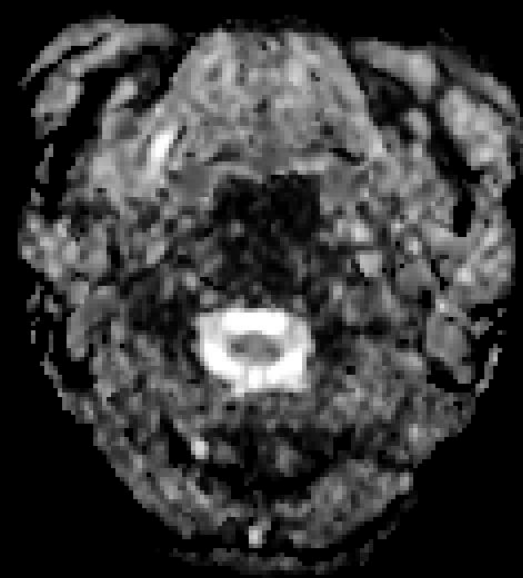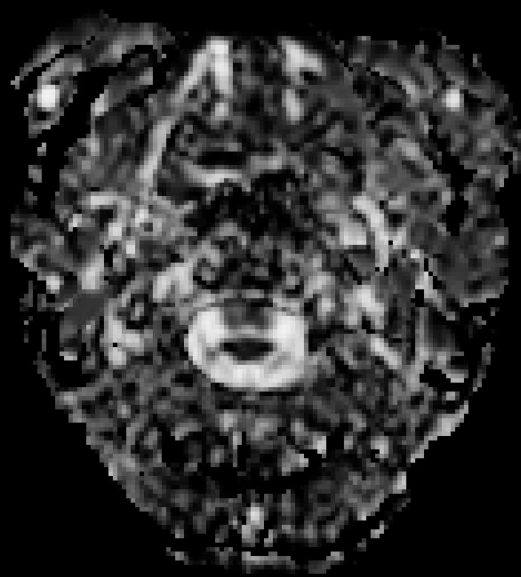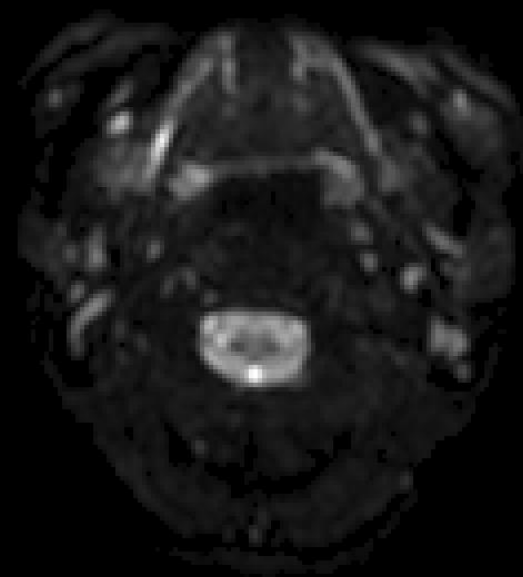

# Network instance 66

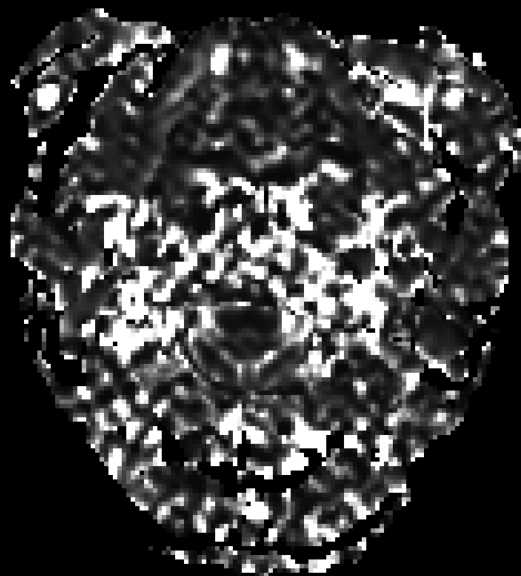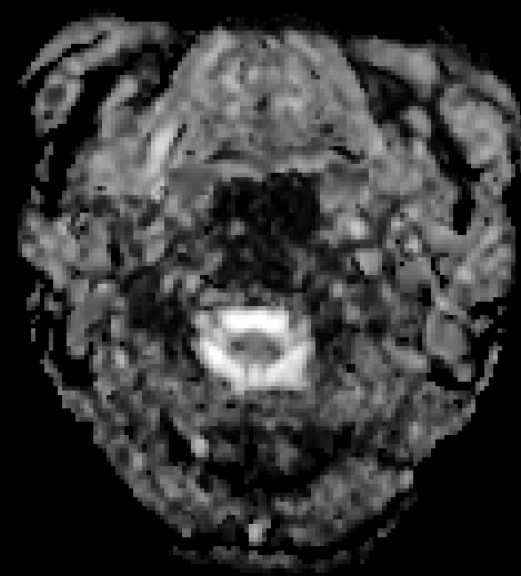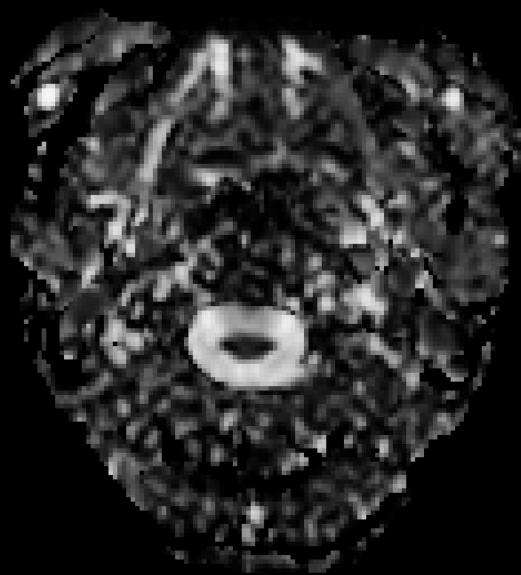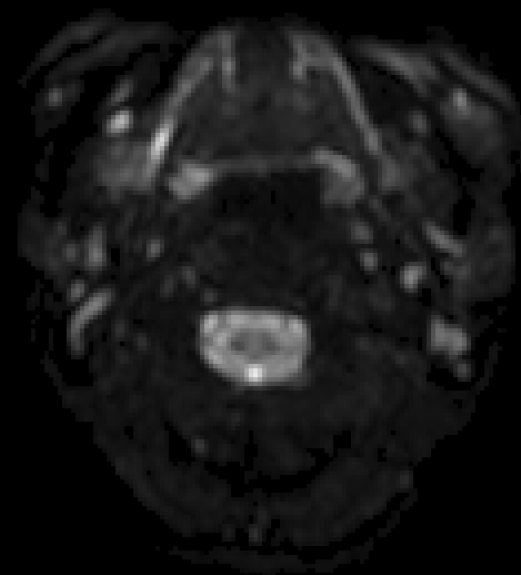

# Network instance 67

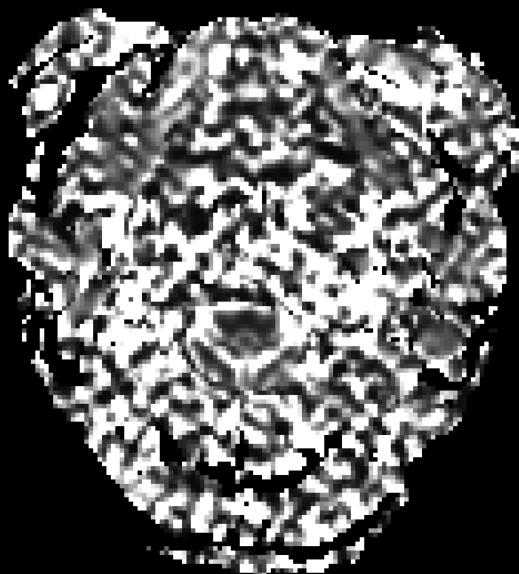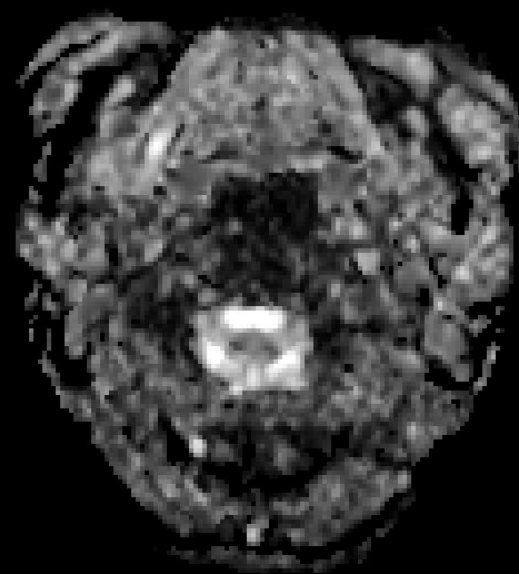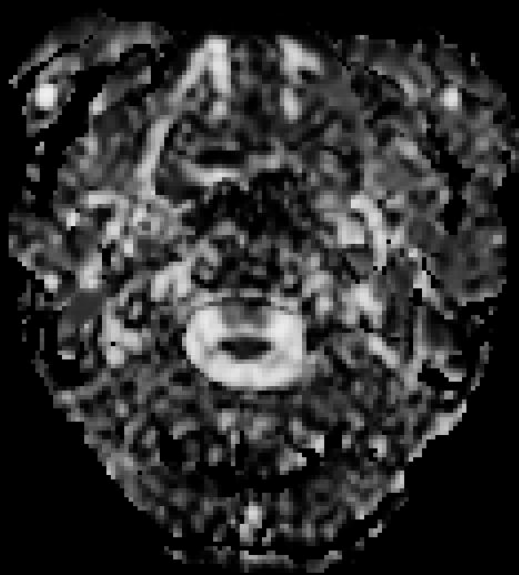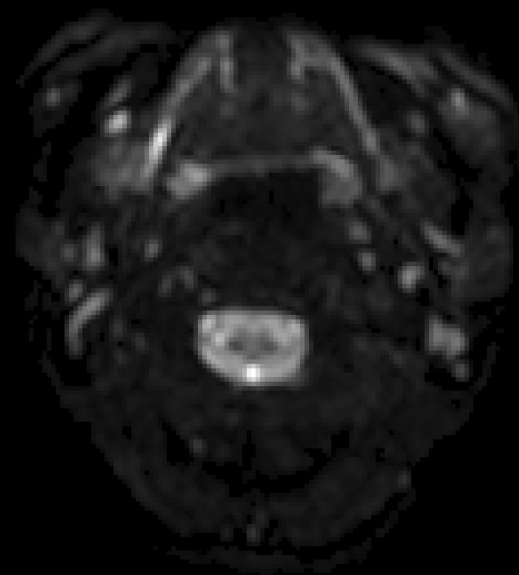

# Network instance 68

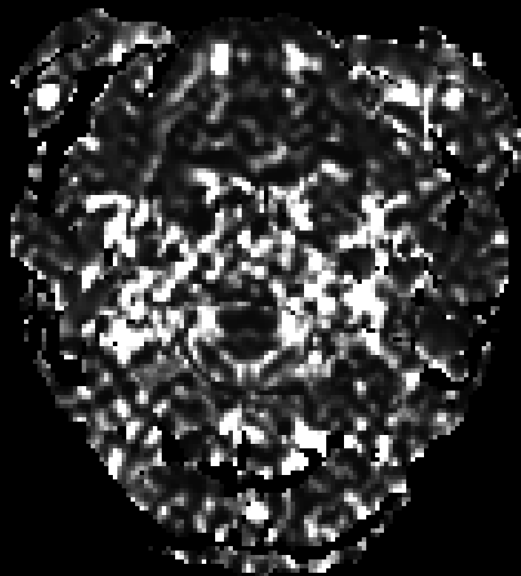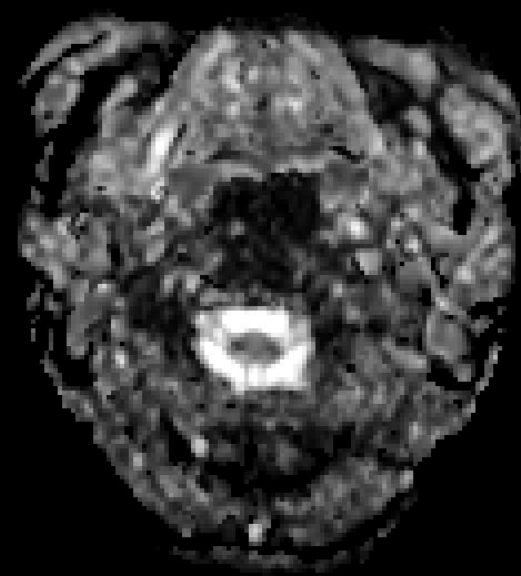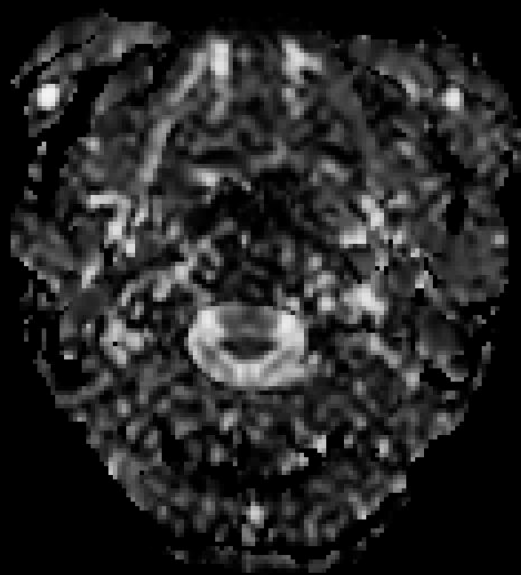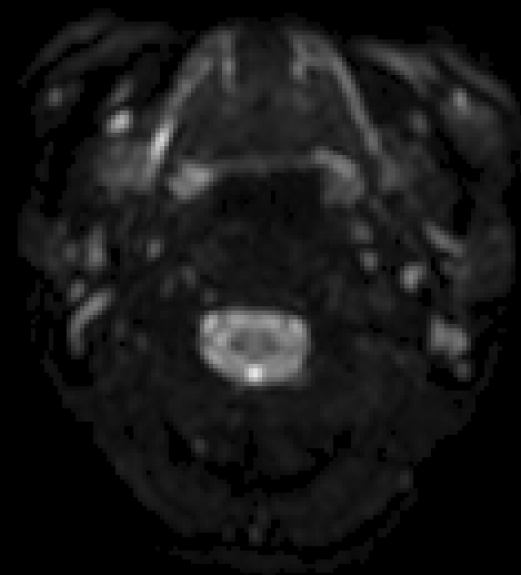

# Network instance 69

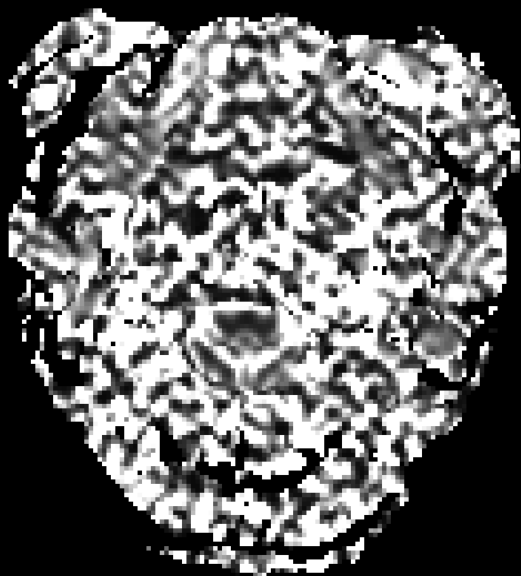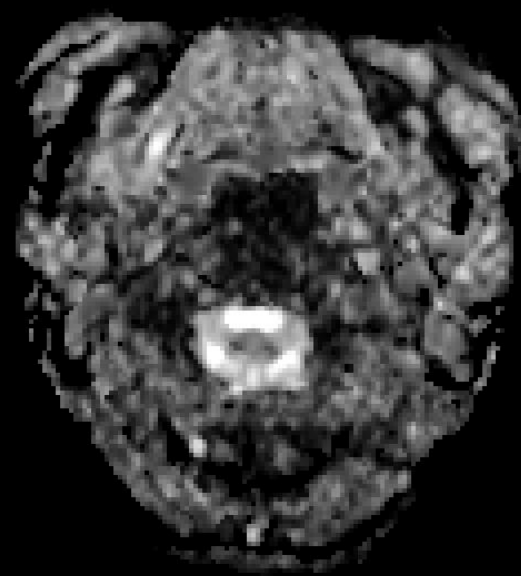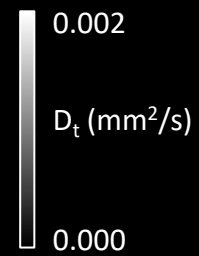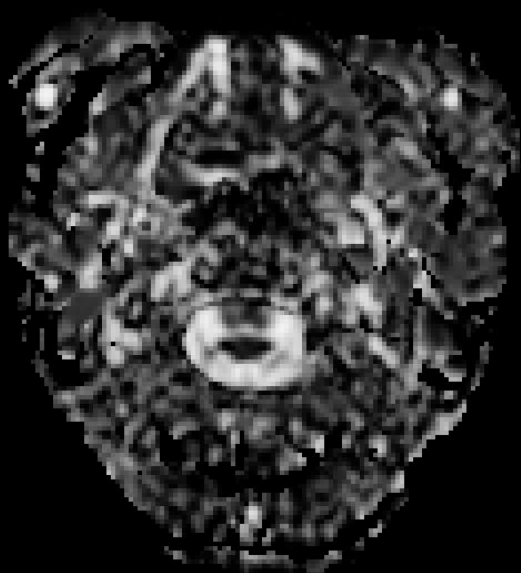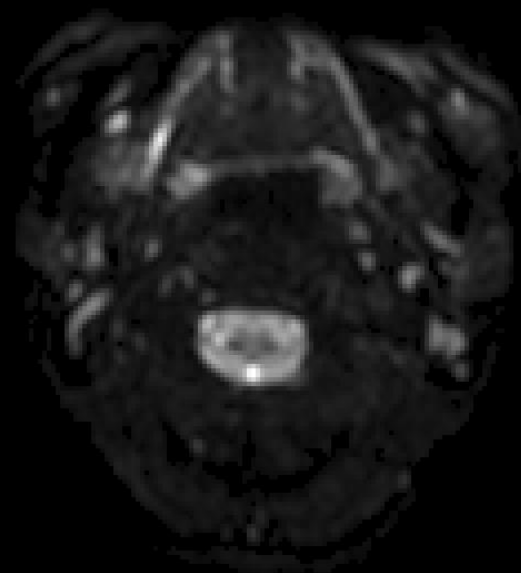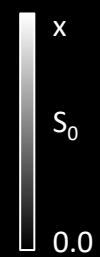

# Network instance 70

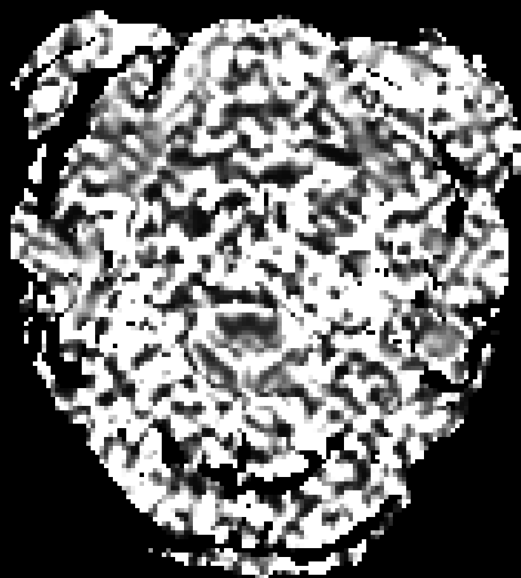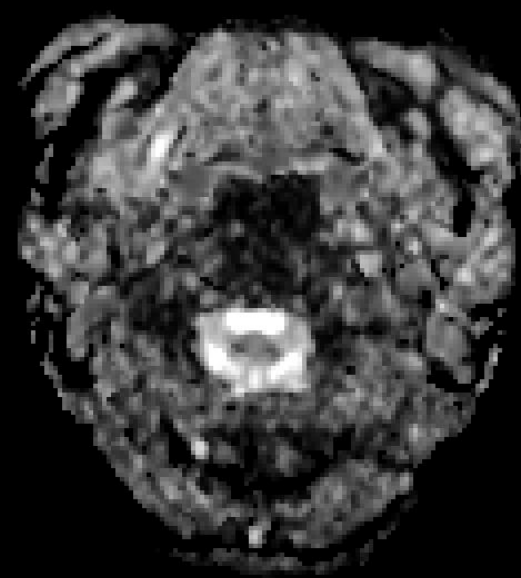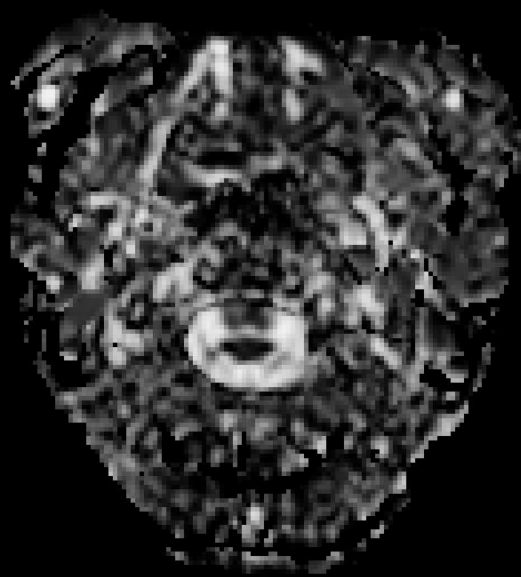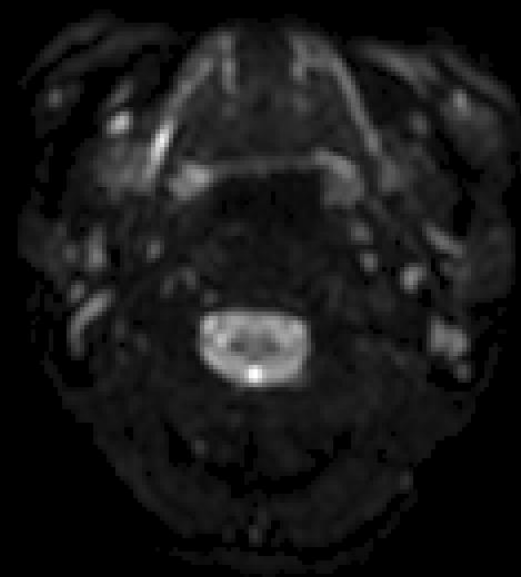



# Network instance 71

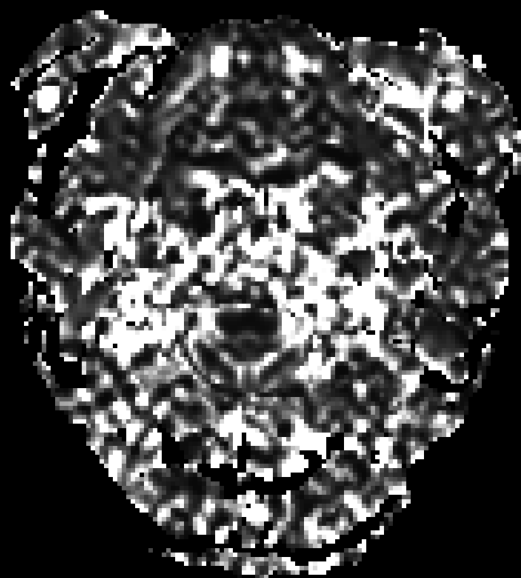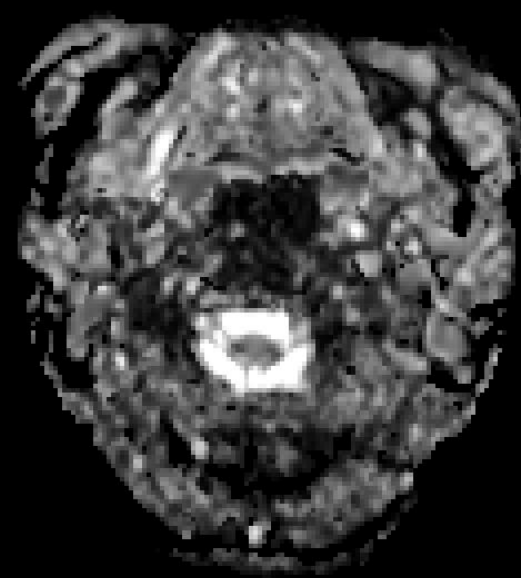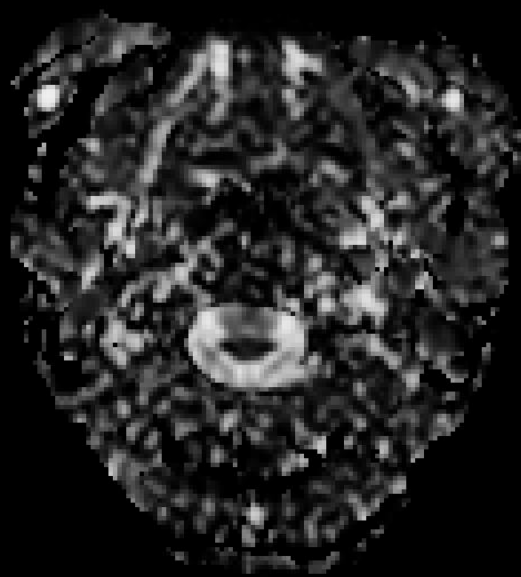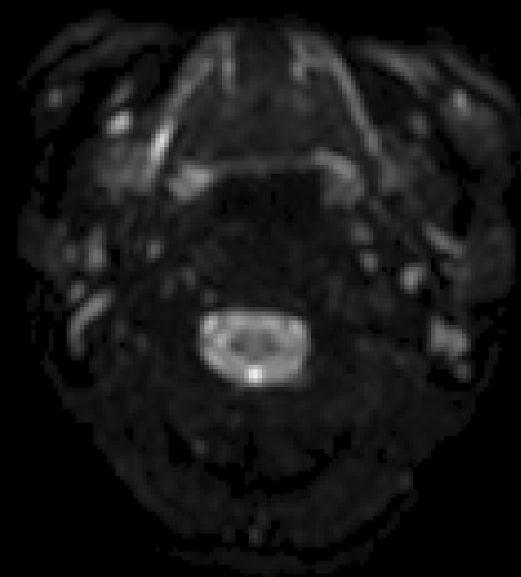

# Network instance 72

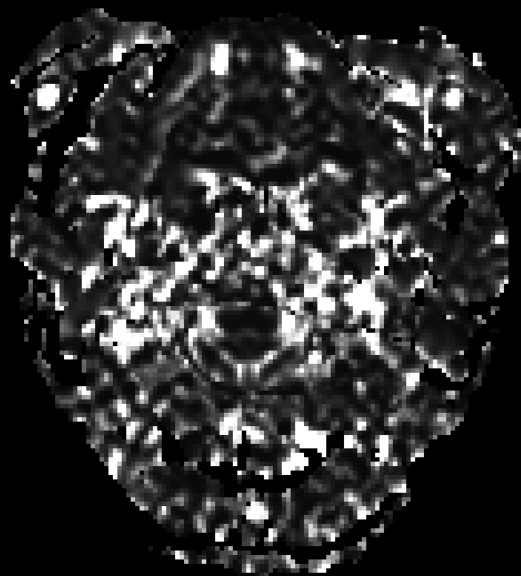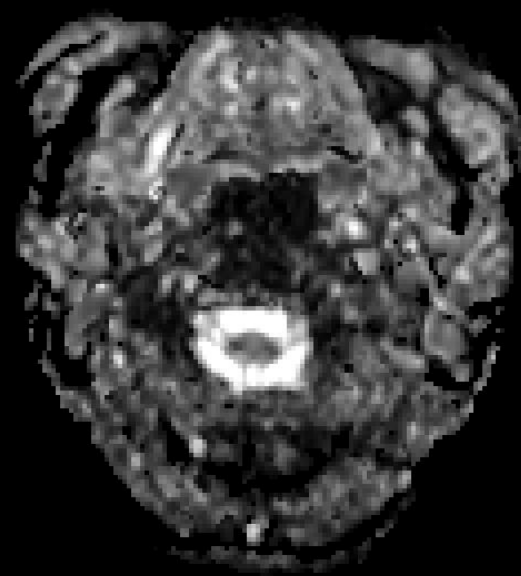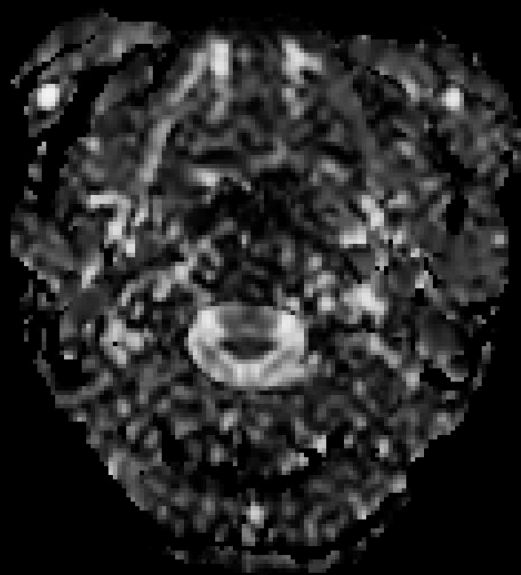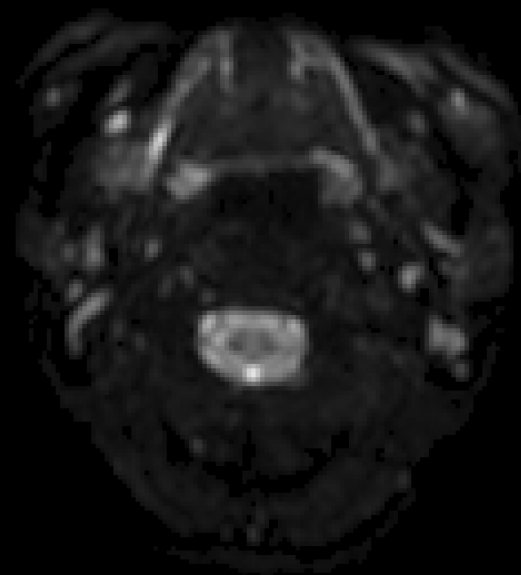

# Network instance 73

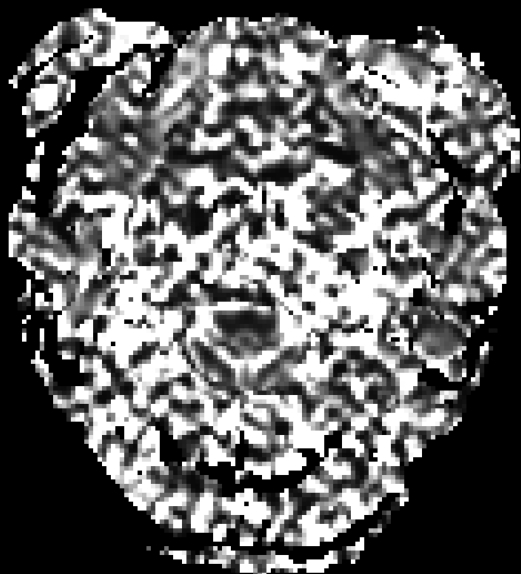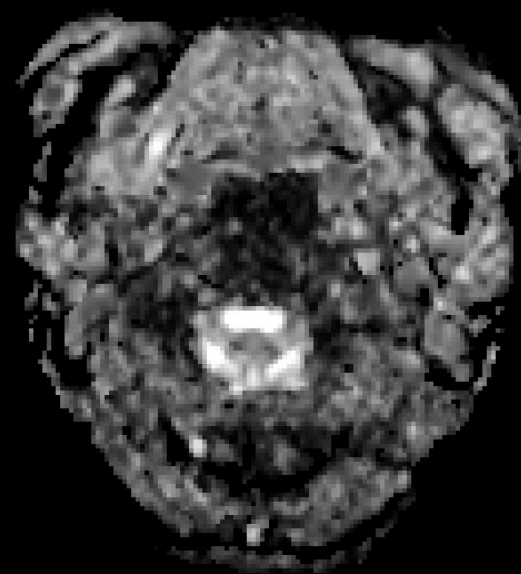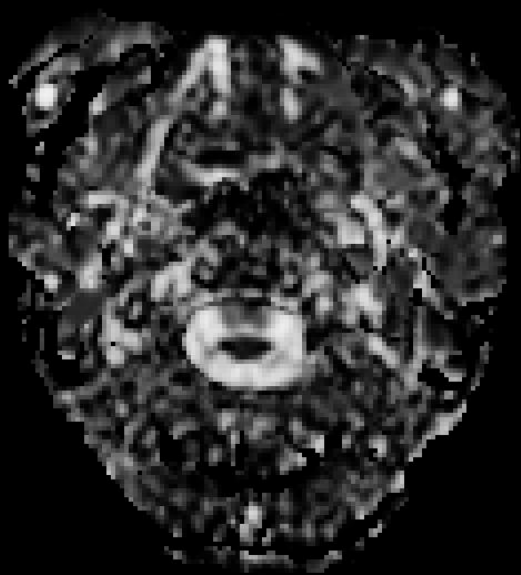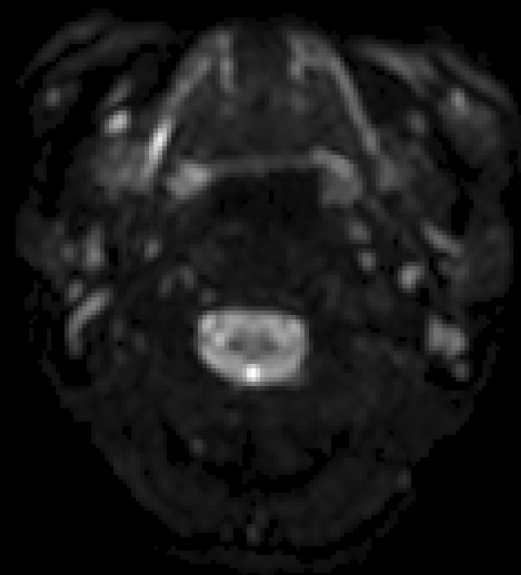

# Network instance 74

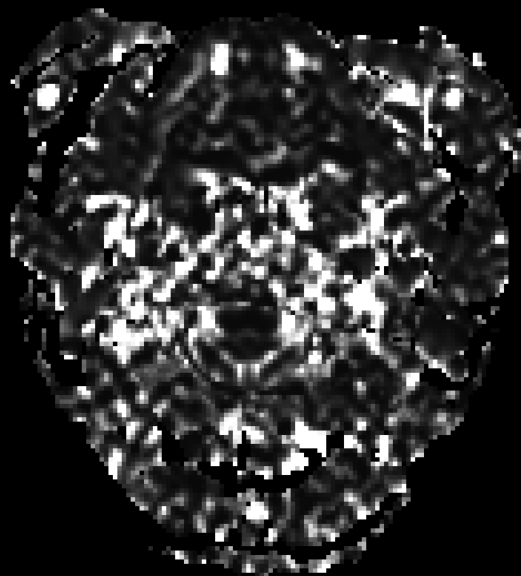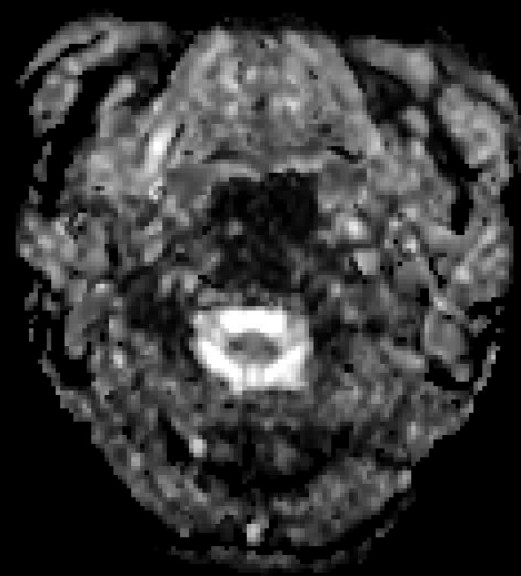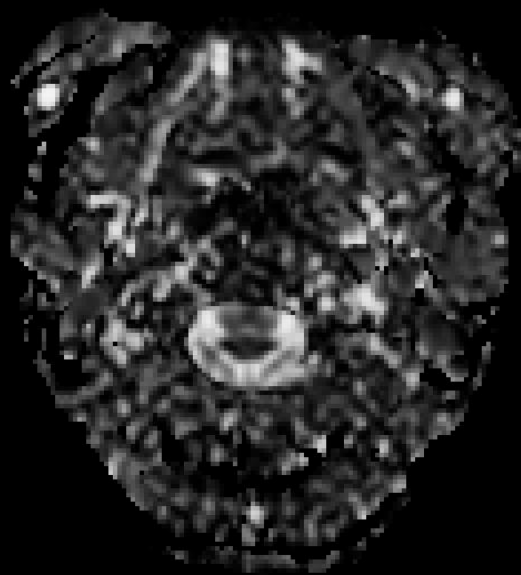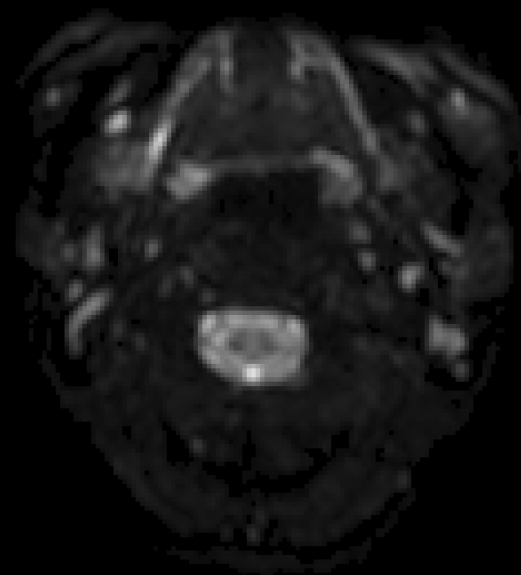

# Network instance 75

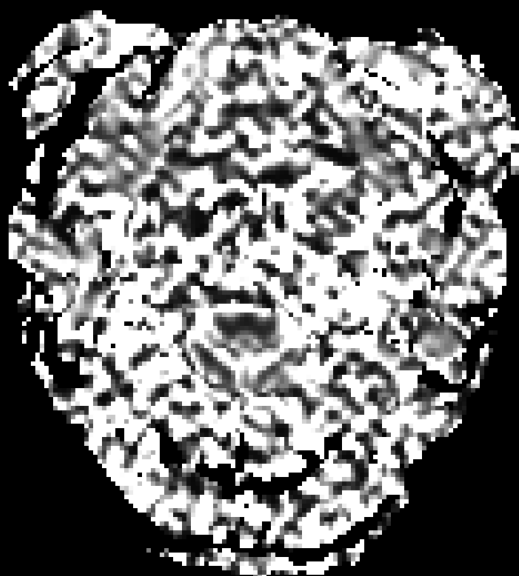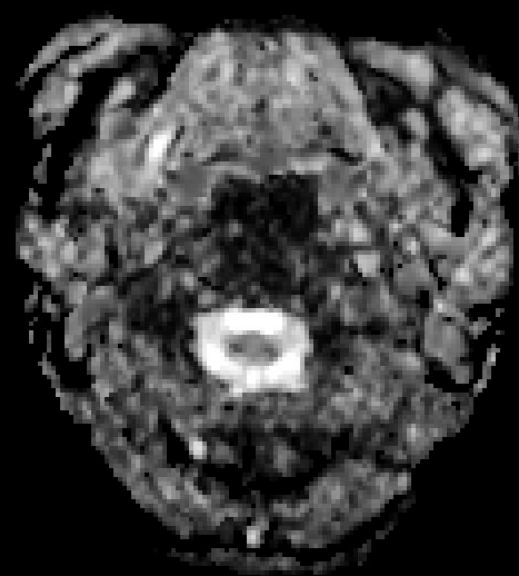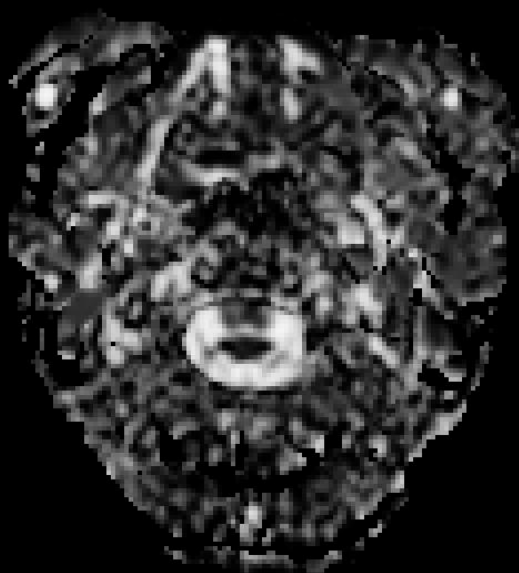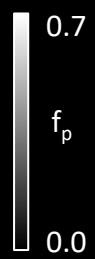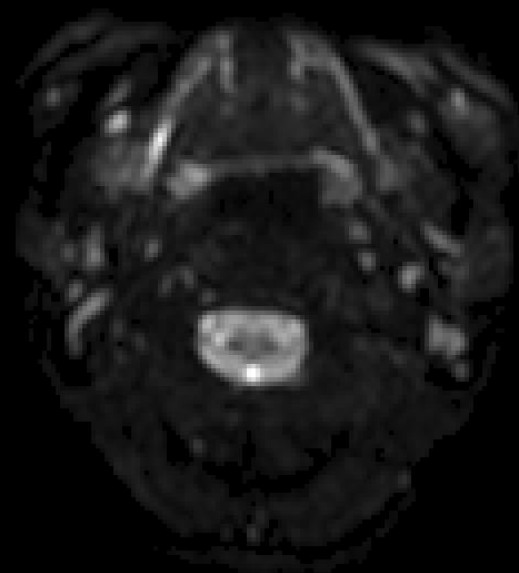

# Network instance 76

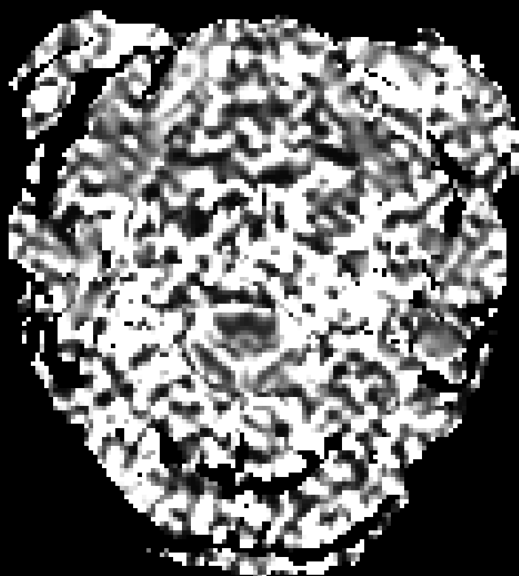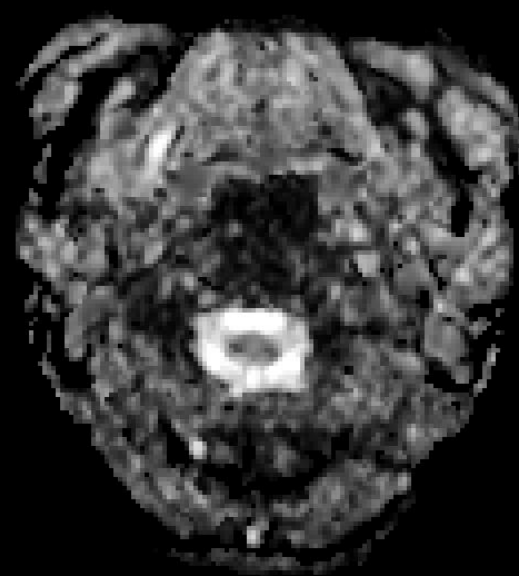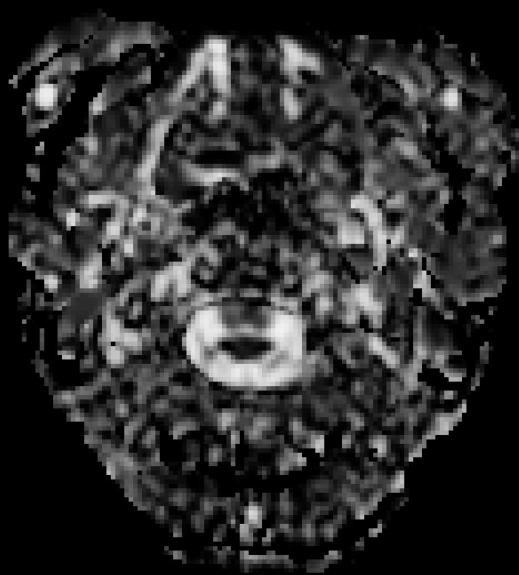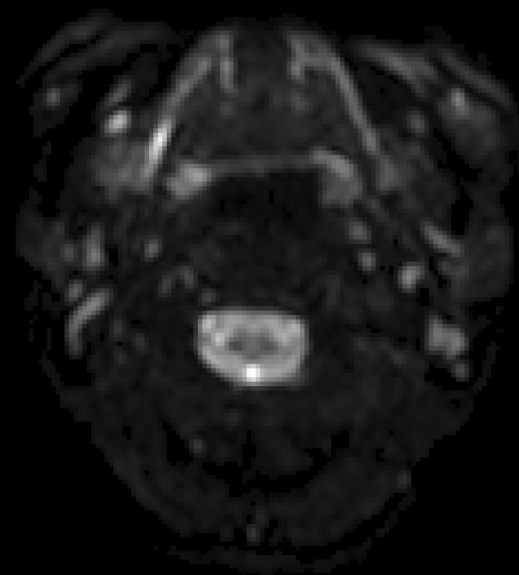

Network instance 77

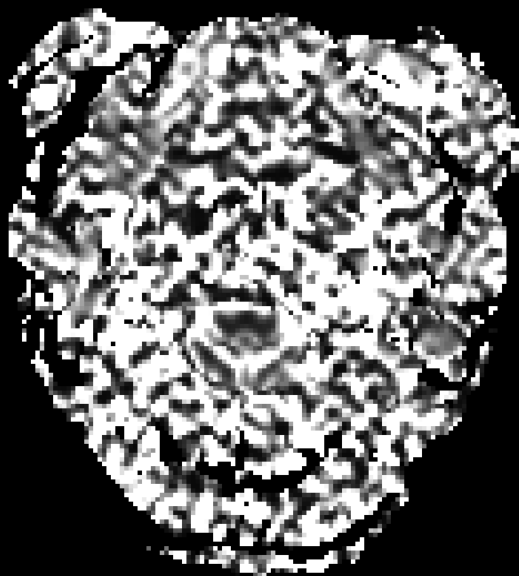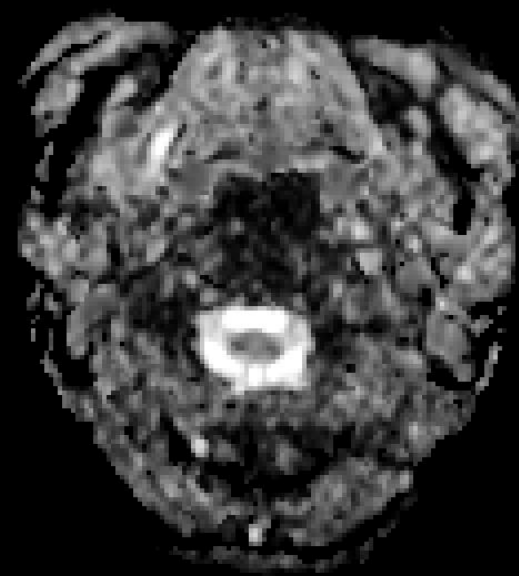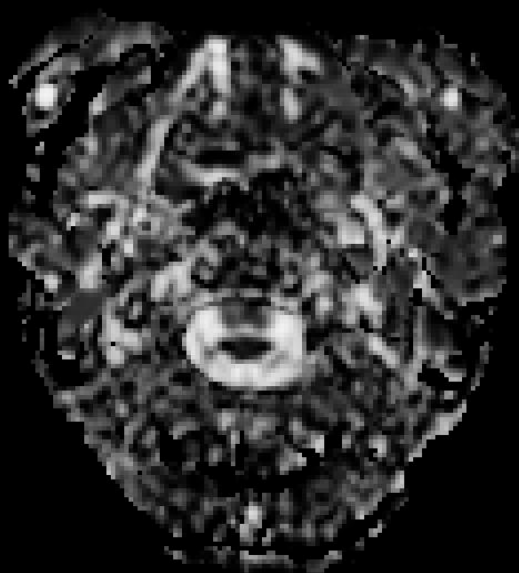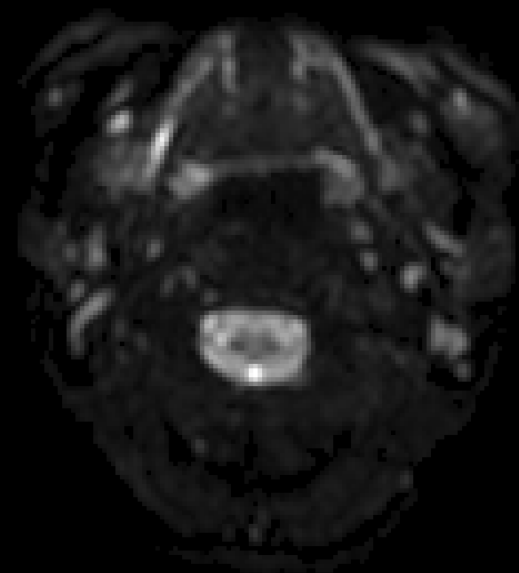

Network instance 78

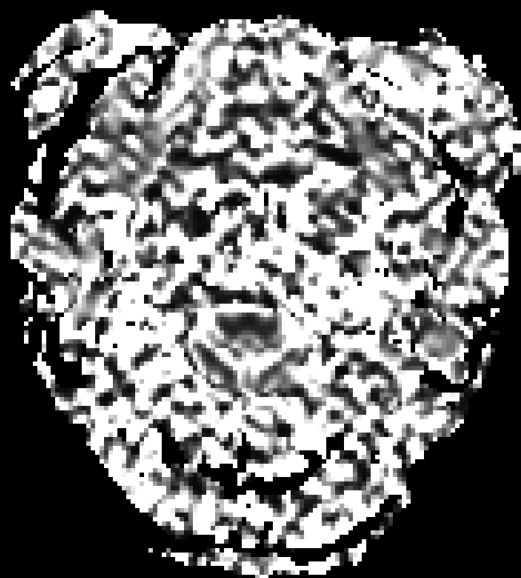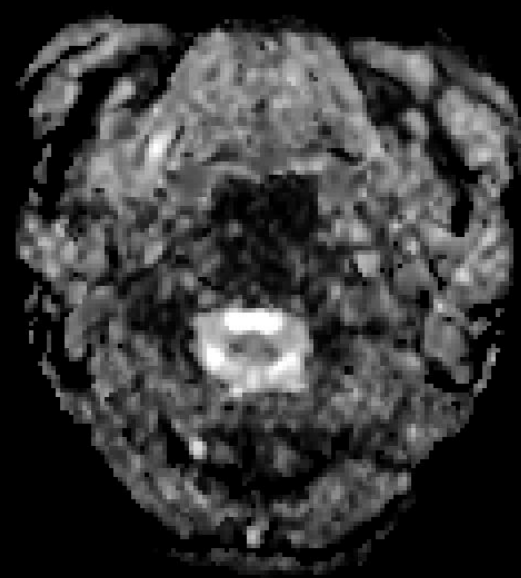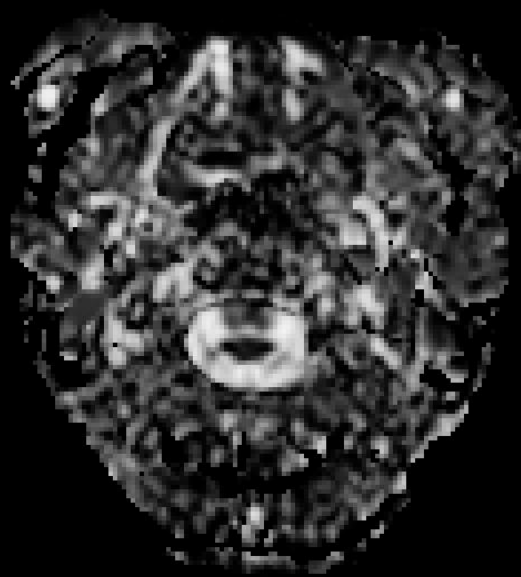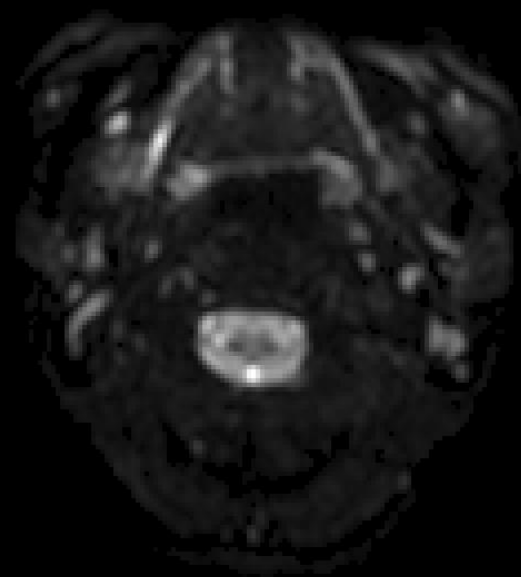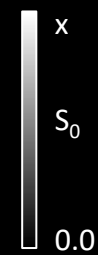



# Network instance 79

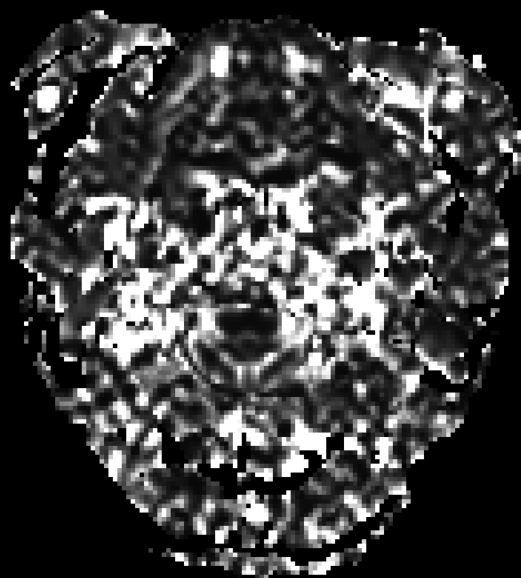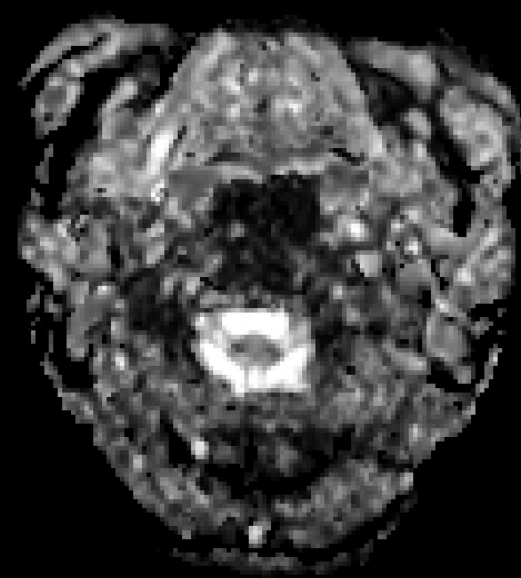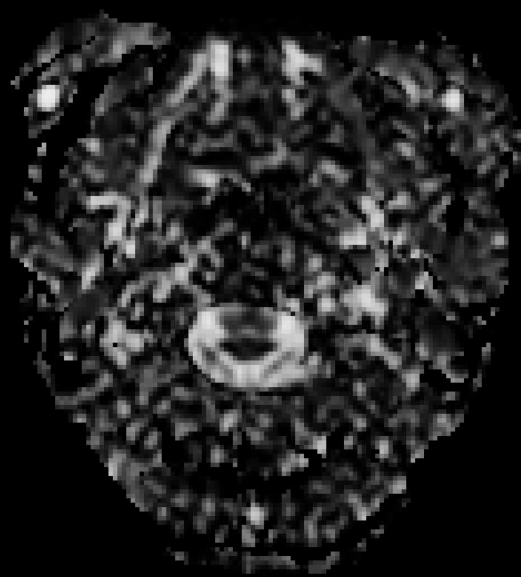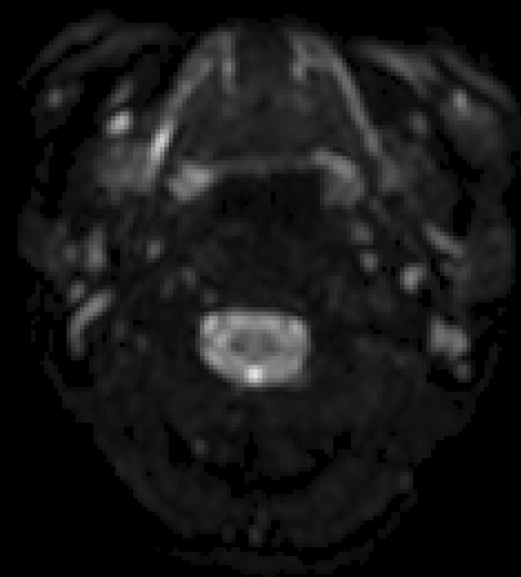

# Network instance 80

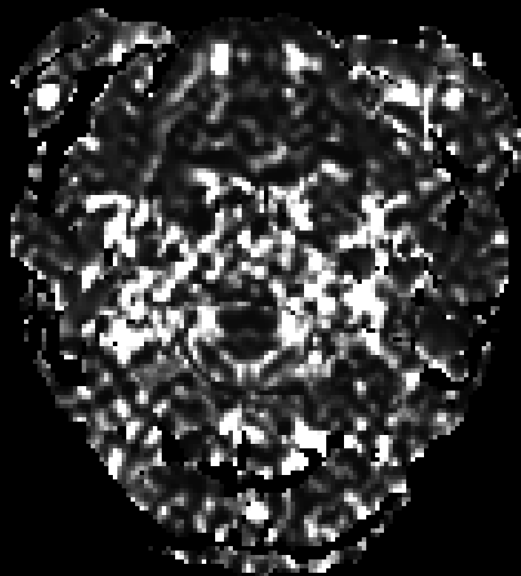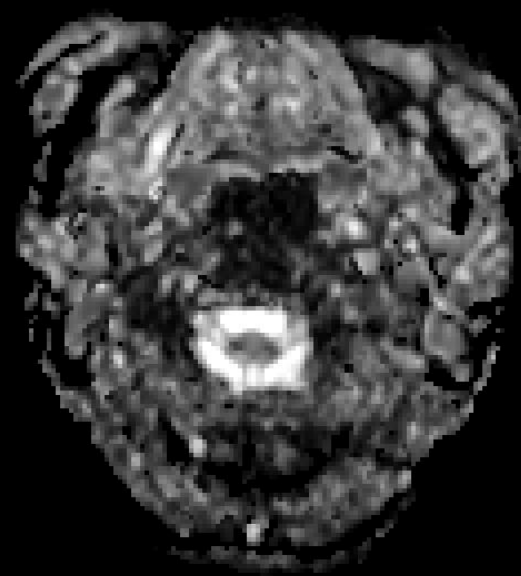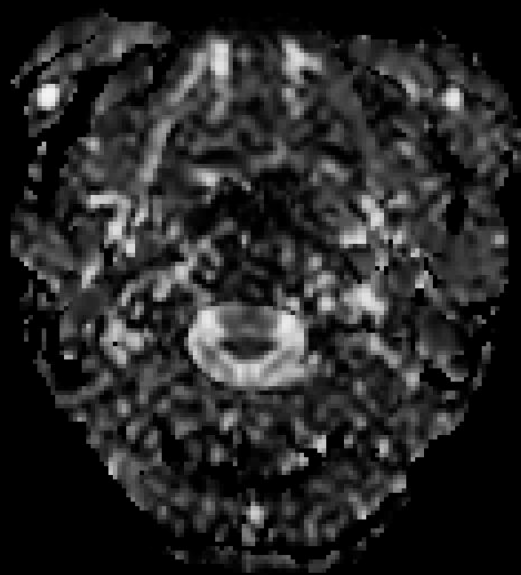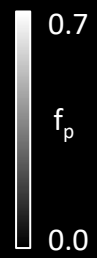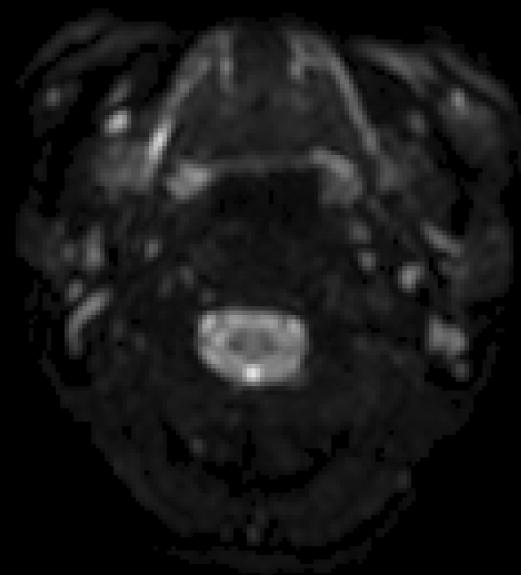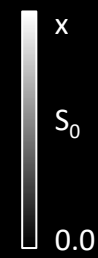

# Network instance 81

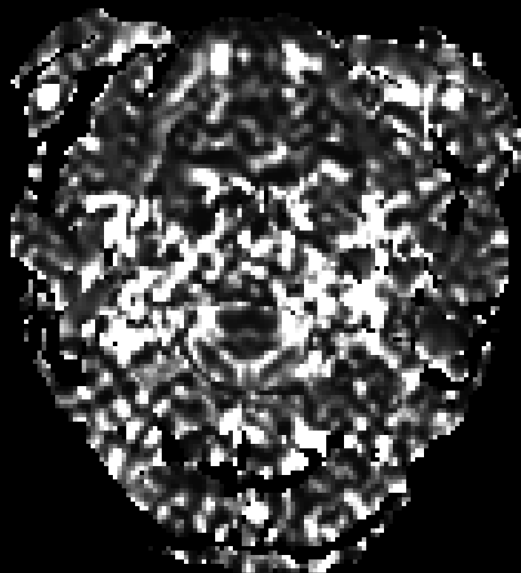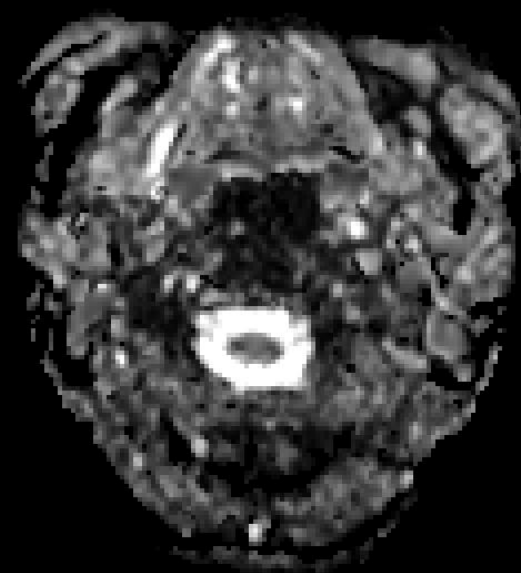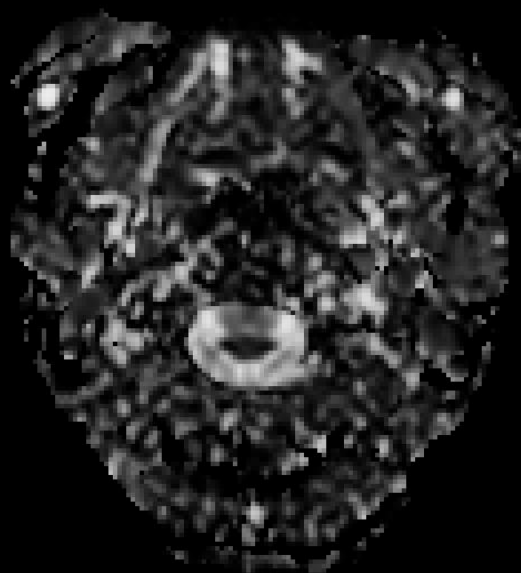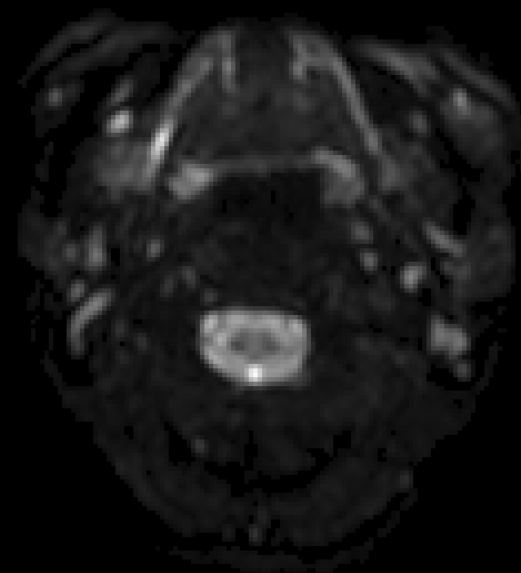

# Network instance 82

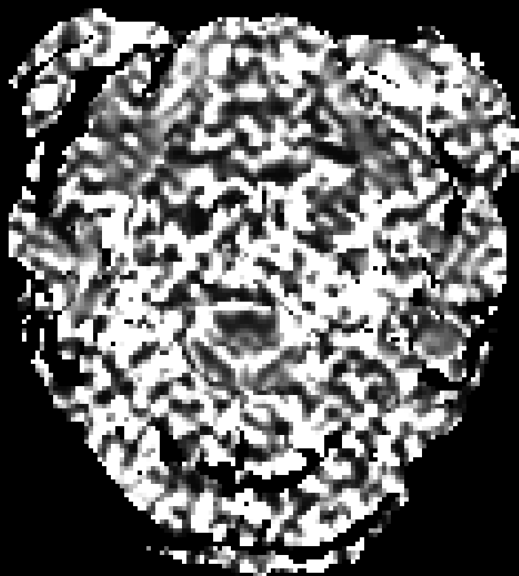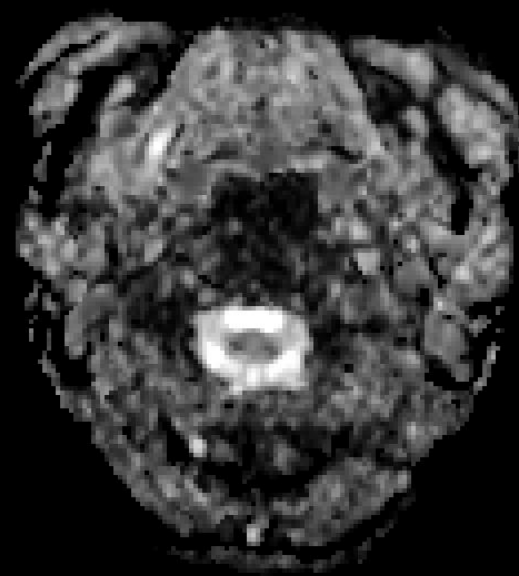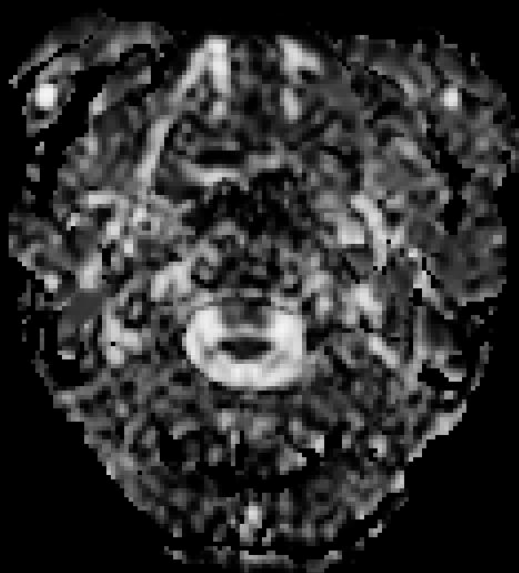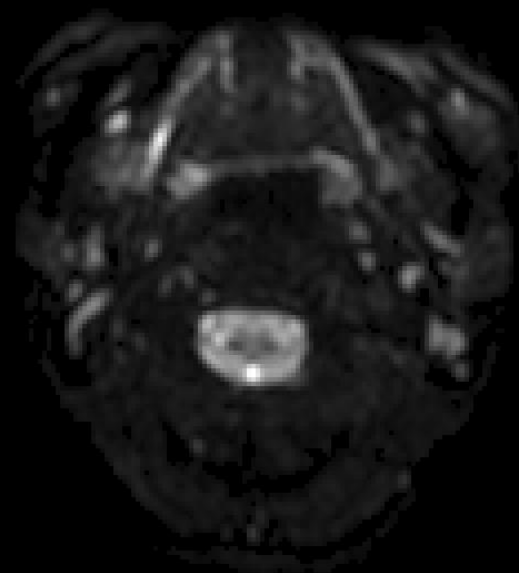

# Network instance 83

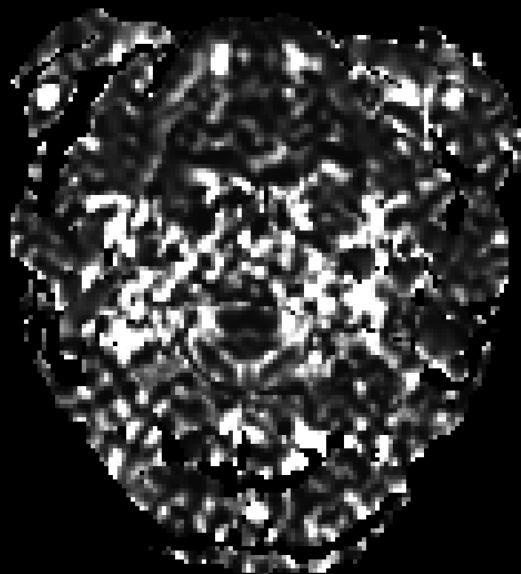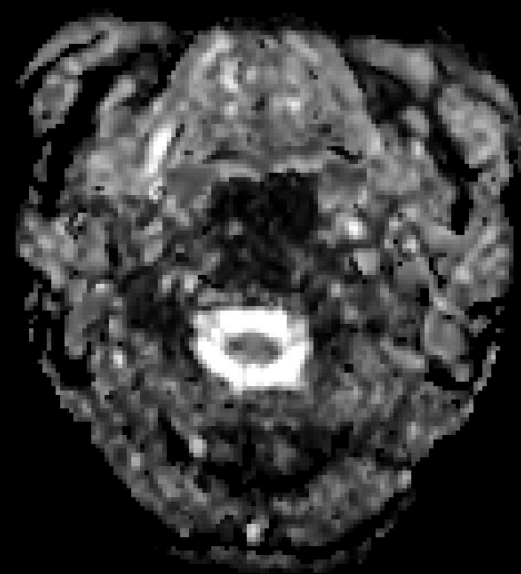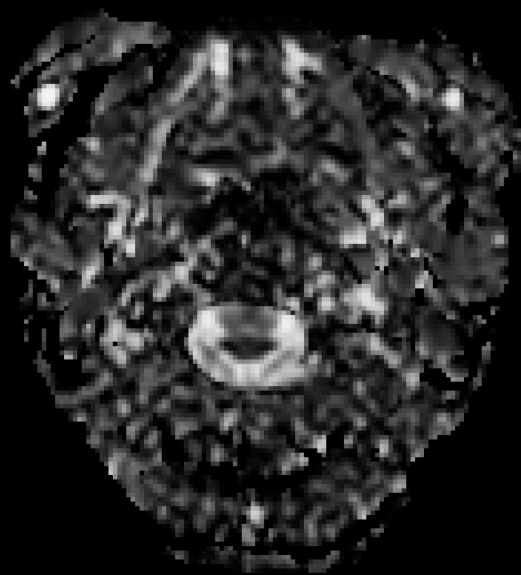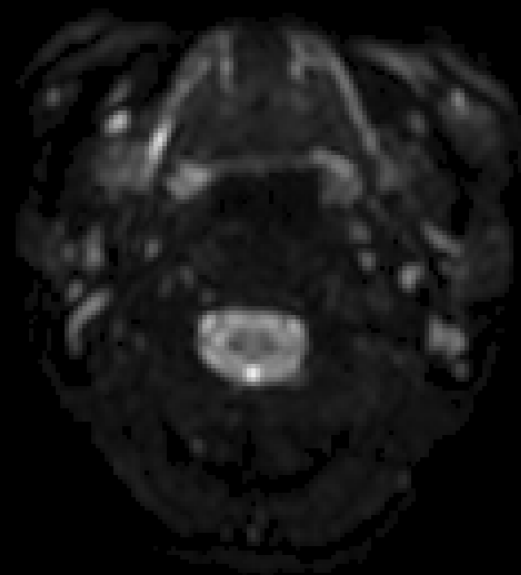

# Network instance 84

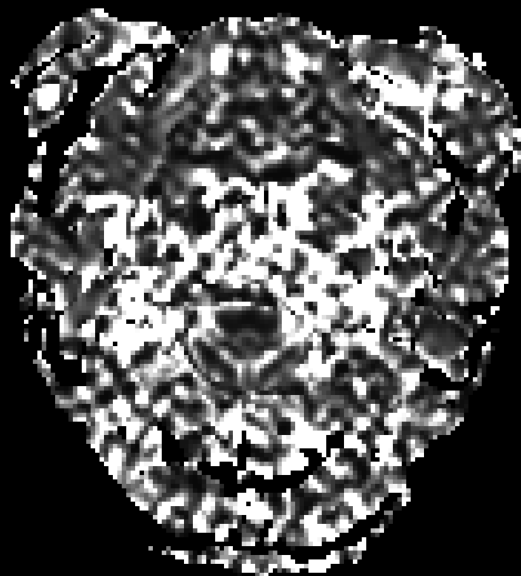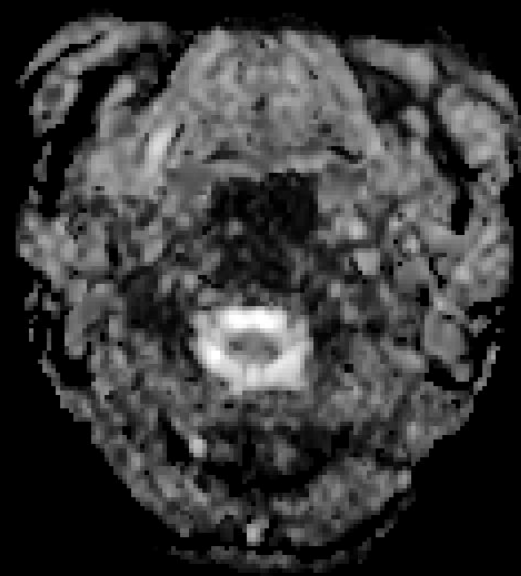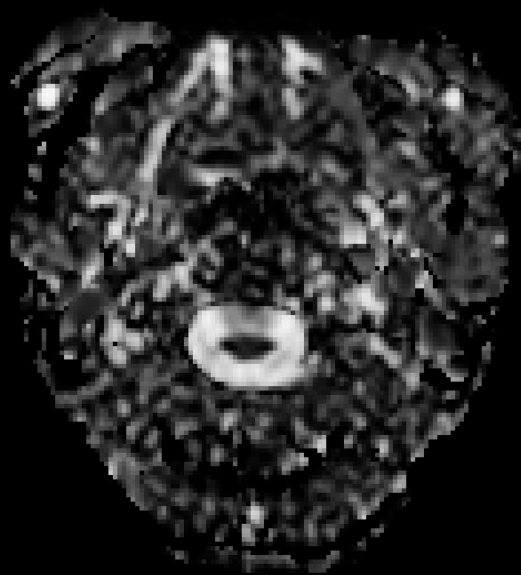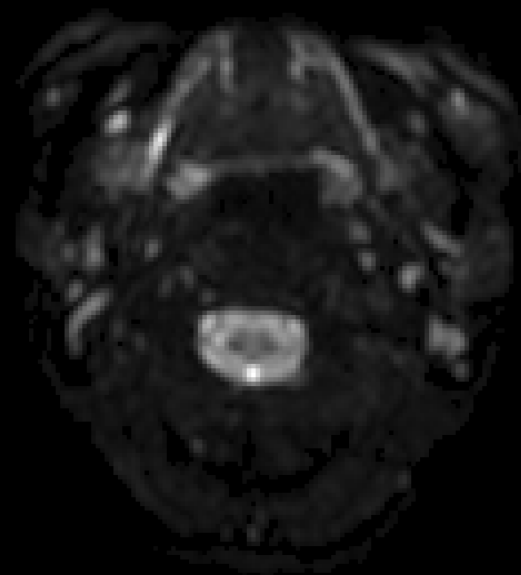

# Network instance 85

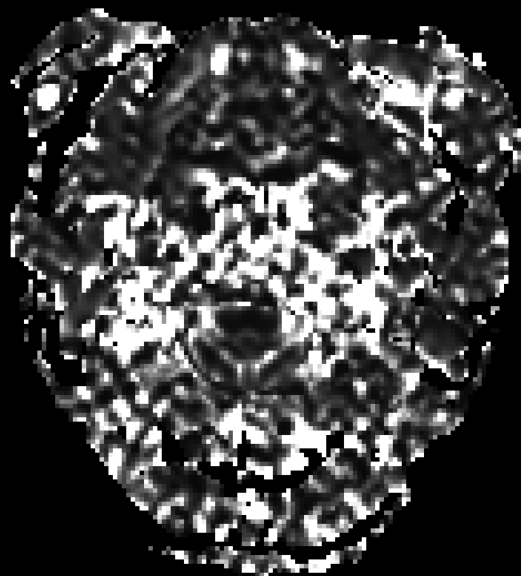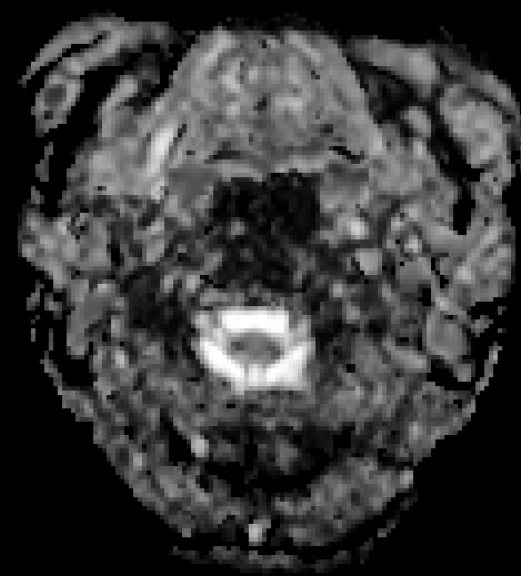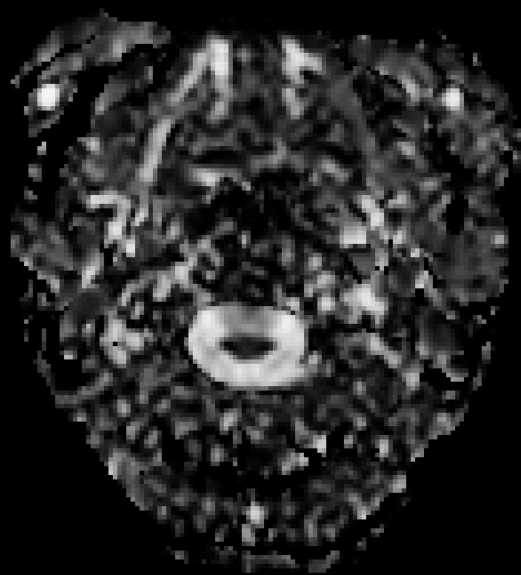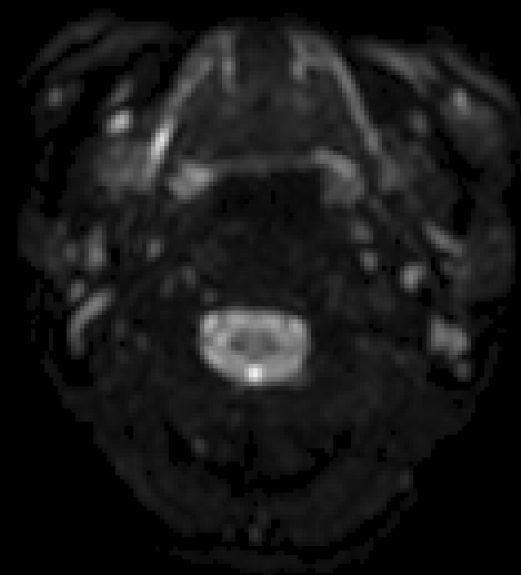

# Network instance 86

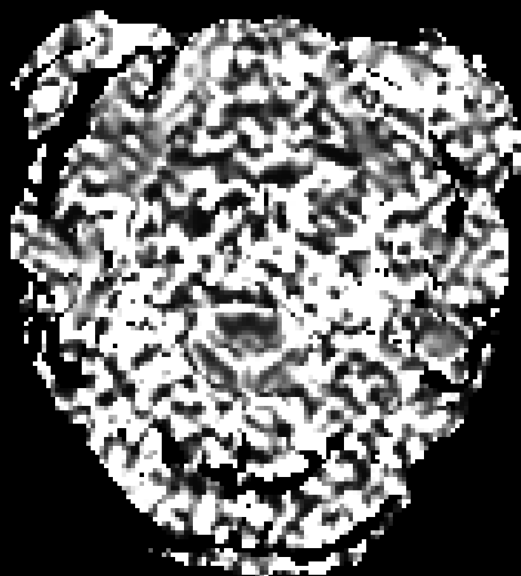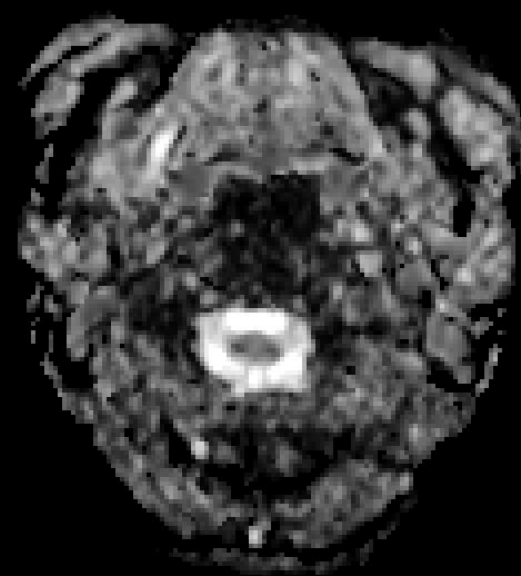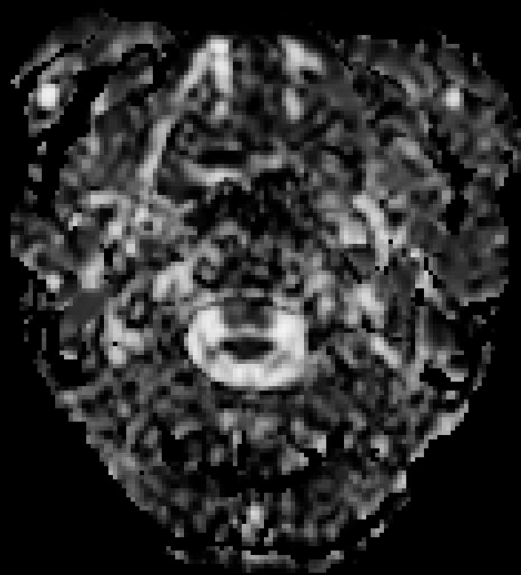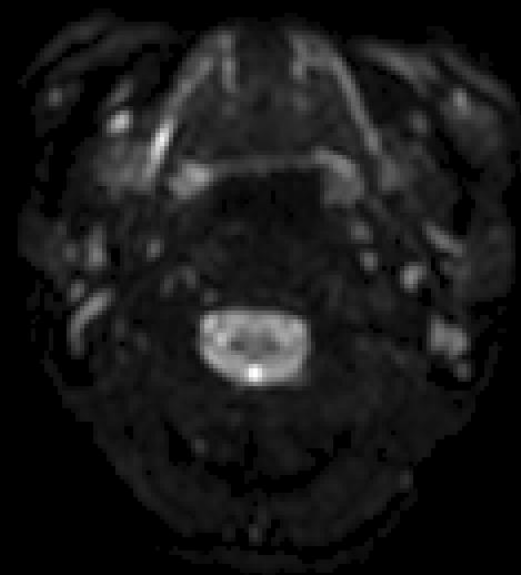



# Network instance 87

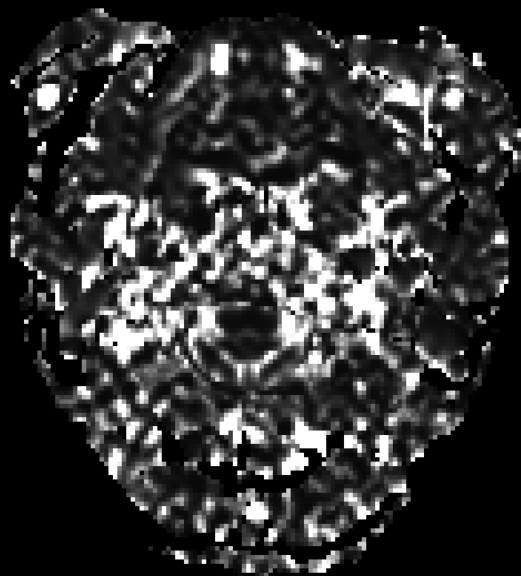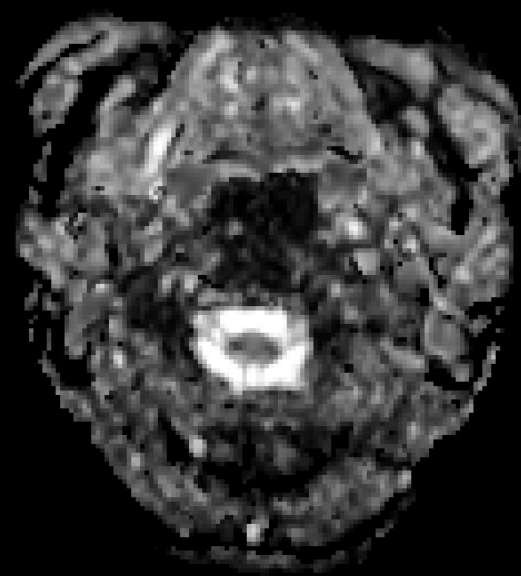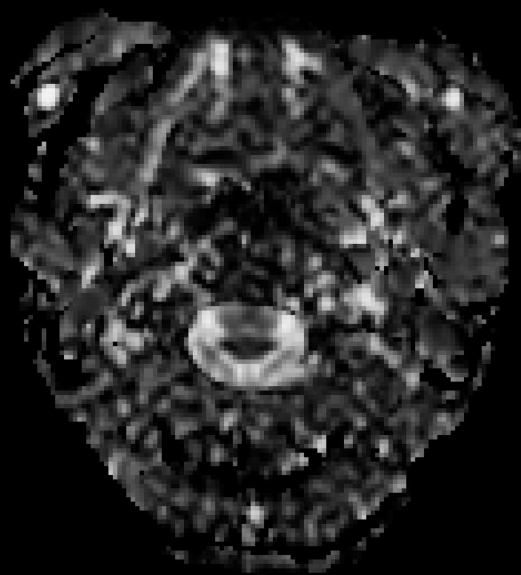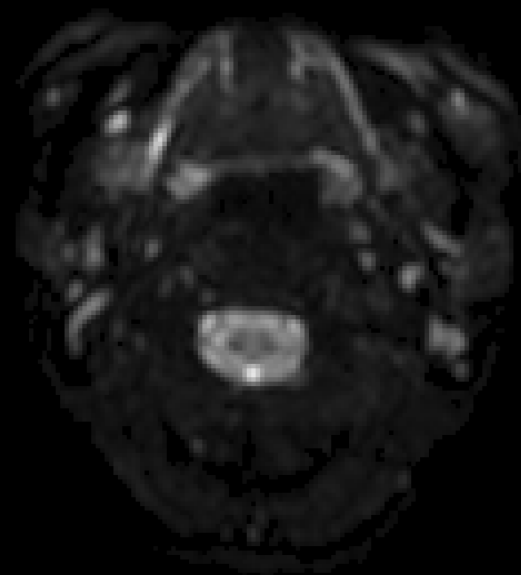

# Network instance 88

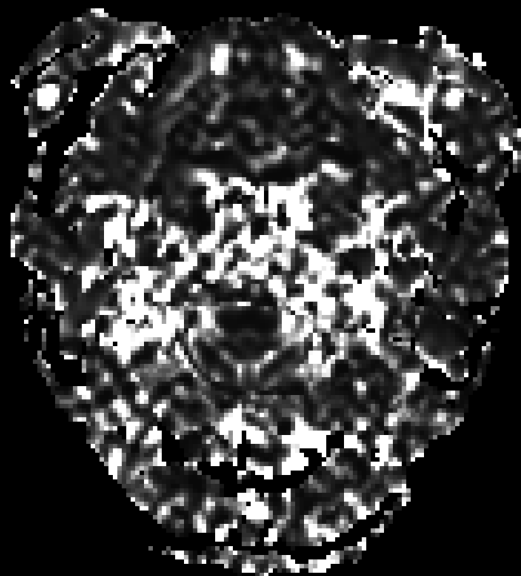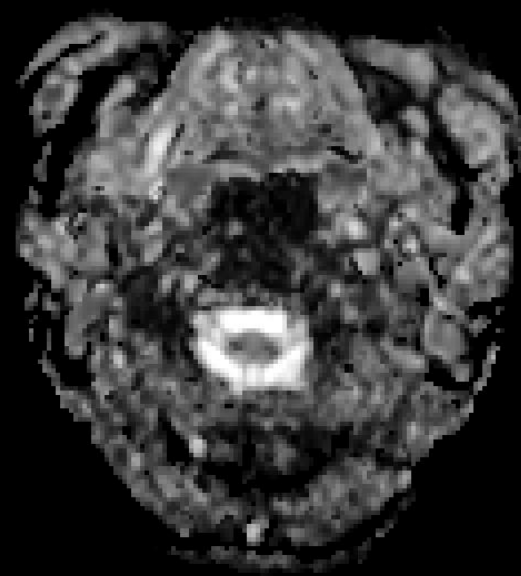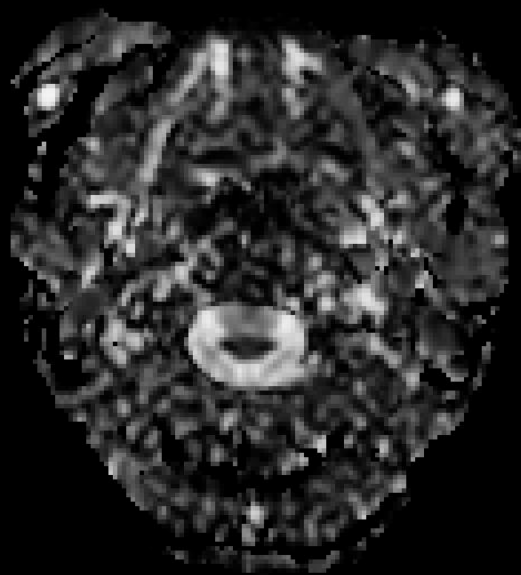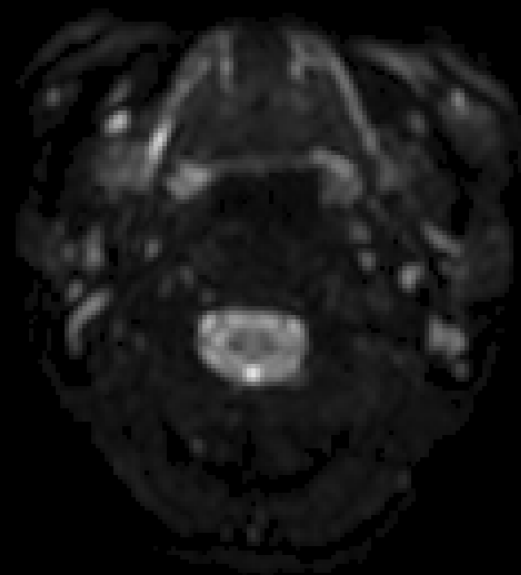

# Network instance 89

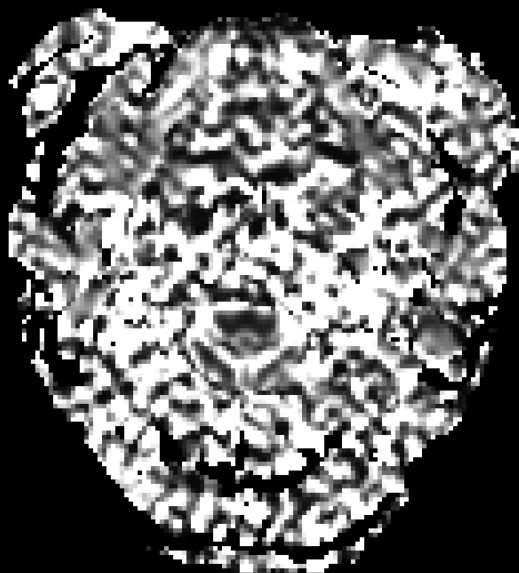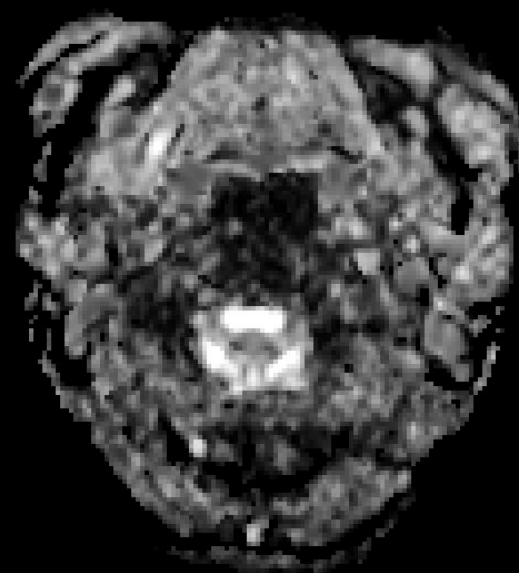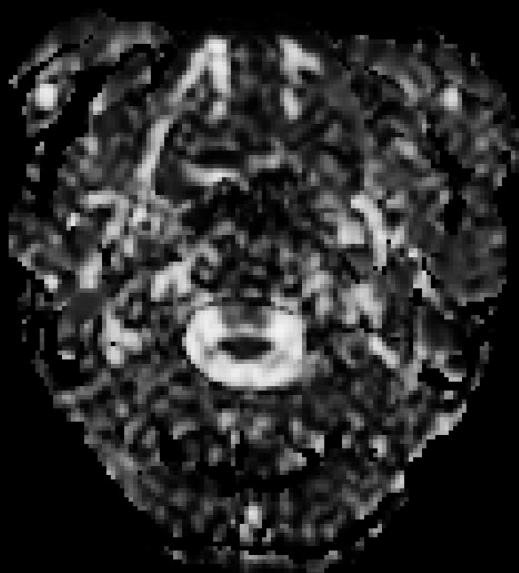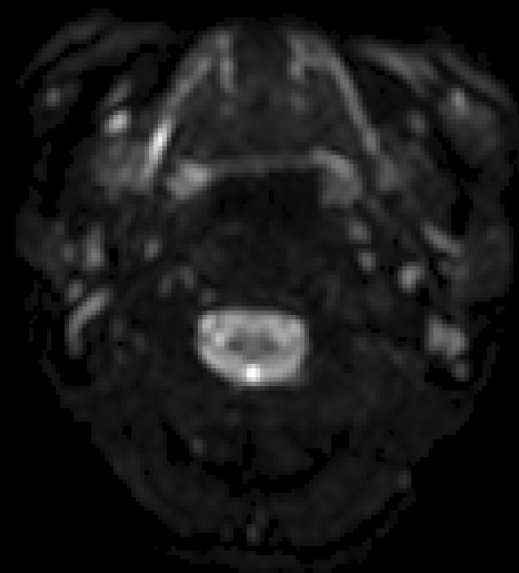

# Network instance 90

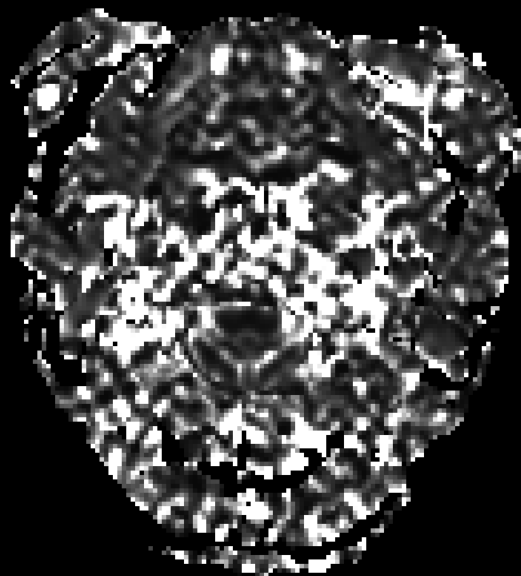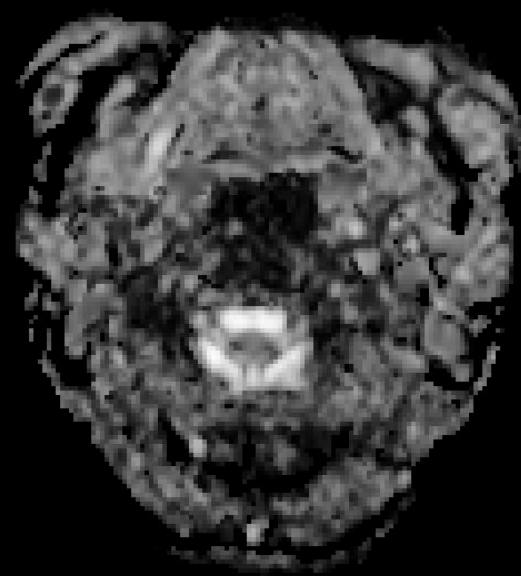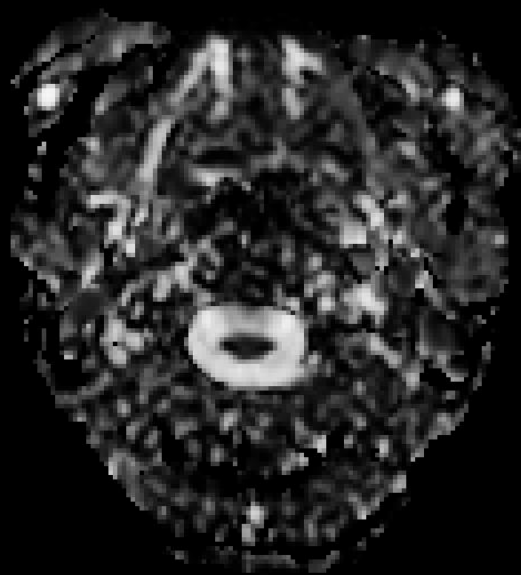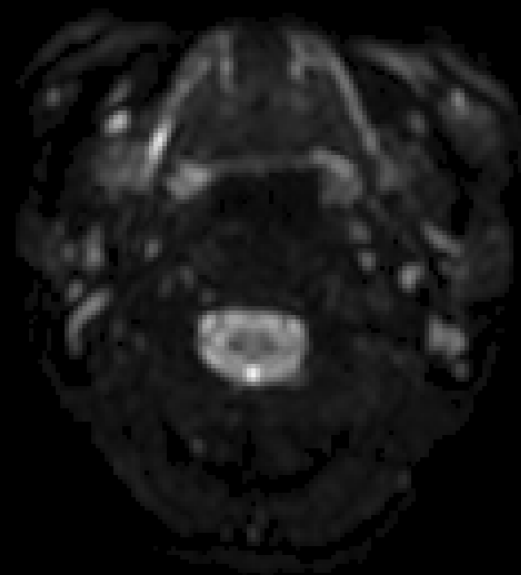

# Network instance 91

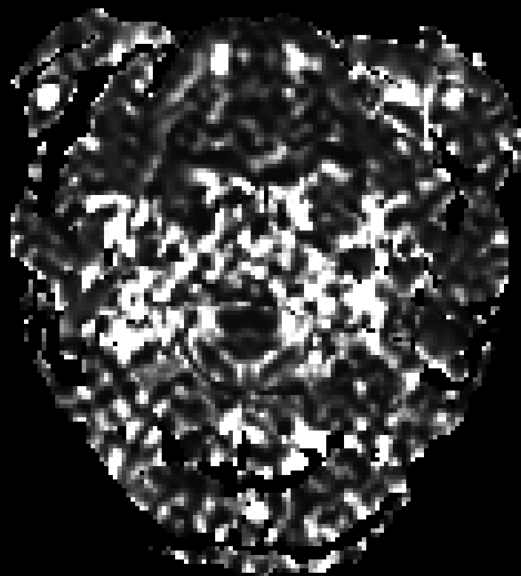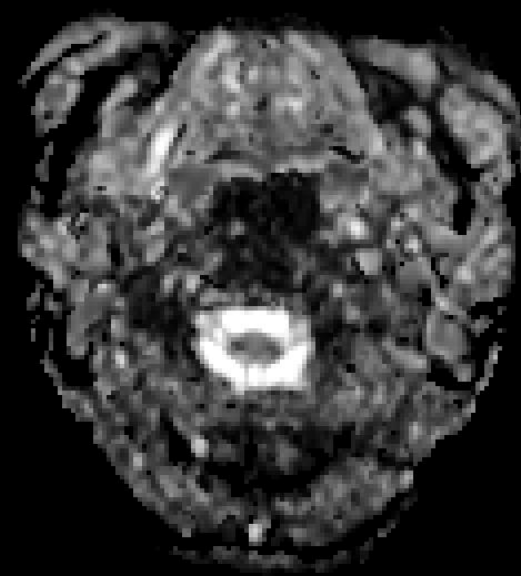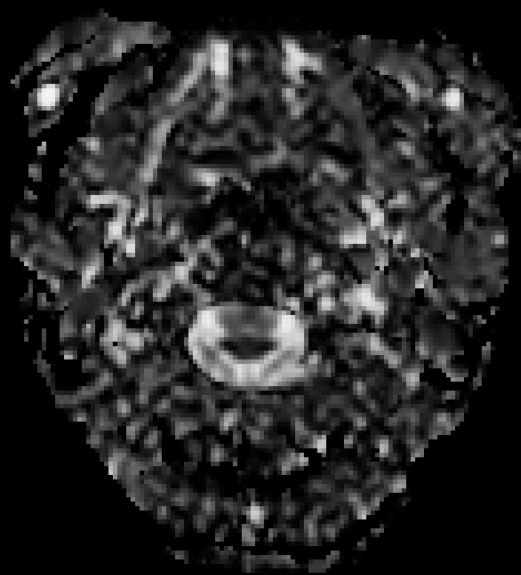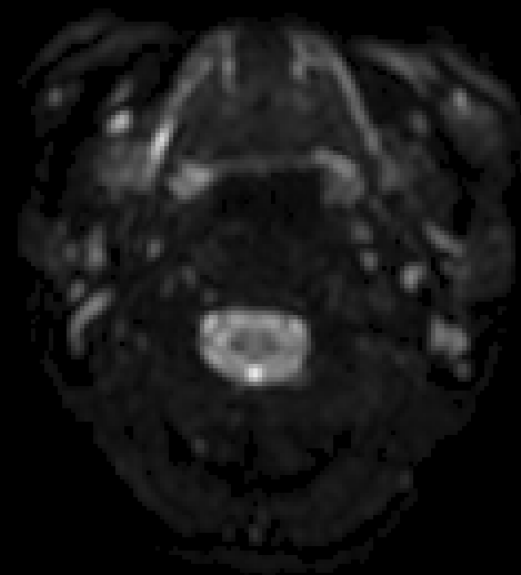

# Network instance 92

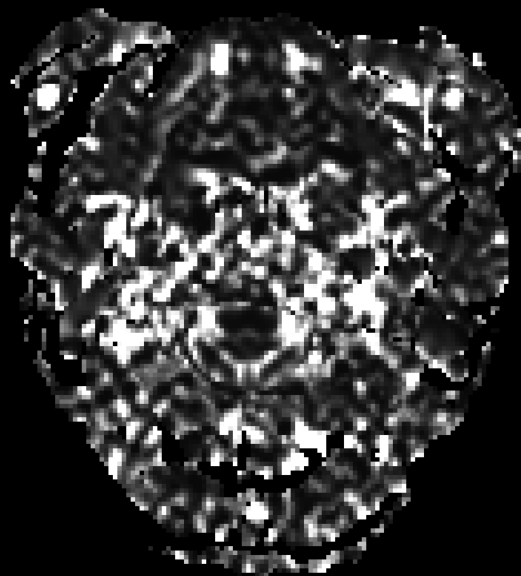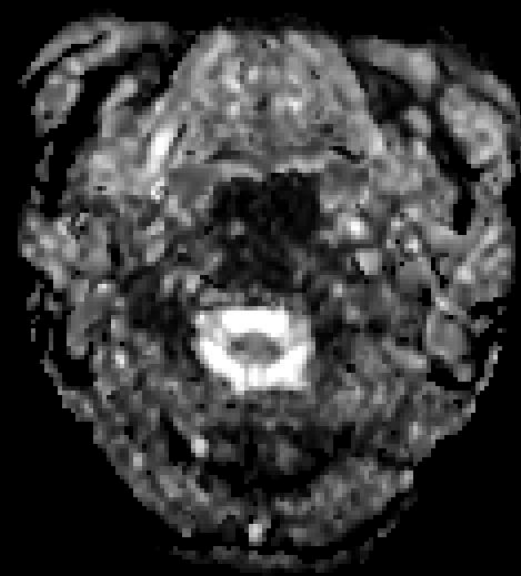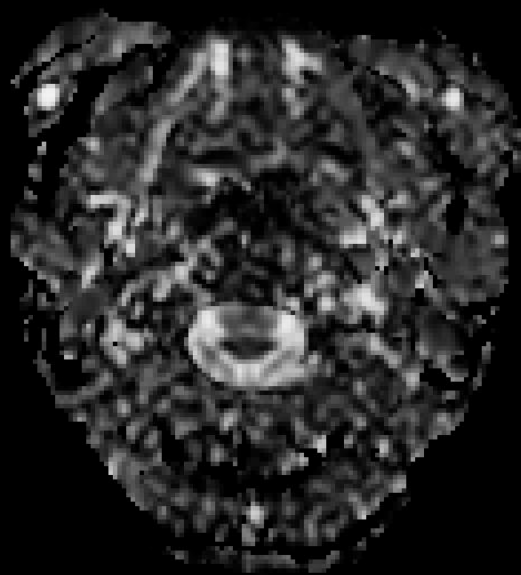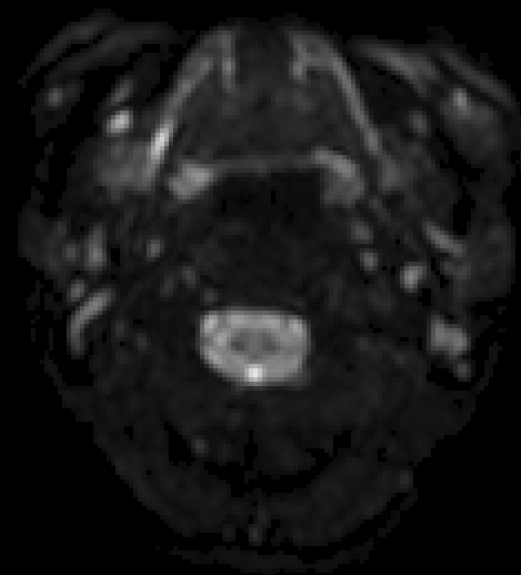

# Network instance 93

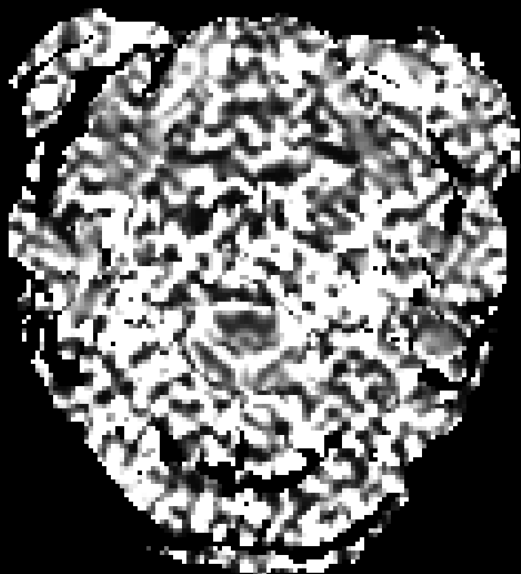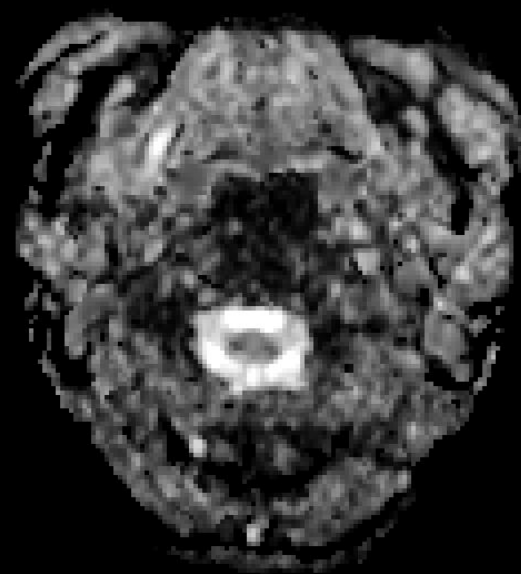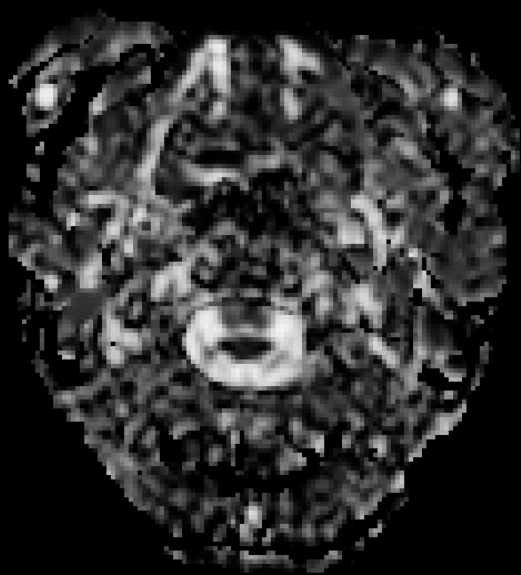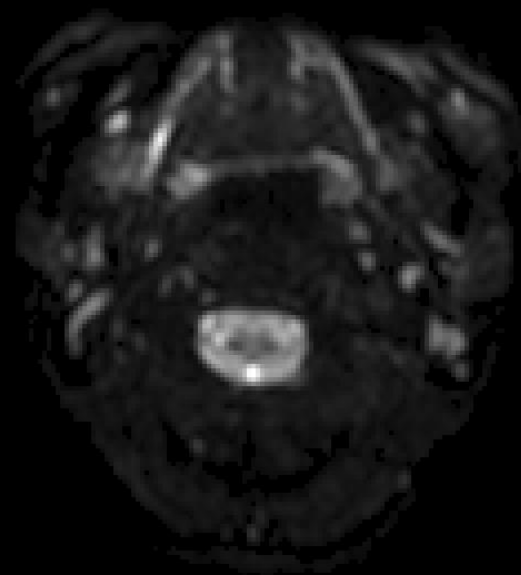

# Network instance 94

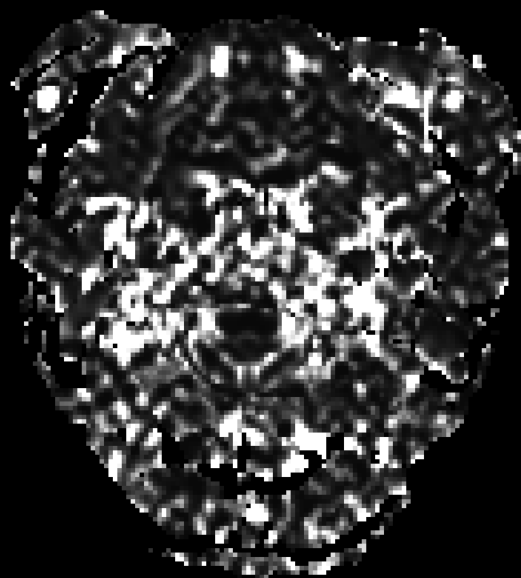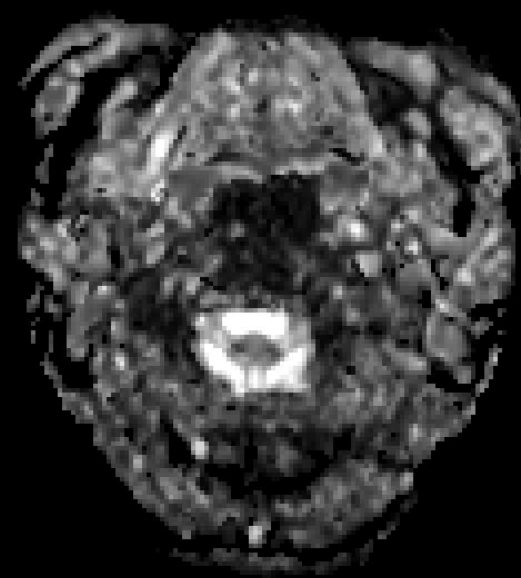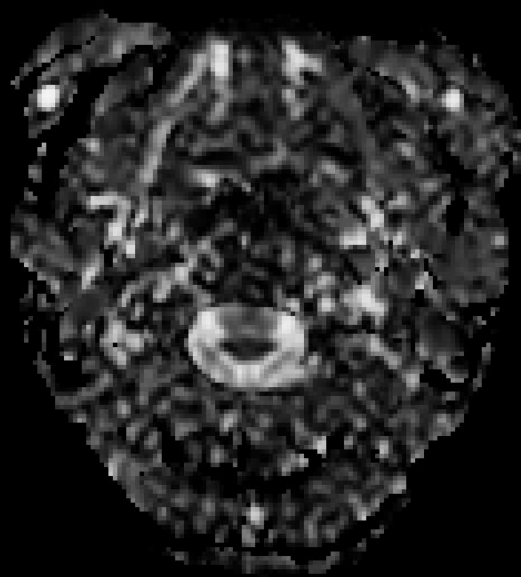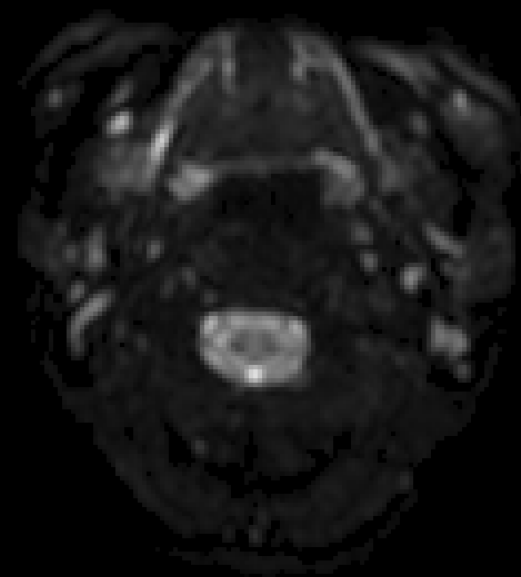



# Network instance 95

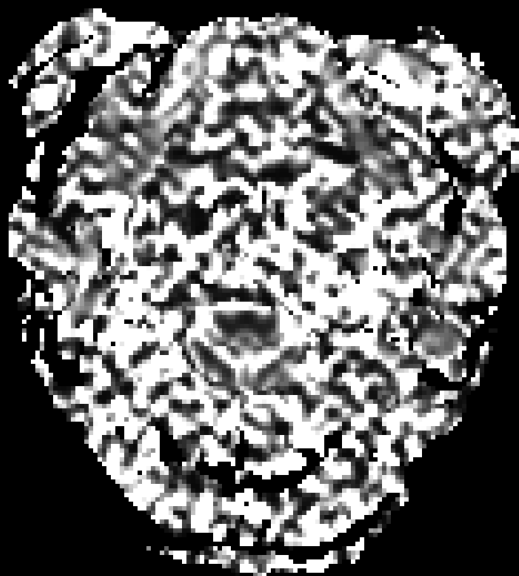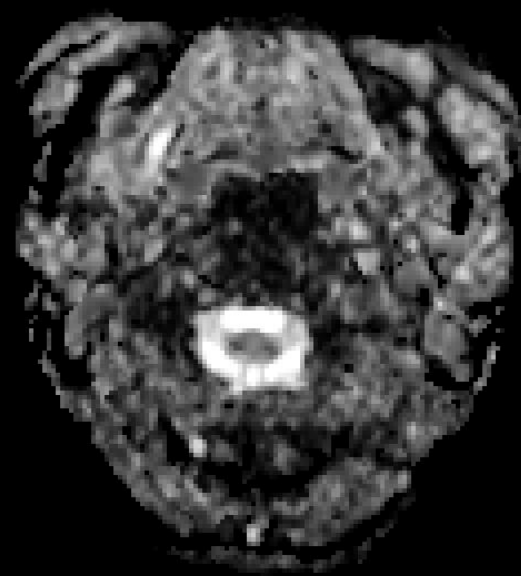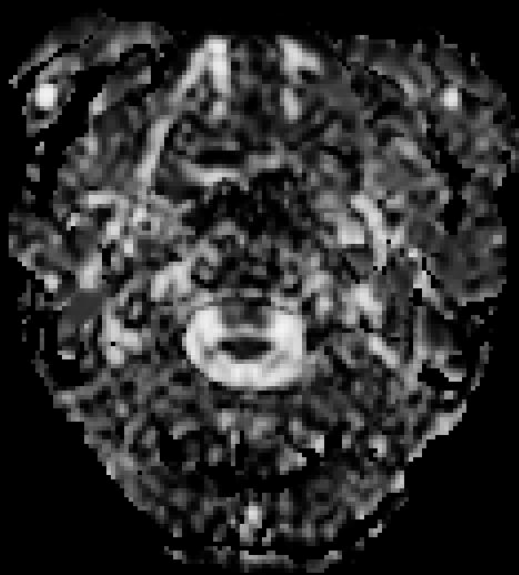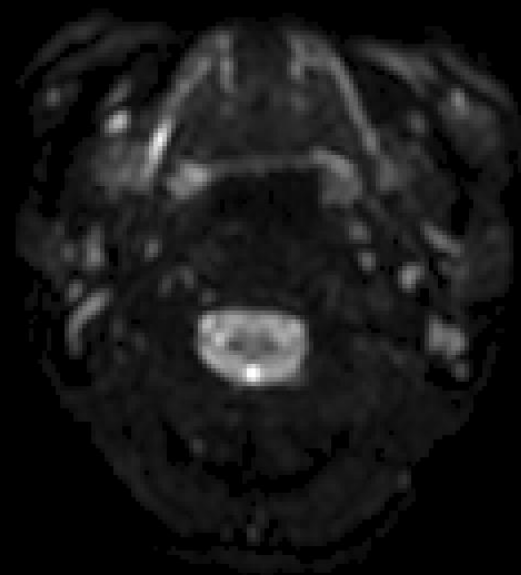

# Network instance 96

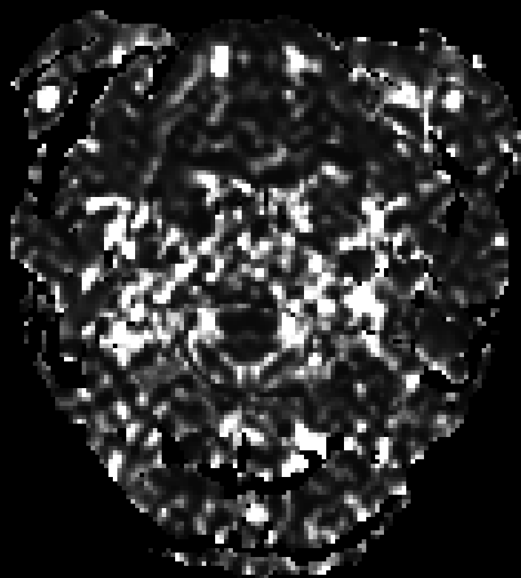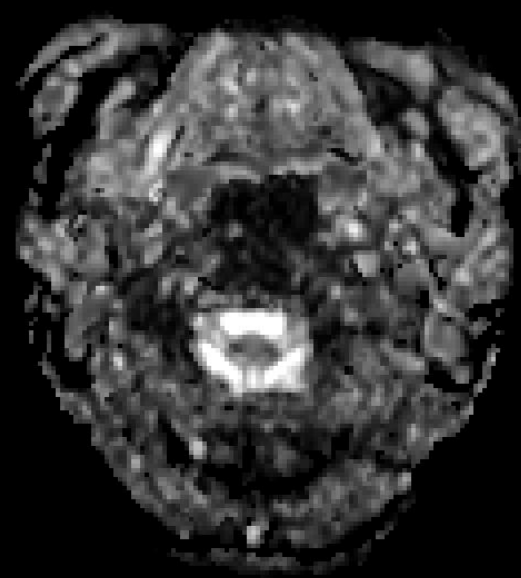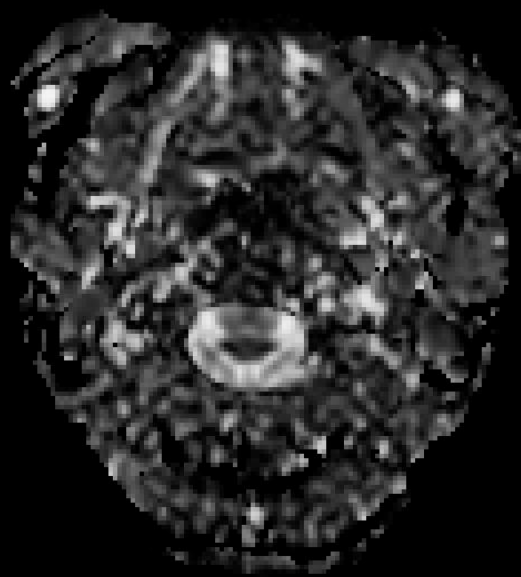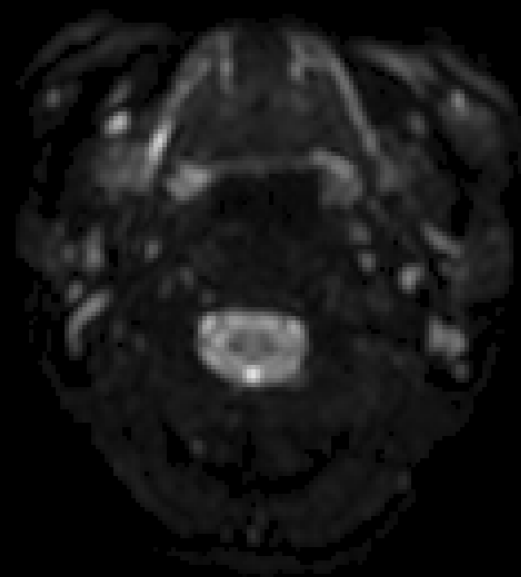

# Network instance 97

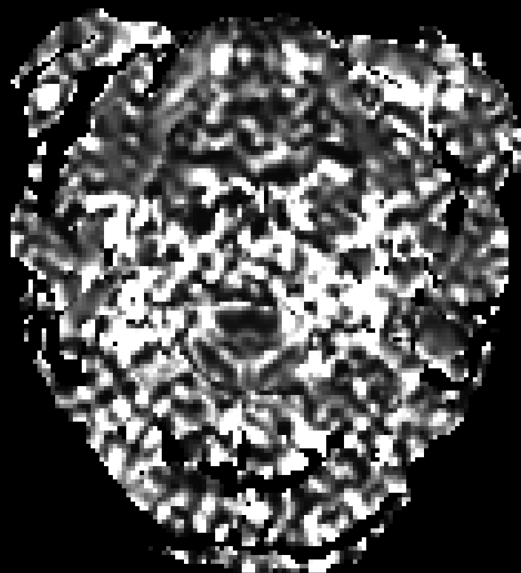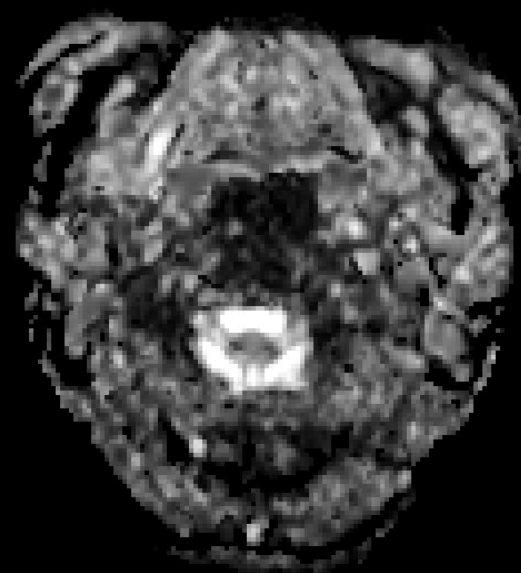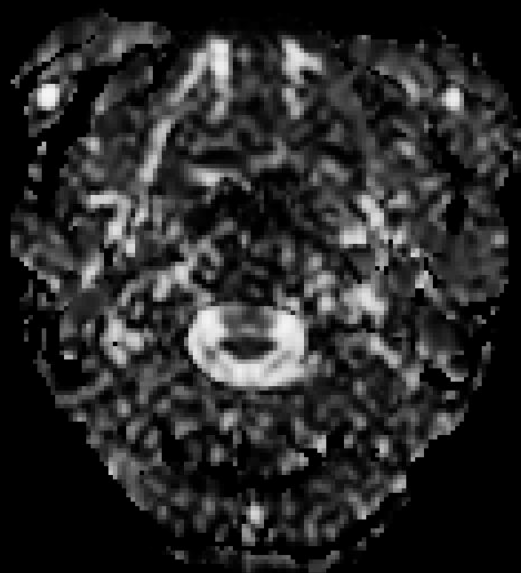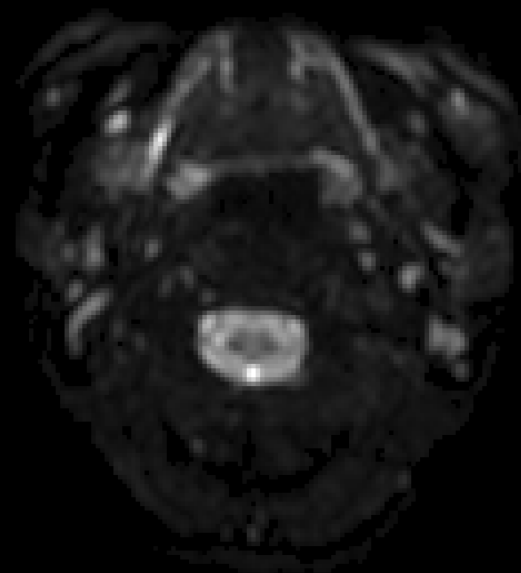

# Network instance 98

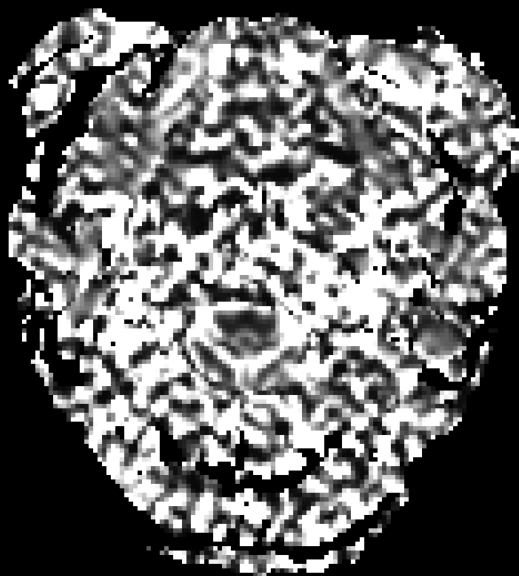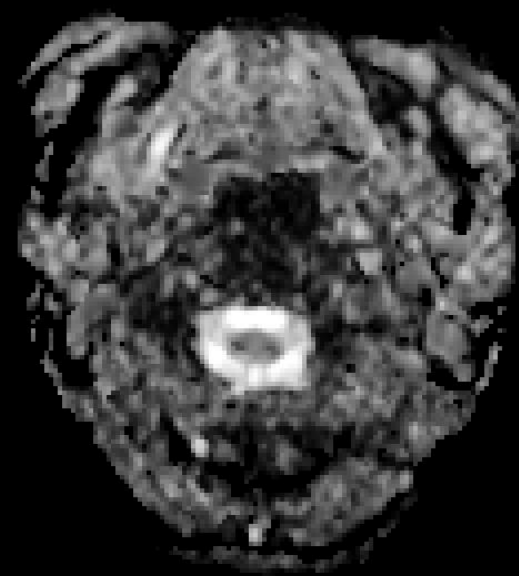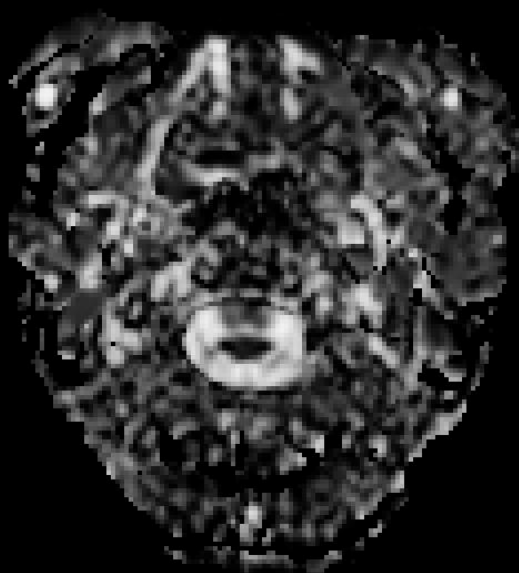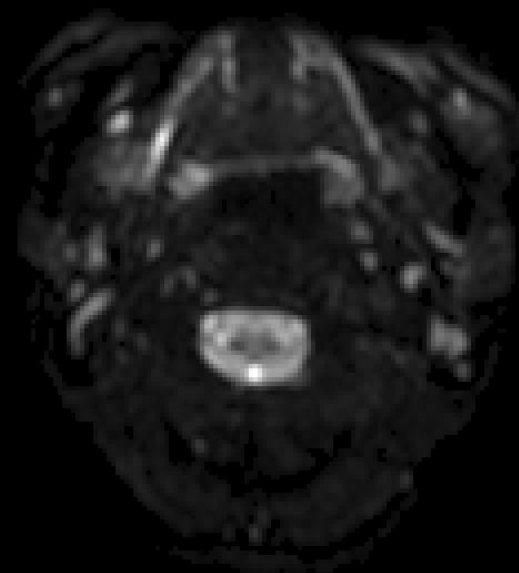

# Network instance 99

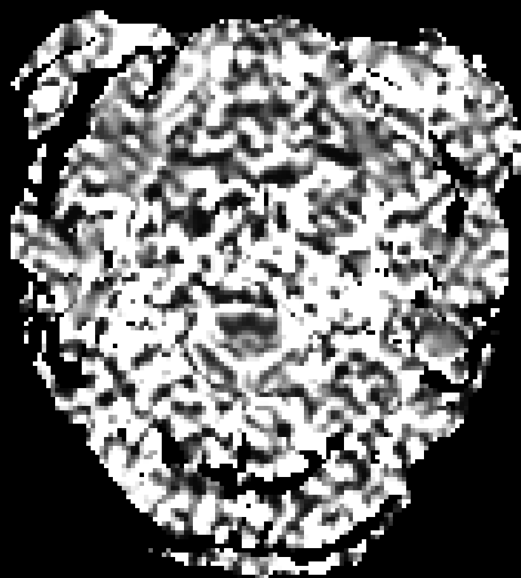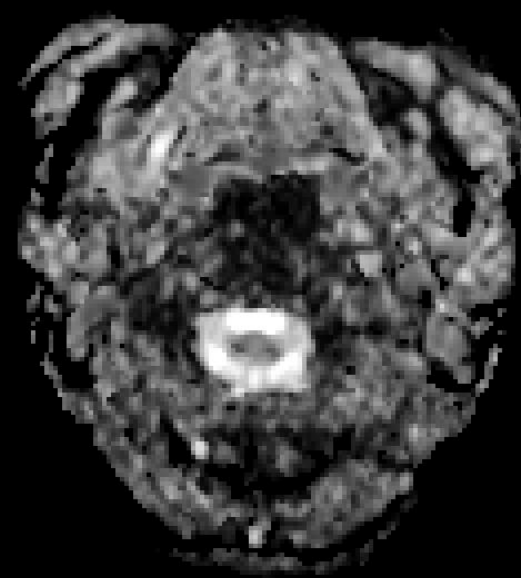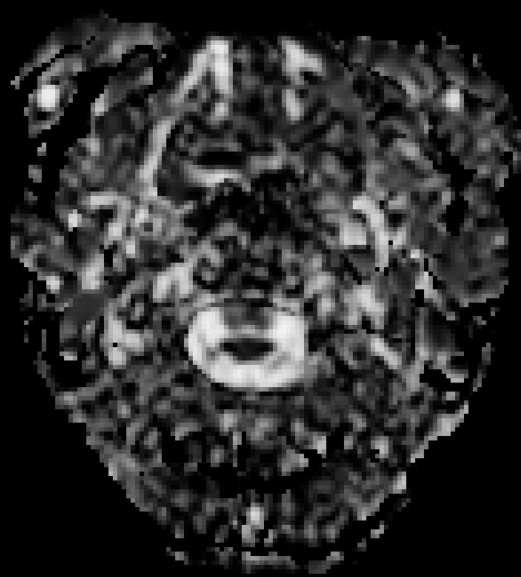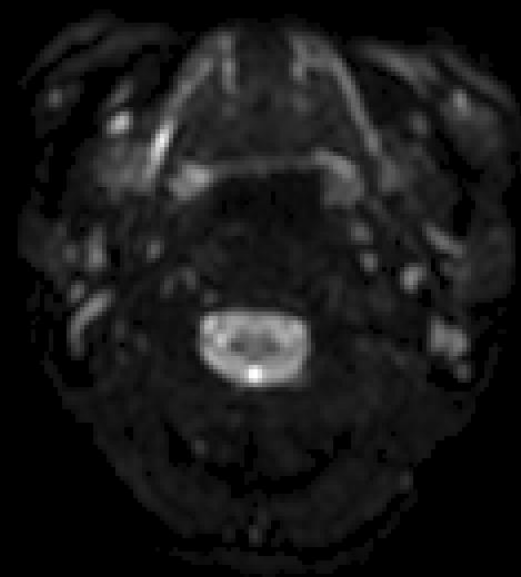

# Network instance 100

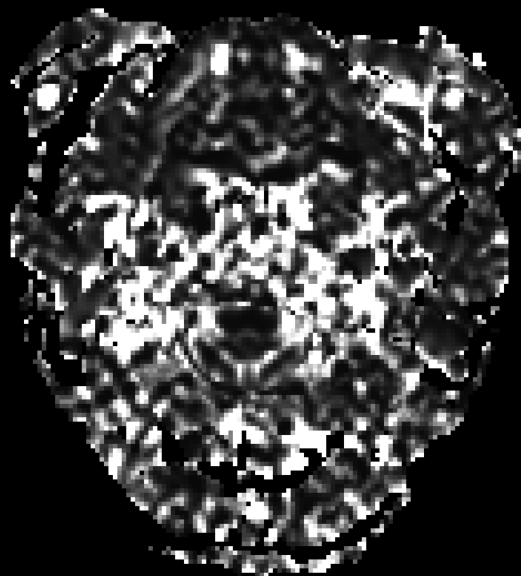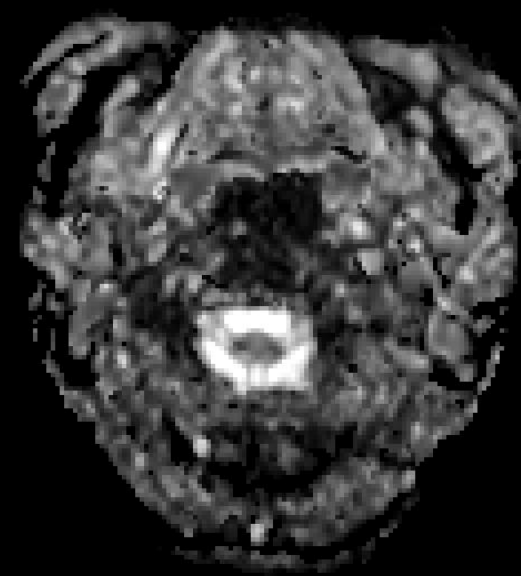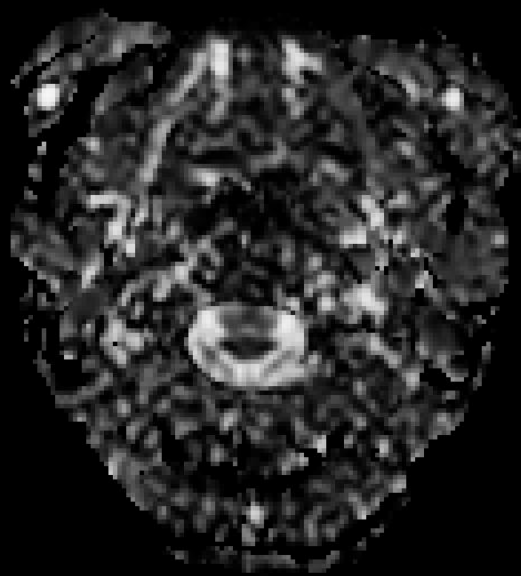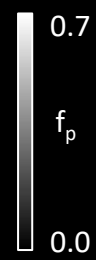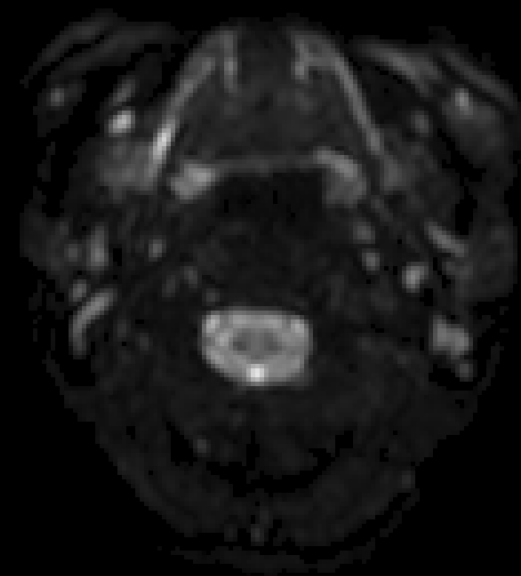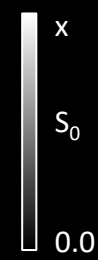

Supplement: MRM-85-3394-s001.pdf [file MRM-85-3394-s001.pdf]
